# Supplementary material for: The role of socio-demographic factors and physical functioning in the intra- and interpersonal variability of older adults’ sedentary time: an observational two- country study
Source: Research Square preprint supplement (doi:10.21203/rs.3.rs-1314624/v1), 2022-02-08
Supplement: Supplementary file 1 [file 543fc9f1e74072a8aef28a76.csv]

	Person_ID	numdate	period	dayofweeknum	TypeDay	st	lpa	mvpa	wear	validp	Site	Neigh_ID	Age	Sex	Education	Marital	Car	Neigh_SES	SPPB	DwDens_1km	DwDens_400m	RecFac_1km	RecFac_400m	ParkA_1km	ParkA_400m	Park_1km	Park_400m	Transp_1km	Transp_400m	Transp_D	IntDens_1km	IntDens_400m	Retail_1km	Retail_400m	Food_1km	Food_400m	Civic_1km	Civic_400m	Entert_1km	Entert_400m	validdays	ave_sed2	ave_mvpa2	ave_wear2	Destin_1km	Destin_400m
1	1	2010-11-13	0	6	1	21	38	1	60	1	2	207	76	0	0	1	1	1	11	971.525907	1145.351723	0.830793247	4.323969881	0.087382224	0.087382224	1	1	7.477139225	12.97190964	166.6766968	17.44665819	38.91572892	10.80031221	17.29587952	4.984759483	0	4.153966236	12.97190964	0.830793247	0	8	464.75	85	895.38	20.7698307037354	30.2677898406982
2	1	2010-11-13	1	6	1	34	26	0	60	3	2	207	76	0	0	1	1	1	11	971.525907	1145.351723	0.830793247	4.323969881	0.087382224	0.087382224	1	1	7.477139225	12.97190964	166.6766968	17.44665819	38.91572892	10.80031221	17.29587952	4.984759483	0	4.153966236	12.97190964	0.830793247	0	8	464.75	85	895.38	20.7698307037354	30.2677898406982
3	1	2010-11-13	2	6	1	55	5	0	60	3	2	207	76	0	0	1	1	1	11	971.525907	1145.351723	0.830793247	4.323969881	0.087382224	0.087382224	1	1	7.477139225	12.97190964	166.6766968	17.44665819	38.91572892	10.80031221	17.29587952	4.984759483	0	4.153966236	12.97190964	0.830793247	0	8	464.75	85	895.38	20.7698307037354	30.2677898406982
4	1	2010-11-13	3	6	1	39	21	0	60	3	2	207	76	0	0	1	1	1	11	971.525907	1145.351723	0.830793247	4.323969881	0.087382224	0.087382224	1	1	7.477139225	12.97190964	166.6766968	17.44665819	38.91572892	10.80031221	17.29587952	4.984759483	0	4.153966236	12.97190964	0.830793247	0	8	464.75	85	895.38	20.7698307037354	30.2677898406982
5	1	2010-11-13	4	6	1	49	5	1	55	1	2	207	76	0	0	1	1	1	11	971.525907	1145.351723	0.830793247	4.323969881	0.087382224	0.087382224	1	1	7.477139225	12.97190964	166.6766968	17.44665819	38.91572892	10.80031221	17.29587952	4.984759483	0	4.153966236	12.97190964	0.830793247	0	8	464.75	85	895.38	20.7698307037354	30.2677898406982
6	1	2010-11-14	0	0	1	21	23.75	1.5	46.25	3	2	207	76	0	0	1	1	1	11	971.525907	1145.351723	0.830793247	4.323969881	0.087382224	0.087382224	1	1	7.477139225	12.97190964	166.6766968	17.44665819	38.91572892	10.80031221	17.29587952	4.984759483	0	4.153966236	12.97190964	0.830793247	0	8	464.75	85	895.38	20.7698307037354	30.2677898406982
7	1	2010-11-14	1	0	1	14	41	5	60	3	2	207	76	0	0	1	1	1	11	971.525907	1145.351723	0.830793247	4.323969881	0.087382224	0.087382224	1	1	7.477139225	12.97190964	166.6766968	17.44665819	38.91572892	10.80031221	17.29587952	4.984759483	0	4.153966236	12.97190964	0.830793247	0	8	464.75	85	895.38	20.7698307037354	30.2677898406982
8	1	2010-11-14	2	0	1	45	14	1	60	3	2	207	76	0	0	1	1	1	11	971.525907	1145.351723	0.830793247	4.323969881	0.087382224	0.087382224	1	1	7.477139225	12.97190964	166.6766968	17.44665819	38.91572892	10.80031221	17.29587952	4.984759483	0	4.153966236	12.97190964	0.830793247	0	8	464.75	85	895.38	20.7698307037354	30.2677898406982
9	1	2010-11-14	3	0	1	43	17	0	60	3	2	207	76	0	0	1	1	1	11	971.525907	1145.351723	0.830793247	4.323969881	0.087382224	0.087382224	1	1	7.477139225	12.97190964	166.6766968	17.44665819	38.91572892	10.80031221	17.29587952	4.984759483	0	4.153966236	12.97190964	0.830793247	0	8	464.75	85	895.38	20.7698307037354	30.2677898406982
10	1	2010-11-14	4	0	1	54.6666679382324	5.33333349227905	0	60	3	2	207	76	0	0	1	1	1	11	971.525907	1145.351723	0.830793247	4.323969881	0.087382224	0.087382224	1	1	7.477139225	12.97190964	166.6766968	17.44665819	38.91572892	10.80031221	17.29587952	4.984759483	0	4.153966236	12.97190964	0.830793247	0	8	464.75	85	895.38	20.7698307037354	30.2677898406982
11	1	2010-11-15	0	1	0	20.3333339691162	32.3333320617676	4.33333349227905	57	3	2	207	76	0	0	1	1	1	11	971.525907	1145.351723	0.830793247	4.323969881	0.087382224	0.087382224	1	1	7.477139225	12.97190964	166.6766968	17.44665819	38.91572892	10.80031221	17.29587952	4.984759483	0	4.153966236	12.97190964	0.830793247	0	8	464.75	85	895.38	20.7698307037354	30.2677898406982
12	1	2010-11-15	1	1	0	8.25	29.25	22.5	60	3	2	207	76	0	0	1	1	1	11	971.525907	1145.351723	0.830793247	4.323969881	0.087382224	0.087382224	1	1	7.477139225	12.97190964	166.6766968	17.44665819	38.91572892	10.80031221	17.29587952	4.984759483	0	4.153966236	12.97190964	0.830793247	0	8	464.75	85	895.38	20.7698307037354	30.2677898406982
13	1	2010-11-15	2	1	0	37	21.6666660308838	1.33333337306976	60	3	2	207	76	0	0	1	1	1	11	971.525907	1145.351723	0.830793247	4.323969881	0.087382224	0.087382224	1	1	7.477139225	12.97190964	166.6766968	17.44665819	38.91572892	10.80031221	17.29587952	4.984759483	0	4.153966236	12.97190964	0.830793247	0	8	464.75	85	895.38	20.7698307037354	30.2677898406982
14	1	2010-11-15	3	1	0	37.3333320617676	20	2.66666674613953	60	3	2	207	76	0	0	1	1	1	11	971.525907	1145.351723	0.830793247	4.323969881	0.087382224	0.087382224	1	1	7.477139225	12.97190964	166.6766968	17.44665819	38.91572892	10.80031221	17.29587952	4.984759483	0	4.153966236	12.97190964	0.830793247	0	8	464.75	85	895.38	20.7698307037354	30.2677898406982
15	1	2010-11-15	4	1	0	50	9.66666698455811	0.333333343267441	60	3	2	207	76	0	0	1	1	1	11	971.525907	1145.351723	0.830793247	4.323969881	0.087382224	0.087382224	1	1	7.477139225	12.97190964	166.6766968	17.44665819	38.91572892	10.80031221	17.29587952	4.984759483	0	4.153966236	12.97190964	0.830793247	0	8	464.75	85	895.38	20.7698307037354	30.2677898406982
16	1	2010-11-16	0	2	0	15	38.5	0.5	54	2	2	207	76	0	0	1	1	1	11	971.525907	1145.351723	0.830793247	4.323969881	0.087382224	0.087382224	1	1	7.477139225	12.97190964	166.6766968	17.44665819	38.91572892	10.80031221	17.29587952	4.984759483	0	4.153966236	12.97190964	0.830793247	0	8	464.75	85	895.38	20.7698307037354	30.2677898406982
17	1	2010-11-16	1	2	0	17	36.75	6.25	60	3	2	207	76	0	0	1	1	1	11	971.525907	1145.351723	0.830793247	4.323969881	0.087382224	0.087382224	1	1	7.477139225	12.97190964	166.6766968	17.44665819	38.91572892	10.80031221	17.29587952	4.984759483	0	4.153966236	12.97190964	0.830793247	0	8	464.75	85	895.38	20.7698307037354	30.2677898406982
18	1	2010-11-16	2	2	0	20.6666660308838	15	24.3333339691162	60	3	2	207	76	0	0	1	1	1	11	971.525907	1145.351723	0.830793247	4.323969881	0.087382224	0.087382224	1	1	7.477139225	12.97190964	166.6766968	17.44665819	38.91572892	10.80031221	17.29587952	4.984759483	0	4.153966236	12.97190964	0.830793247	0	8	464.75	85	895.38	20.7698307037354	30.2677898406982
19	1	2010-11-16	3	2	0	28.6666660308838	16.6666660308838	14.6666669845581	60	3	2	207	76	0	0	1	1	1	11	971.525907	1145.351723	0.830793247	4.323969881	0.087382224	0.087382224	1	1	7.477139225	12.97190964	166.6766968	17.44665819	38.91572892	10.80031221	17.29587952	4.984759483	0	4.153966236	12.97190964	0.830793247	0	8	464.75	85	895.38	20.7698307037354	30.2677898406982
20	1	2010-11-16	4	2	0	50	10	0	60	3	2	207	76	0	0	1	1	1	11	971.525907	1145.351723	0.830793247	4.323969881	0.087382224	0.087382224	1	1	7.477139225	12.97190964	166.6766968	17.44665819	38.91572892	10.80031221	17.29587952	4.984759483	0	4.153966236	12.97190964	0.830793247	0	8	464.75	85	895.38	20.7698307037354	30.2677898406982
21	1	2010-11-17	0	3	0	8.66666698455811	30.6666660308838	7.33333349227905	46.6666679382324	3	2	207	76	0	0	1	1	1	11	971.525907	1145.351723	0.830793247	4.323969881	0.087382224	0.087382224	1	1	7.477139225	12.97190964	166.6766968	17.44665819	38.91572892	10.80031221	17.29587952	4.984759483	0	4.153966236	12.97190964	0.830793247	0	8	464.75	85	895.38	20.7698307037354	30.2677898406982
22	1	2010-11-17	1	3	0	6.66666650772095	25.6666660308838	27.6666660308838	60	3	2	207	76	0	0	1	1	1	11	971.525907	1145.351723	0.830793247	4.323969881	0.087382224	0.087382224	1	1	7.477139225	12.97190964	166.6766968	17.44665819	38.91572892	10.80031221	17.29587952	4.984759483	0	4.153966236	12.97190964	0.830793247	0	8	464.75	85	895.38	20.7698307037354	30.2677898406982
23	1	2010-11-17	2	3	0	31	14.3333330154419	14.6666669845581	60	3	2	207	76	0	0	1	1	1	11	971.525907	1145.351723	0.830793247	4.323969881	0.087382224	0.087382224	1	1	7.477139225	12.97190964	166.6766968	17.44665819	38.91572892	10.80031221	17.29587952	4.984759483	0	4.153966236	12.97190964	0.830793247	0	8	464.75	85	895.38	20.7698307037354	30.2677898406982
24	1	2010-11-17	3	3	0	35.6666679382324	23.3333339691162	1	60	3	2	207	76	0	0	1	1	1	11	971.525907	1145.351723	0.830793247	4.323969881	0.087382224	0.087382224	1	1	7.477139225	12.97190964	166.6766968	17.44665819	38.91572892	10.80031221	17.29587952	4.984759483	0	4.153966236	12.97190964	0.830793247	0	8	464.75	85	895.38	20.7698307037354	30.2677898406982
25	1	2010-11-17	4	3	0	53.6666679382324	6.33333349227905	0	60	3	2	207	76	0	0	1	1	1	11	971.525907	1145.351723	0.830793247	4.323969881	0.087382224	0.087382224	1	1	7.477139225	12.97190964	166.6766968	17.44665819	38.91572892	10.80031221	17.29587952	4.984759483	0	4.153966236	12.97190964	0.830793247	0	8	464.75	85	895.38	20.7698307037354	30.2677898406982
26	1	2010-11-18	0	4	0	27.3333339691162	20	1	48.3333320617676	3	2	207	76	0	0	1	1	1	11	971.525907	1145.351723	0.830793247	4.323969881	0.087382224	0.087382224	1	1	7.477139225	12.97190964	166.6766968	17.44665819	38.91572892	10.80031221	17.29587952	4.984759483	0	4.153966236	12.97190964	0.830793247	0	8	464.75	85	895.38	20.7698307037354	30.2677898406982
27	1	2010-11-18	1	4	0	9.25	43.75	7	60	3	2	207	76	0	0	1	1	1	11	971.525907	1145.351723	0.830793247	4.323969881	0.087382224	0.087382224	1	1	7.477139225	12.97190964	166.6766968	17.44665819	38.91572892	10.80031221	17.29587952	4.984759483	0	4.153966236	12.97190964	0.830793247	0	8	464.75	85	895.38	20.7698307037354	30.2677898406982
28	1	2010-11-18	2	4	0	18	39.6666679382324	2.33333325386047	60	3	2	207	76	0	0	1	1	1	11	971.525907	1145.351723	0.830793247	4.323969881	0.087382224	0.087382224	1	1	7.477139225	12.97190964	166.6766968	17.44665819	38.91572892	10.80031221	17.29587952	4.984759483	0	4.153966236	12.97190964	0.830793247	0	8	464.75	85	895.38	20.7698307037354	30.2677898406982
29	1	2010-11-18	3	4	0	21.3333339691162	27.6666660308838	11	60	3	2	207	76	0	0	1	1	1	11	971.525907	1145.351723	0.830793247	4.323969881	0.087382224	0.087382224	1	1	7.477139225	12.97190964	166.6766968	17.44665819	38.91572892	10.80031221	17.29587952	4.984759483	0	4.153966236	12.97190964	0.830793247	0	8	464.75	85	895.38	20.7698307037354	30.2677898406982
30	1	2010-11-18	4	4	0	48.6666679382324	11.3333330154419	0	60	3	2	207	76	0	0	1	1	1	11	971.525907	1145.351723	0.830793247	4.323969881	0.087382224	0.087382224	1	1	7.477139225	12.97190964	166.6766968	17.44665819	38.91572892	10.80031221	17.29587952	4.984759483	0	4.153966236	12.97190964	0.830793247	0	8	464.75	85	895.38	20.7698307037354	30.2677898406982
31	1	2010-11-19	0	5	0	16.5	22	15.5	54	2	2	207	76	0	0	1	1	1	11	971.525907	1145.351723	0.830793247	4.323969881	0.087382224	0.087382224	1	1	7.477139225	12.97190964	166.6766968	17.44665819	38.91572892	10.80031221	17.29587952	4.984759483	0	4.153966236	12.97190964	0.830793247	0	8	464.75	85	895.38	20.7698307037354	30.2677898406982
32	1	2010-11-19	1	5	0	15	39.6666679382324	5.33333349227905	60	3	2	207	76	0	0	1	1	1	11	971.525907	1145.351723	0.830793247	4.323969881	0.087382224	0.087382224	1	1	7.477139225	12.97190964	166.6766968	17.44665819	38.91572892	10.80031221	17.29587952	4.984759483	0	4.153966236	12.97190964	0.830793247	0	8	464.75	85	895.38	20.7698307037354	30.2677898406982
33	1	2010-11-19	2	5	0	15.1999998092651	31.2000007629395	13.6000003814697	60	3	2	207	76	0	0	1	1	1	11	971.525907	1145.351723	0.830793247	4.323969881	0.087382224	0.087382224	1	1	7.477139225	12.97190964	166.6766968	17.44665819	38.91572892	10.80031221	17.29587952	4.984759483	0	4.153966236	12.97190964	0.830793247	0	8	464.75	85	895.38	20.7698307037354	30.2677898406982
34	1	2010-11-19	3	5	0	30	21	9	60	3	2	207	76	0	0	1	1	1	11	971.525907	1145.351723	0.830793247	4.323969881	0.087382224	0.087382224	1	1	7.477139225	12.97190964	166.6766968	17.44665819	38.91572892	10.80031221	17.29587952	4.984759483	0	4.153966236	12.97190964	0.830793247	0	8	464.75	85	895.38	20.7698307037354	30.2677898406982
35	1	2010-11-19	4	5	0	51.3333320617676	8.66666698455811	0	60	3	2	207	76	0	0	1	1	1	11	971.525907	1145.351723	0.830793247	4.323969881	0.087382224	0.087382224	1	1	7.477139225	12.97190964	166.6766968	17.44665819	38.91572892	10.80031221	17.29587952	4.984759483	0	4.153966236	12.97190964	0.830793247	0	8	464.75	85	895.38	20.7698307037354	30.2677898406982
36	1	2010-11-20	0	6	1	28	14.3333330154419	0.666666686534882	43	3	2	207	76	0	0	1	1	1	11	971.525907	1145.351723	0.830793247	4.323969881	0.087382224	0.087382224	1	1	7.477139225	12.97190964	166.6766968	17.44665819	38.91572892	10.80031221	17.29587952	4.984759483	0	4.153966236	12.97190964	0.830793247	0	8	464.75	85	895.38	20.7698307037354	30.2677898406982
37	1	2010-11-20	1	6	1	26.3333339691162	33.3333320617676	0.333333343267441	60	3	2	207	76	0	0	1	1	1	11	971.525907	1145.351723	0.830793247	4.323969881	0.087382224	0.087382224	1	1	7.477139225	12.97190964	166.6766968	17.44665819	38.91572892	10.80031221	17.29587952	4.984759483	0	4.153966236	12.97190964	0.830793247	0	8	464.75	85	895.38	20.7698307037354	30.2677898406982
38	1	2010-11-20	2	6	1	33.75	24.25	2	60	3	2	207	76	0	0	1	1	1	11	971.525907	1145.351723	0.830793247	4.323969881	0.087382224	0.087382224	1	1	7.477139225	12.97190964	166.6766968	17.44665819	38.91572892	10.80031221	17.29587952	4.984759483	0	4.153966236	12.97190964	0.830793247	0	8	464.75	85	895.38	20.7698307037354	30.2677898406982
39	1	2010-11-20	3	6	1	24	31.75	4.25	60	3	2	207	76	0	0	1	1	1	11	971.525907	1145.351723	0.830793247	4.323969881	0.087382224	0.087382224	1	1	7.477139225	12.97190964	166.6766968	17.44665819	38.91572892	10.80031221	17.29587952	4.984759483	0	4.153966236	12.97190964	0.830793247	0	8	464.75	85	895.38	20.7698307037354	30.2677898406982
40	1	2010-11-20	4	6	1	44	16	0	60	3	2	207	76	0	0	1	1	1	11	971.525907	1145.351723	0.830793247	4.323969881	0.087382224	0.087382224	1	1	7.477139225	12.97190964	166.6766968	17.44665819	38.91572892	10.80031221	17.29587952	4.984759483	0	4.153966236	12.97190964	0.830793247	0	8	464.75	85	895.38	20.7698307037354	30.2677898406982
41	1	2010-11-21	3	0	1	45.5	14.5	0	60	2	2	207	76	0	0	1	1	1	11	971.525907	1145.351723	0.830793247	4.323969881	0.087382224	0.087382224	1	1	7.477139225	12.97190964	166.6766968	17.44665819	38.91572892	10.80031221	17.29587952	4.984759483	0	4.153966236	12.97190964	0.830793247	0	8	464.75	85	895.38	20.7698307037354	30.2677898406982
42	1	2010-11-21	4	0	1	36	5	1	42	1	2	207	76	0	0	1	1	1	11	971.525907	1145.351723	0.830793247	4.323969881	0.087382224	0.087382224	1	1	7.477139225	12.97190964	166.6766968	17.44665819	38.91572892	10.80031221	17.29587952	4.984759483	0	4.153966236	12.97190964	0.830793247	0	8	464.75	85	895.38	20.7698307037354	30.2677898406982
43	3	2010-11-13	1	6	1	9.5	44	3.5	57	3	2	207	74	0	0	0	1	1	8	859.58217	1004.655036	0.579601432	0	0.087382224	0	1	0	3.477608592	0	583.2837124	14.4900358	47.67723573	5.216412888	25.6723577	2.318405728	11.00243901	4.057210024	14.66991869	0	0	8	399.75	12.88	790.25	11.5920286178589	51.3447151184082
44	3	2010-11-13	2	6	1	31.6666660308838	27.3333339691162	1	60	3	2	207	74	0	0	0	1	1	8	859.58217	1004.655036	0.579601432	0	0.087382224	0	1	0	3.477608592	0	583.2837124	14.4900358	47.67723573	5.216412888	25.6723577	2.318405728	11.00243901	4.057210024	14.66991869	0	0	8	399.75	12.88	790.25	11.5920286178589	51.3447151184082
45	3	2010-11-13	3	6	1	41.6666679382324	15.3333330154419	3	60	3	2	207	74	0	0	0	1	1	8	859.58217	1004.655036	0.579601432	0	0.087382224	0	1	0	3.477608592	0	583.2837124	14.4900358	47.67723573	5.216412888	25.6723577	2.318405728	11.00243901	4.057210024	14.66991869	0	0	8	399.75	12.88	790.25	11.5920286178589	51.3447151184082
46	3	2010-11-13	4	6	1	37	21.3333339691162	1.66666662693024	60	3	2	207	74	0	0	0	1	1	8	859.58217	1004.655036	0.579601432	0	0.087382224	0	1	0	3.477608592	0	583.2837124	14.4900358	47.67723573	5.216412888	25.6723577	2.318405728	11.00243901	4.057210024	14.66991869	0	0	8	399.75	12.88	790.25	11.5920286178589	51.3447151184082
47	3	2010-11-14	1	0	1	16.5	42.75	0.75	60	3	2	207	74	0	0	0	1	1	8	859.58217	1004.655036	0.579601432	0	0.087382224	0	1	0	3.477608592	0	583.2837124	14.4900358	47.67723573	5.216412888	25.6723577	2.318405728	11.00243901	4.057210024	14.66991869	0	0	8	399.75	12.88	790.25	11.5920286178589	51.3447151184082
48	3	2010-11-14	2	0	1	12.8000001907349	45.5999984741211	1.60000002384186	60	3	2	207	74	0	0	0	1	1	8	859.58217	1004.655036	0.579601432	0	0.087382224	0	1	0	3.477608592	0	583.2837124	14.4900358	47.67723573	5.216412888	25.6723577	2.318405728	11.00243901	4.057210024	14.66991869	0	0	8	399.75	12.88	790.25	11.5920286178589	51.3447151184082
49	3	2010-11-14	3	0	1	12.3333330154419	44.6666679382324	3	60	3	2	207	74	0	0	0	1	1	8	859.58217	1004.655036	0.579601432	0	0.087382224	0	1	0	3.477608592	0	583.2837124	14.4900358	47.67723573	5.216412888	25.6723577	2.318405728	11.00243901	4.057210024	14.66991869	0	0	8	399.75	12.88	790.25	11.5920286178589	51.3447151184082
50	3	2010-11-14	4	0	1	46	14	0	60	3	2	207	74	0	0	0	1	1	8	859.58217	1004.655036	0.579601432	0	0.087382224	0	1	0	3.477608592	0	583.2837124	14.4900358	47.67723573	5.216412888	25.6723577	2.318405728	11.00243901	4.057210024	14.66991869	0	0	8	399.75	12.88	790.25	11.5920286178589	51.3447151184082
51	3	2010-11-15	2	1	0	29	30.75	0	59.75	3	2	207	74	0	0	0	1	1	8	859.58217	1004.655036	0.579601432	0	0.087382224	0	1	0	3.477608592	0	583.2837124	14.4900358	47.67723573	5.216412888	25.6723577	2.318405728	11.00243901	4.057210024	14.66991869	0	0	8	399.75	12.88	790.25	11.5920286178589	51.3447151184082
52	3	2010-11-15	3	1	0	34	26	0	60	3	2	207	74	0	0	0	1	1	8	859.58217	1004.655036	0.579601432	0	0.087382224	0	1	0	3.477608592	0	583.2837124	14.4900358	47.67723573	5.216412888	25.6723577	2.318405728	11.00243901	4.057210024	14.66991869	0	0	8	399.75	12.88	790.25	11.5920286178589	51.3447151184082
53	3	2010-11-15	4	1	0	39.25	20.75	0	60	3	2	207	74	0	0	0	1	1	8	859.58217	1004.655036	0.579601432	0	0.087382224	0	1	0	3.477608592	0	583.2837124	14.4900358	47.67723573	5.216412888	25.6723577	2.318405728	11.00243901	4.057210024	14.66991869	0	0	8	399.75	12.88	790.25	11.5920286178589	51.3447151184082
54	3	2010-11-16	0	2	0	2	17	0	19	1	2	207	74	0	0	0	1	1	8	859.58217	1004.655036	0.579601432	0	0.087382224	0	1	0	3.477608592	0	583.2837124	14.4900358	47.67723573	5.216412888	25.6723577	2.318405728	11.00243901	4.057210024	14.66991869	0	0	8	399.75	12.88	790.25	11.5920286178589	51.3447151184082
55	3	2010-11-16	1	2	0	30	29.3333339691162	0.666666686534882	60	3	2	207	74	0	0	0	1	1	8	859.58217	1004.655036	0.579601432	0	0.087382224	0	1	0	3.477608592	0	583.2837124	14.4900358	47.67723573	5.216412888	25.6723577	2.318405728	11.00243901	4.057210024	14.66991869	0	0	8	399.75	12.88	790.25	11.5920286178589	51.3447151184082
56	3	2010-11-16	2	2	0	48.6666679382324	11.3333330154419	0	60	3	2	207	74	0	0	0	1	1	8	859.58217	1004.655036	0.579601432	0	0.087382224	0	1	0	3.477608592	0	583.2837124	14.4900358	47.67723573	5.216412888	25.6723577	2.318405728	11.00243901	4.057210024	14.66991869	0	0	8	399.75	12.88	790.25	11.5920286178589	51.3447151184082
57	3	2010-11-16	3	2	0	28.3333339691162	31.3333339691162	0.333333343267441	60	3	2	207	74	0	0	0	1	1	8	859.58217	1004.655036	0.579601432	0	0.087382224	0	1	0	3.477608592	0	583.2837124	14.4900358	47.67723573	5.216412888	25.6723577	2.318405728	11.00243901	4.057210024	14.66991869	0	0	8	399.75	12.88	790.25	11.5920286178589	51.3447151184082
58	3	2010-11-16	4	2	0	46.5999984741211	13.3999996185303	0	60	3	2	207	74	0	0	0	1	1	8	859.58217	1004.655036	0.579601432	0	0.087382224	0	1	0	3.477608592	0	583.2837124	14.4900358	47.67723573	5.216412888	25.6723577	2.318405728	11.00243901	4.057210024	14.66991869	0	0	8	399.75	12.88	790.25	11.5920286178589	51.3447151184082
59	3	2010-11-17	0	3	0	0	2	0	2	2	2	207	74	0	0	0	1	1	8	859.58217	1004.655036	0.579601432	0	0.087382224	0	1	0	3.477608592	0	583.2837124	14.4900358	47.67723573	5.216412888	25.6723577	2.318405728	11.00243901	4.057210024	14.66991869	0	0	8	399.75	12.88	790.25	11.5920286178589	51.3447151184082
60	3	2010-11-17	1	3	0	4.5	29	0	33.5	2	2	207	74	0	0	0	1	1	8	859.58217	1004.655036	0.579601432	0	0.087382224	0	1	0	3.477608592	0	583.2837124	14.4900358	47.67723573	5.216412888	25.6723577	2.318405728	11.00243901	4.057210024	14.66991869	0	0	8	399.75	12.88	790.25	11.5920286178589	51.3447151184082
61	3	2010-11-17	2	3	0	31.3333339691162	26.3333339691162	2.33333325386047	60	3	2	207	74	0	0	0	1	1	8	859.58217	1004.655036	0.579601432	0	0.087382224	0	1	0	3.477608592	0	583.2837124	14.4900358	47.67723573	5.216412888	25.6723577	2.318405728	11.00243901	4.057210024	14.66991869	0	0	8	399.75	12.88	790.25	11.5920286178589	51.3447151184082
62	3	2010-11-17	3	3	0	24.6666660308838	32.3333320617676	3	60	3	2	207	74	0	0	0	1	1	8	859.58217	1004.655036	0.579601432	0	0.087382224	0	1	0	3.477608592	0	583.2837124	14.4900358	47.67723573	5.216412888	25.6723577	2.318405728	11.00243901	4.057210024	14.66991869	0	0	8	399.75	12.88	790.25	11.5920286178589	51.3447151184082
63	3	2010-11-17	4	3	0	34.3333320617676	25.6666660308838	0	60	3	2	207	74	0	0	0	1	1	8	859.58217	1004.655036	0.579601432	0	0.087382224	0	1	0	3.477608592	0	583.2837124	14.4900358	47.67723573	5.216412888	25.6723577	2.318405728	11.00243901	4.057210024	14.66991869	0	0	8	399.75	12.88	790.25	11.5920286178589	51.3447151184082
64	3	2010-11-18	1	4	0	7.66666650772095	51.3333320617676	1	60	3	2	207	74	0	0	0	1	1	8	859.58217	1004.655036	0.579601432	0	0.087382224	0	1	0	3.477608592	0	583.2837124	14.4900358	47.67723573	5.216412888	25.6723577	2.318405728	11.00243901	4.057210024	14.66991869	0	0	8	399.75	12.88	790.25	11.5920286178589	51.3447151184082
65	3	2010-11-18	2	4	0	16.6666660308838	42.6666679382324	0.666666686534882	60	3	2	207	74	0	0	0	1	1	8	859.58217	1004.655036	0.579601432	0	0.087382224	0	1	0	3.477608592	0	583.2837124	14.4900358	47.67723573	5.216412888	25.6723577	2.318405728	11.00243901	4.057210024	14.66991869	0	0	8	399.75	12.88	790.25	11.5920286178589	51.3447151184082
66	3	2010-11-18	3	4	0	14.6666669845581	42.3333320617676	3	60	3	2	207	74	0	0	0	1	1	8	859.58217	1004.655036	0.579601432	0	0.087382224	0	1	0	3.477608592	0	583.2837124	14.4900358	47.67723573	5.216412888	25.6723577	2.318405728	11.00243901	4.057210024	14.66991869	0	0	8	399.75	12.88	790.25	11.5920286178589	51.3447151184082
67	3	2010-11-18	4	4	0	31	18	0	49	2	2	207	74	0	0	0	1	1	8	859.58217	1004.655036	0.579601432	0	0.087382224	0	1	0	3.477608592	0	583.2837124	14.4900358	47.67723573	5.216412888	25.6723577	2.318405728	11.00243901	4.057210024	14.66991869	0	0	8	399.75	12.88	790.25	11.5920286178589	51.3447151184082
68	3	2010-11-21	0	0	1	34	23	3	60	1	2	207	74	0	0	0	1	1	8	859.58217	1004.655036	0.579601432	0	0.087382224	0	1	0	3.477608592	0	583.2837124	14.4900358	47.67723573	5.216412888	25.6723577	2.318405728	11.00243901	4.057210024	14.66991869	0	0	8	399.75	12.88	790.25	11.5920286178589	51.3447151184082
69	3	2010-11-21	1	0	1	13.5	40.75	2.75	57	3	2	207	74	0	0	0	1	1	8	859.58217	1004.655036	0.579601432	0	0.087382224	0	1	0	3.477608592	0	583.2837124	14.4900358	47.67723573	5.216412888	25.6723577	2.318405728	11.00243901	4.057210024	14.66991869	0	0	8	399.75	12.88	790.25	11.5920286178589	51.3447151184082
70	3	2010-11-21	2	0	1	19	40.6666679382324	0.333333343267441	60	3	2	207	74	0	0	0	1	1	8	859.58217	1004.655036	0.579601432	0	0.087382224	0	1	0	3.477608592	0	583.2837124	14.4900358	47.67723573	5.216412888	25.6723577	2.318405728	11.00243901	4.057210024	14.66991869	0	0	8	399.75	12.88	790.25	11.5920286178589	51.3447151184082
71	3	2010-11-21	3	0	1	39.3333320617676	20	0.666666686534882	60	3	2	207	74	0	0	0	1	1	8	859.58217	1004.655036	0.579601432	0	0.087382224	0	1	0	3.477608592	0	583.2837124	14.4900358	47.67723573	5.216412888	25.6723577	2.318405728	11.00243901	4.057210024	14.66991869	0	0	8	399.75	12.88	790.25	11.5920286178589	51.3447151184082
72	3	2010-11-21	4	0	1	30	24.5	0	54.5	2	2	207	74	0	0	0	1	1	8	859.58217	1004.655036	0.579601432	0	0.087382224	0	1	0	3.477608592	0	583.2837124	14.4900358	47.67723573	5.216412888	25.6723577	2.318405728	11.00243901	4.057210024	14.66991869	0	0	8	399.75	12.88	790.25	11.5920286178589	51.3447151184082
73	5	2010-11-13	1	6	1	16.3333339691162	42.6666679382324	1	60	3	2	207	85	1	1	0	1	1	9	942.3840143	1249.63125	0.892739755	6.923609605	0.087382224	0.087382224	1	1	7.141918039	13.84721921	276.4445999	17.8547951	62.31248644	8.927397548	27.69443842	3.570959019	0	4.463698774	6.923609605	0.892739755	0	12	537.75	27.08	857.75	17.8547954559326	34.618049621582
74	5	2010-11-13	2	6	1	17	43	0	60	3	2	207	85	1	1	0	1	1	9	942.3840143	1249.63125	0.892739755	6.923609605	0.087382224	0.087382224	1	1	7.141918039	13.84721921	276.4445999	17.8547951	62.31248644	8.927397548	27.69443842	3.570959019	0	4.463698774	6.923609605	0.892739755	0	12	537.75	27.08	857.75	17.8547954559326	34.618049621582
75	5	2010-11-13	3	6	1	32	28	0	60	3	2	207	85	1	1	0	1	1	9	942.3840143	1249.63125	0.892739755	6.923609605	0.087382224	0.087382224	1	1	7.141918039	13.84721921	276.4445999	17.8547951	62.31248644	8.927397548	27.69443842	3.570959019	0	4.463698774	6.923609605	0.892739755	0	12	537.75	27.08	857.75	17.8547954559326	34.618049621582
76	5	2010-11-13	4	6	1	46	14	0	60	3	2	207	85	1	1	0	1	1	9	942.3840143	1249.63125	0.892739755	6.923609605	0.087382224	0.087382224	1	1	7.141918039	13.84721921	276.4445999	17.8547951	62.31248644	8.927397548	27.69443842	3.570959019	0	4.463698774	6.923609605	0.892739755	0	12	537.75	27.08	857.75	17.8547954559326	34.618049621582
77	5	2010-11-14	0	0	1	2	17	0	19	1	2	207	85	1	1	0	1	1	9	942.3840143	1249.63125	0.892739755	6.923609605	0.087382224	0.087382224	1	1	7.141918039	13.84721921	276.4445999	17.8547951	62.31248644	8.927397548	27.69443842	3.570959019	0	4.463698774	6.923609605	0.892739755	0	12	537.75	27.08	857.75	17.8547954559326	34.618049621582
78	5	2010-11-14	1	0	1	29.5	29.5	1	60	2	2	207	85	1	1	0	1	1	9	942.3840143	1249.63125	0.892739755	6.923609605	0.087382224	0.087382224	1	1	7.141918039	13.84721921	276.4445999	17.8547951	62.31248644	8.927397548	27.69443842	3.570959019	0	4.463698774	6.923609605	0.892739755	0	12	537.75	27.08	857.75	17.8547954559326	34.618049621582
79	5	2010-11-14	2	0	1	34.6666679382324	25	0	59.6666679382324	3	2	207	85	1	1	0	1	1	9	942.3840143	1249.63125	0.892739755	6.923609605	0.087382224	0.087382224	1	1	7.141918039	13.84721921	276.4445999	17.8547951	62.31248644	8.927397548	27.69443842	3.570959019	0	4.463698774	6.923609605	0.892739755	0	12	537.75	27.08	857.75	17.8547954559326	34.618049621582
80	5	2010-11-14	3	0	1	32.3333320617676	27.6666660308838	0	60	3	2	207	85	1	1	0	1	1	9	942.3840143	1249.63125	0.892739755	6.923609605	0.087382224	0.087382224	1	1	7.141918039	13.84721921	276.4445999	17.8547951	62.31248644	8.927397548	27.69443842	3.570959019	0	4.463698774	6.923609605	0.892739755	0	12	537.75	27.08	857.75	17.8547954559326	34.618049621582
81	5	2010-11-14	4	0	1	42.8333320617676	17.1666660308838	0	60	3	2	207	85	1	1	0	1	1	9	942.3840143	1249.63125	0.892739755	6.923609605	0.087382224	0.087382224	1	1	7.141918039	13.84721921	276.4445999	17.8547951	62.31248644	8.927397548	27.69443842	3.570959019	0	4.463698774	6.923609605	0.892739755	0	12	537.75	27.08	857.75	17.8547954559326	34.618049621582
82	5	2010-11-15	0	1	0	0	1	0	1	1	2	207	85	1	1	0	1	1	9	942.3840143	1249.63125	0.892739755	6.923609605	0.087382224	0.087382224	1	1	7.141918039	13.84721921	276.4445999	17.8547951	62.31248644	8.927397548	27.69443842	3.570959019	0	4.463698774	6.923609605	0.892739755	0	12	537.75	27.08	857.75	17.8547954559326	34.618049621582
83	5	2010-11-15	1	1	0	13.3333330154419	29	0	42.3333320617676	3	2	207	85	1	1	0	1	1	9	942.3840143	1249.63125	0.892739755	6.923609605	0.087382224	0.087382224	1	1	7.141918039	13.84721921	276.4445999	17.8547951	62.31248644	8.927397548	27.69443842	3.570959019	0	4.463698774	6.923609605	0.892739755	0	12	537.75	27.08	857.75	17.8547954559326	34.618049621582
84	5	2010-11-15	2	1	0	43.5	16.5	0	60	3	2	207	85	1	1	0	1	1	9	942.3840143	1249.63125	0.892739755	6.923609605	0.087382224	0.087382224	1	1	7.141918039	13.84721921	276.4445999	17.8547951	62.31248644	8.927397548	27.69443842	3.570959019	0	4.463698774	6.923609605	0.892739755	0	12	537.75	27.08	857.75	17.8547954559326	34.618049621582
85	5	2010-11-15	3	1	0	28.3333339691162	31.3333339691162	0.333333343267441	60	3	2	207	85	1	1	0	1	1	9	942.3840143	1249.63125	0.892739755	6.923609605	0.087382224	0.087382224	1	1	7.141918039	13.84721921	276.4445999	17.8547951	62.31248644	8.927397548	27.69443842	3.570959019	0	4.463698774	6.923609605	0.892739755	0	12	537.75	27.08	857.75	17.8547954559326	34.618049621582
86	5	2010-11-15	4	1	0	44.3333320617676	15.6666669845581	0	60	3	2	207	85	1	1	0	1	1	9	942.3840143	1249.63125	0.892739755	6.923609605	0.087382224	0.087382224	1	1	7.141918039	13.84721921	276.4445999	17.8547951	62.31248644	8.927397548	27.69443842	3.570959019	0	4.463698774	6.923609605	0.892739755	0	12	537.75	27.08	857.75	17.8547954559326	34.618049621582
87	5	2010-11-16	0	2	0	0	3	0	3	1	2	207	85	1	1	0	1	1	9	942.3840143	1249.63125	0.892739755	6.923609605	0.087382224	0.087382224	1	1	7.141918039	13.84721921	276.4445999	17.8547951	62.31248644	8.927397548	27.69443842	3.570959019	0	4.463698774	6.923609605	0.892739755	0	12	537.75	27.08	857.75	17.8547954559326	34.618049621582
88	5	2010-11-16	1	2	0	7.66666650772095	51.3333320617676	1	60	3	2	207	85	1	1	0	1	1	9	942.3840143	1249.63125	0.892739755	6.923609605	0.087382224	0.087382224	1	1	7.141918039	13.84721921	276.4445999	17.8547951	62.31248644	8.927397548	27.69443842	3.570959019	0	4.463698774	6.923609605	0.892739755	0	12	537.75	27.08	857.75	17.8547954559326	34.618049621582
89	5	2010-11-16	2	2	0	23.2000007629395	35	1.79999995231628	60	3	2	207	85	1	1	0	1	1	9	942.3840143	1249.63125	0.892739755	6.923609605	0.087382224	0.087382224	1	1	7.141918039	13.84721921	276.4445999	17.8547951	62.31248644	8.927397548	27.69443842	3.570959019	0	4.463698774	6.923609605	0.892739755	0	12	537.75	27.08	857.75	17.8547954559326	34.618049621582
90	5	2010-11-16	3	2	0	24.6666660308838	32.3333320617676	3	60	3	2	207	85	1	1	0	1	1	9	942.3840143	1249.63125	0.892739755	6.923609605	0.087382224	0.087382224	1	1	7.141918039	13.84721921	276.4445999	17.8547951	62.31248644	8.927397548	27.69443842	3.570959019	0	4.463698774	6.923609605	0.892739755	0	12	537.75	27.08	857.75	17.8547954559326	34.618049621582
91	5	2010-11-16	4	2	0	34.3333320617676	25.6666660308838	0	60	3	2	207	85	1	1	0	1	1	9	942.3840143	1249.63125	0.892739755	6.923609605	0.087382224	0.087382224	1	1	7.141918039	13.84721921	276.4445999	17.8547951	62.31248644	8.927397548	27.69443842	3.570959019	0	4.463698774	6.923609605	0.892739755	0	12	537.75	27.08	857.75	17.8547954559326	34.618049621582
92	5	2010-11-17	3	3	0	14.6666669845581	42.3333320617676	3	60	3	2	207	85	1	1	0	1	1	9	942.3840143	1249.63125	0.892739755	6.923609605	0.087382224	0.087382224	1	1	7.141918039	13.84721921	276.4445999	17.8547951	62.31248644	8.927397548	27.69443842	3.570959019	0	4.463698774	6.923609605	0.892739755	0	12	537.75	27.08	857.75	17.8547954559326	34.618049621582
93	5	2010-11-17	4	3	0	31	18	0	49	2	2	207	85	1	1	0	1	1	9	942.3840143	1249.63125	0.892739755	6.923609605	0.087382224	0.087382224	1	1	7.141918039	13.84721921	276.4445999	17.8547951	62.31248644	8.927397548	27.69443842	3.570959019	0	4.463698774	6.923609605	0.892739755	0	12	537.75	27.08	857.75	17.8547954559326	34.618049621582
94	5	2010-11-18	0	4	0	34	23	3	60	1	2	207	85	1	1	0	1	1	9	942.3840143	1249.63125	0.892739755	6.923609605	0.087382224	0.087382224	1	1	7.141918039	13.84721921	276.4445999	17.8547951	62.31248644	8.927397548	27.69443842	3.570959019	0	4.463698774	6.923609605	0.892739755	0	12	537.75	27.08	857.75	17.8547954559326	34.618049621582
95	5	2010-11-18	1	4	0	15.6666669845581	41	3.33333325386047	60	3	2	207	85	1	1	0	1	1	9	942.3840143	1249.63125	0.892739755	6.923609605	0.087382224	0.087382224	1	1	7.141918039	13.84721921	276.4445999	17.8547951	62.31248644	8.927397548	27.69443842	3.570959019	0	4.463698774	6.923609605	0.892739755	0	12	537.75	27.08	857.75	17.8547954559326	34.618049621582
96	5	2010-11-18	2	4	0	25	34	1	60	1	2	207	85	1	1	0	1	1	9	942.3840143	1249.63125	0.892739755	6.923609605	0.087382224	0.087382224	1	1	7.141918039	13.84721921	276.4445999	17.8547951	62.31248644	8.927397548	27.69443842	3.570959019	0	4.463698774	6.923609605	0.892739755	0	12	537.75	27.08	857.75	17.8547954559326	34.618049621582
97	5	2010-11-19	1	5	0	9	46.6666679382324	0.333333343267441	56	3	2	207	85	1	1	0	1	1	9	942.3840143	1249.63125	0.892739755	6.923609605	0.087382224	0.087382224	1	1	7.141918039	13.84721921	276.4445999	17.8547951	62.31248644	8.927397548	27.69443842	3.570959019	0	4.463698774	6.923609605	0.892739755	0	12	537.75	27.08	857.75	17.8547954559326	34.618049621582
98	5	2010-11-19	2	5	0	25.3999996185303	34	0.600000023841858	60	3	2	207	85	1	1	0	1	1	9	942.3840143	1249.63125	0.892739755	6.923609605	0.087382224	0.087382224	1	1	7.141918039	13.84721921	276.4445999	17.8547951	62.31248644	8.927397548	27.69443842	3.570959019	0	4.463698774	6.923609605	0.892739755	0	12	537.75	27.08	857.75	17.8547954559326	34.618049621582
99	5	2010-11-19	3	5	0	37.5999984741211	20.7999992370605	1.60000002384186	60	3	2	207	85	1	1	0	1	1	9	942.3840143	1249.63125	0.892739755	6.923609605	0.087382224	0.087382224	1	1	7.141918039	13.84721921	276.4445999	17.8547951	62.31248644	8.927397548	27.69443842	3.570959019	0	4.463698774	6.923609605	0.892739755	0	12	537.75	27.08	857.75	17.8547954559326	34.618049621582
100	5	2010-11-19	4	5	0	30	24.5	0	54.5	2	2	207	85	1	1	0	1	1	9	942.3840143	1249.63125	0.892739755	6.923609605	0.087382224	0.087382224	1	1	7.141918039	13.84721921	276.4445999	17.8547951	62.31248644	8.927397548	27.69443842	3.570959019	0	4.463698774	6.923609605	0.892739755	0	12	537.75	27.08	857.75	17.8547954559326	34.618049621582
101	5	2010-11-20	1	6	1	11.6666669845581	39.6666679382324	4.66666650772095	56	3	2	207	85	1	1	0	1	1	9	942.3840143	1249.63125	0.892739755	6.923609605	0.087382224	0.087382224	1	1	7.141918039	13.84721921	276.4445999	17.8547951	62.31248644	8.927397548	27.69443842	3.570959019	0	4.463698774	6.923609605	0.892739755	0	12	537.75	27.08	857.75	17.8547954559326	34.618049621582
102	5	2010-11-20	2	6	1	8.33333301544189	49	2.66666674613953	60	3	2	207	85	1	1	0	1	1	9	942.3840143	1249.63125	0.892739755	6.923609605	0.087382224	0.087382224	1	1	7.141918039	13.84721921	276.4445999	17.8547951	62.31248644	8.927397548	27.69443842	3.570959019	0	4.463698774	6.923609605	0.892739755	0	12	537.75	27.08	857.75	17.8547954559326	34.618049621582
103	5	2010-11-20	3	6	1	23.6666660308838	32.3333320617676	4	60	3	2	207	85	1	1	0	1	1	9	942.3840143	1249.63125	0.892739755	6.923609605	0.087382224	0.087382224	1	1	7.141918039	13.84721921	276.4445999	17.8547951	62.31248644	8.927397548	27.69443842	3.570959019	0	4.463698774	6.923609605	0.892739755	0	12	537.75	27.08	857.75	17.8547954559326	34.618049621582
104	5	2010-11-20	4	6	1	37	21.3333339691162	1.66666662693024	60	3	2	207	85	1	1	0	1	1	9	942.3840143	1249.63125	0.892739755	6.923609605	0.087382224	0.087382224	1	1	7.141918039	13.84721921	276.4445999	17.8547951	62.31248644	8.927397548	27.69443842	3.570959019	0	4.463698774	6.923609605	0.892739755	0	12	537.75	27.08	857.75	17.8547954559326	34.618049621582
105	8	2010-11-13	0	6	1	35	22	0	57	1	2	207	71	0	1	0	1	1	11	881.3318984	1314.527243	0.687147966	0	0.087382224	0	1	0	4.122887796	0	444.0798154	13.74295932	54.35852644	6.184331694	22.64938602	2.061443898	4.529877203	4.122887796	13.58963161	0.687147966	0	8	528.63	15.5	899.88	13.0558109283447	40.7688941955566
106	8	2010-11-13	1	6	1	25.6666660308838	30.6666660308838	3.66666674613953	60	3	2	207	71	0	1	0	1	1	11	881.3318984	1314.527243	0.687147966	0	0.087382224	0	1	0	4.122887796	0	444.0798154	13.74295932	54.35852644	6.184331694	22.64938602	2.061443898	4.529877203	4.122887796	13.58963161	0.687147966	0	8	528.63	15.5	899.88	13.0558109283447	40.7688941955566
107	8	2010-11-13	2	6	1	28.3333339691162	31.3333339691162	0.333333343267441	60	3	2	207	71	0	1	0	1	1	11	881.3318984	1314.527243	0.687147966	0	0.087382224	0	1	0	4.122887796	0	444.0798154	13.74295932	54.35852644	6.184331694	22.64938602	2.061443898	4.529877203	4.122887796	13.58963161	0.687147966	0	8	528.63	15.5	899.88	13.0558109283447	40.7688941955566
108	8	2010-11-13	3	6	1	41	17.6666660308838	1.33333337306976	60	3	2	207	71	0	1	0	1	1	11	881.3318984	1314.527243	0.687147966	0	0.087382224	0	1	0	4.122887796	0	444.0798154	13.74295932	54.35852644	6.184331694	22.64938602	2.061443898	4.529877203	4.122887796	13.58963161	0.687147966	0	8	528.63	15.5	899.88	13.0558109283447	40.7688941955566
109	8	2010-11-13	4	6	1	43.6666679382324	16.1666660308838	0.16666667163372	60	3	2	207	71	0	1	0	1	1	11	881.3318984	1314.527243	0.687147966	0	0.087382224	0	1	0	4.122887796	0	444.0798154	13.74295932	54.35852644	6.184331694	22.64938602	2.061443898	4.529877203	4.122887796	13.58963161	0.687147966	0	8	528.63	15.5	899.88	13.0558109283447	40.7688941955566
110	8	2010-11-14	0	0	1	12	10.5	0.5	23	2	2	207	71	0	1	0	1	1	11	881.3318984	1314.527243	0.687147966	0	0.087382224	0	1	0	4.122887796	0	444.0798154	13.74295932	54.35852644	6.184331694	22.64938602	2.061443898	4.529877203	4.122887796	13.58963161	0.687147966	0	8	528.63	15.5	899.88	13.0558109283447	40.7688941955566
111	8	2010-11-14	1	0	1	35	23.1666660308838	1.83333337306976	60	3	2	207	71	0	1	0	1	1	11	881.3318984	1314.527243	0.687147966	0	0.087382224	0	1	0	4.122887796	0	444.0798154	13.74295932	54.35852644	6.184331694	22.64938602	2.061443898	4.529877203	4.122887796	13.58963161	0.687147966	0	8	528.63	15.5	899.88	13.0558109283447	40.7688941955566
112	8	2010-11-14	2	0	1	21	38.25	0.75	60	3	2	207	71	0	1	0	1	1	11	881.3318984	1314.527243	0.687147966	0	0.087382224	0	1	0	4.122887796	0	444.0798154	13.74295932	54.35852644	6.184331694	22.64938602	2.061443898	4.529877203	4.122887796	13.58963161	0.687147966	0	8	528.63	15.5	899.88	13.0558109283447	40.7688941955566
113	8	2010-11-14	3	0	1	29.6666660308838	30.3333339691162	0	60	3	2	207	71	0	1	0	1	1	11	881.3318984	1314.527243	0.687147966	0	0.087382224	0	1	0	4.122887796	0	444.0798154	13.74295932	54.35852644	6.184331694	22.64938602	2.061443898	4.529877203	4.122887796	13.58963161	0.687147966	0	8	528.63	15.5	899.88	13.0558109283447	40.7688941955566
114	8	2010-11-14	4	0	1	37.6666679382324	22.3333339691162	0	60	3	2	207	71	0	1	0	1	1	11	881.3318984	1314.527243	0.687147966	0	0.087382224	0	1	0	4.122887796	0	444.0798154	13.74295932	54.35852644	6.184331694	22.64938602	2.061443898	4.529877203	4.122887796	13.58963161	0.687147966	0	8	528.63	15.5	899.88	13.0558109283447	40.7688941955566
115	8	2010-11-15	0	1	0	16	41	1	58	1	2	207	71	0	1	0	1	1	11	881.3318984	1314.527243	0.687147966	0	0.087382224	0	1	0	4.122887796	0	444.0798154	13.74295932	54.35852644	6.184331694	22.64938602	2.061443898	4.529877203	4.122887796	13.58963161	0.687147966	0	8	528.63	15.5	899.88	13.0558109283447	40.7688941955566
116	8	2010-11-15	1	1	0	28.3333339691162	30	1.66666662693024	60	3	2	207	71	0	1	0	1	1	11	881.3318984	1314.527243	0.687147966	0	0.087382224	0	1	0	4.122887796	0	444.0798154	13.74295932	54.35852644	6.184331694	22.64938602	2.061443898	4.529877203	4.122887796	13.58963161	0.687147966	0	8	528.63	15.5	899.88	13.0558109283447	40.7688941955566
117	8	2010-11-15	2	1	0	35	22.3999996185303	2.59999990463257	60	3	2	207	71	0	1	0	1	1	11	881.3318984	1314.527243	0.687147966	0	0.087382224	0	1	0	4.122887796	0	444.0798154	13.74295932	54.35852644	6.184331694	22.64938602	2.061443898	4.529877203	4.122887796	13.58963161	0.687147966	0	8	528.63	15.5	899.88	13.0558109283447	40.7688941955566
118	8	2010-11-15	3	1	0	34	17.3999996185303	0.600000023841858	52	3	2	207	71	0	1	0	1	1	11	881.3318984	1314.527243	0.687147966	0	0.087382224	0	1	0	4.122887796	0	444.0798154	13.74295932	54.35852644	6.184331694	22.64938602	2.061443898	4.529877203	4.122887796	13.58963161	0.687147966	0	8	528.63	15.5	899.88	13.0558109283447	40.7688941955566
119	8	2010-11-15	4	1	0	36	18.5	0.5	55	2	2	207	71	0	1	0	1	1	11	881.3318984	1314.527243	0.687147966	0	0.087382224	0	1	0	4.122887796	0	444.0798154	13.74295932	54.35852644	6.184331694	22.64938602	2.061443898	4.529877203	4.122887796	13.58963161	0.687147966	0	8	528.63	15.5	899.88	13.0558109283447	40.7688941955566
120	8	2010-11-16	4	2	0	46.3333320617676	13.6666669845581	0	60	3	2	207	71	0	1	0	1	1	11	881.3318984	1314.527243	0.687147966	0	0.087382224	0	1	0	4.122887796	0	444.0798154	13.74295932	54.35852644	6.184331694	22.64938602	2.061443898	4.529877203	4.122887796	13.58963161	0.687147966	0	8	528.63	15.5	899.88	13.0558109283447	40.7688941955566
121	8	2010-11-17	0	3	0	41	17	2	60	1	2	207	71	0	1	0	1	1	11	881.3318984	1314.527243	0.687147966	0	0.087382224	0	1	0	4.122887796	0	444.0798154	13.74295932	54.35852644	6.184331694	22.64938602	2.061443898	4.529877203	4.122887796	13.58963161	0.687147966	0	8	528.63	15.5	899.88	13.0558109283447	40.7688941955566
122	8	2010-11-17	1	3	0	21.3333339691162	37.3333320617676	1.33333337306976	60	3	2	207	71	0	1	0	1	1	11	881.3318984	1314.527243	0.687147966	0	0.087382224	0	1	0	4.122887796	0	444.0798154	13.74295932	54.35852644	6.184331694	22.64938602	2.061443898	4.529877203	4.122887796	13.58963161	0.687147966	0	8	528.63	15.5	899.88	13.0558109283447	40.7688941955566
123	8	2010-11-17	2	3	0	36.3333320617676	21.6666660308838	2	60	3	2	207	71	0	1	0	1	1	11	881.3318984	1314.527243	0.687147966	0	0.087382224	0	1	0	4.122887796	0	444.0798154	13.74295932	54.35852644	6.184331694	22.64938602	2.061443898	4.529877203	4.122887796	13.58963161	0.687147966	0	8	528.63	15.5	899.88	13.0558109283447	40.7688941955566
124	8	2010-11-17	3	3	0	51	9	0	60	1	2	207	71	0	1	0	1	1	11	881.3318984	1314.527243	0.687147966	0	0.087382224	0	1	0	4.122887796	0	444.0798154	13.74295932	54.35852644	6.184331694	22.64938602	2.061443898	4.529877203	4.122887796	13.58963161	0.687147966	0	8	528.63	15.5	899.88	13.0558109283447	40.7688941955566
125	8	2010-11-18	0	4	0	15	36.5	1.5	53	2	2	207	71	0	1	0	1	1	11	881.3318984	1314.527243	0.687147966	0	0.087382224	0	1	0	4.122887796	0	444.0798154	13.74295932	54.35852644	6.184331694	22.64938602	2.061443898	4.529877203	4.122887796	13.58963161	0.687147966	0	8	528.63	15.5	899.88	13.0558109283447	40.7688941955566
126	8	2010-11-18	1	4	0	16.6666660308838	43.3333320617676	0	60	3	2	207	71	0	1	0	1	1	11	881.3318984	1314.527243	0.687147966	0	0.087382224	0	1	0	4.122887796	0	444.0798154	13.74295932	54.35852644	6.184331694	22.64938602	2.061443898	4.529877203	4.122887796	13.58963161	0.687147966	0	8	528.63	15.5	899.88	13.0558109283447	40.7688941955566
127	8	2010-11-18	2	4	0	30.6666660308838	22.6666660308838	6.66666650772095	60	3	2	207	71	0	1	0	1	1	11	881.3318984	1314.527243	0.687147966	0	0.087382224	0	1	0	4.122887796	0	444.0798154	13.74295932	54.35852644	6.184331694	22.64938602	2.061443898	4.529877203	4.122887796	13.58963161	0.687147966	0	8	528.63	15.5	899.88	13.0558109283447	40.7688941955566
128	8	2010-11-18	3	4	0	41.7999992370605	17.7999992370605	0.400000005960464	60	3	2	207	71	0	1	0	1	1	11	881.3318984	1314.527243	0.687147966	0	0.087382224	0	1	0	4.122887796	0	444.0798154	13.74295932	54.35852644	6.184331694	22.64938602	2.061443898	4.529877203	4.122887796	13.58963161	0.687147966	0	8	528.63	15.5	899.88	13.0558109283447	40.7688941955566
129	8	2010-11-18	4	4	0	36.6666679382324	22.6666660308838	0.666666686534882	60	3	2	207	71	0	1	0	1	1	11	881.3318984	1314.527243	0.687147966	0	0.087382224	0	1	0	4.122887796	0	444.0798154	13.74295932	54.35852644	6.184331694	22.64938602	2.061443898	4.529877203	4.122887796	13.58963161	0.687147966	0	8	528.63	15.5	899.88	13.0558109283447	40.7688941955566
130	8	2010-11-19	0	5	0	33	27	0	60	1	2	207	71	0	1	0	1	1	11	881.3318984	1314.527243	0.687147966	0	0.087382224	0	1	0	4.122887796	0	444.0798154	13.74295932	54.35852644	6.184331694	22.64938602	2.061443898	4.529877203	4.122887796	13.58963161	0.687147966	0	8	528.63	15.5	899.88	13.0558109283447	40.7688941955566
131	8	2010-11-19	1	5	0	20.3333339691162	38.3333320617676	1.33333337306976	60	3	2	207	71	0	1	0	1	1	11	881.3318984	1314.527243	0.687147966	0	0.087382224	0	1	0	4.122887796	0	444.0798154	13.74295932	54.35852644	6.184331694	22.64938602	2.061443898	4.529877203	4.122887796	13.58963161	0.687147966	0	8	528.63	15.5	899.88	13.0558109283447	40.7688941955566
132	8	2010-11-19	2	5	0	44.3333320617676	15.3333330154419	0.333333343267441	60	3	2	207	71	0	1	0	1	1	11	881.3318984	1314.527243	0.687147966	0	0.087382224	0	1	0	4.122887796	0	444.0798154	13.74295932	54.35852644	6.184331694	22.64938602	2.061443898	4.529877203	4.122887796	13.58963161	0.687147966	0	8	528.63	15.5	899.88	13.0558109283447	40.7688941955566
133	8	2010-11-19	3	5	0	42	15.3333330154419	2.66666674613953	60	3	2	207	71	0	1	0	1	1	11	881.3318984	1314.527243	0.687147966	0	0.087382224	0	1	0	4.122887796	0	444.0798154	13.74295932	54.35852644	6.184331694	22.64938602	2.061443898	4.529877203	4.122887796	13.58963161	0.687147966	0	8	528.63	15.5	899.88	13.0558109283447	40.7688941955566
134	8	2010-11-19	4	5	0	38.7999992370605	21.2000007629395	0	60	3	2	207	71	0	1	0	1	1	11	881.3318984	1314.527243	0.687147966	0	0.087382224	0	1	0	4.122887796	0	444.0798154	13.74295932	54.35852644	6.184331694	22.64938602	2.061443898	4.529877203	4.122887796	13.58963161	0.687147966	0	8	528.63	15.5	899.88	13.0558109283447	40.7688941955566
135	8	2010-11-20	0	6	1	28	23	1	52	2	2	207	71	0	1	0	1	1	11	881.3318984	1314.527243	0.687147966	0	0.087382224	0	1	0	4.122887796	0	444.0798154	13.74295932	54.35852644	6.184331694	22.64938602	2.061443898	4.529877203	4.122887796	13.58963161	0.687147966	0	8	528.63	15.5	899.88	13.0558109283447	40.7688941955566
136	8	2010-11-20	1	6	1	33.6666679382324	24.6666660308838	1.66666662693024	60	3	2	207	71	0	1	0	1	1	11	881.3318984	1314.527243	0.687147966	0	0.087382224	0	1	0	4.122887796	0	444.0798154	13.74295932	54.35852644	6.184331694	22.64938602	2.061443898	4.529877203	4.122887796	13.58963161	0.687147966	0	8	528.63	15.5	899.88	13.0558109283447	40.7688941955566
137	8	2010-11-20	2	6	1	32	27.6666660308838	0.333333343267441	60	3	2	207	71	0	1	0	1	1	11	881.3318984	1314.527243	0.687147966	0	0.087382224	0	1	0	4.122887796	0	444.0798154	13.74295932	54.35852644	6.184331694	22.64938602	2.061443898	4.529877203	4.122887796	13.58963161	0.687147966	0	8	528.63	15.5	899.88	13.0558109283447	40.7688941955566
138	8	2010-11-20	3	6	1	39.6666679382324	20	0.333333343267441	60	3	2	207	71	0	1	0	1	1	11	881.3318984	1314.527243	0.687147966	0	0.087382224	0	1	0	4.122887796	0	444.0798154	13.74295932	54.35852644	6.184331694	22.64938602	2.061443898	4.529877203	4.122887796	13.58963161	0.687147966	0	8	528.63	15.5	899.88	13.0558109283447	40.7688941955566
139	8	2010-11-20	4	6	1	34	25	1	60	1	2	207	71	0	1	0	1	1	11	881.3318984	1314.527243	0.687147966	0	0.087382224	0	1	0	4.122887796	0	444.0798154	13.74295932	54.35852644	6.184331694	22.64938602	2.061443898	4.529877203	4.122887796	13.58963161	0.687147966	0	8	528.63	15.5	899.88	13.0558109283447	40.7688941955566
140	10	2010-11-16	0	2	0	26	12.5	0	38.5	2	2	207	69	1	1	1	1	1	12	907.3593828	1234.444667	0.723627363	4.91111611	0.087382224	0.087382224	1	1	5.789018902	9.822232219	380.9483472	15.91980198	58.93339331	6.512646264	24.55558055	2.170882088	4.91111611	4.341764176	14.73334833	0.723627363	0	8	387.38	36.25	909.63	13.7489194869995	44.2000465393066
141	10	2010-11-16	1	2	0	22.3333339691162	34	3.66666674613953	60	3	2	207	69	1	1	1	1	1	12	907.3593828	1234.444667	0.723627363	4.91111611	0.087382224	0.087382224	1	1	5.789018902	9.822232219	380.9483472	15.91980198	58.93339331	6.512646264	24.55558055	2.170882088	4.91111611	4.341764176	14.73334833	0.723627363	0	8	387.38	36.25	909.63	13.7489194869995	44.2000465393066
142	10	2010-11-16	2	2	0	21.6666660308838	35.6666679382324	2.66666674613953	60	3	2	207	69	1	1	1	1	1	12	907.3593828	1234.444667	0.723627363	4.91111611	0.087382224	0.087382224	1	1	5.789018902	9.822232219	380.9483472	15.91980198	58.93339331	6.512646264	24.55558055	2.170882088	4.91111611	4.341764176	14.73334833	0.723627363	0	8	387.38	36.25	909.63	13.7489194869995	44.2000465393066
143	10	2010-11-16	3	2	0	11.3333330154419	46.3333320617676	2.33333325386047	60	3	2	207	69	1	1	1	1	1	12	907.3593828	1234.444667	0.723627363	4.91111611	0.087382224	0.087382224	1	1	5.789018902	9.822232219	380.9483472	15.91980198	58.93339331	6.512646264	24.55558055	2.170882088	4.91111611	4.341764176	14.73334833	0.723627363	0	8	387.38	36.25	909.63	13.7489194869995	44.2000465393066
144	10	2010-11-16	4	2	0	27.3333339691162	32.6666679382324	0	60	3	2	207	69	1	1	1	1	1	12	907.3593828	1234.444667	0.723627363	4.91111611	0.087382224	0.087382224	1	1	5.789018902	9.822232219	380.9483472	15.91980198	58.93339331	6.512646264	24.55558055	2.170882088	4.91111611	4.341764176	14.73334833	0.723627363	0	8	387.38	36.25	909.63	13.7489194869995	44.2000465393066
145	10	2010-11-17	0	3	0	10.5	26.5	0.5	37.5	2	2	207	69	1	1	1	1	1	12	907.3593828	1234.444667	0.723627363	4.91111611	0.087382224	0.087382224	1	1	5.789018902	9.822232219	380.9483472	15.91980198	58.93339331	6.512646264	24.55558055	2.170882088	4.91111611	4.341764176	14.73334833	0.723627363	0	8	387.38	36.25	909.63	13.7489194869995	44.2000465393066
146	10	2010-11-17	1	3	0	19	37.5999984741211	3.40000009536743	60	3	2	207	69	1	1	1	1	1	12	907.3593828	1234.444667	0.723627363	4.91111611	0.087382224	0.087382224	1	1	5.789018902	9.822232219	380.9483472	15.91980198	58.93339331	6.512646264	24.55558055	2.170882088	4.91111611	4.341764176	14.73334833	0.723627363	0	8	387.38	36.25	909.63	13.7489194869995	44.2000465393066
147	10	2010-11-17	2	3	0	21	37.3333320617676	1.66666662693024	60	3	2	207	69	1	1	1	1	1	12	907.3593828	1234.444667	0.723627363	4.91111611	0.087382224	0.087382224	1	1	5.789018902	9.822232219	380.9483472	15.91980198	58.93339331	6.512646264	24.55558055	2.170882088	4.91111611	4.341764176	14.73334833	0.723627363	0	8	387.38	36.25	909.63	13.7489194869995	44.2000465393066
148	10	2010-11-17	3	3	0	16.3333339691162	40	3.66666674613953	60	3	2	207	69	1	1	1	1	1	12	907.3593828	1234.444667	0.723627363	4.91111611	0.087382224	0.087382224	1	1	5.789018902	9.822232219	380.9483472	15.91980198	58.93339331	6.512646264	24.55558055	2.170882088	4.91111611	4.341764176	14.73334833	0.723627363	0	8	387.38	36.25	909.63	13.7489194869995	44.2000465393066
149	10	2010-11-17	4	3	0	35.3333320617676	24.6666660308838	0	60	3	2	207	69	1	1	1	1	1	12	907.3593828	1234.444667	0.723627363	4.91111611	0.087382224	0.087382224	1	1	5.789018902	9.822232219	380.9483472	15.91980198	58.93339331	6.512646264	24.55558055	2.170882088	4.91111611	4.341764176	14.73334833	0.723627363	0	8	387.38	36.25	909.63	13.7489194869995	44.2000465393066
150	10	2010-11-18	0	4	0	8	13	0	21	1	2	207	69	1	1	1	1	1	12	907.3593828	1234.444667	0.723627363	4.91111611	0.087382224	0.087382224	1	1	5.789018902	9.822232219	380.9483472	15.91980198	58.93339331	6.512646264	24.55558055	2.170882088	4.91111611	4.341764176	14.73334833	0.723627363	0	8	387.38	36.25	909.63	13.7489194869995	44.2000465393066
151	10	2010-11-18	1	4	0	15	41.25	3.75	60	3	2	207	69	1	1	1	1	1	12	907.3593828	1234.444667	0.723627363	4.91111611	0.087382224	0.087382224	1	1	5.789018902	9.822232219	380.9483472	15.91980198	58.93339331	6.512646264	24.55558055	2.170882088	4.91111611	4.341764176	14.73334833	0.723627363	0	8	387.38	36.25	909.63	13.7489194869995	44.2000465393066
152	10	2010-11-18	2	4	0	15	40.5999984741211	4.40000009536743	60	3	2	207	69	1	1	1	1	1	12	907.3593828	1234.444667	0.723627363	4.91111611	0.087382224	0.087382224	1	1	5.789018902	9.822232219	380.9483472	15.91980198	58.93339331	6.512646264	24.55558055	2.170882088	4.91111611	4.341764176	14.73334833	0.723627363	0	8	387.38	36.25	909.63	13.7489194869995	44.2000465393066
153	10	2010-11-18	3	4	0	16.3333339691162	35.6666679382324	8	60	3	2	207	69	1	1	1	1	1	12	907.3593828	1234.444667	0.723627363	4.91111611	0.087382224	0.087382224	1	1	5.789018902	9.822232219	380.9483472	15.91980198	58.93339331	6.512646264	24.55558055	2.170882088	4.91111611	4.341764176	14.73334833	0.723627363	0	8	387.38	36.25	909.63	13.7489194869995	44.2000465393066
154	10	2010-11-18	4	4	0	22.3333339691162	37.6666679382324	0	60	3	2	207	69	1	1	1	1	1	12	907.3593828	1234.444667	0.723627363	4.91111611	0.087382224	0.087382224	1	1	5.789018902	9.822232219	380.9483472	15.91980198	58.93339331	6.512646264	24.55558055	2.170882088	4.91111611	4.341764176	14.73334833	0.723627363	0	8	387.38	36.25	909.63	13.7489194869995	44.2000465393066
155	10	2010-11-19	0	5	0	12.3333330154419	20.6666660308838	1.33333337306976	34.3333320617676	3	2	207	69	1	1	1	1	1	12	907.3593828	1234.444667	0.723627363	4.91111611	0.087382224	0.087382224	1	1	5.789018902	9.822232219	380.9483472	15.91980198	58.93339331	6.512646264	24.55558055	2.170882088	4.91111611	4.341764176	14.73334833	0.723627363	0	8	387.38	36.25	909.63	13.7489194869995	44.2000465393066
156	10	2010-11-19	1	5	0	32.3333320617676	26.1666660308838	1.5	60	3	2	207	69	1	1	1	1	1	12	907.3593828	1234.444667	0.723627363	4.91111611	0.087382224	0.087382224	1	1	5.789018902	9.822232219	380.9483472	15.91980198	58.93339331	6.512646264	24.55558055	2.170882088	4.91111611	4.341764176	14.73334833	0.723627363	0	8	387.38	36.25	909.63	13.7489194869995	44.2000465393066
157	10	2010-11-19	2	5	0	23.1666660308838	35.3333320617676	1.5	60	3	2	207	69	1	1	1	1	1	12	907.3593828	1234.444667	0.723627363	4.91111611	0.087382224	0.087382224	1	1	5.789018902	9.822232219	380.9483472	15.91980198	58.93339331	6.512646264	24.55558055	2.170882088	4.91111611	4.341764176	14.73334833	0.723627363	0	8	387.38	36.25	909.63	13.7489194869995	44.2000465393066
158	10	2010-11-19	3	5	0	30.5555553436279	26.6666660308838	2.77777767181396	60	3	2	207	69	1	1	1	1	1	12	907.3593828	1234.444667	0.723627363	4.91111611	0.087382224	0.087382224	1	1	5.789018902	9.822232219	380.9483472	15.91980198	58.93339331	6.512646264	24.55558055	2.170882088	4.91111611	4.341764176	14.73334833	0.723627363	0	8	387.38	36.25	909.63	13.7489194869995	44.2000465393066
159	10	2010-11-19	4	5	0	32	27.8333339691162	0.16666667163372	60	3	2	207	69	1	1	1	1	1	12	907.3593828	1234.444667	0.723627363	4.91111611	0.087382224	0.087382224	1	1	5.789018902	9.822232219	380.9483472	15.91980198	58.93339331	6.512646264	24.55558055	2.170882088	4.91111611	4.341764176	14.73334833	0.723627363	0	8	387.38	36.25	909.63	13.7489194869995	44.2000465393066
160	10	2010-11-20	0	6	1	9.66666698455811	16	0.333333343267441	26	3	2	207	69	1	1	1	1	1	12	907.3593828	1234.444667	0.723627363	4.91111611	0.087382224	0.087382224	1	1	5.789018902	9.822232219	380.9483472	15.91980198	58.93339331	6.512646264	24.55558055	2.170882088	4.91111611	4.341764176	14.73334833	0.723627363	0	8	387.38	36.25	909.63	13.7489194869995	44.2000465393066
161	10	2010-11-20	1	6	1	20.1666660308838	31	8.83333301544189	60	3	2	207	69	1	1	1	1	1	12	907.3593828	1234.444667	0.723627363	4.91111611	0.087382224	0.087382224	1	1	5.789018902	9.822232219	380.9483472	15.91980198	58.93339331	6.512646264	24.55558055	2.170882088	4.91111611	4.341764176	14.73334833	0.723627363	0	8	387.38	36.25	909.63	13.7489194869995	44.2000465393066
162	10	2010-11-20	2	6	1	24.8571434020996	33	2.14285707473755	60	3	2	207	69	1	1	1	1	1	12	907.3593828	1234.444667	0.723627363	4.91111611	0.087382224	0.087382224	1	1	5.789018902	9.822232219	380.9483472	15.91980198	58.93339331	6.512646264	24.55558055	2.170882088	4.91111611	4.341764176	14.73334833	0.723627363	0	8	387.38	36.25	909.63	13.7489194869995	44.2000465393066
163	10	2010-11-20	3	6	1	20.8333339691162	32.8333320617676	6.33333349227905	60	3	2	207	69	1	1	1	1	1	12	907.3593828	1234.444667	0.723627363	4.91111611	0.087382224	0.087382224	1	1	5.789018902	9.822232219	380.9483472	15.91980198	58.93339331	6.512646264	24.55558055	2.170882088	4.91111611	4.341764176	14.73334833	0.723627363	0	8	387.38	36.25	909.63	13.7489194869995	44.2000465393066
164	10	2010-11-20	4	6	1	24.125	35.125	0.75	60	3	2	207	69	1	1	1	1	1	12	907.3593828	1234.444667	0.723627363	4.91111611	0.087382224	0.087382224	1	1	5.789018902	9.822232219	380.9483472	15.91980198	58.93339331	6.512646264	24.55558055	2.170882088	4.91111611	4.341764176	14.73334833	0.723627363	0	8	387.38	36.25	909.63	13.7489194869995	44.2000465393066
165	10	2010-11-21	4	0	1	51	9	0	60	1	2	207	69	1	1	1	1	1	12	907.3593828	1234.444667	0.723627363	4.91111611	0.087382224	0.087382224	1	1	5.789018902	9.822232219	380.9483472	15.91980198	58.93339331	6.512646264	24.55558055	2.170882088	4.91111611	4.341764176	14.73334833	0.723627363	0	8	387.38	36.25	909.63	13.7489194869995	44.2000465393066
166	11	2010-11-21	0	0	1	42	17	1	60	1	2	207	65	1	1	0	1	1	10	905.5895508	1438.075827	1.099087112	0	0.087382224	0	1	0	6.594522672	0	512.7643317	19.78356801	58.68589025	9.891784007	22.00720884	3.297261336	0	5.49543556	7.335736281	1.099087112	0	8	253	26	726.25	19.7835674285889	29.342945098877
167	11	2010-11-21	1	0	1	20.1666660308838	36.6666679382324	1	57.8333320617676	3	2	207	65	1	1	0	1	1	10	905.5895508	1438.075827	1.099087112	0	0.087382224	0	1	0	6.594522672	0	512.7643317	19.78356801	58.68589025	9.891784007	22.00720884	3.297261336	0	5.49543556	7.335736281	1.099087112	0	8	253	26	726.25	19.7835674285889	29.342945098877
168	11	2010-11-21	2	0	1	15	44.6666679382324	0.333333343267441	60	3	2	207	65	1	1	0	1	1	10	905.5895508	1438.075827	1.099087112	0	0.087382224	0	1	0	6.594522672	0	512.7643317	19.78356801	58.68589025	9.891784007	22.00720884	3.297261336	0	5.49543556	7.335736281	1.099087112	0	8	253	26	726.25	19.7835674285889	29.342945098877
169	11	2010-11-21	3	0	1	24	34.3333320617676	1.66666662693024	60	3	2	207	65	1	1	0	1	1	10	905.5895508	1438.075827	1.099087112	0	0.087382224	0	1	0	6.594522672	0	512.7643317	19.78356801	58.68589025	9.891784007	22.00720884	3.297261336	0	5.49543556	7.335736281	1.099087112	0	8	253	26	726.25	19.7835674285889	29.342945098877
170	11	2010-11-21	4	0	1	15	34	0.666666686534882	49.6666679382324	3	2	207	65	1	1	0	1	1	10	905.5895508	1438.075827	1.099087112	0	0.087382224	0	1	0	6.594522672	0	512.7643317	19.78356801	58.68589025	9.891784007	22.00720884	3.297261336	0	5.49543556	7.335736281	1.099087112	0	8	253	26	726.25	19.7835674285889	29.342945098877
171	11	2010-11-22	0	1	0	38	0	0	38	1	2	207	65	1	1	0	1	1	10	905.5895508	1438.075827	1.099087112	0	0.087382224	0	1	0	6.594522672	0	512.7643317	19.78356801	58.68589025	9.891784007	22.00720884	3.297261336	0	5.49543556	7.335736281	1.099087112	0	8	253	26	726.25	19.7835674285889	29.342945098877
172	11	2010-11-22	1	1	0	18.6666660308838	39.3333320617676	2	60	3	2	207	65	1	1	0	1	1	10	905.5895508	1438.075827	1.099087112	0	0.087382224	0	1	0	6.594522672	0	512.7643317	19.78356801	58.68589025	9.891784007	22.00720884	3.297261336	0	5.49543556	7.335736281	1.099087112	0	8	253	26	726.25	19.7835674285889	29.342945098877
173	11	2010-11-22	2	1	0	8.33333301544189	50.3333320617676	1.33333337306976	60	3	2	207	65	1	1	0	1	1	10	905.5895508	1438.075827	1.099087112	0	0.087382224	0	1	0	6.594522672	0	512.7643317	19.78356801	58.68589025	9.891784007	22.00720884	3.297261336	0	5.49543556	7.335736281	1.099087112	0	8	253	26	726.25	19.7835674285889	29.342945098877
174	11	2010-11-22	3	1	0	17.3999996185303	40.7999992370605	1.79999995231628	60	3	2	207	65	1	1	0	1	1	10	905.5895508	1438.075827	1.099087112	0	0.087382224	0	1	0	6.594522672	0	512.7643317	19.78356801	58.68589025	9.891784007	22.00720884	3.297261336	0	5.49543556	7.335736281	1.099087112	0	8	253	26	726.25	19.7835674285889	29.342945098877
175	11	2010-11-22	4	1	0	22.6666660308838	26	0.666666686534882	49.3333320617676	3	2	207	65	1	1	0	1	1	10	905.5895508	1438.075827	1.099087112	0	0.087382224	0	1	0	6.594522672	0	512.7643317	19.78356801	58.68589025	9.891784007	22.00720884	3.297261336	0	5.49543556	7.335736281	1.099087112	0	8	253	26	726.25	19.7835674285889	29.342945098877
176	11	2010-11-23	1	2	0	7	45.75	0.25	53	3	2	207	65	1	1	0	1	1	10	905.5895508	1438.075827	1.099087112	0	0.087382224	0	1	0	6.594522672	0	512.7643317	19.78356801	58.68589025	9.891784007	22.00720884	3.297261336	0	5.49543556	7.335736281	1.099087112	0	8	253	26	726.25	19.7835674285889	29.342945098877
177	11	2010-11-23	2	2	0	13	35.6666679382324	11.3333330154419	60	3	2	207	65	1	1	0	1	1	10	905.5895508	1438.075827	1.099087112	0	0.087382224	0	1	0	6.594522672	0	512.7643317	19.78356801	58.68589025	9.891784007	22.00720884	3.297261336	0	5.49543556	7.335736281	1.099087112	0	8	253	26	726.25	19.7835674285889	29.342945098877
178	11	2010-11-23	3	2	0	11.5	44	4.5	60	3	2	207	65	1	1	0	1	1	10	905.5895508	1438.075827	1.099087112	0	0.087382224	0	1	0	6.594522672	0	512.7643317	19.78356801	58.68589025	9.891784007	22.00720884	3.297261336	0	5.49543556	7.335736281	1.099087112	0	8	253	26	726.25	19.7835674285889	29.342945098877
179	11	2010-11-23	4	2	0	9.83333301544189	45.5	1.33333337306976	56.6666679382324	3	2	207	65	1	1	0	1	1	10	905.5895508	1438.075827	1.099087112	0	0.087382224	0	1	0	6.594522672	0	512.7643317	19.78356801	58.68589025	9.891784007	22.00720884	3.297261336	0	5.49543556	7.335736281	1.099087112	0	8	253	26	726.25	19.7835674285889	29.342945098877
180	11	2010-11-24	0	3	0	22	14	3	39	1	2	207	65	1	1	0	1	1	10	905.5895508	1438.075827	1.099087112	0	0.087382224	0	1	0	6.594522672	0	512.7643317	19.78356801	58.68589025	9.891784007	22.00720884	3.297261336	0	5.49543556	7.335736281	1.099087112	0	8	253	26	726.25	19.7835674285889	29.342945098877
181	11	2010-11-24	1	3	0	5.25	51.75	3	60	3	2	207	65	1	1	0	1	1	10	905.5895508	1438.075827	1.099087112	0	0.087382224	0	1	0	6.594522672	0	512.7643317	19.78356801	58.68589025	9.891784007	22.00720884	3.297261336	0	5.49543556	7.335736281	1.099087112	0	8	253	26	726.25	19.7835674285889	29.342945098877
182	11	2010-11-24	2	3	0	9.60000038146973	48.2000007629395	2.20000004768372	60	3	2	207	65	1	1	0	1	1	10	905.5895508	1438.075827	1.099087112	0	0.087382224	0	1	0	6.594522672	0	512.7643317	19.78356801	58.68589025	9.891784007	22.00720884	3.297261336	0	5.49543556	7.335736281	1.099087112	0	8	253	26	726.25	19.7835674285889	29.342945098877
183	11	2010-11-24	3	3	0	3.33333325386047	43.6666679382324	13	60	3	2	207	65	1	1	0	1	1	10	905.5895508	1438.075827	1.099087112	0	0.087382224	0	1	0	6.594522672	0	512.7643317	19.78356801	58.68589025	9.891784007	22.00720884	3.297261336	0	5.49543556	7.335736281	1.099087112	0	8	253	26	726.25	19.7835674285889	29.342945098877
184	11	2010-11-24	4	3	0	6	47	1	54	3	2	207	65	1	1	0	1	1	10	905.5895508	1438.075827	1.099087112	0	0.087382224	0	1	0	6.594522672	0	512.7643317	19.78356801	58.68589025	9.891784007	22.00720884	3.297261336	0	5.49543556	7.335736281	1.099087112	0	8	253	26	726.25	19.7835674285889	29.342945098877
185	11	2010-11-25	1	4	0	11.5	47	0	58.5	2	2	207	65	1	1	0	1	1	10	905.5895508	1438.075827	1.099087112	0	0.087382224	0	1	0	6.594522672	0	512.7643317	19.78356801	58.68589025	9.891784007	22.00720884	3.297261336	0	5.49543556	7.335736281	1.099087112	0	8	253	26	726.25	19.7835674285889	29.342945098877
186	11	2010-11-25	2	4	0	24.75	34.25	1	60	3	2	207	65	1	1	0	1	1	10	905.5895508	1438.075827	1.099087112	0	0.087382224	0	1	0	6.594522672	0	512.7643317	19.78356801	58.68589025	9.891784007	22.00720884	3.297261336	0	5.49543556	7.335736281	1.099087112	0	8	253	26	726.25	19.7835674285889	29.342945098877
187	11	2010-11-25	3	4	0	30.6666660308838	29.1666660308838	0.16666667163372	60	3	2	207	65	1	1	0	1	1	10	905.5895508	1438.075827	1.099087112	0	0.087382224	0	1	0	6.594522672	0	512.7643317	19.78356801	58.68589025	9.891784007	22.00720884	3.297261336	0	5.49543556	7.335736281	1.099087112	0	8	253	26	726.25	19.7835674285889	29.342945098877
188	11	2010-11-25	4	4	0	32	27.6666660308838	0.333333343267441	60	3	2	207	65	1	1	0	1	1	10	905.5895508	1438.075827	1.099087112	0	0.087382224	0	1	0	6.594522672	0	512.7643317	19.78356801	58.68589025	9.891784007	22.00720884	3.297261336	0	5.49543556	7.335736281	1.099087112	0	8	253	26	726.25	19.7835674285889	29.342945098877
189	11	2010-11-26	1	5	0	9	1	0	10	1	2	207	65	1	1	0	1	1	10	905.5895508	1438.075827	1.099087112	0	0.087382224	0	1	0	6.594522672	0	512.7643317	19.78356801	58.68589025	9.891784007	22.00720884	3.297261336	0	5.49543556	7.335736281	1.099087112	0	8	253	26	726.25	19.7835674285889	29.342945098877
190	11	2010-11-26	2	5	0	53.6666679382324	4	2.33333325386047	60	3	2	207	65	1	1	0	1	1	10	905.5895508	1438.075827	1.099087112	0	0.087382224	0	1	0	6.594522672	0	512.7643317	19.78356801	58.68589025	9.891784007	22.00720884	3.297261336	0	5.49543556	7.335736281	1.099087112	0	8	253	26	726.25	19.7835674285889	29.342945098877
191	11	2010-11-26	3	5	0	44.3333320617676	11.6666669845581	4	60	3	2	207	65	1	1	0	1	1	10	905.5895508	1438.075827	1.099087112	0	0.087382224	0	1	0	6.594522672	0	512.7643317	19.78356801	58.68589025	9.891784007	22.00720884	3.297261336	0	5.49543556	7.335736281	1.099087112	0	8	253	26	726.25	19.7835674285889	29.342945098877
192	11	2010-11-26	4	5	0	35.8333320617676	22.5	1.66666662693024	60	3	2	207	65	1	1	0	1	1	10	905.5895508	1438.075827	1.099087112	0	0.087382224	0	1	0	6.594522672	0	512.7643317	19.78356801	58.68589025	9.891784007	22.00720884	3.297261336	0	5.49543556	7.335736281	1.099087112	0	8	253	26	726.25	19.7835674285889	29.342945098877
193	12	2010-11-13	0	6	1	5	29	1	35	1	2	207	78	1	0	1	1	1	11	900.4003243	1487.145876	0.914130501	0	0.087382224	0	1	0	5.484783008	0	442.0247934	16.45434902	55.27968473	8.227174512	24.56874877	2.742391504	0	4.570652507	6.142187192	0.914130501	0	7	419.57	94.71	941.29	16.4543495178223	30.7109355926514
194	12	2010-11-13	1	6	1	8	22	30	60	3	2	207	78	1	0	1	1	1	11	900.4003243	1487.145876	0.914130501	0	0.087382224	0	1	0	5.484783008	0	442.0247934	16.45434902	55.27968473	8.227174512	24.56874877	2.742391504	0	4.570652507	6.142187192	0.914130501	0	7	419.57	94.71	941.29	16.4543495178223	30.7109355926514
195	12	2010-11-13	2	6	1	19.3333339691162	17.3333339691162	23.3333339691162	60	3	2	207	78	1	0	1	1	1	11	900.4003243	1487.145876	0.914130501	0	0.087382224	0	1	0	5.484783008	0	442.0247934	16.45434902	55.27968473	8.227174512	24.56874877	2.742391504	0	4.570652507	6.142187192	0.914130501	0	7	419.57	94.71	941.29	16.4543495178223	30.7109355926514
196	12	2010-11-13	3	6	1	47	13	0	60	3	2	207	78	1	0	1	1	1	11	900.4003243	1487.145876	0.914130501	0	0.087382224	0	1	0	5.484783008	0	442.0247934	16.45434902	55.27968473	8.227174512	24.56874877	2.742391504	0	4.570652507	6.142187192	0.914130501	0	7	419.57	94.71	941.29	16.4543495178223	30.7109355926514
197	12	2010-11-13	4	6	1	31.3333339691162	27.6666660308838	1	60	3	2	207	78	1	0	1	1	1	11	900.4003243	1487.145876	0.914130501	0	0.087382224	0	1	0	5.484783008	0	442.0247934	16.45434902	55.27968473	8.227174512	24.56874877	2.742391504	0	4.570652507	6.142187192	0.914130501	0	7	419.57	94.71	941.29	16.4543495178223	30.7109355926514
198	12	2010-11-14	0	0	1	9.5	32	7.5	49	2	2	207	78	1	0	1	1	1	11	900.4003243	1487.145876	0.914130501	0	0.087382224	0	1	0	5.484783008	0	442.0247934	16.45434902	55.27968473	8.227174512	24.56874877	2.742391504	0	4.570652507	6.142187192	0.914130501	0	7	419.57	94.71	941.29	16.4543495178223	30.7109355926514
199	12	2010-11-14	1	0	1	0	6	54	60	1	2	207	78	1	0	1	1	1	11	900.4003243	1487.145876	0.914130501	0	0.087382224	0	1	0	5.484783008	0	442.0247934	16.45434902	55.27968473	8.227174512	24.56874877	2.742391504	0	4.570652507	6.142187192	0.914130501	0	7	419.57	94.71	941.29	16.4543495178223	30.7109355926514
200	12	2010-11-14	2	0	1	1	33.6666679382324	25.3333339691162	60	3	2	207	78	1	0	1	1	1	11	900.4003243	1487.145876	0.914130501	0	0.087382224	0	1	0	5.484783008	0	442.0247934	16.45434902	55.27968473	8.227174512	24.56874877	2.742391504	0	4.570652507	6.142187192	0.914130501	0	7	419.57	94.71	941.29	16.4543495178223	30.7109355926514
201	12	2010-11-14	3	0	1	25.6666660308838	27.3333339691162	7	60	3	2	207	78	1	0	1	1	1	11	900.4003243	1487.145876	0.914130501	0	0.087382224	0	1	0	5.484783008	0	442.0247934	16.45434902	55.27968473	8.227174512	24.56874877	2.742391504	0	4.570652507	6.142187192	0.914130501	0	7	419.57	94.71	941.29	16.4543495178223	30.7109355926514
202	12	2010-11-14	4	0	1	20	40	0	60	3	2	207	78	1	0	1	1	1	11	900.4003243	1487.145876	0.914130501	0	0.087382224	0	1	0	5.484783008	0	442.0247934	16.45434902	55.27968473	8.227174512	24.56874877	2.742391504	0	4.570652507	6.142187192	0.914130501	0	7	419.57	94.71	941.29	16.4543495178223	30.7109355926514
203	12	2010-11-15	0	1	0	19	23	1	43	1	2	207	78	1	0	1	1	1	11	900.4003243	1487.145876	0.914130501	0	0.087382224	0	1	0	5.484783008	0	442.0247934	16.45434902	55.27968473	8.227174512	24.56874877	2.742391504	0	4.570652507	6.142187192	0.914130501	0	7	419.57	94.71	941.29	16.4543495178223	30.7109355926514
204	12	2010-11-15	1	1	0	11.6666669845581	28.6666660308838	19.6666660308838	60	3	2	207	78	1	0	1	1	1	11	900.4003243	1487.145876	0.914130501	0	0.087382224	0	1	0	5.484783008	0	442.0247934	16.45434902	55.27968473	8.227174512	24.56874877	2.742391504	0	4.570652507	6.142187192	0.914130501	0	7	419.57	94.71	941.29	16.4543495178223	30.7109355926514
205	12	2010-11-15	2	1	0	18.6666660308838	37.3333320617676	4	60	3	2	207	78	1	0	1	1	1	11	900.4003243	1487.145876	0.914130501	0	0.087382224	0	1	0	5.484783008	0	442.0247934	16.45434902	55.27968473	8.227174512	24.56874877	2.742391504	0	4.570652507	6.142187192	0.914130501	0	7	419.57	94.71	941.29	16.4543495178223	30.7109355926514
206	12	2010-11-15	3	1	0	16.3333339691162	38.3333320617676	5.33333349227905	60	3	2	207	78	1	0	1	1	1	11	900.4003243	1487.145876	0.914130501	0	0.087382224	0	1	0	5.484783008	0	442.0247934	16.45434902	55.27968473	8.227174512	24.56874877	2.742391504	0	4.570652507	6.142187192	0.914130501	0	7	419.57	94.71	941.29	16.4543495178223	30.7109355926514
207	12	2010-11-15	4	1	0	25	33.6666679382324	1.33333337306976	60	3	2	207	78	1	0	1	1	1	11	900.4003243	1487.145876	0.914130501	0	0.087382224	0	1	0	5.484783008	0	442.0247934	16.45434902	55.27968473	8.227174512	24.56874877	2.742391504	0	4.570652507	6.142187192	0.914130501	0	7	419.57	94.71	941.29	16.4543495178223	30.7109355926514
208	12	2010-11-16	0	2	0	13.5	16	1.5	31	2	2	207	78	1	0	1	1	1	11	900.4003243	1487.145876	0.914130501	0	0.087382224	0	1	0	5.484783008	0	442.0247934	16.45434902	55.27968473	8.227174512	24.56874877	2.742391504	0	4.570652507	6.142187192	0.914130501	0	7	419.57	94.71	941.29	16.4543495178223	30.7109355926514
209	12	2010-11-16	1	2	0	8	42	10	60	3	2	207	78	1	0	1	1	1	11	900.4003243	1487.145876	0.914130501	0	0.087382224	0	1	0	5.484783008	0	442.0247934	16.45434902	55.27968473	8.227174512	24.56874877	2.742391504	0	4.570652507	6.142187192	0.914130501	0	7	419.57	94.71	941.29	16.4543495178223	30.7109355926514
210	12	2010-11-16	2	2	0	34.6666679382324	21.3333339691162	4	60	3	2	207	78	1	0	1	1	1	11	900.4003243	1487.145876	0.914130501	0	0.087382224	0	1	0	5.484783008	0	442.0247934	16.45434902	55.27968473	8.227174512	24.56874877	2.742391504	0	4.570652507	6.142187192	0.914130501	0	7	419.57	94.71	941.29	16.4543495178223	30.7109355926514
211	12	2010-11-16	3	2	0	52	6	2	60	3	2	207	78	1	0	1	1	1	11	900.4003243	1487.145876	0.914130501	0	0.087382224	0	1	0	5.484783008	0	442.0247934	16.45434902	55.27968473	8.227174512	24.56874877	2.742391504	0	4.570652507	6.142187192	0.914130501	0	7	419.57	94.71	941.29	16.4543495178223	30.7109355926514
212	12	2010-11-16	4	2	0	41.3333320617676	16.3333339691162	2.33333325386047	60	3	2	207	78	1	0	1	1	1	11	900.4003243	1487.145876	0.914130501	0	0.087382224	0	1	0	5.484783008	0	442.0247934	16.45434902	55.27968473	8.227174512	24.56874877	2.742391504	0	4.570652507	6.142187192	0.914130501	0	7	419.57	94.71	941.29	16.4543495178223	30.7109355926514
213	12	2010-11-19	0	5	0	9	42	4	55	1	2	207	78	1	0	1	1	1	11	900.4003243	1487.145876	0.914130501	0	0.087382224	0	1	0	5.484783008	0	442.0247934	16.45434902	55.27968473	8.227174512	24.56874877	2.742391504	0	4.570652507	6.142187192	0.914130501	0	7	419.57	94.71	941.29	16.4543495178223	30.7109355926514
214	12	2010-11-19	1	5	0	34.5	18.5	7	60	2	2	207	78	1	0	1	1	1	11	900.4003243	1487.145876	0.914130501	0	0.087382224	0	1	0	5.484783008	0	442.0247934	16.45434902	55.27968473	8.227174512	24.56874877	2.742391504	0	4.570652507	6.142187192	0.914130501	0	7	419.57	94.71	941.29	16.4543495178223	30.7109355926514
215	12	2010-11-19	2	5	0	22	31	7	60	3	2	207	78	1	0	1	1	1	11	900.4003243	1487.145876	0.914130501	0	0.087382224	0	1	0	5.484783008	0	442.0247934	16.45434902	55.27968473	8.227174512	24.56874877	2.742391504	0	4.570652507	6.142187192	0.914130501	0	7	419.57	94.71	941.29	16.4543495178223	30.7109355926514
216	12	2010-11-19	3	5	0	43	16.6666660308838	0.333333343267441	60	3	2	207	78	1	0	1	1	1	11	900.4003243	1487.145876	0.914130501	0	0.087382224	0	1	0	5.484783008	0	442.0247934	16.45434902	55.27968473	8.227174512	24.56874877	2.742391504	0	4.570652507	6.142187192	0.914130501	0	7	419.57	94.71	941.29	16.4543495178223	30.7109355926514
217	12	2010-11-19	4	5	0	6.33333349227905	53.6666679382324	0	60	3	2	207	78	1	0	1	1	1	11	900.4003243	1487.145876	0.914130501	0	0.087382224	0	1	0	5.484783008	0	442.0247934	16.45434902	55.27968473	8.227174512	24.56874877	2.742391504	0	4.570652507	6.142187192	0.914130501	0	7	419.57	94.71	941.29	16.4543495178223	30.7109355926514
218	12	2010-11-20	0	6	1	8	22	0	30	1	2	207	78	1	0	1	1	1	11	900.4003243	1487.145876	0.914130501	0	0.087382224	0	1	0	5.484783008	0	442.0247934	16.45434902	55.27968473	8.227174512	24.56874877	2.742391504	0	4.570652507	6.142187192	0.914130501	0	7	419.57	94.71	941.29	16.4543495178223	30.7109355926514
219	12	2010-11-20	1	6	1	31.8333339691162	25.8333339691162	2.33333325386047	60	3	2	207	78	1	0	1	1	1	11	900.4003243	1487.145876	0.914130501	0	0.087382224	0	1	0	5.484783008	0	442.0247934	16.45434902	55.27968473	8.227174512	24.56874877	2.742391504	0	4.570652507	6.142187192	0.914130501	0	7	419.57	94.71	941.29	16.4543495178223	30.7109355926514
220	12	2010-11-20	2	6	1	38.3333320617676	18.3333339691162	3.33333325386047	60	3	2	207	78	1	0	1	1	1	11	900.4003243	1487.145876	0.914130501	0	0.087382224	0	1	0	5.484783008	0	442.0247934	16.45434902	55.27968473	8.227174512	24.56874877	2.742391504	0	4.570652507	6.142187192	0.914130501	0	7	419.57	94.71	941.29	16.4543495178223	30.7109355926514
221	12	2010-11-20	3	6	1	49.6666679382324	7.33333349227905	3	60	3	2	207	78	1	0	1	1	1	11	900.4003243	1487.145876	0.914130501	0	0.087382224	0	1	0	5.484783008	0	442.0247934	16.45434902	55.27968473	8.227174512	24.56874877	2.742391504	0	4.570652507	6.142187192	0.914130501	0	7	419.57	94.71	941.29	16.4543495178223	30.7109355926514
222	12	2010-11-20	4	6	1	10	47.3333320617676	2.66666674613953	60	3	2	207	78	1	0	1	1	1	11	900.4003243	1487.145876	0.914130501	0	0.087382224	0	1	0	5.484783008	0	442.0247934	16.45434902	55.27968473	8.227174512	24.56874877	2.742391504	0	4.570652507	6.142187192	0.914130501	0	7	419.57	94.71	941.29	16.4543495178223	30.7109355926514
223	12	2010-11-21	2	0	1	31.3333339691162	25.3333339691162	3.33333325386047	60	3	2	207	78	1	0	1	1	1	11	900.4003243	1487.145876	0.914130501	0	0.087382224	0	1	0	5.484783008	0	442.0247934	16.45434902	55.27968473	8.227174512	24.56874877	2.742391504	0	4.570652507	6.142187192	0.914130501	0	7	419.57	94.71	941.29	16.4543495178223	30.7109355926514
224	12	2010-11-21	3	0	1	25.6666660308838	31.6666660308838	2.66666674613953	60	3	2	207	78	1	0	1	1	1	11	900.4003243	1487.145876	0.914130501	0	0.087382224	0	1	0	5.484783008	0	442.0247934	16.45434902	55.27968473	8.227174512	24.56874877	2.742391504	0	4.570652507	6.142187192	0.914130501	0	7	419.57	94.71	941.29	16.4543495178223	30.7109355926514
225	12	2010-11-21	4	0	1	40	20	0	60	3	2	207	78	1	0	1	1	1	11	900.4003243	1487.145876	0.914130501	0	0.087382224	0	1	0	5.484783008	0	442.0247934	16.45434902	55.27968473	8.227174512	24.56874877	2.742391504	0	4.570652507	6.142187192	0.914130501	0	7	419.57	94.71	941.29	16.4543495178223	30.7109355926514
226	12	2010-11-26	0	5	0	32	27	1	60	1	2	207	78	1	0	1	1	1	11	900.4003243	1487.145876	0.914130501	0	0.087382224	0	1	0	5.484783008	0	442.0247934	16.45434902	55.27968473	8.227174512	24.56874877	2.742391504	0	4.570652507	6.142187192	0.914130501	0	7	419.57	94.71	941.29	16.4543495178223	30.7109355926514
227	12	2010-11-26	1	5	0	6	40	14	60	1	2	207	78	1	0	1	1	1	11	900.4003243	1487.145876	0.914130501	0	0.087382224	0	1	0	5.484783008	0	442.0247934	16.45434902	55.27968473	8.227174512	24.56874877	2.742391504	0	4.570652507	6.142187192	0.914130501	0	7	419.57	94.71	941.29	16.4543495178223	30.7109355926514
228	14	2010-11-21	0	0	1	7	4	0	11	1	2	207	72	1	1	0	1	1	9	879.5047608	1090.12904	0.689521342	0	0.087382224	0	1	0	4.137128055	4.026808167	351.5420099	14.47994819	28.18765717	6.205692082	12.0804245	2.068564027	12.0804245	3.447606712	8.053616334	0	0	8	370.5	44.5	852.38	11.7218627929688	32.2144660949707
229	14	2010-11-21	1	0	1	52.6666679382324	5.33333349227905	2	60	3	2	207	72	1	1	0	1	1	9	879.5047608	1090.12904	0.689521342	0	0.087382224	0	1	0	4.137128055	4.026808167	351.5420099	14.47994819	28.18765717	6.205692082	12.0804245	2.068564027	12.0804245	3.447606712	8.053616334	0	0	8	370.5	44.5	852.38	11.7218627929688	32.2144660949707
230	14	2010-11-25	0	4	0	46	13	1	60	1	2	207	72	1	1	0	1	1	9	879.5047608	1090.12904	0.689521342	0	0.087382224	0	1	0	4.137128055	4.026808167	351.5420099	14.47994819	28.18765717	6.205692082	12.0804245	2.068564027	12.0804245	3.447606712	8.053616334	0	0	8	370.5	44.5	852.38	11.7218627929688	32.2144660949707
231	14	2010-11-25	1	4	0	9	43	8	60	3	2	207	72	1	1	0	1	1	9	879.5047608	1090.12904	0.689521342	0	0.087382224	0	1	0	4.137128055	4.026808167	351.5420099	14.47994819	28.18765717	6.205692082	12.0804245	2.068564027	12.0804245	3.447606712	8.053616334	0	0	8	370.5	44.5	852.38	11.7218627929688	32.2144660949707
232	14	2010-11-25	2	4	0	35	20	5	60	3	2	207	72	1	1	0	1	1	9	879.5047608	1090.12904	0.689521342	0	0.087382224	0	1	0	4.137128055	4.026808167	351.5420099	14.47994819	28.18765717	6.205692082	12.0804245	2.068564027	12.0804245	3.447606712	8.053616334	0	0	8	370.5	44.5	852.38	11.7218627929688	32.2144660949707
233	14	2010-11-25	3	4	0	33.3333320617676	20.3333339691162	6.33333349227905	60	3	2	207	72	1	1	0	1	1	9	879.5047608	1090.12904	0.689521342	0	0.087382224	0	1	0	4.137128055	4.026808167	351.5420099	14.47994819	28.18765717	6.205692082	12.0804245	2.068564027	12.0804245	3.447606712	8.053616334	0	0	8	370.5	44.5	852.38	11.7218627929688	32.2144660949707
234	14	2010-11-25	4	4	0	19	13.5	1	33.5	2	2	207	72	1	1	0	1	1	9	879.5047608	1090.12904	0.689521342	0	0.087382224	0	1	0	4.137128055	4.026808167	351.5420099	14.47994819	28.18765717	6.205692082	12.0804245	2.068564027	12.0804245	3.447606712	8.053616334	0	0	8	370.5	44.5	852.38	11.7218627929688	32.2144660949707
235	14	2011-02-19	0	6	1	15	36	5	56	1	2	207	72	1	1	0	1	1	9	879.5047608	1090.12904	0.689521342	0	0.087382224	0	1	0	4.137128055	4.026808167	351.5420099	14.47994819	28.18765717	6.205692082	12.0804245	2.068564027	12.0804245	3.447606712	8.053616334	0	0	8	370.5	44.5	852.38	11.7218627929688	32.2144660949707
236	14	2011-02-19	1	6	1	16.3333339691162	42.6666679382324	1	60	3	2	207	72	1	1	0	1	1	9	879.5047608	1090.12904	0.689521342	0	0.087382224	0	1	0	4.137128055	4.026808167	351.5420099	14.47994819	28.18765717	6.205692082	12.0804245	2.068564027	12.0804245	3.447606712	8.053616334	0	0	8	370.5	44.5	852.38	11.7218627929688	32.2144660949707
237	14	2011-02-19	2	6	1	10.3999996185303	43	6.59999990463257	60	3	2	207	72	1	1	0	1	1	9	879.5047608	1090.12904	0.689521342	0	0.087382224	0	1	0	4.137128055	4.026808167	351.5420099	14.47994819	28.18765717	6.205692082	12.0804245	2.068564027	12.0804245	3.447606712	8.053616334	0	0	8	370.5	44.5	852.38	11.7218627929688	32.2144660949707
238	14	2011-02-19	3	6	1	21.75	37	1.25	60	3	2	207	72	1	1	0	1	1	9	879.5047608	1090.12904	0.689521342	0	0.087382224	0	1	0	4.137128055	4.026808167	351.5420099	14.47994819	28.18765717	6.205692082	12.0804245	2.068564027	12.0804245	3.447606712	8.053616334	0	0	8	370.5	44.5	852.38	11.7218627929688	32.2144660949707
239	14	2011-02-19	4	6	1	26.6666660308838	33	0.333333343267441	60	3	2	207	72	1	1	0	1	1	9	879.5047608	1090.12904	0.689521342	0	0.087382224	0	1	0	4.137128055	4.026808167	351.5420099	14.47994819	28.18765717	6.205692082	12.0804245	2.068564027	12.0804245	3.447606712	8.053616334	0	0	8	370.5	44.5	852.38	11.7218627929688	32.2144660949707
240	14	2011-02-20	0	0	1	26	26	5	57	1	2	207	72	1	1	0	1	1	9	879.5047608	1090.12904	0.689521342	0	0.087382224	0	1	0	4.137128055	4.026808167	351.5420099	14.47994819	28.18765717	6.205692082	12.0804245	2.068564027	12.0804245	3.447606712	8.053616334	0	0	8	370.5	44.5	852.38	11.7218627929688	32.2144660949707
241	14	2011-02-20	1	0	1	2	40.6666679382324	17.3333339691162	60	3	2	207	72	1	1	0	1	1	9	879.5047608	1090.12904	0.689521342	0	0.087382224	0	1	0	4.137128055	4.026808167	351.5420099	14.47994819	28.18765717	6.205692082	12.0804245	2.068564027	12.0804245	3.447606712	8.053616334	0	0	8	370.5	44.5	852.38	11.7218627929688	32.2144660949707
242	14	2011-02-20	2	0	1	31.6666660308838	23.6666660308838	4.66666650772095	60	3	2	207	72	1	1	0	1	1	9	879.5047608	1090.12904	0.689521342	0	0.087382224	0	1	0	4.137128055	4.026808167	351.5420099	14.47994819	28.18765717	6.205692082	12.0804245	2.068564027	12.0804245	3.447606712	8.053616334	0	0	8	370.5	44.5	852.38	11.7218627929688	32.2144660949707
243	14	2011-02-20	3	0	1	19	39.5999984741211	1.39999997615814	60	3	2	207	72	1	1	0	1	1	9	879.5047608	1090.12904	0.689521342	0	0.087382224	0	1	0	4.137128055	4.026808167	351.5420099	14.47994819	28.18765717	6.205692082	12.0804245	2.068564027	12.0804245	3.447606712	8.053616334	0	0	8	370.5	44.5	852.38	11.7218627929688	32.2144660949707
244	14	2011-02-20	4	0	1	28.3999996185303	30.7999992370605	0.800000011920929	60	3	2	207	72	1	1	0	1	1	9	879.5047608	1090.12904	0.689521342	0	0.087382224	0	1	0	4.137128055	4.026808167	351.5420099	14.47994819	28.18765717	6.205692082	12.0804245	2.068564027	12.0804245	3.447606712	8.053616334	0	0	8	370.5	44.5	852.38	11.7218627929688	32.2144660949707
245	14	2011-02-21	0	1	0	11	32.6666679382324	4	47.6666679382324	3	2	207	72	1	1	0	1	1	9	879.5047608	1090.12904	0.689521342	0	0.087382224	0	1	0	4.137128055	4.026808167	351.5420099	14.47994819	28.18765717	6.205692082	12.0804245	2.068564027	12.0804245	3.447606712	8.053616334	0	0	8	370.5	44.5	852.38	11.7218627929688	32.2144660949707
246	14	2011-02-21	1	1	0	20.6666660308838	37.6666679382324	1.66666662693024	60	3	2	207	72	1	1	0	1	1	9	879.5047608	1090.12904	0.689521342	0	0.087382224	0	1	0	4.137128055	4.026808167	351.5420099	14.47994819	28.18765717	6.205692082	12.0804245	2.068564027	12.0804245	3.447606712	8.053616334	0	0	8	370.5	44.5	852.38	11.7218627929688	32.2144660949707
247	14	2011-02-21	2	1	0	12.3333330154419	40.3333320617676	7.33333349227905	60	3	2	207	72	1	1	0	1	1	9	879.5047608	1090.12904	0.689521342	0	0.087382224	0	1	0	4.137128055	4.026808167	351.5420099	14.47994819	28.18765717	6.205692082	12.0804245	2.068564027	12.0804245	3.447606712	8.053616334	0	0	8	370.5	44.5	852.38	11.7218627929688	32.2144660949707
248	14	2011-02-21	3	1	0	14	41.3333320617676	4.66666650772095	60	3	2	207	72	1	1	0	1	1	9	879.5047608	1090.12904	0.689521342	0	0.087382224	0	1	0	4.137128055	4.026808167	351.5420099	14.47994819	28.18765717	6.205692082	12.0804245	2.068564027	12.0804245	3.447606712	8.053616334	0	0	8	370.5	44.5	852.38	11.7218627929688	32.2144660949707
249	14	2011-02-21	4	1	0	39	20.25	0.75	60	3	2	207	72	1	1	0	1	1	9	879.5047608	1090.12904	0.689521342	0	0.087382224	0	1	0	4.137128055	4.026808167	351.5420099	14.47994819	28.18765717	6.205692082	12.0804245	2.068564027	12.0804245	3.447606712	8.053616334	0	0	8	370.5	44.5	852.38	11.7218627929688	32.2144660949707
250	14	2011-02-22	0	2	0	21.5	24	0.5	46	2	2	207	72	1	1	0	1	1	9	879.5047608	1090.12904	0.689521342	0	0.087382224	0	1	0	4.137128055	4.026808167	351.5420099	14.47994819	28.18765717	6.205692082	12.0804245	2.068564027	12.0804245	3.447606712	8.053616334	0	0	8	370.5	44.5	852.38	11.7218627929688	32.2144660949707
251	14	2011-02-22	1	2	0	10.1999998092651	45.2000007629395	4.59999990463257	60	3	2	207	72	1	1	0	1	1	9	879.5047608	1090.12904	0.689521342	0	0.087382224	0	1	0	4.137128055	4.026808167	351.5420099	14.47994819	28.18765717	6.205692082	12.0804245	2.068564027	12.0804245	3.447606712	8.053616334	0	0	8	370.5	44.5	852.38	11.7218627929688	32.2144660949707
252	14	2011-02-22	2	2	0	16.3333339691162	41.6666679382324	2	60	3	2	207	72	1	1	0	1	1	9	879.5047608	1090.12904	0.689521342	0	0.087382224	0	1	0	4.137128055	4.026808167	351.5420099	14.47994819	28.18765717	6.205692082	12.0804245	2.068564027	12.0804245	3.447606712	8.053616334	0	0	8	370.5	44.5	852.38	11.7218627929688	32.2144660949707
253	14	2011-02-22	3	2	0	24.6666660308838	34.3333320617676	1	60	3	2	207	72	1	1	0	1	1	9	879.5047608	1090.12904	0.689521342	0	0.087382224	0	1	0	4.137128055	4.026808167	351.5420099	14.47994819	28.18765717	6.205692082	12.0804245	2.068564027	12.0804245	3.447606712	8.053616334	0	0	8	370.5	44.5	852.38	11.7218627929688	32.2144660949707
254	14	2011-02-22	4	2	0	33	26	1	60	3	2	207	72	1	1	0	1	1	9	879.5047608	1090.12904	0.689521342	0	0.087382224	0	1	0	4.137128055	4.026808167	351.5420099	14.47994819	28.18765717	6.205692082	12.0804245	2.068564027	12.0804245	3.447606712	8.053616334	0	0	8	370.5	44.5	852.38	11.7218627929688	32.2144660949707
255	14	2011-02-23	0	3	0	28	21	0.5	49.5	2	2	207	72	1	1	0	1	1	9	879.5047608	1090.12904	0.689521342	0	0.087382224	0	1	0	4.137128055	4.026808167	351.5420099	14.47994819	28.18765717	6.205692082	12.0804245	2.068564027	12.0804245	3.447606712	8.053616334	0	0	8	370.5	44.5	852.38	11.7218627929688	32.2144660949707
256	14	2011-02-23	1	3	0	27.25	28.5	4.25	60	3	2	207	72	1	1	0	1	1	9	879.5047608	1090.12904	0.689521342	0	0.087382224	0	1	0	4.137128055	4.026808167	351.5420099	14.47994819	28.18765717	6.205692082	12.0804245	2.068564027	12.0804245	3.447606712	8.053616334	0	0	8	370.5	44.5	852.38	11.7218627929688	32.2144660949707
257	14	2011-02-23	2	3	0	32	27.3999996185303	0.600000023841858	60	3	2	207	72	1	1	0	1	1	9	879.5047608	1090.12904	0.689521342	0	0.087382224	0	1	0	4.137128055	4.026808167	351.5420099	14.47994819	28.18765717	6.205692082	12.0804245	2.068564027	12.0804245	3.447606712	8.053616334	0	0	8	370.5	44.5	852.38	11.7218627929688	32.2144660949707
258	14	2011-02-23	3	3	0	15.3333330154419	37.3333320617676	7.33333349227905	60	3	2	207	72	1	1	0	1	1	9	879.5047608	1090.12904	0.689521342	0	0.087382224	0	1	0	4.137128055	4.026808167	351.5420099	14.47994819	28.18765717	6.205692082	12.0804245	2.068564027	12.0804245	3.447606712	8.053616334	0	0	8	370.5	44.5	852.38	11.7218627929688	32.2144660949707
259	14	2011-02-23	4	3	0	40.3333320617676	19.6666660308838	0	60	3	2	207	72	1	1	0	1	1	9	879.5047608	1090.12904	0.689521342	0	0.087382224	0	1	0	4.137128055	4.026808167	351.5420099	14.47994819	28.18765717	6.205692082	12.0804245	2.068564027	12.0804245	3.447606712	8.053616334	0	0	8	370.5	44.5	852.38	11.7218627929688	32.2144660949707
260	14	2011-02-24	2	4	0	18	42	0	60	1	2	207	72	1	1	0	1	1	9	879.5047608	1090.12904	0.689521342	0	0.087382224	0	1	0	4.137128055	4.026808167	351.5420099	14.47994819	28.18765717	6.205692082	12.0804245	2.068564027	12.0804245	3.447606712	8.053616334	0	0	8	370.5	44.5	852.38	11.7218627929688	32.2144660949707
261	14	2011-02-24	3	4	0	14.3333330154419	43	2.66666674613953	60	3	2	207	72	1	1	0	1	1	9	879.5047608	1090.12904	0.689521342	0	0.087382224	0	1	0	4.137128055	4.026808167	351.5420099	14.47994819	28.18765717	6.205692082	12.0804245	2.068564027	12.0804245	3.447606712	8.053616334	0	0	8	370.5	44.5	852.38	11.7218627929688	32.2144660949707
262	14	2011-02-24	4	4	0	1	16	1	18	1	2	207	72	1	1	0	1	1	9	879.5047608	1090.12904	0.689521342	0	0.087382224	0	1	0	4.137128055	4.026808167	351.5420099	14.47994819	28.18765717	6.205692082	12.0804245	2.068564027	12.0804245	3.447606712	8.053616334	0	0	8	370.5	44.5	852.38	11.7218627929688	32.2144660949707
263	16	2010-11-20	1	6	1	11	40.6666679382324	0.666666686534882	52.3333320617676	3	2	207	70	0	1	1	1	1	12	888.4749243	927.3234014	0.760073641	3.873942715	0.087382224	0.087382224	1	1	6.080589131	7.74788543	195.6414555	14.44139919	15.49577086	6.840662773	15.49577086	2.280220924	7.74788543	3.800368207	3.873942715	0.760073641	0	8	504.75	29.88	904.5	13.6813259124756	27.1175994873047
264	16	2010-11-20	2	6	1	24.3333339691162	31.8333339691162	3.83333325386047	60	3	2	207	70	0	1	1	1	1	12	888.4749243	927.3234014	0.760073641	3.873942715	0.087382224	0.087382224	1	1	6.080589131	7.74788543	195.6414555	14.44139919	15.49577086	6.840662773	15.49577086	2.280220924	7.74788543	3.800368207	3.873942715	0.760073641	0	8	504.75	29.88	904.5	13.6813259124756	27.1175994873047
265	16	2010-11-20	3	6	1	19.75	35.5	4.75	60	3	2	207	70	0	1	1	1	1	12	888.4749243	927.3234014	0.760073641	3.873942715	0.087382224	0.087382224	1	1	6.080589131	7.74788543	195.6414555	14.44139919	15.49577086	6.840662773	15.49577086	2.280220924	7.74788543	3.800368207	3.873942715	0.760073641	0	8	504.75	29.88	904.5	13.6813259124756	27.1175994873047
266	16	2010-11-20	4	6	1	41.3333320617676	18.3333339691162	0.333333343267441	60	3	2	207	70	0	1	1	1	1	12	888.4749243	927.3234014	0.760073641	3.873942715	0.087382224	0.087382224	1	1	6.080589131	7.74788543	195.6414555	14.44139919	15.49577086	6.840662773	15.49577086	2.280220924	7.74788543	3.800368207	3.873942715	0.760073641	0	8	504.75	29.88	904.5	13.6813259124756	27.1175994873047
267	16	2010-11-21	1	0	1	29.3333339691162	18.3333339691162	1	48.6666679382324	3	2	207	70	0	1	1	1	1	12	888.4749243	927.3234014	0.760073641	3.873942715	0.087382224	0.087382224	1	1	6.080589131	7.74788543	195.6414555	14.44139919	15.49577086	6.840662773	15.49577086	2.280220924	7.74788543	3.800368207	3.873942715	0.760073641	0	8	504.75	29.88	904.5	13.6813259124756	27.1175994873047
268	16	2010-11-21	2	0	1	34	26	0	60	3	2	207	70	0	1	1	1	1	12	888.4749243	927.3234014	0.760073641	3.873942715	0.087382224	0.087382224	1	1	6.080589131	7.74788543	195.6414555	14.44139919	15.49577086	6.840662773	15.49577086	2.280220924	7.74788543	3.800368207	3.873942715	0.760073641	0	8	504.75	29.88	904.5	13.6813259124756	27.1175994873047
269	16	2010-11-21	3	0	1	40.2000007629395	18.6000003814697	1.20000004768372	60	3	2	207	70	0	1	1	1	1	12	888.4749243	927.3234014	0.760073641	3.873942715	0.087382224	0.087382224	1	1	6.080589131	7.74788543	195.6414555	14.44139919	15.49577086	6.840662773	15.49577086	2.280220924	7.74788543	3.800368207	3.873942715	0.760073641	0	8	504.75	29.88	904.5	13.6813259124756	27.1175994873047
270	16	2010-11-21	4	0	1	35.7999992370605	24	0.200000002980232	60	3	2	207	70	0	1	1	1	1	12	888.4749243	927.3234014	0.760073641	3.873942715	0.087382224	0.087382224	1	1	6.080589131	7.74788543	195.6414555	14.44139919	15.49577086	6.840662773	15.49577086	2.280220924	7.74788543	3.800368207	3.873942715	0.760073641	0	8	504.75	29.88	904.5	13.6813259124756	27.1175994873047
271	16	2010-11-22	1	1	0	24.6666660308838	30	2	56.6666679382324	3	2	207	70	0	1	1	1	1	12	888.4749243	927.3234014	0.760073641	3.873942715	0.087382224	0.087382224	1	1	6.080589131	7.74788543	195.6414555	14.44139919	15.49577086	6.840662773	15.49577086	2.280220924	7.74788543	3.800368207	3.873942715	0.760073641	0	8	504.75	29.88	904.5	13.6813259124756	27.1175994873047
272	16	2010-11-22	2	1	0	46	14	0	60	3	2	207	70	0	1	1	1	1	12	888.4749243	927.3234014	0.760073641	3.873942715	0.087382224	0.087382224	1	1	6.080589131	7.74788543	195.6414555	14.44139919	15.49577086	6.840662773	15.49577086	2.280220924	7.74788543	3.800368207	3.873942715	0.760073641	0	8	504.75	29.88	904.5	13.6813259124756	27.1175994873047
273	16	2010-11-22	3	1	0	36	22.6666660308838	1.33333337306976	60	3	2	207	70	0	1	1	1	1	12	888.4749243	927.3234014	0.760073641	3.873942715	0.087382224	0.087382224	1	1	6.080589131	7.74788543	195.6414555	14.44139919	15.49577086	6.840662773	15.49577086	2.280220924	7.74788543	3.800368207	3.873942715	0.760073641	0	8	504.75	29.88	904.5	13.6813259124756	27.1175994873047
274	16	2010-11-22	4	1	0	41.5	18.25	0.25	60	3	2	207	70	0	1	1	1	1	12	888.4749243	927.3234014	0.760073641	3.873942715	0.087382224	0.087382224	1	1	6.080589131	7.74788543	195.6414555	14.44139919	15.49577086	6.840662773	15.49577086	2.280220924	7.74788543	3.800368207	3.873942715	0.760073641	0	8	504.75	29.88	904.5	13.6813259124756	27.1175994873047
275	16	2010-11-23	2	2	0	34.6666679382324	24.6666660308838	0.666666686534882	60	3	2	207	70	0	1	1	1	1	12	888.4749243	927.3234014	0.760073641	3.873942715	0.087382224	0.087382224	1	1	6.080589131	7.74788543	195.6414555	14.44139919	15.49577086	6.840662773	15.49577086	2.280220924	7.74788543	3.800368207	3.873942715	0.760073641	0	8	504.75	29.88	904.5	13.6813259124756	27.1175994873047
276	16	2010-11-23	3	2	0	47.6666679382324	12	0.333333343267441	60	3	2	207	70	0	1	1	1	1	12	888.4749243	927.3234014	0.760073641	3.873942715	0.087382224	0.087382224	1	1	6.080589131	7.74788543	195.6414555	14.44139919	15.49577086	6.840662773	15.49577086	2.280220924	7.74788543	3.800368207	3.873942715	0.760073641	0	8	504.75	29.88	904.5	13.6813259124756	27.1175994873047
277	16	2010-11-23	4	2	0	37.6666679382324	22.3333339691162	0	60	3	2	207	70	0	1	1	1	1	12	888.4749243	927.3234014	0.760073641	3.873942715	0.087382224	0.087382224	1	1	6.080589131	7.74788543	195.6414555	14.44139919	15.49577086	6.840662773	15.49577086	2.280220924	7.74788543	3.800368207	3.873942715	0.760073641	0	8	504.75	29.88	904.5	13.6813259124756	27.1175994873047
278	16	2010-12-09	1	4	0	32.3333320617676	17.6666660308838	1	51	3	2	207	70	0	1	1	1	1	12	888.4749243	927.3234014	0.760073641	3.873942715	0.087382224	0.087382224	1	1	6.080589131	7.74788543	195.6414555	14.44139919	15.49577086	6.840662773	15.49577086	2.280220924	7.74788543	3.800368207	3.873942715	0.760073641	0	8	504.75	29.88	904.5	13.6813259124756	27.1175994873047
279	16	2010-12-09	2	4	0	42	15.6666669845581	2.33333325386047	60	3	2	207	70	0	1	1	1	1	12	888.4749243	927.3234014	0.760073641	3.873942715	0.087382224	0.087382224	1	1	6.080589131	7.74788543	195.6414555	14.44139919	15.49577086	6.840662773	15.49577086	2.280220924	7.74788543	3.800368207	3.873942715	0.760073641	0	8	504.75	29.88	904.5	13.6813259124756	27.1175994873047
280	16	2010-12-09	3	4	0	50.3333320617676	9.33333301544189	0.333333343267441	60	3	2	207	70	0	1	1	1	1	12	888.4749243	927.3234014	0.760073641	3.873942715	0.087382224	0.087382224	1	1	6.080589131	7.74788543	195.6414555	14.44139919	15.49577086	6.840662773	15.49577086	2.280220924	7.74788543	3.800368207	3.873942715	0.760073641	0	8	504.75	29.88	904.5	13.6813259124756	27.1175994873047
281	16	2010-12-09	4	4	0	42.3333320617676	17.3333339691162	0.333333343267441	60	3	2	207	70	0	1	1	1	1	12	888.4749243	927.3234014	0.760073641	3.873942715	0.087382224	0.087382224	1	1	6.080589131	7.74788543	195.6414555	14.44139919	15.49577086	6.840662773	15.49577086	2.280220924	7.74788543	3.800368207	3.873942715	0.760073641	0	8	504.75	29.88	904.5	13.6813259124756	27.1175994873047
282	16	2011-02-24	1	4	0	4.66666650772095	29	14.6666669845581	48.3333320617676	3	2	207	70	0	1	1	1	1	12	888.4749243	927.3234014	0.760073641	3.873942715	0.087382224	0.087382224	1	1	6.080589131	7.74788543	195.6414555	14.44139919	15.49577086	6.840662773	15.49577086	2.280220924	7.74788543	3.800368207	3.873942715	0.760073641	0	8	504.75	29.88	904.5	13.6813259124756	27.1175994873047
283	16	2011-02-24	2	4	0	20.3333339691162	32.6666679382324	7	60	3	2	207	70	0	1	1	1	1	12	888.4749243	927.3234014	0.760073641	3.873942715	0.087382224	0.087382224	1	1	6.080589131	7.74788543	195.6414555	14.44139919	15.49577086	6.840662773	15.49577086	2.280220924	7.74788543	3.800368207	3.873942715	0.760073641	0	8	504.75	29.88	904.5	13.6813259124756	27.1175994873047
284	16	2011-02-24	3	4	0	39	16.6666660308838	4.33333349227905	60	3	2	207	70	0	1	1	1	1	12	888.4749243	927.3234014	0.760073641	3.873942715	0.087382224	0.087382224	1	1	6.080589131	7.74788543	195.6414555	14.44139919	15.49577086	6.840662773	15.49577086	2.280220924	7.74788543	3.800368207	3.873942715	0.760073641	0	8	504.75	29.88	904.5	13.6813259124756	27.1175994873047
285	16	2011-02-24	4	4	0	43.5	16.5	0	60	2	2	207	70	0	1	1	1	1	12	888.4749243	927.3234014	0.760073641	3.873942715	0.087382224	0.087382224	1	1	6.080589131	7.74788543	195.6414555	14.44139919	15.49577086	6.840662773	15.49577086	2.280220924	7.74788543	3.800368207	3.873942715	0.760073641	0	8	504.75	29.88	904.5	13.6813259124756	27.1175994873047
286	16	2011-02-25	0	5	0	8	23.5	2	33.5	2	2	207	70	0	1	1	1	1	12	888.4749243	927.3234014	0.760073641	3.873942715	0.087382224	0.087382224	1	1	6.080589131	7.74788543	195.6414555	14.44139919	15.49577086	6.840662773	15.49577086	2.280220924	7.74788543	3.800368207	3.873942715	0.760073641	0	8	504.75	29.88	904.5	13.6813259124756	27.1175994873047
287	16	2011-02-25	1	5	0	8.16666698455811	50.6666679382324	0.5	59.3333320617676	3	2	207	70	0	1	1	1	1	12	888.4749243	927.3234014	0.760073641	3.873942715	0.087382224	0.087382224	1	1	6.080589131	7.74788543	195.6414555	14.44139919	15.49577086	6.840662773	15.49577086	2.280220924	7.74788543	3.800368207	3.873942715	0.760073641	0	8	504.75	29.88	904.5	13.6813259124756	27.1175994873047
288	16	2011-02-25	2	5	0	17	28.3333339691162	14.6666669845581	60	3	2	207	70	0	1	1	1	1	12	888.4749243	927.3234014	0.760073641	3.873942715	0.087382224	0.087382224	1	1	6.080589131	7.74788543	195.6414555	14.44139919	15.49577086	6.840662773	15.49577086	2.280220924	7.74788543	3.800368207	3.873942715	0.760073641	0	8	504.75	29.88	904.5	13.6813259124756	27.1175994873047
289	16	2011-02-25	3	5	0	39.3333320617676	20	0.666666686534882	60	3	2	207	70	0	1	1	1	1	12	888.4749243	927.3234014	0.760073641	3.873942715	0.087382224	0.087382224	1	1	6.080589131	7.74788543	195.6414555	14.44139919	15.49577086	6.840662773	15.49577086	2.280220924	7.74788543	3.800368207	3.873942715	0.760073641	0	8	504.75	29.88	904.5	13.6813259124756	27.1175994873047
290	16	2011-02-25	4	5	0	36.75	21	2.25	60	3	2	207	70	0	1	1	1	1	12	888.4749243	927.3234014	0.760073641	3.873942715	0.087382224	0.087382224	1	1	6.080589131	7.74788543	195.6414555	14.44139919	15.49577086	6.840662773	15.49577086	2.280220924	7.74788543	3.800368207	3.873942715	0.760073641	0	8	504.75	29.88	904.5	13.6813259124756	27.1175994873047
291	17	2010-11-19	1	5	0	15.5	32.75	4.5	52.75	3	2	207	71	0	1	0	1	1	12	889.2661652	1098.183314	0.727891498	4.193449154	0.087382224	0.087382224	1	1	5.823131984	8.386898308	254.9606396	15.28572146	25.16069492	6.551023482	12.58034746	2.183674494	8.386898308	3.63945749	8.386898308	0	0	8	552.88	25.38	916	12.3741550445557	29.3541431427002
292	17	2010-11-19	2	5	0	27	25.3999996185303	7.59999990463257	60	3	2	207	71	0	1	0	1	1	12	889.2661652	1098.183314	0.727891498	4.193449154	0.087382224	0.087382224	1	1	5.823131984	8.386898308	254.9606396	15.28572146	25.16069492	6.551023482	12.58034746	2.183674494	8.386898308	3.63945749	8.386898308	0	0	8	552.88	25.38	916	12.3741550445557	29.3541431427002
293	17	2010-11-19	3	5	0	45.6666679382324	14.3333330154419	0	60	3	2	207	71	0	1	0	1	1	12	889.2661652	1098.183314	0.727891498	4.193449154	0.087382224	0.087382224	1	1	5.823131984	8.386898308	254.9606396	15.28572146	25.16069492	6.551023482	12.58034746	2.183674494	8.386898308	3.63945749	8.386898308	0	0	8	552.88	25.38	916	12.3741550445557	29.3541431427002
294	17	2010-11-19	4	5	0	34.3333320617676	25.3333339691162	0.333333343267441	60	3	2	207	71	0	1	0	1	1	12	889.2661652	1098.183314	0.727891498	4.193449154	0.087382224	0.087382224	1	1	5.823131984	8.386898308	254.9606396	15.28572146	25.16069492	6.551023482	12.58034746	2.183674494	8.386898308	3.63945749	8.386898308	0	0	8	552.88	25.38	916	12.3741550445557	29.3541431427002
295	17	2010-11-20	1	6	1	37.3333320617676	21.3333339691162	0.333333343267441	59	3	2	207	71	0	1	0	1	1	12	889.2661652	1098.183314	0.727891498	4.193449154	0.087382224	0.087382224	1	1	5.823131984	8.386898308	254.9606396	15.28572146	25.16069492	6.551023482	12.58034746	2.183674494	8.386898308	3.63945749	8.386898308	0	0	8	552.88	25.38	916	12.3741550445557	29.3541431427002
296	17	2010-11-20	2	6	1	33.5	21.5	5	60	3	2	207	71	0	1	0	1	1	12	889.2661652	1098.183314	0.727891498	4.193449154	0.087382224	0.087382224	1	1	5.823131984	8.386898308	254.9606396	15.28572146	25.16069492	6.551023482	12.58034746	2.183674494	8.386898308	3.63945749	8.386898308	0	0	8	552.88	25.38	916	12.3741550445557	29.3541431427002
297	17	2010-11-20	3	6	1	36	23.3333339691162	0.666666686534882	60	3	2	207	71	0	1	0	1	1	12	889.2661652	1098.183314	0.727891498	4.193449154	0.087382224	0.087382224	1	1	5.823131984	8.386898308	254.9606396	15.28572146	25.16069492	6.551023482	12.58034746	2.183674494	8.386898308	3.63945749	8.386898308	0	0	8	552.88	25.38	916	12.3741550445557	29.3541431427002
298	17	2010-11-20	4	6	1	25.3333339691162	32.6666679382324	2	60	3	2	207	71	0	1	0	1	1	12	889.2661652	1098.183314	0.727891498	4.193449154	0.087382224	0.087382224	1	1	5.823131984	8.386898308	254.9606396	15.28572146	25.16069492	6.551023482	12.58034746	2.183674494	8.386898308	3.63945749	8.386898308	0	0	8	552.88	25.38	916	12.3741550445557	29.3541431427002
299	17	2010-11-21	0	0	1	30.5	23	1	54.5	2	2	207	71	0	1	0	1	1	12	889.2661652	1098.183314	0.727891498	4.193449154	0.087382224	0.087382224	1	1	5.823131984	8.386898308	254.9606396	15.28572146	25.16069492	6.551023482	12.58034746	2.183674494	8.386898308	3.63945749	8.386898308	0	0	8	552.88	25.38	916	12.3741550445557	29.3541431427002
300	17	2010-11-21	1	0	1	37.3333320617676	20	2.66666674613953	60	3	2	207	71	0	1	0	1	1	12	889.2661652	1098.183314	0.727891498	4.193449154	0.087382224	0.087382224	1	1	5.823131984	8.386898308	254.9606396	15.28572146	25.16069492	6.551023482	12.58034746	2.183674494	8.386898308	3.63945749	8.386898308	0	0	8	552.88	25.38	916	12.3741550445557	29.3541431427002
301	17	2010-11-21	2	0	1	31.3333339691162	28	0.666666686534882	60	3	2	207	71	0	1	0	1	1	12	889.2661652	1098.183314	0.727891498	4.193449154	0.087382224	0.087382224	1	1	5.823131984	8.386898308	254.9606396	15.28572146	25.16069492	6.551023482	12.58034746	2.183674494	8.386898308	3.63945749	8.386898308	0	0	8	552.88	25.38	916	12.3741550445557	29.3541431427002
302	17	2010-11-21	3	0	1	37.3333320617676	21.3333339691162	1.33333337306976	60	3	2	207	71	0	1	0	1	1	12	889.2661652	1098.183314	0.727891498	4.193449154	0.087382224	0.087382224	1	1	5.823131984	8.386898308	254.9606396	15.28572146	25.16069492	6.551023482	12.58034746	2.183674494	8.386898308	3.63945749	8.386898308	0	0	8	552.88	25.38	916	12.3741550445557	29.3541431427002
303	17	2010-11-21	4	0	1	38.3333320617676	21.1666660308838	0.5	60	3	2	207	71	0	1	0	1	1	12	889.2661652	1098.183314	0.727891498	4.193449154	0.087382224	0.087382224	1	1	5.823131984	8.386898308	254.9606396	15.28572146	25.16069492	6.551023482	12.58034746	2.183674494	8.386898308	3.63945749	8.386898308	0	0	8	552.88	25.38	916	12.3741550445557	29.3541431427002
304	17	2010-11-23	0	2	0	59	0	1	60	1	2	207	71	0	1	0	1	1	12	889.2661652	1098.183314	0.727891498	4.193449154	0.087382224	0.087382224	1	1	5.823131984	8.386898308	254.9606396	15.28572146	25.16069492	6.551023482	12.58034746	2.183674494	8.386898308	3.63945749	8.386898308	0	0	8	552.88	25.38	916	12.3741550445557	29.3541431427002
305	17	2010-11-23	1	2	0	38.6666679382324	21.3333339691162	0	60	3	2	207	71	0	1	0	1	1	12	889.2661652	1098.183314	0.727891498	4.193449154	0.087382224	0.087382224	1	1	5.823131984	8.386898308	254.9606396	15.28572146	25.16069492	6.551023482	12.58034746	2.183674494	8.386898308	3.63945749	8.386898308	0	0	8	552.88	25.38	916	12.3741550445557	29.3541431427002
306	17	2010-11-23	2	2	0	28.6666660308838	25.3333339691162	6	60	3	2	207	71	0	1	0	1	1	12	889.2661652	1098.183314	0.727891498	4.193449154	0.087382224	0.087382224	1	1	5.823131984	8.386898308	254.9606396	15.28572146	25.16069492	6.551023482	12.58034746	2.183674494	8.386898308	3.63945749	8.386898308	0	0	8	552.88	25.38	916	12.3741550445557	29.3541431427002
307	17	2010-11-24	0	3	0	0	11	1	12	1	2	207	71	0	1	0	1	1	12	889.2661652	1098.183314	0.727891498	4.193449154	0.087382224	0.087382224	1	1	5.823131984	8.386898308	254.9606396	15.28572146	25.16069492	6.551023482	12.58034746	2.183674494	8.386898308	3.63945749	8.386898308	0	0	8	552.88	25.38	916	12.3741550445557	29.3541431427002
308	17	2010-11-24	1	3	0	19.3333339691162	39.3333320617676	1.33333337306976	60	3	2	207	71	0	1	0	1	1	12	889.2661652	1098.183314	0.727891498	4.193449154	0.087382224	0.087382224	1	1	5.823131984	8.386898308	254.9606396	15.28572146	25.16069492	6.551023482	12.58034746	2.183674494	8.386898308	3.63945749	8.386898308	0	0	8	552.88	25.38	916	12.3741550445557	29.3541431427002
309	17	2010-11-24	2	3	0	47.3333320617676	12.3333330154419	0.333333343267441	60	3	2	207	71	0	1	0	1	1	12	889.2661652	1098.183314	0.727891498	4.193449154	0.087382224	0.087382224	1	1	5.823131984	8.386898308	254.9606396	15.28572146	25.16069492	6.551023482	12.58034746	2.183674494	8.386898308	3.63945749	8.386898308	0	0	8	552.88	25.38	916	12.3741550445557	29.3541431427002
310	17	2010-11-24	3	3	0	35.1666679382324	17	7.83333349227905	60	3	2	207	71	0	1	0	1	1	12	889.2661652	1098.183314	0.727891498	4.193449154	0.087382224	0.087382224	1	1	5.823131984	8.386898308	254.9606396	15.28572146	25.16069492	6.551023482	12.58034746	2.183674494	8.386898308	3.63945749	8.386898308	0	0	8	552.88	25.38	916	12.3741550445557	29.3541431427002
311	17	2010-11-24	4	3	0	34	24	2	60	3	2	207	71	0	1	0	1	1	12	889.2661652	1098.183314	0.727891498	4.193449154	0.087382224	0.087382224	1	1	5.823131984	8.386898308	254.9606396	15.28572146	25.16069492	6.551023482	12.58034746	2.183674494	8.386898308	3.63945749	8.386898308	0	0	8	552.88	25.38	916	12.3741550445557	29.3541431427002
312	17	2010-11-25	0	4	0	2	9.5	0	11.5	2	2	207	71	0	1	0	1	1	12	889.2661652	1098.183314	0.727891498	4.193449154	0.087382224	0.087382224	1	1	5.823131984	8.386898308	254.9606396	15.28572146	25.16069492	6.551023482	12.58034746	2.183674494	8.386898308	3.63945749	8.386898308	0	0	8	552.88	25.38	916	12.3741550445557	29.3541431427002
313	17	2010-11-25	1	4	0	41.6666679382324	18	0.333333343267441	60	3	2	207	71	0	1	0	1	1	12	889.2661652	1098.183314	0.727891498	4.193449154	0.087382224	0.087382224	1	1	5.823131984	8.386898308	254.9606396	15.28572146	25.16069492	6.551023482	12.58034746	2.183674494	8.386898308	3.63945749	8.386898308	0	0	8	552.88	25.38	916	12.3741550445557	29.3541431427002
314	17	2010-11-25	2	4	0	30	29.6666660308838	0.333333343267441	60	3	2	207	71	0	1	0	1	1	12	889.2661652	1098.183314	0.727891498	4.193449154	0.087382224	0.087382224	1	1	5.823131984	8.386898308	254.9606396	15.28572146	25.16069492	6.551023482	12.58034746	2.183674494	8.386898308	3.63945749	8.386898308	0	0	8	552.88	25.38	916	12.3741550445557	29.3541431427002
315	17	2010-11-25	3	4	0	40.3333320617676	18.6666660308838	1	60	3	2	207	71	0	1	0	1	1	12	889.2661652	1098.183314	0.727891498	4.193449154	0.087382224	0.087382224	1	1	5.823131984	8.386898308	254.9606396	15.28572146	25.16069492	6.551023482	12.58034746	2.183674494	8.386898308	3.63945749	8.386898308	0	0	8	552.88	25.38	916	12.3741550445557	29.3541431427002
316	17	2010-11-25	4	4	0	42.3333320617676	17.6666660308838	0	60	3	2	207	71	0	1	0	1	1	12	889.2661652	1098.183314	0.727891498	4.193449154	0.087382224	0.087382224	1	1	5.823131984	8.386898308	254.9606396	15.28572146	25.16069492	6.551023482	12.58034746	2.183674494	8.386898308	3.63945749	8.386898308	0	0	8	552.88	25.38	916	12.3741550445557	29.3541431427002
317	17	2010-11-26	1	5	0	23.5	25.5	1.25	50.25	3	2	207	71	0	1	0	1	1	12	889.2661652	1098.183314	0.727891498	4.193449154	0.087382224	0.087382224	1	1	5.823131984	8.386898308	254.9606396	15.28572146	25.16069492	6.551023482	12.58034746	2.183674494	8.386898308	3.63945749	8.386898308	0	0	8	552.88	25.38	916	12.3741550445557	29.3541431427002
318	17	2010-11-26	2	5	0	33	27	0	60	3	2	207	71	0	1	0	1	1	12	889.2661652	1098.183314	0.727891498	4.193449154	0.087382224	0.087382224	1	1	5.823131984	8.386898308	254.9606396	15.28572146	25.16069492	6.551023482	12.58034746	2.183674494	8.386898308	3.63945749	8.386898308	0	0	8	552.88	25.38	916	12.3741550445557	29.3541431427002
319	17	2010-11-26	3	5	0	23	36.6666679382324	0.333333343267441	60	3	2	207	71	0	1	0	1	1	12	889.2661652	1098.183314	0.727891498	4.193449154	0.087382224	0.087382224	1	1	5.823131984	8.386898308	254.9606396	15.28572146	25.16069492	6.551023482	12.58034746	2.183674494	8.386898308	3.63945749	8.386898308	0	0	8	552.88	25.38	916	12.3741550445557	29.3541431427002
320	17	2010-11-26	4	5	0	41	18.3333339691162	0.666666686534882	60	3	2	207	71	0	1	0	1	1	12	889.2661652	1098.183314	0.727891498	4.193449154	0.087382224	0.087382224	1	1	5.823131984	8.386898308	254.9606396	15.28572146	25.16069492	6.551023482	12.58034746	2.183674494	8.386898308	3.63945749	8.386898308	0	0	8	552.88	25.38	916	12.3741550445557	29.3541431427002
321	20	2010-11-21	0	0	1	60	0	0	60	1	2	207	70	1	1	0	1	1	11	889.2661652	1098.183314	0.727891498	4.193449154	0.087382224	0.087382224	1	1	5.823131984	8.386898308	254.9606396	15.28572146	25.16069492	6.551023482	12.58034746	2.183674494	8.386898308	3.63945749	8.386898308	0	0	8	423.38	34.25	818.25	12.3741550445557	29.3541431427002
322	20	2010-11-22	0	1	0	4	8	0	12	1	2	207	70	1	1	0	1	1	11	889.2661652	1098.183314	0.727891498	4.193449154	0.087382224	0.087382224	1	1	5.823131984	8.386898308	254.9606396	15.28572146	25.16069492	6.551023482	12.58034746	2.183674494	8.386898308	3.63945749	8.386898308	0	0	8	423.38	34.25	818.25	12.3741550445557	29.3541431427002
323	20	2010-11-22	1	1	0	11	38.8333320617676	10.1666669845581	60	3	2	207	70	1	1	0	1	1	11	889.2661652	1098.183314	0.727891498	4.193449154	0.087382224	0.087382224	1	1	5.823131984	8.386898308	254.9606396	15.28572146	25.16069492	6.551023482	12.58034746	2.183674494	8.386898308	3.63945749	8.386898308	0	0	8	423.38	34.25	818.25	12.3741550445557	29.3541431427002
324	20	2010-11-22	2	1	0	12.3333330154419	47.3333320617676	0.333333343267441	60	3	2	207	70	1	1	0	1	1	11	889.2661652	1098.183314	0.727891498	4.193449154	0.087382224	0.087382224	1	1	5.823131984	8.386898308	254.9606396	15.28572146	25.16069492	6.551023482	12.58034746	2.183674494	8.386898308	3.63945749	8.386898308	0	0	8	423.38	34.25	818.25	12.3741550445557	29.3541431427002
325	20	2010-11-22	3	1	0	33.6666679382324	25	1.33333337306976	60	3	2	207	70	1	1	0	1	1	11	889.2661652	1098.183314	0.727891498	4.193449154	0.087382224	0.087382224	1	1	5.823131984	8.386898308	254.9606396	15.28572146	25.16069492	6.551023482	12.58034746	2.183674494	8.386898308	3.63945749	8.386898308	0	0	8	423.38	34.25	818.25	12.3741550445557	29.3541431427002
326	20	2010-11-22	4	1	0	36	20.6666660308838	3.33333325386047	60	3	2	207	70	1	1	0	1	1	11	889.2661652	1098.183314	0.727891498	4.193449154	0.087382224	0.087382224	1	1	5.823131984	8.386898308	254.9606396	15.28572146	25.16069492	6.551023482	12.58034746	2.183674494	8.386898308	3.63945749	8.386898308	0	0	8	423.38	34.25	818.25	12.3741550445557	29.3541431427002
327	20	2010-11-23	1	2	0	27.3333339691162	22.3333339691162	0.333333343267441	50	3	2	207	70	1	1	0	1	1	11	889.2661652	1098.183314	0.727891498	4.193449154	0.087382224	0.087382224	1	1	5.823131984	8.386898308	254.9606396	15.28572146	25.16069492	6.551023482	12.58034746	2.183674494	8.386898308	3.63945749	8.386898308	0	0	8	423.38	34.25	818.25	12.3741550445557	29.3541431427002
328	20	2010-11-23	2	2	0	21.3333339691162	33.1666679382324	5.5	60	3	2	207	70	1	1	0	1	1	11	889.2661652	1098.183314	0.727891498	4.193449154	0.087382224	0.087382224	1	1	5.823131984	8.386898308	254.9606396	15.28572146	25.16069492	6.551023482	12.58034746	2.183674494	8.386898308	3.63945749	8.386898308	0	0	8	423.38	34.25	818.25	12.3741550445557	29.3541431427002
329	20	2010-11-23	3	2	0	26.3333339691162	32.6666679382324	1	60	3	2	207	70	1	1	0	1	1	11	889.2661652	1098.183314	0.727891498	4.193449154	0.087382224	0.087382224	1	1	5.823131984	8.386898308	254.9606396	15.28572146	25.16069492	6.551023482	12.58034746	2.183674494	8.386898308	3.63945749	8.386898308	0	0	8	423.38	34.25	818.25	12.3741550445557	29.3541431427002
330	20	2010-11-23	4	2	0	35.6666679382324	21	3.33333325386047	60	3	2	207	70	1	1	0	1	1	11	889.2661652	1098.183314	0.727891498	4.193449154	0.087382224	0.087382224	1	1	5.823131984	8.386898308	254.9606396	15.28572146	25.16069492	6.551023482	12.58034746	2.183674494	8.386898308	3.63945749	8.386898308	0	0	8	423.38	34.25	818.25	12.3741550445557	29.3541431427002
331	20	2010-11-24	1	3	0	19	25	0.333333343267441	44.3333320617676	3	2	207	70	1	1	0	1	1	11	889.2661652	1098.183314	0.727891498	4.193449154	0.087382224	0.087382224	1	1	5.823131984	8.386898308	254.9606396	15.28572146	25.16069492	6.551023482	12.58034746	2.183674494	8.386898308	3.63945749	8.386898308	0	0	8	423.38	34.25	818.25	12.3741550445557	29.3541431427002
332	20	2010-11-24	2	3	0	50.6666679382324	9.33333301544189	0	60	3	2	207	70	1	1	0	1	1	11	889.2661652	1098.183314	0.727891498	4.193449154	0.087382224	0.087382224	1	1	5.823131984	8.386898308	254.9606396	15.28572146	25.16069492	6.551023482	12.58034746	2.183674494	8.386898308	3.63945749	8.386898308	0	0	8	423.38	34.25	818.25	12.3741550445557	29.3541431427002
333	20	2010-11-24	3	3	0	33	25	2	60	3	2	207	70	1	1	0	1	1	11	889.2661652	1098.183314	0.727891498	4.193449154	0.087382224	0.087382224	1	1	5.823131984	8.386898308	254.9606396	15.28572146	25.16069492	6.551023482	12.58034746	2.183674494	8.386898308	3.63945749	8.386898308	0	0	8	423.38	34.25	818.25	12.3741550445557	29.3541431427002
334	20	2010-11-24	4	3	0	32.5	25.5	2	60	3	2	207	70	1	1	0	1	1	11	889.2661652	1098.183314	0.727891498	4.193449154	0.087382224	0.087382224	1	1	5.823131984	8.386898308	254.9606396	15.28572146	25.16069492	6.551023482	12.58034746	2.183674494	8.386898308	3.63945749	8.386898308	0	0	8	423.38	34.25	818.25	12.3741550445557	29.3541431427002
335	20	2010-11-25	1	4	0	12.3999996185303	20.7999992370605	4.80000019073486	38	3	2	207	70	1	1	0	1	1	11	889.2661652	1098.183314	0.727891498	4.193449154	0.087382224	0.087382224	1	1	5.823131984	8.386898308	254.9606396	15.28572146	25.16069492	6.551023482	12.58034746	2.183674494	8.386898308	3.63945749	8.386898308	0	0	8	423.38	34.25	818.25	12.3741550445557	29.3541431427002
336	20	2010-11-25	2	4	0	29	27.3333339691162	3.66666674613953	60	3	2	207	70	1	1	0	1	1	11	889.2661652	1098.183314	0.727891498	4.193449154	0.087382224	0.087382224	1	1	5.823131984	8.386898308	254.9606396	15.28572146	25.16069492	6.551023482	12.58034746	2.183674494	8.386898308	3.63945749	8.386898308	0	0	8	423.38	34.25	818.25	12.3741550445557	29.3541431427002
337	20	2010-11-25	3	4	0	32.6666679382324	25.3333339691162	2	60	3	2	207	70	1	1	0	1	1	11	889.2661652	1098.183314	0.727891498	4.193449154	0.087382224	0.087382224	1	1	5.823131984	8.386898308	254.9606396	15.28572146	25.16069492	6.551023482	12.58034746	2.183674494	8.386898308	3.63945749	8.386898308	0	0	8	423.38	34.25	818.25	12.3741550445557	29.3541431427002
338	20	2010-11-25	4	4	0	40.4000015258789	18.2000007629395	1.20000004768372	59.7999992370605	3	2	207	70	1	1	0	1	1	11	889.2661652	1098.183314	0.727891498	4.193449154	0.087382224	0.087382224	1	1	5.823131984	8.386898308	254.9606396	15.28572146	25.16069492	6.551023482	12.58034746	2.183674494	8.386898308	3.63945749	8.386898308	0	0	8	423.38	34.25	818.25	12.3741550445557	29.3541431427002
339	20	2010-11-26	1	5	0	20.6666660308838	38.6666679382324	0	59.3333320617676	3	2	207	70	1	1	0	1	1	11	889.2661652	1098.183314	0.727891498	4.193449154	0.087382224	0.087382224	1	1	5.823131984	8.386898308	254.9606396	15.28572146	25.16069492	6.551023482	12.58034746	2.183674494	8.386898308	3.63945749	8.386898308	0	0	8	423.38	34.25	818.25	12.3741550445557	29.3541431427002
340	20	2010-11-26	2	5	0	17.8333339691162	37.5	4.66666650772095	60	3	2	207	70	1	1	0	1	1	11	889.2661652	1098.183314	0.727891498	4.193449154	0.087382224	0.087382224	1	1	5.823131984	8.386898308	254.9606396	15.28572146	25.16069492	6.551023482	12.58034746	2.183674494	8.386898308	3.63945749	8.386898308	0	0	8	423.38	34.25	818.25	12.3741550445557	29.3541431427002
341	20	2010-11-26	3	5	0	25.5	33.25	1.25	60	3	2	207	70	1	1	0	1	1	11	889.2661652	1098.183314	0.727891498	4.193449154	0.087382224	0.087382224	1	1	5.823131984	8.386898308	254.9606396	15.28572146	25.16069492	6.551023482	12.58034746	2.183674494	8.386898308	3.63945749	8.386898308	0	0	8	423.38	34.25	818.25	12.3741550445557	29.3541431427002
342	20	2010-11-26	4	5	0	31.3333339691162	27.6666660308838	1	60	3	2	207	70	1	1	0	1	1	11	889.2661652	1098.183314	0.727891498	4.193449154	0.087382224	0.087382224	1	1	5.823131984	8.386898308	254.9606396	15.28572146	25.16069492	6.551023482	12.58034746	2.183674494	8.386898308	3.63945749	8.386898308	0	0	8	423.38	34.25	818.25	12.3741550445557	29.3541431427002
343	20	2010-12-01	0	3	0	15	24.5	1.5	41	2	2	207	70	1	1	0	1	1	11	889.2661652	1098.183314	0.727891498	4.193449154	0.087382224	0.087382224	1	1	5.823131984	8.386898308	254.9606396	15.28572146	25.16069492	6.551023482	12.58034746	2.183674494	8.386898308	3.63945749	8.386898308	0	0	8	423.38	34.25	818.25	12.3741550445557	29.3541431427002
344	20	2010-12-01	1	3	0	17.3333339691162	38.3333320617676	4.33333349227905	60	3	2	207	70	1	1	0	1	1	11	889.2661652	1098.183314	0.727891498	4.193449154	0.087382224	0.087382224	1	1	5.823131984	8.386898308	254.9606396	15.28572146	25.16069492	6.551023482	12.58034746	2.183674494	8.386898308	3.63945749	8.386898308	0	0	8	423.38	34.25	818.25	12.3741550445557	29.3541431427002
345	20	2010-12-01	2	3	0	39.6666679382324	19.6666660308838	0.666666686534882	60	3	2	207	70	1	1	0	1	1	11	889.2661652	1098.183314	0.727891498	4.193449154	0.087382224	0.087382224	1	1	5.823131984	8.386898308	254.9606396	15.28572146	25.16069492	6.551023482	12.58034746	2.183674494	8.386898308	3.63945749	8.386898308	0	0	8	423.38	34.25	818.25	12.3741550445557	29.3541431427002
346	20	2010-12-01	3	3	0	39.2000007629395	20.6000003814697	0.200000002980232	60	3	2	207	70	1	1	0	1	1	11	889.2661652	1098.183314	0.727891498	4.193449154	0.087382224	0.087382224	1	1	5.823131984	8.386898308	254.9606396	15.28572146	25.16069492	6.551023482	12.58034746	2.183674494	8.386898308	3.63945749	8.386898308	0	0	8	423.38	34.25	818.25	12.3741550445557	29.3541431427002
347	20	2010-12-01	4	3	0	39.3333320617676	20.6666660308838	0	60	3	2	207	70	1	1	0	1	1	11	889.2661652	1098.183314	0.727891498	4.193449154	0.087382224	0.087382224	1	1	5.823131984	8.386898308	254.9606396	15.28572146	25.16069492	6.551023482	12.58034746	2.183674494	8.386898308	3.63945749	8.386898308	0	0	8	423.38	34.25	818.25	12.3741550445557	29.3541431427002
348	20	2010-12-02	1	4	0	36.3333320617676	3	1.33333337306976	40.6666679382324	3	2	207	70	1	1	0	1	1	11	889.2661652	1098.183314	0.727891498	4.193449154	0.087382224	0.087382224	1	1	5.823131984	8.386898308	254.9606396	15.28572146	25.16069492	6.551023482	12.58034746	2.183674494	8.386898308	3.63945749	8.386898308	0	0	8	423.38	34.25	818.25	12.3741550445557	29.3541431427002
349	20	2010-12-02	2	4	0	45.3333320617676	8.66666698455811	6	60	3	2	207	70	1	1	0	1	1	11	889.2661652	1098.183314	0.727891498	4.193449154	0.087382224	0.087382224	1	1	5.823131984	8.386898308	254.9606396	15.28572146	25.16069492	6.551023482	12.58034746	2.183674494	8.386898308	3.63945749	8.386898308	0	0	8	423.38	34.25	818.25	12.3741550445557	29.3541431427002
350	20	2010-12-02	3	4	0	31	22.3333339691162	6.66666650772095	60	3	2	207	70	1	1	0	1	1	11	889.2661652	1098.183314	0.727891498	4.193449154	0.087382224	0.087382224	1	1	5.823131984	8.386898308	254.9606396	15.28572146	25.16069492	6.551023482	12.58034746	2.183674494	8.386898308	3.63945749	8.386898308	0	0	8	423.38	34.25	818.25	12.3741550445557	29.3541431427002
351	20	2010-12-02	4	4	0	42.5999984741211	15.8000001907349	1.39999997615814	59.7999992370605	3	2	207	70	1	1	0	1	1	11	889.2661652	1098.183314	0.727891498	4.193449154	0.087382224	0.087382224	1	1	5.823131984	8.386898308	254.9606396	15.28572146	25.16069492	6.551023482	12.58034746	2.183674494	8.386898308	3.63945749	8.386898308	0	0	8	423.38	34.25	818.25	12.3741550445557	29.3541431427002
352	21	2010-12-02	0	4	0	59	0	1	60	1	2	207	67	0	1	0	1	1	12	896.823243	929.6955618	0.770390858	3.854085911	0.087382224	0.087382224	1	1	6.163126868	7.708171823	175.1336159	14.63742631	15.41634365	6.933517726	15.41634365	2.311172575	7.708171823	3.851954292	3.854085911	0.770390858	0	10	581.1	25	917.7	13.8670358657837	26.9786014556885
353	21	2010-12-02	1	4	0	37	23	0	60	1	2	207	67	0	1	0	1	1	12	896.823243	929.6955618	0.770390858	3.854085911	0.087382224	0.087382224	1	1	6.163126868	7.708171823	175.1336159	14.63742631	15.41634365	6.933517726	15.41634365	2.311172575	7.708171823	3.851954292	3.854085911	0.770390858	0	10	581.1	25	917.7	13.8670358657837	26.9786014556885
354	21	2010-12-03	0	5	0	0	11	1	12	1	2	207	67	0	1	0	1	1	12	896.823243	929.6955618	0.770390858	3.854085911	0.087382224	0.087382224	1	1	6.163126868	7.708171823	175.1336159	14.63742631	15.41634365	6.933517726	15.41634365	2.311172575	7.708171823	3.851954292	3.854085911	0.770390858	0	10	581.1	25	917.7	13.8670358657837	26.9786014556885
355	21	2010-12-03	1	5	0	27.3999996185303	31.7999992370605	0.800000011920929	60	3	2	207	67	0	1	0	1	1	12	896.823243	929.6955618	0.770390858	3.854085911	0.087382224	0.087382224	1	1	6.163126868	7.708171823	175.1336159	14.63742631	15.41634365	6.933517726	15.41634365	2.311172575	7.708171823	3.851954292	3.854085911	0.770390858	0	10	581.1	25	917.7	13.8670358657837	26.9786014556885
356	21	2010-12-03	2	5	0	29.75	25.5	4.75	60	3	2	207	67	0	1	0	1	1	12	896.823243	929.6955618	0.770390858	3.854085911	0.087382224	0.087382224	1	1	6.163126868	7.708171823	175.1336159	14.63742631	15.41634365	6.933517726	15.41634365	2.311172575	7.708171823	3.851954292	3.854085911	0.770390858	0	10	581.1	25	917.7	13.8670358657837	26.9786014556885
357	21	2010-12-03	3	5	0	24.3333339691162	20	15.6666669845581	60	3	2	207	67	0	1	0	1	1	12	896.823243	929.6955618	0.770390858	3.854085911	0.087382224	0.087382224	1	1	6.163126868	7.708171823	175.1336159	14.63742631	15.41634365	6.933517726	15.41634365	2.311172575	7.708171823	3.851954292	3.854085911	0.770390858	0	10	581.1	25	917.7	13.8670358657837	26.9786014556885
358	21	2010-12-03	4	5	0	34	24	2	60	3	2	207	67	0	1	0	1	1	12	896.823243	929.6955618	0.770390858	3.854085911	0.087382224	0.087382224	1	1	6.163126868	7.708171823	175.1336159	14.63742631	15.41634365	6.933517726	15.41634365	2.311172575	7.708171823	3.851954292	3.854085911	0.770390858	0	10	581.1	25	917.7	13.8670358657837	26.9786014556885
359	21	2010-12-04	0	6	1	4	10	0	14	1	2	207	67	0	1	0	1	1	12	896.823243	929.6955618	0.770390858	3.854085911	0.087382224	0.087382224	1	1	6.163126868	7.708171823	175.1336159	14.63742631	15.41634365	6.933517726	15.41634365	2.311172575	7.708171823	3.851954292	3.854085911	0.770390858	0	10	581.1	25	917.7	13.8670358657837	26.9786014556885
360	21	2010-12-04	1	6	1	41.6666679382324	18	0.333333343267441	60	3	2	207	67	0	1	0	1	1	12	896.823243	929.6955618	0.770390858	3.854085911	0.087382224	0.087382224	1	1	6.163126868	7.708171823	175.1336159	14.63742631	15.41634365	6.933517726	15.41634365	2.311172575	7.708171823	3.851954292	3.854085911	0.770390858	0	10	581.1	25	917.7	13.8670358657837	26.9786014556885
361	21	2010-12-04	2	6	1	39.7999992370605	20	0.200000002980232	60	3	2	207	67	0	1	0	1	1	12	896.823243	929.6955618	0.770390858	3.854085911	0.087382224	0.087382224	1	1	6.163126868	7.708171823	175.1336159	14.63742631	15.41634365	6.933517726	15.41634365	2.311172575	7.708171823	3.851954292	3.854085911	0.770390858	0	10	581.1	25	917.7	13.8670358657837	26.9786014556885
362	21	2010-12-04	3	6	1	41.5999984741211	17.7999992370605	0.600000023841858	60	3	2	207	67	0	1	0	1	1	12	896.823243	929.6955618	0.770390858	3.854085911	0.087382224	0.087382224	1	1	6.163126868	7.708171823	175.1336159	14.63742631	15.41634365	6.933517726	15.41634365	2.311172575	7.708171823	3.851954292	3.854085911	0.770390858	0	10	581.1	25	917.7	13.8670358657837	26.9786014556885
363	21	2010-12-04	4	6	1	45	15	0	60	3	2	207	67	0	1	0	1	1	12	896.823243	929.6955618	0.770390858	3.854085911	0.087382224	0.087382224	1	1	6.163126868	7.708171823	175.1336159	14.63742631	15.41634365	6.933517726	15.41634365	2.311172575	7.708171823	3.851954292	3.854085911	0.770390858	0	10	581.1	25	917.7	13.8670358657837	26.9786014556885
364	21	2010-12-05	0	0	1	0	9	0	9	1	2	207	67	0	1	0	1	1	12	896.823243	929.6955618	0.770390858	3.854085911	0.087382224	0.087382224	1	1	6.163126868	7.708171823	175.1336159	14.63742631	15.41634365	6.933517726	15.41634365	2.311172575	7.708171823	3.851954292	3.854085911	0.770390858	0	10	581.1	25	917.7	13.8670358657837	26.9786014556885
365	21	2010-12-05	1	0	1	30.3333339691162	29.3333339691162	0.333333343267441	60	3	2	207	67	0	1	0	1	1	12	896.823243	929.6955618	0.770390858	3.854085911	0.087382224	0.087382224	1	1	6.163126868	7.708171823	175.1336159	14.63742631	15.41634365	6.933517726	15.41634365	2.311172575	7.708171823	3.851954292	3.854085911	0.770390858	0	10	581.1	25	917.7	13.8670358657837	26.9786014556885
366	21	2010-12-05	2	0	1	33	27	0	60	3	2	207	67	0	1	0	1	1	12	896.823243	929.6955618	0.770390858	3.854085911	0.087382224	0.087382224	1	1	6.163126868	7.708171823	175.1336159	14.63742631	15.41634365	6.933517726	15.41634365	2.311172575	7.708171823	3.851954292	3.854085911	0.770390858	0	10	581.1	25	917.7	13.8670358657837	26.9786014556885
367	21	2010-12-05	3	0	1	30	29.75	0.25	60	3	2	207	67	0	1	0	1	1	12	896.823243	929.6955618	0.770390858	3.854085911	0.087382224	0.087382224	1	1	6.163126868	7.708171823	175.1336159	14.63742631	15.41634365	6.933517726	15.41634365	2.311172575	7.708171823	3.851954292	3.854085911	0.770390858	0	10	581.1	25	917.7	13.8670358657837	26.9786014556885
368	21	2010-12-05	4	0	1	38.7999992370605	20.7999992370605	0.400000005960464	60	3	2	207	67	0	1	0	1	1	12	896.823243	929.6955618	0.770390858	3.854085911	0.087382224	0.087382224	1	1	6.163126868	7.708171823	175.1336159	14.63742631	15.41634365	6.933517726	15.41634365	2.311172575	7.708171823	3.851954292	3.854085911	0.770390858	0	10	581.1	25	917.7	13.8670358657837	26.9786014556885
369	21	2010-12-06	1	1	0	13	29	4.40000009536743	46.4000015258789	3	2	207	67	0	1	0	1	1	12	896.823243	929.6955618	0.770390858	3.854085911	0.087382224	0.087382224	1	1	6.163126868	7.708171823	175.1336159	14.63742631	15.41634365	6.933517726	15.41634365	2.311172575	7.708171823	3.851954292	3.854085911	0.770390858	0	10	581.1	25	917.7	13.8670358657837	26.9786014556885
370	21	2010-12-06	2	1	0	44.6666679382324	15	0.333333343267441	60	3	2	207	67	0	1	0	1	1	12	896.823243	929.6955618	0.770390858	3.854085911	0.087382224	0.087382224	1	1	6.163126868	7.708171823	175.1336159	14.63742631	15.41634365	6.933517726	15.41634365	2.311172575	7.708171823	3.851954292	3.854085911	0.770390858	0	10	581.1	25	917.7	13.8670358657837	26.9786014556885
371	21	2010-12-06	3	1	0	45.6666679382324	14.3333330154419	0	60	3	2	207	67	0	1	0	1	1	12	896.823243	929.6955618	0.770390858	3.854085911	0.087382224	0.087382224	1	1	6.163126868	7.708171823	175.1336159	14.63742631	15.41634365	6.933517726	15.41634365	2.311172575	7.708171823	3.851954292	3.854085911	0.770390858	0	10	581.1	25	917.7	13.8670358657837	26.9786014556885
372	21	2010-12-06	4	1	0	37.75	22	0.25	60	3	2	207	67	0	1	0	1	1	12	896.823243	929.6955618	0.770390858	3.854085911	0.087382224	0.087382224	1	1	6.163126868	7.708171823	175.1336159	14.63742631	15.41634365	6.933517726	15.41634365	2.311172575	7.708171823	3.851954292	3.854085911	0.770390858	0	10	581.1	25	917.7	13.8670358657837	26.9786014556885
373	21	2010-12-07	1	2	0	37.3333320617676	21.3333339691162	0.333333343267441	59	3	2	207	67	0	1	0	1	1	12	896.823243	929.6955618	0.770390858	3.854085911	0.087382224	0.087382224	1	1	6.163126868	7.708171823	175.1336159	14.63742631	15.41634365	6.933517726	15.41634365	2.311172575	7.708171823	3.851954292	3.854085911	0.770390858	0	10	581.1	25	917.7	13.8670358657837	26.9786014556885
374	21	2010-12-07	2	2	0	22.5	28	9.5	60	3	2	207	67	0	1	0	1	1	12	896.823243	929.6955618	0.770390858	3.854085911	0.087382224	0.087382224	1	1	6.163126868	7.708171823	175.1336159	14.63742631	15.41634365	6.933517726	15.41634365	2.311172575	7.708171823	3.851954292	3.854085911	0.770390858	0	10	581.1	25	917.7	13.8670358657837	26.9786014556885
375	21	2010-12-07	3	2	0	31.5	27.75	0.75	60	3	2	207	67	0	1	0	1	1	12	896.823243	929.6955618	0.770390858	3.854085911	0.087382224	0.087382224	1	1	6.163126868	7.708171823	175.1336159	14.63742631	15.41634365	6.933517726	15.41634365	2.311172575	7.708171823	3.851954292	3.854085911	0.770390858	0	10	581.1	25	917.7	13.8670358657837	26.9786014556885
376	21	2010-12-07	4	2	0	25.3333339691162	32.6666679382324	2	60	3	2	207	67	0	1	0	1	1	12	896.823243	929.6955618	0.770390858	3.854085911	0.087382224	0.087382224	1	1	6.163126868	7.708171823	175.1336159	14.63742631	15.41634365	6.933517726	15.41634365	2.311172575	7.708171823	3.851954292	3.854085911	0.770390858	0	10	581.1	25	917.7	13.8670358657837	26.9786014556885
377	21	2010-12-08	0	3	0	30.5	23	1	54.5	2	2	207	67	0	1	0	1	1	12	896.823243	929.6955618	0.770390858	3.854085911	0.087382224	0.087382224	1	1	6.163126868	7.708171823	175.1336159	14.63742631	15.41634365	6.933517726	15.41634365	2.311172575	7.708171823	3.851954292	3.854085911	0.770390858	0	10	581.1	25	917.7	13.8670358657837	26.9786014556885
378	21	2010-12-08	1	3	0	37.3333320617676	20	2.66666674613953	60	3	2	207	67	0	1	0	1	1	12	896.823243	929.6955618	0.770390858	3.854085911	0.087382224	0.087382224	1	1	6.163126868	7.708171823	175.1336159	14.63742631	15.41634365	6.933517726	15.41634365	2.311172575	7.708171823	3.851954292	3.854085911	0.770390858	0	10	581.1	25	917.7	13.8670358657837	26.9786014556885
379	21	2010-12-08	2	3	0	31.3333339691162	28	0.666666686534882	60	3	2	207	67	0	1	0	1	1	12	896.823243	929.6955618	0.770390858	3.854085911	0.087382224	0.087382224	1	1	6.163126868	7.708171823	175.1336159	14.63742631	15.41634365	6.933517726	15.41634365	2.311172575	7.708171823	3.851954292	3.854085911	0.770390858	0	10	581.1	25	917.7	13.8670358657837	26.9786014556885
380	21	2010-12-08	3	3	0	40.4000015258789	18.6000003814697	1	60	3	2	207	67	0	1	0	1	1	12	896.823243	929.6955618	0.770390858	3.854085911	0.087382224	0.087382224	1	1	6.163126868	7.708171823	175.1336159	14.63742631	15.41634365	6.933517726	15.41634365	2.311172575	7.708171823	3.851954292	3.854085911	0.770390858	0	10	581.1	25	917.7	13.8670358657837	26.9786014556885
381	21	2010-12-08	4	3	0	38.3333320617676	21.1666660308838	0.5	60	3	2	207	67	0	1	0	1	1	12	896.823243	929.6955618	0.770390858	3.854085911	0.087382224	0.087382224	1	1	6.163126868	7.708171823	175.1336159	14.63742631	15.41634365	6.933517726	15.41634365	2.311172575	7.708171823	3.851954292	3.854085911	0.770390858	0	10	581.1	25	917.7	13.8670358657837	26.9786014556885
382	22	2010-12-01	0	3	0	29.5	5.5	1	36	2	2	207	69	0	1	0	1	1	12	888.2367729	1073.063478	0.719105418	4.163684608	0.087382224	0.087382224	1	1	5.752843348	8.327369216	277.5642176	15.10121379	29.14579225	6.471948766	12.49105382	2.157316255	12.49105382	3.595527092	8.327369216	0	0	6	295	64	689.67	12.2247924804688	33.3094787597656
383	22	2010-12-01	1	3	0	32.5999984741211	27.3999996185303	0	60	3	2	207	69	0	1	0	1	1	12	888.2367729	1073.063478	0.719105418	4.163684608	0.087382224	0.087382224	1	1	5.752843348	8.327369216	277.5642176	15.10121379	29.14579225	6.471948766	12.49105382	2.157316255	12.49105382	3.595527092	8.327369216	0	0	6	295	64	689.67	12.2247924804688	33.3094787597656
384	22	2010-12-01	2	3	0	28.6666660308838	25.3333339691162	6	60	3	2	207	69	0	1	0	1	1	12	888.2367729	1073.063478	0.719105418	4.163684608	0.087382224	0.087382224	1	1	5.752843348	8.327369216	277.5642176	15.10121379	29.14579225	6.471948766	12.49105382	2.157316255	12.49105382	3.595527092	8.327369216	0	0	6	295	64	689.67	12.2247924804688	33.3094787597656
385	22	2010-12-01	3	3	0	24.3333339691162	20	15.6666669845581	60	3	2	207	69	0	1	0	1	1	12	888.2367729	1073.063478	0.719105418	4.163684608	0.087382224	0.087382224	1	1	5.752843348	8.327369216	277.5642176	15.10121379	29.14579225	6.471948766	12.49105382	2.157316255	12.49105382	3.595527092	8.327369216	0	0	6	295	64	689.67	12.2247924804688	33.3094787597656
386	22	2010-12-01	4	3	0	34	24	2	60	3	2	207	69	0	1	0	1	1	12	888.2367729	1073.063478	0.719105418	4.163684608	0.087382224	0.087382224	1	1	5.752843348	8.327369216	277.5642176	15.10121379	29.14579225	6.471948766	12.49105382	2.157316255	12.49105382	3.595527092	8.327369216	0	0	6	295	64	689.67	12.2247924804688	33.3094787597656
387	22	2010-12-02	0	4	0	4	10	0	14	1	2	207	69	0	1	0	1	1	12	888.2367729	1073.063478	0.719105418	4.163684608	0.087382224	0.087382224	1	1	5.752843348	8.327369216	277.5642176	15.10121379	29.14579225	6.471948766	12.49105382	2.157316255	12.49105382	3.595527092	8.327369216	0	0	6	295	64	689.67	12.2247924804688	33.3094787597656
388	22	2010-12-02	1	4	0	34	24.75	1.25	60	3	2	207	69	0	1	0	1	1	12	888.2367729	1073.063478	0.719105418	4.163684608	0.087382224	0.087382224	1	1	5.752843348	8.327369216	277.5642176	15.10121379	29.14579225	6.471948766	12.49105382	2.157316255	12.49105382	3.595527092	8.327369216	0	0	6	295	64	689.67	12.2247924804688	33.3094787597656
389	22	2010-12-02	2	4	0	41	18.6000003814697	0.400000005960464	60	3	2	207	69	0	1	0	1	1	12	888.2367729	1073.063478	0.719105418	4.163684608	0.087382224	0.087382224	1	1	5.752843348	8.327369216	277.5642176	15.10121379	29.14579225	6.471948766	12.49105382	2.157316255	12.49105382	3.595527092	8.327369216	0	0	6	295	64	689.67	12.2247924804688	33.3094787597656
390	22	2010-12-02	3	4	0	46	14	0	60	3	2	207	69	0	1	0	1	1	12	888.2367729	1073.063478	0.719105418	4.163684608	0.087382224	0.087382224	1	1	5.752843348	8.327369216	277.5642176	15.10121379	29.14579225	6.471948766	12.49105382	2.157316255	12.49105382	3.595527092	8.327369216	0	0	6	295	64	689.67	12.2247924804688	33.3094787597656
391	22	2010-12-02	4	4	0	45	15	0	60	3	2	207	69	0	1	0	1	1	12	888.2367729	1073.063478	0.719105418	4.163684608	0.087382224	0.087382224	1	1	5.752843348	8.327369216	277.5642176	15.10121379	29.14579225	6.471948766	12.49105382	2.157316255	12.49105382	3.595527092	8.327369216	0	0	6	295	64	689.67	12.2247924804688	33.3094787597656
392	22	2010-12-03	0	5	0	0	9	0	9	1	2	207	69	0	1	0	1	1	12	888.2367729	1073.063478	0.719105418	4.163684608	0.087382224	0.087382224	1	1	5.752843348	8.327369216	277.5642176	15.10121379	29.14579225	6.471948766	12.49105382	2.157316255	12.49105382	3.595527092	8.327369216	0	0	6	295	64	689.67	12.2247924804688	33.3094787597656
393	22	2010-12-03	1	5	0	30.3333339691162	29.3333339691162	0.333333343267441	60	3	2	207	69	0	1	0	1	1	12	888.2367729	1073.063478	0.719105418	4.163684608	0.087382224	0.087382224	1	1	5.752843348	8.327369216	277.5642176	15.10121379	29.14579225	6.471948766	12.49105382	2.157316255	12.49105382	3.595527092	8.327369216	0	0	6	295	64	689.67	12.2247924804688	33.3094787597656
394	22	2010-12-03	2	5	0	31.5	28.5	0	60	3	2	207	69	0	1	0	1	1	12	888.2367729	1073.063478	0.719105418	4.163684608	0.087382224	0.087382224	1	1	5.752843348	8.327369216	277.5642176	15.10121379	29.14579225	6.471948766	12.49105382	2.157316255	12.49105382	3.595527092	8.327369216	0	0	6	295	64	689.67	12.2247924804688	33.3094787597656
395	22	2010-12-03	3	5	0	35.5	23.75	0.75	60	3	2	207	69	0	1	0	1	1	12	888.2367729	1073.063478	0.719105418	4.163684608	0.087382224	0.087382224	1	1	5.752843348	8.327369216	277.5642176	15.10121379	29.14579225	6.471948766	12.49105382	2.157316255	12.49105382	3.595527092	8.327369216	0	0	6	295	64	689.67	12.2247924804688	33.3094787597656
396	22	2010-12-03	4	5	0	39.6666679382324	20.3333339691162	0	60	3	2	207	69	0	1	0	1	1	12	888.2367729	1073.063478	0.719105418	4.163684608	0.087382224	0.087382224	1	1	5.752843348	8.327369216	277.5642176	15.10121379	29.14579225	6.471948766	12.49105382	2.157316255	12.49105382	3.595527092	8.327369216	0	0	6	295	64	689.67	12.2247924804688	33.3094787597656
397	22	2010-12-04	1	6	1	17.6666660308838	27.3333339691162	2	47	3	2	207	69	0	1	0	1	1	12	888.2367729	1073.063478	0.719105418	4.163684608	0.087382224	0.087382224	1	1	5.752843348	8.327369216	277.5642176	15.10121379	29.14579225	6.471948766	12.49105382	2.157316255	12.49105382	3.595527092	8.327369216	0	0	6	295	64	689.67	12.2247924804688	33.3094787597656
398	22	2010-12-04	2	6	1	44.6666679382324	15	0.333333343267441	60	3	2	207	69	0	1	0	1	1	12	888.2367729	1073.063478	0.719105418	4.163684608	0.087382224	0.087382224	1	1	5.752843348	8.327369216	277.5642176	15.10121379	29.14579225	6.471948766	12.49105382	2.157316255	12.49105382	3.595527092	8.327369216	0	0	6	295	64	689.67	12.2247924804688	33.3094787597656
399	22	2010-12-04	3	6	1	31.6666660308838	28	0.333333343267441	60	3	2	207	69	0	1	0	1	1	12	888.2367729	1073.063478	0.719105418	4.163684608	0.087382224	0.087382224	1	1	5.752843348	8.327369216	277.5642176	15.10121379	29.14579225	6.471948766	12.49105382	2.157316255	12.49105382	3.595527092	8.327369216	0	0	6	295	64	689.67	12.2247924804688	33.3094787597656
400	22	2010-12-04	4	6	1	41	18.3333339691162	0.666666686534882	60	3	2	207	69	0	1	0	1	1	12	888.2367729	1073.063478	0.719105418	4.163684608	0.087382224	0.087382224	1	1	5.752843348	8.327369216	277.5642176	15.10121379	29.14579225	6.471948766	12.49105382	2.157316255	12.49105382	3.595527092	8.327369216	0	0	6	295	64	689.67	12.2247924804688	33.3094787597656
401	22	2010-12-05	1	0	1	6	31.5	8	45.5	2	2	207	69	0	1	0	1	1	12	888.2367729	1073.063478	0.719105418	4.163684608	0.087382224	0.087382224	1	1	5.752843348	8.327369216	277.5642176	15.10121379	29.14579225	6.471948766	12.49105382	2.157316255	12.49105382	3.595527092	8.327369216	0	0	6	295	64	689.67	12.2247924804688	33.3094787597656
402	22	2010-12-05	2	0	1	4.66666650772095	37.6666679382324	17.6666660308838	60	3	2	207	69	0	1	0	1	1	12	888.2367729	1073.063478	0.719105418	4.163684608	0.087382224	0.087382224	1	1	5.752843348	8.327369216	277.5642176	15.10121379	29.14579225	6.471948766	12.49105382	2.157316255	12.49105382	3.595527092	8.327369216	0	0	6	295	64	689.67	12.2247924804688	33.3094787597656
403	22	2010-12-05	3	0	1	37.75	21.5	0.75	60	3	2	207	69	0	1	0	1	1	12	888.2367729	1073.063478	0.719105418	4.163684608	0.087382224	0.087382224	1	1	5.752843348	8.327369216	277.5642176	15.10121379	29.14579225	6.471948766	12.49105382	2.157316255	12.49105382	3.595527092	8.327369216	0	0	6	295	64	689.67	12.2247924804688	33.3094787597656
404	22	2010-12-05	4	0	1	34.3333320617676	25.3333339691162	0.333333343267441	60	3	2	207	69	0	1	0	1	1	12	888.2367729	1073.063478	0.719105418	4.163684608	0.087382224	0.087382224	1	1	5.752843348	8.327369216	277.5642176	15.10121379	29.14579225	6.471948766	12.49105382	2.157316255	12.49105382	3.595527092	8.327369216	0	0	6	295	64	689.67	12.2247924804688	33.3094787597656
405	22	2010-12-06	1	1	0	37.3333320617676	21.3333339691162	0.333333343267441	59	3	2	207	69	0	1	0	1	1	12	888.2367729	1073.063478	0.719105418	4.163684608	0.087382224	0.087382224	1	1	5.752843348	8.327369216	277.5642176	15.10121379	29.14579225	6.471948766	12.49105382	2.157316255	12.49105382	3.595527092	8.327369216	0	0	6	295	64	689.67	12.2247924804688	33.3094787597656
406	22	2010-12-06	2	1	0	40.3333320617676	18.3333339691162	1.33333337306976	60	3	2	207	69	0	1	0	1	1	12	888.2367729	1073.063478	0.719105418	4.163684608	0.087382224	0.087382224	1	1	5.752843348	8.327369216	277.5642176	15.10121379	29.14579225	6.471948766	12.49105382	2.157316255	12.49105382	3.595527092	8.327369216	0	0	6	295	64	689.67	12.2247924804688	33.3094787597656
407	22	2010-12-06	3	1	0	38.75	21	0.25	60	3	2	207	69	0	1	0	1	1	12	888.2367729	1073.063478	0.719105418	4.163684608	0.087382224	0.087382224	1	1	5.752843348	8.327369216	277.5642176	15.10121379	29.14579225	6.471948766	12.49105382	2.157316255	12.49105382	3.595527092	8.327369216	0	0	6	295	64	689.67	12.2247924804688	33.3094787597656
408	22	2010-12-06	4	1	0	33.2000007629395	25.3999996185303	1.39999997615814	60	3	2	207	69	0	1	0	1	1	12	888.2367729	1073.063478	0.719105418	4.163684608	0.087382224	0.087382224	1	1	5.752843348	8.327369216	277.5642176	15.10121379	29.14579225	6.471948766	12.49105382	2.157316255	12.49105382	3.595527092	8.327369216	0	0	6	295	64	689.67	12.2247924804688	33.3094787597656
409	22	2010-12-07	0	2	0	30.5	23	1	54.5	2	2	207	69	0	1	0	1	1	12	888.2367729	1073.063478	0.719105418	4.163684608	0.087382224	0.087382224	1	1	5.752843348	8.327369216	277.5642176	15.10121379	29.14579225	6.471948766	12.49105382	2.157316255	12.49105382	3.595527092	8.327369216	0	0	6	295	64	689.67	12.2247924804688	33.3094787597656
410	22	2010-12-07	1	2	0	37.3333320617676	20	2.66666674613953	60	3	2	207	69	0	1	0	1	1	12	888.2367729	1073.063478	0.719105418	4.163684608	0.087382224	0.087382224	1	1	5.752843348	8.327369216	277.5642176	15.10121379	29.14579225	6.471948766	12.49105382	2.157316255	12.49105382	3.595527092	8.327369216	0	0	6	295	64	689.67	12.2247924804688	33.3094787597656
411	22	2010-12-07	2	2	0	31.3333339691162	28	0.666666686534882	60	3	2	207	69	0	1	0	1	1	12	888.2367729	1073.063478	0.719105418	4.163684608	0.087382224	0.087382224	1	1	5.752843348	8.327369216	277.5642176	15.10121379	29.14579225	6.471948766	12.49105382	2.157316255	12.49105382	3.595527092	8.327369216	0	0	6	295	64	689.67	12.2247924804688	33.3094787597656
412	22	2010-12-07	3	2	0	37.3333320617676	21.3333339691162	1.33333337306976	60	3	2	207	69	0	1	0	1	1	12	888.2367729	1073.063478	0.719105418	4.163684608	0.087382224	0.087382224	1	1	5.752843348	8.327369216	277.5642176	15.10121379	29.14579225	6.471948766	12.49105382	2.157316255	12.49105382	3.595527092	8.327369216	0	0	6	295	64	689.67	12.2247924804688	33.3094787597656
413	22	2010-12-07	4	2	0	35	24.5	0.5	60	3	2	207	69	0	1	0	1	1	12	888.2367729	1073.063478	0.719105418	4.163684608	0.087382224	0.087382224	1	1	5.752843348	8.327369216	277.5642176	15.10121379	29.14579225	6.471948766	12.49105382	2.157316255	12.49105382	3.595527092	8.327369216	0	0	6	295	64	689.67	12.2247924804688	33.3094787597656
414	23	2010-12-01	0	3	0	0	9	0	9	1	2	207	76	0	1	0	1	1	9	879.5047608	1090.12904	0.689521342	0	0.087382224	0	1	0	4.137128055	4.026808167	351.5420099	14.47994819	28.18765717	6.205692082	12.0804245	2.068564027	12.0804245	3.447606712	8.053616334	0	0	8	574.13	148.75	894.25	11.7218627929688	32.2144660949707
415	23	2010-12-01	1	3	0	35	24.6000003814697	0.400000005960464	60	3	2	207	76	0	1	0	1	1	9	879.5047608	1090.12904	0.689521342	0	0.087382224	0	1	0	4.137128055	4.026808167	351.5420099	14.47994819	28.18765717	6.205692082	12.0804245	2.068564027	12.0804245	3.447606712	8.053616334	0	0	8	574.13	148.75	894.25	11.7218627929688	32.2144660949707
416	23	2010-12-01	2	3	0	30.5	29.25	0.25	60	3	2	207	76	0	1	0	1	1	9	879.5047608	1090.12904	0.689521342	0	0.087382224	0	1	0	4.137128055	4.026808167	351.5420099	14.47994819	28.18765717	6.205692082	12.0804245	2.068564027	12.0804245	3.447606712	8.053616334	0	0	8	574.13	148.75	894.25	11.7218627929688	32.2144660949707
417	23	2010-12-01	3	3	0	40.3333320617676	18.6666660308838	1	60	3	2	207	76	0	1	0	1	1	9	879.5047608	1090.12904	0.689521342	0	0.087382224	0	1	0	4.137128055	4.026808167	351.5420099	14.47994819	28.18765717	6.205692082	12.0804245	2.068564027	12.0804245	3.447606712	8.053616334	0	0	8	574.13	148.75	894.25	11.7218627929688	32.2144660949707
418	23	2010-12-01	4	3	0	39.6666679382324	20.3333339691162	0	60	3	2	207	76	0	1	0	1	1	9	879.5047608	1090.12904	0.689521342	0	0.087382224	0	1	0	4.137128055	4.026808167	351.5420099	14.47994819	28.18765717	6.205692082	12.0804245	2.068564027	12.0804245	3.447606712	8.053616334	0	0	8	574.13	148.75	894.25	11.7218627929688	32.2144660949707
419	23	2010-12-02	1	4	0	17.6666660308838	27.3333339691162	2	47	3	2	207	76	0	1	0	1	1	9	879.5047608	1090.12904	0.689521342	0	0.087382224	0	1	0	4.137128055	4.026808167	351.5420099	14.47994819	28.18765717	6.205692082	12.0804245	2.068564027	12.0804245	3.447606712	8.053616334	0	0	8	574.13	148.75	894.25	11.7218627929688	32.2144660949707
420	23	2010-12-02	2	4	0	40.2000007629395	19.6000003814697	0.200000002980232	60	3	2	207	76	0	1	0	1	1	9	879.5047608	1090.12904	0.689521342	0	0.087382224	0	1	0	4.137128055	4.026808167	351.5420099	14.47994819	28.18765717	6.205692082	12.0804245	2.068564027	12.0804245	3.447606712	8.053616334	0	0	8	574.13	148.75	894.25	11.7218627929688	32.2144660949707
421	23	2010-12-02	3	4	0	30.6000003814697	29.2000007629395	0.200000002980232	60	3	2	207	76	0	1	0	1	1	9	879.5047608	1090.12904	0.689521342	0	0.087382224	0	1	0	4.137128055	4.026808167	351.5420099	14.47994819	28.18765717	6.205692082	12.0804245	2.068564027	12.0804245	3.447606712	8.053616334	0	0	8	574.13	148.75	894.25	11.7218627929688	32.2144660949707
422	23	2010-12-02	4	4	0	41	18.3333339691162	0.666666686534882	60	3	2	207	76	0	1	0	1	1	9	879.5047608	1090.12904	0.689521342	0	0.087382224	0	1	0	4.137128055	4.026808167	351.5420099	14.47994819	28.18765717	6.205692082	12.0804245	2.068564027	12.0804245	3.447606712	8.053616334	0	0	8	574.13	148.75	894.25	11.7218627929688	32.2144660949707
423	23	2010-12-03	1	5	0	17.3333339691162	26.3333339691162	5.66666650772095	49.3333320617676	3	2	207	76	0	1	0	1	1	9	879.5047608	1090.12904	0.689521342	0	0.087382224	0	1	0	4.137128055	4.026808167	351.5420099	14.47994819	28.18765717	6.205692082	12.0804245	2.068564027	12.0804245	3.447606712	8.053616334	0	0	8	574.13	148.75	894.25	11.7218627929688	32.2144660949707
424	23	2010-12-03	2	5	0	4.66666650772095	37.6666679382324	17.6666660308838	60	3	2	207	76	0	1	0	1	1	9	879.5047608	1090.12904	0.689521342	0	0.087382224	0	1	0	4.137128055	4.026808167	351.5420099	14.47994819	28.18765717	6.205692082	12.0804245	2.068564027	12.0804245	3.447606712	8.053616334	0	0	8	574.13	148.75	894.25	11.7218627929688	32.2144660949707
425	23	2010-12-03	3	5	0	35.75	23.5	0.75	60	3	2	207	76	0	1	0	1	1	9	879.5047608	1090.12904	0.689521342	0	0.087382224	0	1	0	4.137128055	4.026808167	351.5420099	14.47994819	28.18765717	6.205692082	12.0804245	2.068564027	12.0804245	3.447606712	8.053616334	0	0	8	574.13	148.75	894.25	11.7218627929688	32.2144660949707
426	23	2010-12-03	4	5	0	29.8333339691162	29	1.16666662693024	60	3	2	207	76	0	1	0	1	1	9	879.5047608	1090.12904	0.689521342	0	0.087382224	0	1	0	4.137128055	4.026808167	351.5420099	14.47994819	28.18765717	6.205692082	12.0804245	2.068564027	12.0804245	3.447606712	8.053616334	0	0	8	574.13	148.75	894.25	11.7218627929688	32.2144660949707
427	23	2010-12-04	0	6	1	30.5	23	1	54.5	2	2	207	76	0	1	0	1	1	9	879.5047608	1090.12904	0.689521342	0	0.087382224	0	1	0	4.137128055	4.026808167	351.5420099	14.47994819	28.18765717	6.205692082	12.0804245	2.068564027	12.0804245	3.447606712	8.053616334	0	0	8	574.13	148.75	894.25	11.7218627929688	32.2144660949707
428	23	2010-12-04	1	6	1	36.7999992370605	21.6000003814697	1.60000002384186	60	3	2	207	76	0	1	0	1	1	9	879.5047608	1090.12904	0.689521342	0	0.087382224	0	1	0	4.137128055	4.026808167	351.5420099	14.47994819	28.18765717	6.205692082	12.0804245	2.068564027	12.0804245	3.447606712	8.053616334	0	0	8	574.13	148.75	894.25	11.7218627929688	32.2144660949707
429	23	2010-12-04	2	6	1	36.5	22.25	1.25	60	3	2	207	76	0	1	0	1	1	9	879.5047608	1090.12904	0.689521342	0	0.087382224	0	1	0	4.137128055	4.026808167	351.5420099	14.47994819	28.18765717	6.205692082	12.0804245	2.068564027	12.0804245	3.447606712	8.053616334	0	0	8	574.13	148.75	894.25	11.7218627929688	32.2144660949707
430	23	2010-12-04	3	6	1	42	17.6666660308838	0.333333343267441	60	3	2	207	76	0	1	0	1	1	9	879.5047608	1090.12904	0.689521342	0	0.087382224	0	1	0	4.137128055	4.026808167	351.5420099	14.47994819	28.18765717	6.205692082	12.0804245	2.068564027	12.0804245	3.447606712	8.053616334	0	0	8	574.13	148.75	894.25	11.7218627929688	32.2144660949707
431	23	2010-12-04	4	6	1	43.6666679382324	16	0.333333343267441	60	3	2	207	76	0	1	0	1	1	9	879.5047608	1090.12904	0.689521342	0	0.087382224	0	1	0	4.137128055	4.026808167	351.5420099	14.47994819	28.18765717	6.205692082	12.0804245	2.068564027	12.0804245	3.447606712	8.053616334	0	0	8	574.13	148.75	894.25	11.7218627929688	32.2144660949707
432	23	2010-12-05	2	0	1	34.5	25	0.5	60	2	2	207	76	0	1	0	1	1	9	879.5047608	1090.12904	0.689521342	0	0.087382224	0	1	0	4.137128055	4.026808167	351.5420099	14.47994819	28.18765717	6.205692082	12.0804245	2.068564027	12.0804245	3.447606712	8.053616334	0	0	8	574.13	148.75	894.25	11.7218627929688	32.2144660949707
433	23	2010-12-05	3	0	1	37.3333320617676	21.3333339691162	1.33333337306976	60	3	2	207	76	0	1	0	1	1	9	879.5047608	1090.12904	0.689521342	0	0.087382224	0	1	0	4.137128055	4.026808167	351.5420099	14.47994819	28.18765717	6.205692082	12.0804245	2.068564027	12.0804245	3.447606712	8.053616334	0	0	8	574.13	148.75	894.25	11.7218627929688	32.2144660949707
434	23	2010-12-05	4	0	1	33	26.3333339691162	0.666666686534882	60	3	2	207	76	0	1	0	1	1	9	879.5047608	1090.12904	0.689521342	0	0.087382224	0	1	0	4.137128055	4.026808167	351.5420099	14.47994819	28.18765717	6.205692082	12.0804245	2.068564027	12.0804245	3.447606712	8.053616334	0	0	8	574.13	148.75	894.25	11.7218627929688	32.2144660949707
435	23	2010-12-07	0	2	0	59	0	1	60	1	2	207	76	0	1	0	1	1	9	879.5047608	1090.12904	0.689521342	0	0.087382224	0	1	0	4.137128055	4.026808167	351.5420099	14.47994819	28.18765717	6.205692082	12.0804245	2.068564027	12.0804245	3.447606712	8.053616334	0	0	8	574.13	148.75	894.25	11.7218627929688	32.2144660949707
436	23	2010-12-08	0	3	0	0	11	1	12	1	2	207	76	0	1	0	1	1	9	879.5047608	1090.12904	0.689521342	0	0.087382224	0	1	0	4.137128055	4.026808167	351.5420099	14.47994819	28.18765717	6.205692082	12.0804245	2.068564027	12.0804245	3.447606712	8.053616334	0	0	8	574.13	148.75	894.25	11.7218627929688	32.2144660949707
437	23	2010-12-08	1	3	0	32.5999984741211	27.3999996185303	0	60	3	2	207	76	0	1	0	1	1	9	879.5047608	1090.12904	0.689521342	0	0.087382224	0	1	0	4.137128055	4.026808167	351.5420099	14.47994819	28.18765717	6.205692082	12.0804245	2.068564027	12.0804245	3.447606712	8.053616334	0	0	8	574.13	148.75	894.25	11.7218627929688	32.2144660949707
438	23	2010-12-08	2	3	0	28.6666660308838	25.3333339691162	6	60	3	2	207	76	0	1	0	1	1	9	879.5047608	1090.12904	0.689521342	0	0.087382224	0	1	0	4.137128055	4.026808167	351.5420099	14.47994819	28.18765717	6.205692082	12.0804245	2.068564027	12.0804245	3.447606712	8.053616334	0	0	8	574.13	148.75	894.25	11.7218627929688	32.2144660949707
439	23	2010-12-08	3	3	0	24.3333339691162	20	15.6666669845581	60	3	2	207	76	0	1	0	1	1	9	879.5047608	1090.12904	0.689521342	0	0.087382224	0	1	0	4.137128055	4.026808167	351.5420099	14.47994819	28.18765717	6.205692082	12.0804245	2.068564027	12.0804245	3.447606712	8.053616334	0	0	8	574.13	148.75	894.25	11.7218627929688	32.2144660949707
440	23	2010-12-08	4	3	0	34	24	2	60	3	2	207	76	0	1	0	1	1	9	879.5047608	1090.12904	0.689521342	0	0.087382224	0	1	0	4.137128055	4.026808167	351.5420099	14.47994819	28.18765717	6.205692082	12.0804245	2.068564027	12.0804245	3.447606712	8.053616334	0	0	8	574.13	148.75	894.25	11.7218627929688	32.2144660949707
441	23	2010-12-09	0	4	0	4	10	0	14	1	2	207	76	0	1	0	1	1	9	879.5047608	1090.12904	0.689521342	0	0.087382224	0	1	0	4.137128055	4.026808167	351.5420099	14.47994819	28.18765717	6.205692082	12.0804245	2.068564027	12.0804245	3.447606712	8.053616334	0	0	8	574.13	148.75	894.25	11.7218627929688	32.2144660949707
442	23	2010-12-09	1	4	0	26	32	2	60	2	2	207	76	0	1	0	1	1	9	879.5047608	1090.12904	0.689521342	0	0.087382224	0	1	0	4.137128055	4.026808167	351.5420099	14.47994819	28.18765717	6.205692082	12.0804245	2.068564027	12.0804245	3.447606712	8.053616334	0	0	8	574.13	148.75	894.25	11.7218627929688	32.2144660949707
443	23	2010-12-09	2	4	0	47.3333320617676	12.3333330154419	0.333333343267441	60	3	2	207	76	0	1	0	1	1	9	879.5047608	1090.12904	0.689521342	0	0.087382224	0	1	0	4.137128055	4.026808167	351.5420099	14.47994819	28.18765717	6.205692082	12.0804245	2.068564027	12.0804245	3.447606712	8.053616334	0	0	8	574.13	148.75	894.25	11.7218627929688	32.2144660949707
444	23	2010-12-09	3	4	0	46	14	0	60	3	2	207	76	0	1	0	1	1	9	879.5047608	1090.12904	0.689521342	0	0.087382224	0	1	0	4.137128055	4.026808167	351.5420099	14.47994819	28.18765717	6.205692082	12.0804245	2.068564027	12.0804245	3.447606712	8.053616334	0	0	8	574.13	148.75	894.25	11.7218627929688	32.2144660949707
445	23	2010-12-09	4	4	0	45	15	0	60	3	2	207	76	0	1	0	1	1	9	879.5047608	1090.12904	0.689521342	0	0.087382224	0	1	0	4.137128055	4.026808167	351.5420099	14.47994819	28.18765717	6.205692082	12.0804245	2.068564027	12.0804245	3.447606712	8.053616334	0	0	8	574.13	148.75	894.25	11.7218627929688	32.2144660949707
446	28	2010-12-01	1	3	0	6	31.5	8	45.5	2	2	207	69	1	0	0	1	1	9	875.0711037	1066.556794	0.715325688	4.167750163	0.087382224	0.087382224	1	1	5.722605504	8.335500326	288.8242349	15.02183945	29.17425114	6.437931192	12.50325049	2.145977064	12.50325049	3.57662844	8.335500326	0	0	8	447.75	35	954.25	12.1605367660522	33.3420028686523
447	28	2010-12-01	2	3	0	4.66666650772095	37.6666679382324	17.6666660308838	60	3	2	207	69	1	0	0	1	1	9	875.0711037	1066.556794	0.715325688	4.167750163	0.087382224	0.087382224	1	1	5.722605504	8.335500326	288.8242349	15.02183945	29.17425114	6.437931192	12.50325049	2.145977064	12.50325049	3.57662844	8.335500326	0	0	8	447.75	35	954.25	12.1605367660522	33.3420028686523
448	28	2010-12-01	3	3	0	37.8333320617676	21.6666660308838	0.5	60	3	2	207	69	1	0	0	1	1	9	875.0711037	1066.556794	0.715325688	4.167750163	0.087382224	0.087382224	1	1	5.722605504	8.335500326	288.8242349	15.02183945	29.17425114	6.437931192	12.50325049	2.145977064	12.50325049	3.57662844	8.335500326	0	0	8	447.75	35	954.25	12.1605367660522	33.3420028686523
449	28	2010-12-01	4	3	0	31.2000007629395	27.6000003814697	1.20000004768372	60	3	2	207	69	1	0	0	1	1	9	875.0711037	1066.556794	0.715325688	4.167750163	0.087382224	0.087382224	1	1	5.722605504	8.335500326	288.8242349	15.02183945	29.17425114	6.437931192	12.50325049	2.145977064	12.50325049	3.57662844	8.335500326	0	0	8	447.75	35	954.25	12.1605367660522	33.3420028686523
450	28	2010-12-02	0	4	0	30.5	23	1	54.5	2	2	207	69	1	0	0	1	1	9	875.0711037	1066.556794	0.715325688	4.167750163	0.087382224	0.087382224	1	1	5.722605504	8.335500326	288.8242349	15.02183945	29.17425114	6.437931192	12.50325049	2.145977064	12.50325049	3.57662844	8.335500326	0	0	8	447.75	35	954.25	12.1605367660522	33.3420028686523
451	28	2010-12-02	1	4	0	39	20	0.25	59.25	3	2	207	69	1	0	0	1	1	9	875.0711037	1066.556794	0.715325688	4.167750163	0.087382224	0.087382224	1	1	5.722605504	8.335500326	288.8242349	15.02183945	29.17425114	6.437931192	12.50325049	2.145977064	12.50325049	3.57662844	8.335500326	0	0	8	447.75	35	954.25	12.1605367660522	33.3420028686523
452	28	2010-12-02	2	4	0	40.3333320617676	18.3333339691162	1.33333337306976	60	3	2	207	69	1	0	0	1	1	9	875.0711037	1066.556794	0.715325688	4.167750163	0.087382224	0.087382224	1	1	5.722605504	8.335500326	288.8242349	15.02183945	29.17425114	6.437931192	12.50325049	2.145977064	12.50325049	3.57662844	8.335500326	0	0	8	447.75	35	954.25	12.1605367660522	33.3420028686523
453	28	2010-12-02	3	4	0	42	17.6666660308838	0.333333343267441	60	3	2	207	69	1	0	0	1	1	9	875.0711037	1066.556794	0.715325688	4.167750163	0.087382224	0.087382224	1	1	5.722605504	8.335500326	288.8242349	15.02183945	29.17425114	6.437931192	12.50325049	2.145977064	12.50325049	3.57662844	8.335500326	0	0	8	447.75	35	954.25	12.1605367660522	33.3420028686523
454	28	2010-12-02	4	4	0	38.5	21	0.5	60	3	2	207	69	1	0	0	1	1	9	875.0711037	1066.556794	0.715325688	4.167750163	0.087382224	0.087382224	1	1	5.722605504	8.335500326	288.8242349	15.02183945	29.17425114	6.437931192	12.50325049	2.145977064	12.50325049	3.57662844	8.335500326	0	0	8	447.75	35	954.25	12.1605367660522	33.3420028686523
455	28	2010-12-03	1	5	0	34	22	4	60	2	2	207	69	1	0	0	1	1	9	875.0711037	1066.556794	0.715325688	4.167750163	0.087382224	0.087382224	1	1	5.722605504	8.335500326	288.8242349	15.02183945	29.17425114	6.437931192	12.50325049	2.145977064	12.50325049	3.57662844	8.335500326	0	0	8	447.75	35	954.25	12.1605367660522	33.3420028686523
456	28	2010-12-03	2	5	0	31.3333339691162	28	0.666666686534882	60	3	2	207	69	1	0	0	1	1	9	875.0711037	1066.556794	0.715325688	4.167750163	0.087382224	0.087382224	1	1	5.722605504	8.335500326	288.8242349	15.02183945	29.17425114	6.437931192	12.50325049	2.145977064	12.50325049	3.57662844	8.335500326	0	0	8	447.75	35	954.25	12.1605367660522	33.3420028686523
457	28	2010-12-03	3	5	0	37.3333320617676	21.3333339691162	1.33333337306976	60	3	2	207	69	1	0	0	1	1	9	875.0711037	1066.556794	0.715325688	4.167750163	0.087382224	0.087382224	1	1	5.722605504	8.335500326	288.8242349	15.02183945	29.17425114	6.437931192	12.50325049	2.145977064	12.50325049	3.57662844	8.335500326	0	0	8	447.75	35	954.25	12.1605367660522	33.3420028686523
458	28	2010-12-03	4	5	0	33	26.3333339691162	0.666666686534882	60	3	2	207	69	1	0	0	1	1	9	875.0711037	1066.556794	0.715325688	4.167750163	0.087382224	0.087382224	1	1	5.722605504	8.335500326	288.8242349	15.02183945	29.17425114	6.437931192	12.50325049	2.145977064	12.50325049	3.57662844	8.335500326	0	0	8	447.75	35	954.25	12.1605367660522	33.3420028686523
459	28	2010-12-05	0	0	1	59	0	1	60	1	2	207	69	1	0	0	1	1	9	875.0711037	1066.556794	0.715325688	4.167750163	0.087382224	0.087382224	1	1	5.722605504	8.335500326	288.8242349	15.02183945	29.17425114	6.437931192	12.50325049	2.145977064	12.50325049	3.57662844	8.335500326	0	0	8	447.75	35	954.25	12.1605367660522	33.3420028686523
460	28	2010-12-05	1	0	1	38.6666679382324	21.3333339691162	0	60	3	2	207	69	1	0	0	1	1	9	875.0711037	1066.556794	0.715325688	4.167750163	0.087382224	0.087382224	1	1	5.722605504	8.335500326	288.8242349	15.02183945	29.17425114	6.437931192	12.50325049	2.145977064	12.50325049	3.57662844	8.335500326	0	0	8	447.75	35	954.25	12.1605367660522	33.3420028686523
461	28	2010-12-05	2	0	1	28.6666660308838	25.3333339691162	6	60	3	2	207	69	1	0	0	1	1	9	875.0711037	1066.556794	0.715325688	4.167750163	0.087382224	0.087382224	1	1	5.722605504	8.335500326	288.8242349	15.02183945	29.17425114	6.437931192	12.50325049	2.145977064	12.50325049	3.57662844	8.335500326	0	0	8	447.75	35	954.25	12.1605367660522	33.3420028686523
462	28	2010-12-05	3	0	1	1	13	46	60	1	2	207	69	1	0	0	1	1	9	875.0711037	1066.556794	0.715325688	4.167750163	0.087382224	0.087382224	1	1	5.722605504	8.335500326	288.8242349	15.02183945	29.17425114	6.437931192	12.50325049	2.145977064	12.50325049	3.57662844	8.335500326	0	0	8	447.75	35	954.25	12.1605367660522	33.3420028686523
463	28	2010-12-06	0	1	0	0	11	1	12	1	2	207	69	1	0	0	1	1	9	875.0711037	1066.556794	0.715325688	4.167750163	0.087382224	0.087382224	1	1	5.722605504	8.335500326	288.8242349	15.02183945	29.17425114	6.437931192	12.50325049	2.145977064	12.50325049	3.57662844	8.335500326	0	0	8	447.75	35	954.25	12.1605367660522	33.3420028686523
464	28	2010-12-06	1	1	0	19.3333339691162	39.3333320617676	1.33333337306976	60	3	2	207	69	1	0	0	1	1	9	875.0711037	1066.556794	0.715325688	4.167750163	0.087382224	0.087382224	1	1	5.722605504	8.335500326	288.8242349	15.02183945	29.17425114	6.437931192	12.50325049	2.145977064	12.50325049	3.57662844	8.335500326	0	0	8	447.75	35	954.25	12.1605367660522	33.3420028686523
465	28	2010-12-06	2	1	0	47.3333320617676	12.3333330154419	0.333333343267441	60	3	2	207	69	1	0	0	1	1	9	875.0711037	1066.556794	0.715325688	4.167750163	0.087382224	0.087382224	1	1	5.722605504	8.335500326	288.8242349	15.02183945	29.17425114	6.437931192	12.50325049	2.145977064	12.50325049	3.57662844	8.335500326	0	0	8	447.75	35	954.25	12.1605367660522	33.3420028686523
466	28	2010-12-06	3	1	0	42	17.7999992370605	0.200000002980232	60	3	2	207	69	1	0	0	1	1	9	875.0711037	1066.556794	0.715325688	4.167750163	0.087382224	0.087382224	1	1	5.722605504	8.335500326	288.8242349	15.02183945	29.17425114	6.437931192	12.50325049	2.145977064	12.50325049	3.57662844	8.335500326	0	0	8	447.75	35	954.25	12.1605367660522	33.3420028686523
467	28	2010-12-06	4	1	0	34	24	2	60	3	2	207	69	1	0	0	1	1	9	875.0711037	1066.556794	0.715325688	4.167750163	0.087382224	0.087382224	1	1	5.722605504	8.335500326	288.8242349	15.02183945	29.17425114	6.437931192	12.50325049	2.145977064	12.50325049	3.57662844	8.335500326	0	0	8	447.75	35	954.25	12.1605367660522	33.3420028686523
468	28	2010-12-07	0	2	0	4	10	0	14	1	2	207	69	1	0	0	1	1	9	875.0711037	1066.556794	0.715325688	4.167750163	0.087382224	0.087382224	1	1	5.722605504	8.335500326	288.8242349	15.02183945	29.17425114	6.437931192	12.50325049	2.145977064	12.50325049	3.57662844	8.335500326	0	0	8	447.75	35	954.25	12.1605367660522	33.3420028686523
469	28	2010-12-07	1	2	0	41.6666679382324	18	0.333333343267441	60	3	2	207	69	1	0	0	1	1	9	875.0711037	1066.556794	0.715325688	4.167750163	0.087382224	0.087382224	1	1	5.722605504	8.335500326	288.8242349	15.02183945	29.17425114	6.437931192	12.50325049	2.145977064	12.50325049	3.57662844	8.335500326	0	0	8	447.75	35	954.25	12.1605367660522	33.3420028686523
470	28	2010-12-07	2	2	0	30	29.6666660308838	0.333333343267441	60	3	2	207	69	1	0	0	1	1	9	875.0711037	1066.556794	0.715325688	4.167750163	0.087382224	0.087382224	1	1	5.722605504	8.335500326	288.8242349	15.02183945	29.17425114	6.437931192	12.50325049	2.145977064	12.50325049	3.57662844	8.335500326	0	0	8	447.75	35	954.25	12.1605367660522	33.3420028686523
471	28	2010-12-07	3	2	0	40.3333320617676	18.6666660308838	1	60	3	2	207	69	1	0	0	1	1	9	875.0711037	1066.556794	0.715325688	4.167750163	0.087382224	0.087382224	1	1	5.722605504	8.335500326	288.8242349	15.02183945	29.17425114	6.437931192	12.50325049	2.145977064	12.50325049	3.57662844	8.335500326	0	0	8	447.75	35	954.25	12.1605367660522	33.3420028686523
472	28	2010-12-07	4	2	0	42.3333320617676	17.6666660308838	0	60	3	2	207	69	1	0	0	1	1	9	875.0711037	1066.556794	0.715325688	4.167750163	0.087382224	0.087382224	1	1	5.722605504	8.335500326	288.8242349	15.02183945	29.17425114	6.437931192	12.50325049	2.145977064	12.50325049	3.57662844	8.335500326	0	0	8	447.75	35	954.25	12.1605367660522	33.3420028686523
473	28	2010-12-08	0	3	0	0	9	0	9	1	2	207	69	1	0	0	1	1	9	875.0711037	1066.556794	0.715325688	4.167750163	0.087382224	0.087382224	1	1	5.722605504	8.335500326	288.8242349	15.02183945	29.17425114	6.437931192	12.50325049	2.145977064	12.50325049	3.57662844	8.335500326	0	0	8	447.75	35	954.25	12.1605367660522	33.3420028686523
474	28	2010-12-08	1	3	0	24	28.3333339691162	1.16666662693024	53.5	3	2	207	69	1	0	0	1	1	9	875.0711037	1066.556794	0.715325688	4.167750163	0.087382224	0.087382224	1	1	5.722605504	8.335500326	288.8242349	15.02183945	29.17425114	6.437931192	12.50325049	2.145977064	12.50325049	3.57662844	8.335500326	0	0	8	447.75	35	954.25	12.1605367660522	33.3420028686523
475	28	2010-12-08	2	3	0	38.8333320617676	21	0.16666667163372	60	3	2	207	69	1	0	0	1	1	9	875.0711037	1066.556794	0.715325688	4.167750163	0.087382224	0.087382224	1	1	5.722605504	8.335500326	288.8242349	15.02183945	29.17425114	6.437931192	12.50325049	2.145977064	12.50325049	3.57662844	8.335500326	0	0	8	447.75	35	954.25	12.1605367660522	33.3420028686523
476	28	2010-12-08	3	3	0	23	36.6666679382324	0.333333343267441	60	3	2	207	69	1	0	0	1	1	9	875.0711037	1066.556794	0.715325688	4.167750163	0.087382224	0.087382224	1	1	5.722605504	8.335500326	288.8242349	15.02183945	29.17425114	6.437931192	12.50325049	2.145977064	12.50325049	3.57662844	8.335500326	0	0	8	447.75	35	954.25	12.1605367660522	33.3420028686523
477	28	2010-12-08	4	3	0	41	18.3333339691162	0.666666686534882	60	3	2	207	69	1	0	0	1	1	9	875.0711037	1066.556794	0.715325688	4.167750163	0.087382224	0.087382224	1	1	5.722605504	8.335500326	288.8242349	15.02183945	29.17425114	6.437931192	12.50325049	2.145977064	12.50325049	3.57662844	8.335500326	0	0	8	447.75	35	954.25	12.1605367660522	33.3420028686523
478	32	2010-12-01	0	3	0	37	23	0	60	1	2	207	70	1	1	1	1	1	10	892.8488221	1129.61513	0.77418675	5.15226782	0.087382224	0.087382224	1	1	6.193493999	10.30453564	266.0728929	14.70954825	30.91360692	6.967680749	15.45680346	2.32256025	10.30453564	3.87093375	5.15226782	0	0	5	318.4	34.6	708.4	13.1611747741699	30.9136066436768
479	32	2010-12-01	1	3	0	37.3333320617676	20	2.66666674613953	60	3	2	207	70	1	1	1	1	1	10	892.8488221	1129.61513	0.77418675	5.15226782	0.087382224	0.087382224	1	1	6.193493999	10.30453564	266.0728929	14.70954825	30.91360692	6.967680749	15.45680346	2.32256025	10.30453564	3.87093375	5.15226782	0	0	5	318.4	34.6	708.4	13.1611747741699	30.9136066436768
480	32	2010-12-01	2	3	0	31.3333339691162	28	0.666666686534882	60	3	2	207	70	1	1	1	1	1	10	892.8488221	1129.61513	0.77418675	5.15226782	0.087382224	0.087382224	1	1	6.193493999	10.30453564	266.0728929	14.70954825	30.91360692	6.967680749	15.45680346	2.32256025	10.30453564	3.87093375	5.15226782	0	0	5	318.4	34.6	708.4	13.1611747741699	30.9136066436768
481	32	2010-12-01	3	3	0	37.3333320617676	21.3333339691162	1.33333337306976	60	3	2	207	70	1	1	1	1	1	10	892.8488221	1129.61513	0.77418675	5.15226782	0.087382224	0.087382224	1	1	6.193493999	10.30453564	266.0728929	14.70954825	30.91360692	6.967680749	15.45680346	2.32256025	10.30453564	3.87093375	5.15226782	0	0	5	318.4	34.6	708.4	13.1611747741699	30.9136066436768
482	32	2010-12-01	4	3	0	33	26.3333339691162	0.666666686534882	60	3	2	207	70	1	1	1	1	1	10	892.8488221	1129.61513	0.77418675	5.15226782	0.087382224	0.087382224	1	1	6.193493999	10.30453564	266.0728929	14.70954825	30.91360692	6.967680749	15.45680346	2.32256025	10.30453564	3.87093375	5.15226782	0	0	5	318.4	34.6	708.4	13.1611747741699	30.9136066436768
483	32	2010-12-03	0	5	0	59	0	1	60	1	2	207	70	1	1	1	1	1	10	892.8488221	1129.61513	0.77418675	5.15226782	0.087382224	0.087382224	1	1	6.193493999	10.30453564	266.0728929	14.70954825	30.91360692	6.967680749	15.45680346	2.32256025	10.30453564	3.87093375	5.15226782	0	0	5	318.4	34.6	708.4	13.1611747741699	30.9136066436768
484	32	2010-12-03	1	5	0	38.6666679382324	21.3333339691162	0	60	3	2	207	70	1	1	1	1	1	10	892.8488221	1129.61513	0.77418675	5.15226782	0.087382224	0.087382224	1	1	6.193493999	10.30453564	266.0728929	14.70954825	30.91360692	6.967680749	15.45680346	2.32256025	10.30453564	3.87093375	5.15226782	0	0	5	318.4	34.6	708.4	13.1611747741699	30.9136066436768
485	32	2010-12-03	2	5	0	27	27	6	60	1	2	207	70	1	1	1	1	1	10	892.8488221	1129.61513	0.77418675	5.15226782	0.087382224	0.087382224	1	1	6.193493999	10.30453564	266.0728929	14.70954825	30.91360692	6.967680749	15.45680346	2.32256025	10.30453564	3.87093375	5.15226782	0	0	5	318.4	34.6	708.4	13.1611747741699	30.9136066436768
486	32	2010-12-04	0	6	1	0	11	1	12	1	2	207	70	1	1	1	1	1	10	892.8488221	1129.61513	0.77418675	5.15226782	0.087382224	0.087382224	1	1	6.193493999	10.30453564	266.0728929	14.70954825	30.91360692	6.967680749	15.45680346	2.32256025	10.30453564	3.87093375	5.15226782	0	0	5	318.4	34.6	708.4	13.1611747741699	30.9136066436768
487	32	2010-12-04	1	6	1	19.3333339691162	39.3333320617676	1.33333337306976	60	3	2	207	70	1	1	1	1	1	10	892.8488221	1129.61513	0.77418675	5.15226782	0.087382224	0.087382224	1	1	6.193493999	10.30453564	266.0728929	14.70954825	30.91360692	6.967680749	15.45680346	2.32256025	10.30453564	3.87093375	5.15226782	0	0	5	318.4	34.6	708.4	13.1611747741699	30.9136066436768
488	32	2010-12-04	2	6	1	40.2000007629395	17.2000007629395	2.59999990463257	60	3	2	207	70	1	1	1	1	1	10	892.8488221	1129.61513	0.77418675	5.15226782	0.087382224	0.087382224	1	1	6.193493999	10.30453564	266.0728929	14.70954825	30.91360692	6.967680749	15.45680346	2.32256025	10.30453564	3.87093375	5.15226782	0	0	5	318.4	34.6	708.4	13.1611747741699	30.9136066436768
489	32	2010-12-04	3	6	1	32.5999984741211	18	9.39999961853027	60	3	2	207	70	1	1	1	1	1	10	892.8488221	1129.61513	0.77418675	5.15226782	0.087382224	0.087382224	1	1	6.193493999	10.30453564	266.0728929	14.70954825	30.91360692	6.967680749	15.45680346	2.32256025	10.30453564	3.87093375	5.15226782	0	0	5	318.4	34.6	708.4	13.1611747741699	30.9136066436768
490	32	2010-12-04	4	6	1	34	24	2	60	3	2	207	70	1	1	1	1	1	10	892.8488221	1129.61513	0.77418675	5.15226782	0.087382224	0.087382224	1	1	6.193493999	10.30453564	266.0728929	14.70954825	30.91360692	6.967680749	15.45680346	2.32256025	10.30453564	3.87093375	5.15226782	0	0	5	318.4	34.6	708.4	13.1611747741699	30.9136066436768
491	32	2010-12-05	0	0	1	4	10	0	14	1	2	207	70	1	1	1	1	1	10	892.8488221	1129.61513	0.77418675	5.15226782	0.087382224	0.087382224	1	1	6.193493999	10.30453564	266.0728929	14.70954825	30.91360692	6.967680749	15.45680346	2.32256025	10.30453564	3.87093375	5.15226782	0	0	5	318.4	34.6	708.4	13.1611747741699	30.9136066436768
492	32	2010-12-05	1	0	1	41.6666679382324	18	0.333333343267441	60	3	2	207	70	1	1	1	1	1	10	892.8488221	1129.61513	0.77418675	5.15226782	0.087382224	0.087382224	1	1	6.193493999	10.30453564	266.0728929	14.70954825	30.91360692	6.967680749	15.45680346	2.32256025	10.30453564	3.87093375	5.15226782	0	0	5	318.4	34.6	708.4	13.1611747741699	30.9136066436768
493	32	2010-12-05	2	0	1	30	29.6666660308838	0.333333343267441	60	3	2	207	70	1	1	1	1	1	10	892.8488221	1129.61513	0.77418675	5.15226782	0.087382224	0.087382224	1	1	6.193493999	10.30453564	266.0728929	14.70954825	30.91360692	6.967680749	15.45680346	2.32256025	10.30453564	3.87093375	5.15226782	0	0	5	318.4	34.6	708.4	13.1611747741699	30.9136066436768
494	32	2010-12-05	3	0	1	42.25	17	0.75	60	3	2	207	70	1	1	1	1	1	10	892.8488221	1129.61513	0.77418675	5.15226782	0.087382224	0.087382224	1	1	6.193493999	10.30453564	266.0728929	14.70954825	30.91360692	6.967680749	15.45680346	2.32256025	10.30453564	3.87093375	5.15226782	0	0	5	318.4	34.6	708.4	13.1611747741699	30.9136066436768
495	32	2010-12-05	4	0	1	40.7999992370605	19.2000007629395	0	60	3	2	207	70	1	1	1	1	1	10	892.8488221	1129.61513	0.77418675	5.15226782	0.087382224	0.087382224	1	1	6.193493999	10.30453564	266.0728929	14.70954825	30.91360692	6.967680749	15.45680346	2.32256025	10.30453564	3.87093375	5.15226782	0	0	5	318.4	34.6	708.4	13.1611747741699	30.9136066436768
496	32	2010-12-06	0	1	0	0	9	0	9	1	2	207	70	1	1	1	1	1	10	892.8488221	1129.61513	0.77418675	5.15226782	0.087382224	0.087382224	1	1	6.193493999	10.30453564	266.0728929	14.70954825	30.91360692	6.967680749	15.45680346	2.32256025	10.30453564	3.87093375	5.15226782	0	0	5	318.4	34.6	708.4	13.1611747741699	30.9136066436768
497	32	2010-12-06	1	1	0	23.5	25.5	1.25	50.25	3	2	207	70	1	1	1	1	1	10	892.8488221	1129.61513	0.77418675	5.15226782	0.087382224	0.087382224	1	1	6.193493999	10.30453564	266.0728929	14.70954825	30.91360692	6.967680749	15.45680346	2.32256025	10.30453564	3.87093375	5.15226782	0	0	5	318.4	34.6	708.4	13.1611747741699	30.9136066436768
498	32	2010-12-06	2	1	0	33	27	0	60	3	2	207	70	1	1	1	1	1	10	892.8488221	1129.61513	0.77418675	5.15226782	0.087382224	0.087382224	1	1	6.193493999	10.30453564	266.0728929	14.70954825	30.91360692	6.967680749	15.45680346	2.32256025	10.30453564	3.87093375	5.15226782	0	0	5	318.4	34.6	708.4	13.1611747741699	30.9136066436768
499	32	2010-12-06	3	1	0	23	36.6666679382324	0.333333343267441	60	3	2	207	70	1	1	1	1	1	10	892.8488221	1129.61513	0.77418675	5.15226782	0.087382224	0.087382224	1	1	6.193493999	10.30453564	266.0728929	14.70954825	30.91360692	6.967680749	15.45680346	2.32256025	10.30453564	3.87093375	5.15226782	0	0	5	318.4	34.6	708.4	13.1611747741699	30.9136066436768
500	32	2010-12-06	4	1	0	43.25	16.25	0.5	60	3	2	207	70	1	1	1	1	1	10	892.8488221	1129.61513	0.77418675	5.15226782	0.087382224	0.087382224	1	1	6.193493999	10.30453564	266.0728929	14.70954825	30.91360692	6.967680749	15.45680346	2.32256025	10.30453564	3.87093375	5.15226782	0	0	5	318.4	34.6	708.4	13.1611747741699	30.9136066436768
501	32	2010-12-07	1	2	0	15.5	32.75	4.5	52.75	3	2	207	70	1	1	1	1	1	10	892.8488221	1129.61513	0.77418675	5.15226782	0.087382224	0.087382224	1	1	6.193493999	10.30453564	266.0728929	14.70954825	30.91360692	6.967680749	15.45680346	2.32256025	10.30453564	3.87093375	5.15226782	0	0	5	318.4	34.6	708.4	13.1611747741699	30.9136066436768
502	32	2010-12-07	2	2	0	24.6666660308838	26.3333339691162	9	60	3	2	207	70	1	1	1	1	1	10	892.8488221	1129.61513	0.77418675	5.15226782	0.087382224	0.087382224	1	1	6.193493999	10.30453564	266.0728929	14.70954825	30.91360692	6.967680749	15.45680346	2.32256025	10.30453564	3.87093375	5.15226782	0	0	5	318.4	34.6	708.4	13.1611747741699	30.9136066436768
503	32	2010-12-07	3	2	0	45.6666679382324	14.3333330154419	0	60	3	2	207	70	1	1	1	1	1	10	892.8488221	1129.61513	0.77418675	5.15226782	0.087382224	0.087382224	1	1	6.193493999	10.30453564	266.0728929	14.70954825	30.91360692	6.967680749	15.45680346	2.32256025	10.30453564	3.87093375	5.15226782	0	0	5	318.4	34.6	708.4	13.1611747741699	30.9136066436768
504	32	2010-12-07	4	2	0	34.3333320617676	25.3333339691162	0.333333343267441	60	3	2	207	70	1	1	1	1	1	10	892.8488221	1129.61513	0.77418675	5.15226782	0.087382224	0.087382224	1	1	6.193493999	10.30453564	266.0728929	14.70954825	30.91360692	6.967680749	15.45680346	2.32256025	10.30453564	3.87093375	5.15226782	0	0	5	318.4	34.6	708.4	13.1611747741699	30.9136066436768
505	32	2010-12-08	0	3	0	24	23	2	49	1	2	207	70	1	1	1	1	1	10	892.8488221	1129.61513	0.77418675	5.15226782	0.087382224	0.087382224	1	1	6.193493999	10.30453564	266.0728929	14.70954825	30.91360692	6.967680749	15.45680346	2.32256025	10.30453564	3.87093375	5.15226782	0	0	5	318.4	34.6	708.4	13.1611747741699	30.9136066436768
506	32	2010-12-08	1	3	0	37.3333320617676	21.3333339691162	0.333333343267441	59	3	2	207	70	1	1	1	1	1	10	892.8488221	1129.61513	0.77418675	5.15226782	0.087382224	0.087382224	1	1	6.193493999	10.30453564	266.0728929	14.70954825	30.91360692	6.967680749	15.45680346	2.32256025	10.30453564	3.87093375	5.15226782	0	0	5	318.4	34.6	708.4	13.1611747741699	30.9136066436768
507	32	2010-12-08	2	3	0	40.3333320617676	18.3333339691162	1.33333337306976	60	3	2	207	70	1	1	1	1	1	10	892.8488221	1129.61513	0.77418675	5.15226782	0.087382224	0.087382224	1	1	6.193493999	10.30453564	266.0728929	14.70954825	30.91360692	6.967680749	15.45680346	2.32256025	10.30453564	3.87093375	5.15226782	0	0	5	318.4	34.6	708.4	13.1611747741699	30.9136066436768
508	32	2010-12-08	3	3	0	36	23.3333339691162	0.666666686534882	60	3	2	207	70	1	1	1	1	1	10	892.8488221	1129.61513	0.77418675	5.15226782	0.087382224	0.087382224	1	1	6.193493999	10.30453564	266.0728929	14.70954825	30.91360692	6.967680749	15.45680346	2.32256025	10.30453564	3.87093375	5.15226782	0	0	5	318.4	34.6	708.4	13.1611747741699	30.9136066436768
509	32	2010-12-08	4	3	0	34.5	24.3333339691162	1.16666662693024	60	3	2	207	70	1	1	1	1	1	10	892.8488221	1129.61513	0.77418675	5.15226782	0.087382224	0.087382224	1	1	6.193493999	10.30453564	266.0728929	14.70954825	30.91360692	6.967680749	15.45680346	2.32256025	10.30453564	3.87093375	5.15226782	0	0	5	318.4	34.6	708.4	13.1611747741699	30.9136066436768
510	33	2010-12-01	0	3	0	59	0	1	60	1	2	207	71	0	1	0	1	1	12	875.0284267	1084.406933	0.568658348	0	0.087382224	0	1	0	3.411950086	0	544.7688991	14.21645869	28.62678212	4.549266782	9.542260706	1.705975043	9.542260706	3.411950086	12.72301427	0	0	8	434.75	10	878	9.66719150543213	31.8075351715088
511	33	2010-12-01	1	3	0	41.5	18.5	0	60	2	2	207	71	0	1	0	1	1	12	875.0284267	1084.406933	0.568658348	0	0.087382224	0	1	0	3.411950086	0	544.7688991	14.21645869	28.62678212	4.549266782	9.542260706	1.705975043	9.542260706	3.411950086	12.72301427	0	0	8	434.75	10	878	9.66719150543213	31.8075351715088
512	33	2010-12-02	0	4	0	0	11	1	12	1	2	207	71	0	1	0	1	1	12	875.0284267	1084.406933	0.568658348	0	0.087382224	0	1	0	3.411950086	0	544.7688991	14.21645869	28.62678212	4.549266782	9.542260706	1.705975043	9.542260706	3.411950086	12.72301427	0	0	8	434.75	10	878	9.66719150543213	31.8075351715088
513	33	2010-12-02	1	4	0	22.75	36.25	1	60	3	2	207	71	0	1	0	1	1	12	875.0284267	1084.406933	0.568658348	0	0.087382224	0	1	0	3.411950086	0	544.7688991	14.21645869	28.62678212	4.549266782	9.542260706	1.705975043	9.542260706	3.411950086	12.72301427	0	0	8	434.75	10	878	9.66719150543213	31.8075351715088
514	33	2010-12-02	2	4	0	34	22.2000007629395	3.79999995231628	60	3	2	207	71	0	1	0	1	1	12	875.0284267	1084.406933	0.568658348	0	0.087382224	0	1	0	3.411950086	0	544.7688991	14.21645869	28.62678212	4.549266782	9.542260706	1.705975043	9.542260706	3.411950086	12.72301427	0	0	8	434.75	10	878	9.66719150543213	31.8075351715088
515	33	2010-12-02	3	4	0	24.3333339691162	20	15.6666669845581	60	3	2	207	71	0	1	0	1	1	12	875.0284267	1084.406933	0.568658348	0	0.087382224	0	1	0	3.411950086	0	544.7688991	14.21645869	28.62678212	4.549266782	9.542260706	1.705975043	9.542260706	3.411950086	12.72301427	0	0	8	434.75	10	878	9.66719150543213	31.8075351715088
516	33	2010-12-02	4	4	0	34	24	2	60	3	2	207	71	0	1	0	1	1	12	875.0284267	1084.406933	0.568658348	0	0.087382224	0	1	0	3.411950086	0	544.7688991	14.21645869	28.62678212	4.549266782	9.542260706	1.705975043	9.542260706	3.411950086	12.72301427	0	0	8	434.75	10	878	9.66719150543213	31.8075351715088
517	33	2010-12-03	0	5	0	4	10	0	14	1	2	207	71	0	1	0	1	1	12	875.0284267	1084.406933	0.568658348	0	0.087382224	0	1	0	3.411950086	0	544.7688991	14.21645869	28.62678212	4.549266782	9.542260706	1.705975043	9.542260706	3.411950086	12.72301427	0	0	8	434.75	10	878	9.66719150543213	31.8075351715088
518	33	2010-12-03	1	5	0	41.6666679382324	18	0.333333343267441	60	3	2	207	71	0	1	0	1	1	12	875.0284267	1084.406933	0.568658348	0	0.087382224	0	1	0	3.411950086	0	544.7688991	14.21645869	28.62678212	4.549266782	9.542260706	1.705975043	9.542260706	3.411950086	12.72301427	0	0	8	434.75	10	878	9.66719150543213	31.8075351715088
519	33	2010-12-03	2	5	0	37	22.75	0.25	60	3	2	207	71	0	1	0	1	1	12	875.0284267	1084.406933	0.568658348	0	0.087382224	0	1	0	3.411950086	0	544.7688991	14.21645869	28.62678212	4.549266782	9.542260706	1.705975043	9.542260706	3.411950086	12.72301427	0	0	8	434.75	10	878	9.66719150543213	31.8075351715088
520	33	2010-12-03	3	5	0	41.5999984741211	17.7999992370605	0.600000023841858	60	3	2	207	71	0	1	0	1	1	12	875.0284267	1084.406933	0.568658348	0	0.087382224	0	1	0	3.411950086	0	544.7688991	14.21645869	28.62678212	4.549266782	9.542260706	1.705975043	9.542260706	3.411950086	12.72301427	0	0	8	434.75	10	878	9.66719150543213	31.8075351715088
521	33	2010-12-03	4	5	0	45	15	0	60	3	2	207	71	0	1	0	1	1	12	875.0284267	1084.406933	0.568658348	0	0.087382224	0	1	0	3.411950086	0	544.7688991	14.21645869	28.62678212	4.549266782	9.542260706	1.705975043	9.542260706	3.411950086	12.72301427	0	0	8	434.75	10	878	9.66719150543213	31.8075351715088
522	33	2010-12-04	0	6	1	0	9	0	9	1	2	207	71	0	1	0	1	1	12	875.0284267	1084.406933	0.568658348	0	0.087382224	0	1	0	3.411950086	0	544.7688991	14.21645869	28.62678212	4.549266782	9.542260706	1.705975043	9.542260706	3.411950086	12.72301427	0	0	8	434.75	10	878	9.66719150543213	31.8075351715088
523	33	2010-12-04	1	6	1	30.3333339691162	29.3333339691162	0.333333343267441	60	3	2	207	71	0	1	0	1	1	12	875.0284267	1084.406933	0.568658348	0	0.087382224	0	1	0	3.411950086	0	544.7688991	14.21645869	28.62678212	4.549266782	9.542260706	1.705975043	9.542260706	3.411950086	12.72301427	0	0	8	434.75	10	878	9.66719150543213	31.8075351715088
524	33	2010-12-04	2	6	1	33	27	0	60	3	2	207	71	0	1	0	1	1	12	875.0284267	1084.406933	0.568658348	0	0.087382224	0	1	0	3.411950086	0	544.7688991	14.21645869	28.62678212	4.549266782	9.542260706	1.705975043	9.542260706	3.411950086	12.72301427	0	0	8	434.75	10	878	9.66719150543213	31.8075351715088
525	33	2010-12-04	3	6	1	30	29.75	0.25	60	3	2	207	71	0	1	0	1	1	12	875.0284267	1084.406933	0.568658348	0	0.087382224	0	1	0	3.411950086	0	544.7688991	14.21645869	28.62678212	4.549266782	9.542260706	1.705975043	9.542260706	3.411950086	12.72301427	0	0	8	434.75	10	878	9.66719150543213	31.8075351715088
526	33	2010-12-04	4	6	1	40.3333320617676	19.3333339691162	0.333333343267441	60	3	2	207	71	0	1	0	1	1	12	875.0284267	1084.406933	0.568658348	0	0.087382224	0	1	0	3.411950086	0	544.7688991	14.21645869	28.62678212	4.549266782	9.542260706	1.705975043	9.542260706	3.411950086	12.72301427	0	0	8	434.75	10	878	9.66719150543213	31.8075351715088
527	33	2010-12-05	1	0	1	13	29	4.40000009536743	46.4000015258789	3	2	207	71	0	1	0	1	1	12	875.0284267	1084.406933	0.568658348	0	0.087382224	0	1	0	3.411950086	0	544.7688991	14.21645869	28.62678212	4.549266782	9.542260706	1.705975043	9.542260706	3.411950086	12.72301427	0	0	8	434.75	10	878	9.66719150543213	31.8075351715088
528	33	2010-12-05	2	0	1	27	25.3999996185303	7.59999990463257	60	3	2	207	71	0	1	0	1	1	12	875.0284267	1084.406933	0.568658348	0	0.087382224	0	1	0	3.411950086	0	544.7688991	14.21645869	28.62678212	4.549266782	9.542260706	1.705975043	9.542260706	3.411950086	12.72301427	0	0	8	434.75	10	878	9.66719150543213	31.8075351715088
529	33	2010-12-05	3	0	1	45.6666679382324	14.3333330154419	0	60	3	2	207	71	0	1	0	1	1	12	875.0284267	1084.406933	0.568658348	0	0.087382224	0	1	0	3.411950086	0	544.7688991	14.21645869	28.62678212	4.549266782	9.542260706	1.705975043	9.542260706	3.411950086	12.72301427	0	0	8	434.75	10	878	9.66719150543213	31.8075351715088
530	33	2010-12-05	4	0	1	34.3333320617676	25.3333339691162	0.333333343267441	60	3	2	207	71	0	1	0	1	1	12	875.0284267	1084.406933	0.568658348	0	0.087382224	0	1	0	3.411950086	0	544.7688991	14.21645869	28.62678212	4.549266782	9.542260706	1.705975043	9.542260706	3.411950086	12.72301427	0	0	8	434.75	10	878	9.66719150543213	31.8075351715088
531	33	2010-12-06	1	1	0	37.3333320617676	21.3333339691162	0.333333343267441	59	3	2	207	71	0	1	0	1	1	12	875.0284267	1084.406933	0.568658348	0	0.087382224	0	1	0	3.411950086	0	544.7688991	14.21645869	28.62678212	4.549266782	9.542260706	1.705975043	9.542260706	3.411950086	12.72301427	0	0	8	434.75	10	878	9.66719150543213	31.8075351715088
532	33	2010-12-06	2	1	0	33.5	21.5	5	60	3	2	207	71	0	1	0	1	1	12	875.0284267	1084.406933	0.568658348	0	0.087382224	0	1	0	3.411950086	0	544.7688991	14.21645869	28.62678212	4.549266782	9.542260706	1.705975043	9.542260706	3.411950086	12.72301427	0	0	8	434.75	10	878	9.66719150543213	31.8075351715088
533	33	2010-12-06	3	1	0	33.5999984741211	25.7999992370605	0.600000023841858	60	3	2	207	71	0	1	0	1	1	12	875.0284267	1084.406933	0.568658348	0	0.087382224	0	1	0	3.411950086	0	544.7688991	14.21645869	28.62678212	4.549266782	9.542260706	1.705975043	9.542260706	3.411950086	12.72301427	0	0	8	434.75	10	878	9.66719150543213	31.8075351715088
534	33	2010-12-06	4	1	0	25.3333339691162	32.6666679382324	2	60	3	2	207	71	0	1	0	1	1	12	875.0284267	1084.406933	0.568658348	0	0.087382224	0	1	0	3.411950086	0	544.7688991	14.21645869	28.62678212	4.549266782	9.542260706	1.705975043	9.542260706	3.411950086	12.72301427	0	0	8	434.75	10	878	9.66719150543213	31.8075351715088
535	33	2010-12-07	0	2	0	30.5	23	1	54.5	2	2	207	71	0	1	0	1	1	12	875.0284267	1084.406933	0.568658348	0	0.087382224	0	1	0	3.411950086	0	544.7688991	14.21645869	28.62678212	4.549266782	9.542260706	1.705975043	9.542260706	3.411950086	12.72301427	0	0	8	434.75	10	878	9.66719150543213	31.8075351715088
536	33	2010-12-07	1	2	0	37.3333320617676	20	2.66666674613953	60	3	2	207	71	0	1	0	1	1	12	875.0284267	1084.406933	0.568658348	0	0.087382224	0	1	0	3.411950086	0	544.7688991	14.21645869	28.62678212	4.549266782	9.542260706	1.705975043	9.542260706	3.411950086	12.72301427	0	0	8	434.75	10	878	9.66719150543213	31.8075351715088
537	33	2010-12-07	2	2	0	31.3333339691162	28	0.666666686534882	60	3	2	207	71	0	1	0	1	1	12	875.0284267	1084.406933	0.568658348	0	0.087382224	0	1	0	3.411950086	0	544.7688991	14.21645869	28.62678212	4.549266782	9.542260706	1.705975043	9.542260706	3.411950086	12.72301427	0	0	8	434.75	10	878	9.66719150543213	31.8075351715088
538	33	2010-12-07	3	2	0	40	18.75	1.25	60	3	2	207	71	0	1	0	1	1	12	875.0284267	1084.406933	0.568658348	0	0.087382224	0	1	0	3.411950086	0	544.7688991	14.21645869	28.62678212	4.549266782	9.542260706	1.705975043	9.542260706	3.411950086	12.72301427	0	0	8	434.75	10	878	9.66719150543213	31.8075351715088
539	33	2010-12-07	4	2	0	41	18.5	0.5	60	3	2	207	71	0	1	0	1	1	12	875.0284267	1084.406933	0.568658348	0	0.087382224	0	1	0	3.411950086	0	544.7688991	14.21645869	28.62678212	4.549266782	9.542260706	1.705975043	9.542260706	3.411950086	12.72301427	0	0	8	434.75	10	878	9.66719150543213	31.8075351715088
540	33	2010-12-08	4	3	0	33	26.5	0.5	60	2	2	207	71	0	1	0	1	1	12	875.0284267	1084.406933	0.568658348	0	0.087382224	0	1	0	3.411950086	0	544.7688991	14.21645869	28.62678212	4.549266782	9.542260706	1.705975043	9.542260706	3.411950086	12.72301427	0	0	8	434.75	10	878	9.66719150543213	31.8075351715088
541	37	2010-12-01	0	3	0	4	10	0	14	1	2	207	78	0	0	0	1	1	10	892.7902768	1152.711043	0.735740717	5.098517308	0.087382224	0.087382224	1	1	5.885925733	10.19703462	311.2187622	15.45055505	35.68962116	6.621666449	15.29555192	2.20722215	10.19703462	3.678703583	10.19703462	0	0	8	463.5	13.63	864.5	12.5075922012329	35.6896209716797
542	37	2010-12-01	1	3	0	41.6666679382324	18	0.333333343267441	60	3	2	207	78	0	0	0	1	1	10	892.7902768	1152.711043	0.735740717	5.098517308	0.087382224	0.087382224	1	1	5.885925733	10.19703462	311.2187622	15.45055505	35.68962116	6.621666449	15.29555192	2.20722215	10.19703462	3.678703583	10.19703462	0	0	8	463.5	13.63	864.5	12.5075922012329	35.6896209716797
543	37	2010-12-01	2	3	0	38.6666679382324	21	0.333333343267441	60	3	2	207	78	0	0	0	1	1	10	892.7902768	1152.711043	0.735740717	5.098517308	0.087382224	0.087382224	1	1	5.885925733	10.19703462	311.2187622	15.45055505	35.68962116	6.621666449	15.29555192	2.20722215	10.19703462	3.678703583	10.19703462	0	0	8	463.5	13.63	864.5	12.5075922012329	35.6896209716797
544	37	2010-12-01	3	3	0	46	14	0	60	3	2	207	78	0	0	0	1	1	10	892.7902768	1152.711043	0.735740717	5.098517308	0.087382224	0.087382224	1	1	5.885925733	10.19703462	311.2187622	15.45055505	35.68962116	6.621666449	15.29555192	2.20722215	10.19703462	3.678703583	10.19703462	0	0	8	463.5	13.63	864.5	12.5075922012329	35.6896209716797
545	37	2010-12-01	4	3	0	45	15	0	60	3	2	207	78	0	0	0	1	1	10	892.7902768	1152.711043	0.735740717	5.098517308	0.087382224	0.087382224	1	1	5.885925733	10.19703462	311.2187622	15.45055505	35.68962116	6.621666449	15.29555192	2.20722215	10.19703462	3.678703583	10.19703462	0	0	8	463.5	13.63	864.5	12.5075922012329	35.6896209716797
546	37	2010-12-02	0	4	0	0	9	0	9	1	2	207	78	0	0	0	1	1	10	892.7902768	1152.711043	0.735740717	5.098517308	0.087382224	0.087382224	1	1	5.885925733	10.19703462	311.2187622	15.45055505	35.68962116	6.621666449	15.29555192	2.20722215	10.19703462	3.678703583	10.19703462	0	0	8	463.5	13.63	864.5	12.5075922012329	35.6896209716797
547	37	2010-12-02	1	4	0	30.3333339691162	29.3333339691162	0.333333343267441	60	3	2	207	78	0	0	0	1	1	10	892.7902768	1152.711043	0.735740717	5.098517308	0.087382224	0.087382224	1	1	5.885925733	10.19703462	311.2187622	15.45055505	35.68962116	6.621666449	15.29555192	2.20722215	10.19703462	3.678703583	10.19703462	0	0	8	463.5	13.63	864.5	12.5075922012329	35.6896209716797
548	37	2010-12-02	2	4	0	33	27	0	60	3	2	207	78	0	0	0	1	1	10	892.7902768	1152.711043	0.735740717	5.098517308	0.087382224	0.087382224	1	1	5.885925733	10.19703462	311.2187622	15.45055505	35.68962116	6.621666449	15.29555192	2.20722215	10.19703462	3.678703583	10.19703462	0	0	8	463.5	13.63	864.5	12.5075922012329	35.6896209716797
549	37	2010-12-02	3	4	0	31.6666660308838	27.6666660308838	0.666666686534882	60	3	2	207	78	0	0	0	1	1	10	892.7902768	1152.711043	0.735740717	5.098517308	0.087382224	0.087382224	1	1	5.885925733	10.19703462	311.2187622	15.45055505	35.68962116	6.621666449	15.29555192	2.20722215	10.19703462	3.678703583	10.19703462	0	0	8	463.5	13.63	864.5	12.5075922012329	35.6896209716797
550	37	2010-12-02	4	4	0	39.6666679382324	20.3333339691162	0	60	3	2	207	78	0	0	0	1	1	10	892.7902768	1152.711043	0.735740717	5.098517308	0.087382224	0.087382224	1	1	5.885925733	10.19703462	311.2187622	15.45055505	35.68962116	6.621666449	15.29555192	2.20722215	10.19703462	3.678703583	10.19703462	0	0	8	463.5	13.63	864.5	12.5075922012329	35.6896209716797
551	37	2010-12-03	1	5	0	14.5	26.5	2	43	3	2	207	78	0	0	0	1	1	10	892.7902768	1152.711043	0.735740717	5.098517308	0.087382224	0.087382224	1	1	5.885925733	10.19703462	311.2187622	15.45055505	35.68962116	6.621666449	15.29555192	2.20722215	10.19703462	3.678703583	10.19703462	0	0	8	463.5	13.63	864.5	12.5075922012329	35.6896209716797
552	37	2010-12-03	2	5	0	44.6666679382324	15	0.333333343267441	60	3	2	207	78	0	0	0	1	1	10	892.7902768	1152.711043	0.735740717	5.098517308	0.087382224	0.087382224	1	1	5.885925733	10.19703462	311.2187622	15.45055505	35.68962116	6.621666449	15.29555192	2.20722215	10.19703462	3.678703583	10.19703462	0	0	8	463.5	13.63	864.5	12.5075922012329	35.6896209716797
553	37	2010-12-03	3	5	0	45.6666679382324	14.3333330154419	0	60	3	2	207	78	0	0	0	1	1	10	892.7902768	1152.711043	0.735740717	5.098517308	0.087382224	0.087382224	1	1	5.885925733	10.19703462	311.2187622	15.45055505	35.68962116	6.621666449	15.29555192	2.20722215	10.19703462	3.678703583	10.19703462	0	0	8	463.5	13.63	864.5	12.5075922012329	35.6896209716797
554	37	2010-12-03	4	5	0	37.6666679382324	21.8333339691162	0.5	60	3	2	207	78	0	0	0	1	1	10	892.7902768	1152.711043	0.735740717	5.098517308	0.087382224	0.087382224	1	1	5.885925733	10.19703462	311.2187622	15.45055505	35.68962116	6.621666449	15.29555192	2.20722215	10.19703462	3.678703583	10.19703462	0	0	8	463.5	13.63	864.5	12.5075922012329	35.6896209716797
555	37	2010-12-04	1	6	1	29.75	25.75	3.75	59.25	3	2	207	78	0	0	0	1	1	10	892.7902768	1152.711043	0.735740717	5.098517308	0.087382224	0.087382224	1	1	5.885925733	10.19703462	311.2187622	15.45055505	35.68962116	6.621666449	15.29555192	2.20722215	10.19703462	3.678703583	10.19703462	0	0	8	463.5	13.63	864.5	12.5075922012329	35.6896209716797
556	37	2010-12-04	2	6	1	22.5	28	9.5	60	3	2	207	78	0	0	0	1	1	10	892.7902768	1152.711043	0.735740717	5.098517308	0.087382224	0.087382224	1	1	5.885925733	10.19703462	311.2187622	15.45055505	35.68962116	6.621666449	15.29555192	2.20722215	10.19703462	3.678703583	10.19703462	0	0	8	463.5	13.63	864.5	12.5075922012329	35.6896209716797
557	37	2010-12-04	3	6	1	31.5	27.75	0.75	60	3	2	207	78	0	0	0	1	1	10	892.7902768	1152.711043	0.735740717	5.098517308	0.087382224	0.087382224	1	1	5.885925733	10.19703462	311.2187622	15.45055505	35.68962116	6.621666449	15.29555192	2.20722215	10.19703462	3.678703583	10.19703462	0	0	8	463.5	13.63	864.5	12.5075922012329	35.6896209716797
558	37	2010-12-04	4	6	1	25.3333339691162	32.6666679382324	2	60	3	2	207	78	0	0	0	1	1	10	892.7902768	1152.711043	0.735740717	5.098517308	0.087382224	0.087382224	1	1	5.885925733	10.19703462	311.2187622	15.45055505	35.68962116	6.621666449	15.29555192	2.20722215	10.19703462	3.678703583	10.19703462	0	0	8	463.5	13.63	864.5	12.5075922012329	35.6896209716797
559	37	2010-12-05	0	0	1	30.5	23	1	54.5	2	2	207	78	0	0	0	1	1	10	892.7902768	1152.711043	0.735740717	5.098517308	0.087382224	0.087382224	1	1	5.885925733	10.19703462	311.2187622	15.45055505	35.68962116	6.621666449	15.29555192	2.20722215	10.19703462	3.678703583	10.19703462	0	0	8	463.5	13.63	864.5	12.5075922012329	35.6896209716797
560	37	2010-12-05	1	0	1	37.3333320617676	20	2.66666674613953	60	3	2	207	78	0	0	0	1	1	10	892.7902768	1152.711043	0.735740717	5.098517308	0.087382224	0.087382224	1	1	5.885925733	10.19703462	311.2187622	15.45055505	35.68962116	6.621666449	15.29555192	2.20722215	10.19703462	3.678703583	10.19703462	0	0	8	463.5	13.63	864.5	12.5075922012329	35.6896209716797
561	37	2010-12-05	2	0	1	31.3333339691162	28	0.666666686534882	60	3	2	207	78	0	0	0	1	1	10	892.7902768	1152.711043	0.735740717	5.098517308	0.087382224	0.087382224	1	1	5.885925733	10.19703462	311.2187622	15.45055505	35.68962116	6.621666449	15.29555192	2.20722215	10.19703462	3.678703583	10.19703462	0	0	8	463.5	13.63	864.5	12.5075922012329	35.6896209716797
562	37	2010-12-05	3	0	1	40.4000015258789	18.6000003814697	1	60	3	2	207	78	0	0	0	1	1	10	892.7902768	1152.711043	0.735740717	5.098517308	0.087382224	0.087382224	1	1	5.885925733	10.19703462	311.2187622	15.45055505	35.68962116	6.621666449	15.29555192	2.20722215	10.19703462	3.678703583	10.19703462	0	0	8	463.5	13.63	864.5	12.5075922012329	35.6896209716797
563	37	2010-12-05	4	0	1	43.6666679382324	16	0.333333343267441	60	3	2	207	78	0	0	0	1	1	10	892.7902768	1152.711043	0.735740717	5.098517308	0.087382224	0.087382224	1	1	5.885925733	10.19703462	311.2187622	15.45055505	35.68962116	6.621666449	15.29555192	2.20722215	10.19703462	3.678703583	10.19703462	0	0	8	463.5	13.63	864.5	12.5075922012329	35.6896209716797
564	37	2010-12-06	4	1	0	33	26.3333339691162	0.666666686534882	60	3	2	207	78	0	0	0	1	1	10	892.7902768	1152.711043	0.735740717	5.098517308	0.087382224	0.087382224	1	1	5.885925733	10.19703462	311.2187622	15.45055505	35.68962116	6.621666449	15.29555192	2.20722215	10.19703462	3.678703583	10.19703462	0	0	8	463.5	13.63	864.5	12.5075922012329	35.6896209716797
565	37	2010-12-08	0	3	0	29.5	5.5	1	36	2	2	207	78	0	0	0	1	1	10	892.7902768	1152.711043	0.735740717	5.098517308	0.087382224	0.087382224	1	1	5.885925733	10.19703462	311.2187622	15.45055505	35.68962116	6.621666449	15.29555192	2.20722215	10.19703462	3.678703583	10.19703462	0	0	8	463.5	13.63	864.5	12.5075922012329	35.6896209716797
566	37	2010-12-08	1	3	0	29	30.3333339691162	0.666666686534882	60	3	2	207	78	0	0	0	1	1	10	892.7902768	1152.711043	0.735740717	5.098517308	0.087382224	0.087382224	1	1	5.885925733	10.19703462	311.2187622	15.45055505	35.68962116	6.621666449	15.29555192	2.20722215	10.19703462	3.678703583	10.19703462	0	0	8	463.5	13.63	864.5	12.5075922012329	35.6896209716797
567	37	2010-12-08	2	3	0	28.6666660308838	25.3333339691162	6	60	3	2	207	78	0	0	0	1	1	10	892.7902768	1152.711043	0.735740717	5.098517308	0.087382224	0.087382224	1	1	5.885925733	10.19703462	311.2187622	15.45055505	35.68962116	6.621666449	15.29555192	2.20722215	10.19703462	3.678703583	10.19703462	0	0	8	463.5	13.63	864.5	12.5075922012329	35.6896209716797
568	37	2010-12-08	3	3	0	24.3333339691162	20	15.6666669845581	60	3	2	207	78	0	0	0	1	1	10	892.7902768	1152.711043	0.735740717	5.098517308	0.087382224	0.087382224	1	1	5.885925733	10.19703462	311.2187622	15.45055505	35.68962116	6.621666449	15.29555192	2.20722215	10.19703462	3.678703583	10.19703462	0	0	8	463.5	13.63	864.5	12.5075922012329	35.6896209716797
569	37	2010-12-08	4	3	0	34	24	2	60	3	2	207	78	0	0	0	1	1	10	892.7902768	1152.711043	0.735740717	5.098517308	0.087382224	0.087382224	1	1	5.885925733	10.19703462	311.2187622	15.45055505	35.68962116	6.621666449	15.29555192	2.20722215	10.19703462	3.678703583	10.19703462	0	0	8	463.5	13.63	864.5	12.5075922012329	35.6896209716797
570	38	2010-12-01	1	3	0	17.6666660308838	27.3333339691162	2	47	3	2	207	73	0	1	1	1	1	11	908.0707363	599.2627876	1.035745602	4.831730494	0.087382224	0.087382224	1	1	8.285964815	19.32692198	95.12704748	20.71491204	19.32692198	8.285964815	0	3.107236806	0	4.142982408	0	0	0	7	253.57	101.71	900.43	15.5361843109131	0
571	38	2010-12-01	2	3	0	44.6666679382324	15	0.333333343267441	60	3	2	207	73	0	1	1	1	1	11	908.0707363	599.2627876	1.035745602	4.831730494	0.087382224	0.087382224	1	1	8.285964815	19.32692198	95.12704748	20.71491204	19.32692198	8.285964815	0	3.107236806	0	4.142982408	0	0	0	7	253.57	101.71	900.43	15.5361843109131	0
572	38	2010-12-01	3	3	0	37	22.7999992370605	0.200000002980232	60	3	2	207	73	0	1	1	1	1	11	908.0707363	599.2627876	1.035745602	4.831730494	0.087382224	0.087382224	1	1	8.285964815	19.32692198	95.12704748	20.71491204	19.32692198	8.285964815	0	3.107236806	0	4.142982408	0	0	0	7	253.57	101.71	900.43	15.5361843109131	0
573	38	2010-12-01	4	3	0	37.4000015258789	22	0.600000023841858	60	3	2	207	73	0	1	1	1	1	11	908.0707363	599.2627876	1.035745602	4.831730494	0.087382224	0.087382224	1	1	8.285964815	19.32692198	95.12704748	20.71491204	19.32692198	8.285964815	0	3.107236806	0	4.142982408	0	0	0	7	253.57	101.71	900.43	15.5361843109131	0
574	38	2010-12-02	1	4	0	24.7999992370605	25.3999996185303	3.40000009536743	53.5999984741211	3	2	207	73	0	1	1	1	1	11	908.0707363	599.2627876	1.035745602	4.831730494	0.087382224	0.087382224	1	1	8.285964815	19.32692198	95.12704748	20.71491204	19.32692198	8.285964815	0	3.107236806	0	4.142982408	0	0	0	7	253.57	101.71	900.43	15.5361843109131	0
575	38	2010-12-02	2	4	0	17.5	29.25	13.25	60	3	2	207	73	0	1	1	1	1	11	908.0707363	599.2627876	1.035745602	4.831730494	0.087382224	0.087382224	1	1	8.285964815	19.32692198	95.12704748	20.71491204	19.32692198	8.285964815	0	3.107236806	0	4.142982408	0	0	0	7	253.57	101.71	900.43	15.5361843109131	0
576	38	2010-12-02	3	4	0	30	29	1	60	3	2	207	73	0	1	1	1	1	11	908.0707363	599.2627876	1.035745602	4.831730494	0.087382224	0.087382224	1	1	8.285964815	19.32692198	95.12704748	20.71491204	19.32692198	8.285964815	0	3.107236806	0	4.142982408	0	0	0	7	253.57	101.71	900.43	15.5361843109131	0
577	38	2010-12-02	4	4	0	28.75	29.75	1.5	60	3	2	207	73	0	1	1	1	1	11	908.0707363	599.2627876	1.035745602	4.831730494	0.087382224	0.087382224	1	1	8.285964815	19.32692198	95.12704748	20.71491204	19.32692198	8.285964815	0	3.107236806	0	4.142982408	0	0	0	7	253.57	101.71	900.43	15.5361843109131	0
578	38	2010-12-03	0	5	0	30.5	23	1	54.5	2	2	207	73	0	1	1	1	1	11	908.0707363	599.2627876	1.035745602	4.831730494	0.087382224	0.087382224	1	1	8.285964815	19.32692198	95.12704748	20.71491204	19.32692198	8.285964815	0	3.107236806	0	4.142982408	0	0	0	7	253.57	101.71	900.43	15.5361843109131	0
579	38	2010-12-03	1	5	0	37.3333320617676	20	2.66666674613953	60	3	2	207	73	0	1	1	1	1	11	908.0707363	599.2627876	1.035745602	4.831730494	0.087382224	0.087382224	1	1	8.285964815	19.32692198	95.12704748	20.71491204	19.32692198	8.285964815	0	3.107236806	0	4.142982408	0	0	0	7	253.57	101.71	900.43	15.5361843109131	0
580	38	2010-12-03	2	5	0	31.7999992370605	27	1.20000004768372	60	3	2	207	73	0	1	1	1	1	11	908.0707363	599.2627876	1.035745602	4.831730494	0.087382224	0.087382224	1	1	8.285964815	19.32692198	95.12704748	20.71491204	19.32692198	8.285964815	0	3.107236806	0	4.142982408	0	0	0	7	253.57	101.71	900.43	15.5361843109131	0
581	38	2010-12-03	3	5	0	42	17.6666660308838	0.333333343267441	60	3	2	207	73	0	1	1	1	1	11	908.0707363	599.2627876	1.035745602	4.831730494	0.087382224	0.087382224	1	1	8.285964815	19.32692198	95.12704748	20.71491204	19.32692198	8.285964815	0	3.107236806	0	4.142982408	0	0	0	7	253.57	101.71	900.43	15.5361843109131	0
582	38	2010-12-03	4	5	0	43.6666679382324	16	0.333333343267441	60	3	2	207	73	0	1	1	1	1	11	908.0707363	599.2627876	1.035745602	4.831730494	0.087382224	0.087382224	1	1	8.285964815	19.32692198	95.12704748	20.71491204	19.32692198	8.285964815	0	3.107236806	0	4.142982408	0	0	0	7	253.57	101.71	900.43	15.5361843109131	0
583	38	2010-12-04	3	6	1	37.3333320617676	21.3333339691162	1.33333337306976	60	3	2	207	73	0	1	1	1	1	11	908.0707363	599.2627876	1.035745602	4.831730494	0.087382224	0.087382224	1	1	8.285964815	19.32692198	95.12704748	20.71491204	19.32692198	8.285964815	0	3.107236806	0	4.142982408	0	0	0	7	253.57	101.71	900.43	15.5361843109131	0
584	38	2010-12-04	4	6	1	33	26.3333339691162	0.666666686534882	60	3	2	207	73	0	1	1	1	1	11	908.0707363	599.2627876	1.035745602	4.831730494	0.087382224	0.087382224	1	1	8.285964815	19.32692198	95.12704748	20.71491204	19.32692198	8.285964815	0	3.107236806	0	4.142982408	0	0	0	7	253.57	101.71	900.43	15.5361843109131	0
585	38	2010-12-06	0	1	0	59	0	1	60	1	2	207	73	0	1	1	1	1	11	908.0707363	599.2627876	1.035745602	4.831730494	0.087382224	0.087382224	1	1	8.285964815	19.32692198	95.12704748	20.71491204	19.32692198	8.285964815	0	3.107236806	0	4.142982408	0	0	0	7	253.57	101.71	900.43	15.5361843109131	0
586	38	2010-12-06	1	1	0	38.6666679382324	21.3333339691162	0	60	3	2	207	73	0	1	1	1	1	11	908.0707363	599.2627876	1.035745602	4.831730494	0.087382224	0.087382224	1	1	8.285964815	19.32692198	95.12704748	20.71491204	19.32692198	8.285964815	0	3.107236806	0	4.142982408	0	0	0	7	253.57	101.71	900.43	15.5361843109131	0
587	38	2010-12-06	2	1	0	28.6666660308838	25.3333339691162	6	60	3	2	207	73	0	1	1	1	1	11	908.0707363	599.2627876	1.035745602	4.831730494	0.087382224	0.087382224	1	1	8.285964815	19.32692198	95.12704748	20.71491204	19.32692198	8.285964815	0	3.107236806	0	4.142982408	0	0	0	7	253.57	101.71	900.43	15.5361843109131	0
588	38	2010-12-06	3	1	0	24.3333339691162	20	15.6666669845581	60	3	2	207	73	0	1	1	1	1	11	908.0707363	599.2627876	1.035745602	4.831730494	0.087382224	0.087382224	1	1	8.285964815	19.32692198	95.12704748	20.71491204	19.32692198	8.285964815	0	3.107236806	0	4.142982408	0	0	0	7	253.57	101.71	900.43	15.5361843109131	0
589	38	2010-12-06	4	1	0	35	24	1	60	2	2	207	73	0	1	1	1	1	11	908.0707363	599.2627876	1.035745602	4.831730494	0.087382224	0.087382224	1	1	8.285964815	19.32692198	95.12704748	20.71491204	19.32692198	8.285964815	0	3.107236806	0	4.142982408	0	0	0	7	253.57	101.71	900.43	15.5361843109131	0
590	38	2010-12-07	0	2	0	2	10.5	0.5	13	2	2	207	73	0	1	1	1	1	11	908.0707363	599.2627876	1.035745602	4.831730494	0.087382224	0.087382224	1	1	8.285964815	19.32692198	95.12704748	20.71491204	19.32692198	8.285964815	0	3.107236806	0	4.142982408	0	0	0	7	253.57	101.71	900.43	15.5361843109131	0
591	38	2010-12-07	1	2	0	24.75	34.25	1	60	3	2	207	73	0	1	1	1	1	11	908.0707363	599.2627876	1.035745602	4.831730494	0.087382224	0.087382224	1	1	8.285964815	19.32692198	95.12704748	20.71491204	19.32692198	8.285964815	0	3.107236806	0	4.142982408	0	0	0	7	253.57	101.71	900.43	15.5361843109131	0
592	38	2010-12-07	2	2	0	47.3333320617676	12.3333330154419	0.333333343267441	60	3	2	207	73	0	1	1	1	1	11	908.0707363	599.2627876	1.035745602	4.831730494	0.087382224	0.087382224	1	1	8.285964815	19.32692198	95.12704748	20.71491204	19.32692198	8.285964815	0	3.107236806	0	4.142982408	0	0	0	7	253.57	101.71	900.43	15.5361843109131	0
593	38	2010-12-07	3	2	0	46	14	0	60	3	2	207	73	0	1	1	1	1	11	908.0707363	599.2627876	1.035745602	4.831730494	0.087382224	0.087382224	1	1	8.285964815	19.32692198	95.12704748	20.71491204	19.32692198	8.285964815	0	3.107236806	0	4.142982408	0	0	0	7	253.57	101.71	900.43	15.5361843109131	0
594	38	2010-12-07	4	2	0	41.75	17.25	1	60	3	2	207	73	0	1	1	1	1	11	908.0707363	599.2627876	1.035745602	4.831730494	0.087382224	0.087382224	1	1	8.285964815	19.32692198	95.12704748	20.71491204	19.32692198	8.285964815	0	3.107236806	0	4.142982408	0	0	0	7	253.57	101.71	900.43	15.5361843109131	0
595	38	2010-12-08	0	3	0	0	9	0	9	1	2	207	73	0	1	1	1	1	11	908.0707363	599.2627876	1.035745602	4.831730494	0.087382224	0.087382224	1	1	8.285964815	19.32692198	95.12704748	20.71491204	19.32692198	8.285964815	0	3.107236806	0	4.142982408	0	0	0	7	253.57	101.71	900.43	15.5361843109131	0
596	38	2010-12-08	1	3	0	35	24.6000003814697	0.400000005960464	60	3	2	207	73	0	1	1	1	1	11	908.0707363	599.2627876	1.035745602	4.831730494	0.087382224	0.087382224	1	1	8.285964815	19.32692198	95.12704748	20.71491204	19.32692198	8.285964815	0	3.107236806	0	4.142982408	0	0	0	7	253.57	101.71	900.43	15.5361843109131	0
597	38	2010-12-08	2	3	0	31.5	28.3333339691162	0.16666667163372	60	3	2	207	73	0	1	1	1	1	11	908.0707363	599.2627876	1.035745602	4.831730494	0.087382224	0.087382224	1	1	8.285964815	19.32692198	95.12704748	20.71491204	19.32692198	8.285964815	0	3.107236806	0	4.142982408	0	0	0	7	253.57	101.71	900.43	15.5361843109131	0
598	38	2010-12-08	3	3	0	35.5	23.75	0.75	60	3	2	207	73	0	1	1	1	1	11	908.0707363	599.2627876	1.035745602	4.831730494	0.087382224	0.087382224	1	1	8.285964815	19.32692198	95.12704748	20.71491204	19.32692198	8.285964815	0	3.107236806	0	4.142982408	0	0	0	7	253.57	101.71	900.43	15.5361843109131	0
599	38	2010-12-08	4	3	0	39.6666679382324	20.3333339691162	0	60	3	2	207	73	0	1	1	1	1	11	908.0707363	599.2627876	1.035745602	4.831730494	0.087382224	0.087382224	1	1	8.285964815	19.32692198	95.12704748	20.71491204	19.32692198	8.285964815	0	3.107236806	0	4.142982408	0	0	0	7	253.57	101.71	900.43	15.5361843109131	0
600	40	2010-12-01	0	3	0	30.5	23	1	54.5	2	2	207	71	1	0	0	1	1	9	875.0284267	1084.406933	0.568658348	0	0.087382224	0	1	0	3.411950086	0	544.7688991	14.21645869	28.62678212	4.549266782	9.542260706	1.705975043	9.542260706	3.411950086	12.72301427	0	0	8	541.88	13.13	980.63	9.66719150543213	31.8075351715088
601	40	2010-12-01	1	3	0	39	19	2	60	3	2	207	71	1	0	0	1	1	9	875.0284267	1084.406933	0.568658348	0	0.087382224	0	1	0	3.411950086	0	544.7688991	14.21645869	28.62678212	4.549266782	9.542260706	1.705975043	9.542260706	3.411950086	12.72301427	0	0	8	541.88	13.13	980.63	9.66719150543213	31.8075351715088
602	40	2010-12-01	2	3	0	36.5	22.25	1.25	60	3	2	207	71	1	0	0	1	1	9	875.0284267	1084.406933	0.568658348	0	0.087382224	0	1	0	3.411950086	0	544.7688991	14.21645869	28.62678212	4.549266782	9.542260706	1.705975043	9.542260706	3.411950086	12.72301427	0	0	8	541.88	13.13	980.63	9.66719150543213	31.8075351715088
603	40	2010-12-01	3	3	0	42	17.6666660308838	0.333333343267441	60	3	2	207	71	1	0	0	1	1	9	875.0284267	1084.406933	0.568658348	0	0.087382224	0	1	0	3.411950086	0	544.7688991	14.21645869	28.62678212	4.549266782	9.542260706	1.705975043	9.542260706	3.411950086	12.72301427	0	0	8	541.88	13.13	980.63	9.66719150543213	31.8075351715088
604	40	2010-12-01	4	3	0	43.6666679382324	16	0.333333343267441	60	3	2	207	71	1	0	0	1	1	9	875.0284267	1084.406933	0.568658348	0	0.087382224	0	1	0	3.411950086	0	544.7688991	14.21645869	28.62678212	4.549266782	9.542260706	1.705975043	9.542260706	3.411950086	12.72301427	0	0	8	541.88	13.13	980.63	9.66719150543213	31.8075351715088
605	40	2010-12-02	2	4	0	34.5	25	0.5	60	2	2	207	71	1	0	0	1	1	9	875.0284267	1084.406933	0.568658348	0	0.087382224	0	1	0	3.411950086	0	544.7688991	14.21645869	28.62678212	4.549266782	9.542260706	1.705975043	9.542260706	3.411950086	12.72301427	0	0	8	541.88	13.13	980.63	9.66719150543213	31.8075351715088
606	40	2010-12-02	3	4	0	37.3333320617676	21.3333339691162	1.33333337306976	60	3	2	207	71	1	0	0	1	1	9	875.0284267	1084.406933	0.568658348	0	0.087382224	0	1	0	3.411950086	0	544.7688991	14.21645869	28.62678212	4.549266782	9.542260706	1.705975043	9.542260706	3.411950086	12.72301427	0	0	8	541.88	13.13	980.63	9.66719150543213	31.8075351715088
607	40	2010-12-02	4	4	0	33	26.3333339691162	0.666666686534882	60	3	2	207	71	1	0	0	1	1	9	875.0284267	1084.406933	0.568658348	0	0.087382224	0	1	0	3.411950086	0	544.7688991	14.21645869	28.62678212	4.549266782	9.542260706	1.705975043	9.542260706	3.411950086	12.72301427	0	0	8	541.88	13.13	980.63	9.66719150543213	31.8075351715088
608	40	2010-12-04	0	6	1	59	0	1	60	1	2	207	71	1	0	0	1	1	9	875.0284267	1084.406933	0.568658348	0	0.087382224	0	1	0	3.411950086	0	544.7688991	14.21645869	28.62678212	4.549266782	9.542260706	1.705975043	9.542260706	3.411950086	12.72301427	0	0	8	541.88	13.13	980.63	9.66719150543213	31.8075351715088
609	40	2010-12-04	1	6	1	38.6666679382324	21.3333339691162	0	60	3	2	207	71	1	0	0	1	1	9	875.0284267	1084.406933	0.568658348	0	0.087382224	0	1	0	3.411950086	0	544.7688991	14.21645869	28.62678212	4.549266782	9.542260706	1.705975043	9.542260706	3.411950086	12.72301427	0	0	8	541.88	13.13	980.63	9.66719150543213	31.8075351715088
610	40	2010-12-04	2	6	1	28.6666660308838	25.3333339691162	6	60	3	2	207	71	1	0	0	1	1	9	875.0284267	1084.406933	0.568658348	0	0.087382224	0	1	0	3.411950086	0	544.7688991	14.21645869	28.62678212	4.549266782	9.542260706	1.705975043	9.542260706	3.411950086	12.72301427	0	0	8	541.88	13.13	980.63	9.66719150543213	31.8075351715088
611	40	2010-12-04	3	6	1	24.3333339691162	20	15.6666669845581	60	3	2	207	71	1	0	0	1	1	9	875.0284267	1084.406933	0.568658348	0	0.087382224	0	1	0	3.411950086	0	544.7688991	14.21645869	28.62678212	4.549266782	9.542260706	1.705975043	9.542260706	3.411950086	12.72301427	0	0	8	541.88	13.13	980.63	9.66719150543213	31.8075351715088
612	40	2010-12-04	4	6	1	34	26	0	60	1	2	207	71	1	0	0	1	1	9	875.0284267	1084.406933	0.568658348	0	0.087382224	0	1	0	3.411950086	0	544.7688991	14.21645869	28.62678212	4.549266782	9.542260706	1.705975043	9.542260706	3.411950086	12.72301427	0	0	8	541.88	13.13	980.63	9.66719150543213	31.8075351715088
613	40	2010-12-05	0	0	1	2	10.5	0.5	13	2	2	207	71	1	0	0	1	1	9	875.0284267	1084.406933	0.568658348	0	0.087382224	0	1	0	3.411950086	0	544.7688991	14.21645869	28.62678212	4.549266782	9.542260706	1.705975043	9.542260706	3.411950086	12.72301427	0	0	8	541.88	13.13	980.63	9.66719150543213	31.8075351715088
614	40	2010-12-05	1	0	1	19.3333339691162	39.3333320617676	1.33333337306976	60	3	2	207	71	1	0	0	1	1	9	875.0284267	1084.406933	0.568658348	0	0.087382224	0	1	0	3.411950086	0	544.7688991	14.21645869	28.62678212	4.549266782	9.542260706	1.705975043	9.542260706	3.411950086	12.72301427	0	0	8	541.88	13.13	980.63	9.66719150543213	31.8075351715088
615	40	2010-12-05	2	0	1	47.3333320617676	12.3333330154419	0.333333343267441	60	3	2	207	71	1	0	0	1	1	9	875.0284267	1084.406933	0.568658348	0	0.087382224	0	1	0	3.411950086	0	544.7688991	14.21645869	28.62678212	4.549266782	9.542260706	1.705975043	9.542260706	3.411950086	12.72301427	0	0	8	541.88	13.13	980.63	9.66719150543213	31.8075351715088
616	40	2010-12-05	3	0	1	46	14	0	60	3	2	207	71	1	0	0	1	1	9	875.0284267	1084.406933	0.568658348	0	0.087382224	0	1	0	3.411950086	0	544.7688991	14.21645869	28.62678212	4.549266782	9.542260706	1.705975043	9.542260706	3.411950086	12.72301427	0	0	8	541.88	13.13	980.63	9.66719150543213	31.8075351715088
617	40	2010-12-05	4	0	1	40.5999984741211	18.2000007629395	1.20000004768372	60	3	2	207	71	1	0	0	1	1	9	875.0284267	1084.406933	0.568658348	0	0.087382224	0	1	0	3.411950086	0	544.7688991	14.21645869	28.62678212	4.549266782	9.542260706	1.705975043	9.542260706	3.411950086	12.72301427	0	0	8	541.88	13.13	980.63	9.66719150543213	31.8075351715088
618	40	2010-12-06	0	1	0	0	9	0	9	1	2	207	71	1	0	0	1	1	9	875.0284267	1084.406933	0.568658348	0	0.087382224	0	1	0	3.411950086	0	544.7688991	14.21645869	28.62678212	4.549266782	9.542260706	1.705975043	9.542260706	3.411950086	12.72301427	0	0	8	541.88	13.13	980.63	9.66719150543213	31.8075351715088
619	40	2010-12-06	1	1	0	37	22.6000003814697	0.400000005960464	60	3	2	207	71	1	0	0	1	1	9	875.0284267	1084.406933	0.568658348	0	0.087382224	0	1	0	3.411950086	0	544.7688991	14.21645869	28.62678212	4.549266782	9.542260706	1.705975043	9.542260706	3.411950086	12.72301427	0	0	8	541.88	13.13	980.63	9.66719150543213	31.8075351715088
620	40	2010-12-06	2	1	0	30	29.6666660308838	0.333333343267441	60	3	2	207	71	1	0	0	1	1	9	875.0284267	1084.406933	0.568658348	0	0.087382224	0	1	0	3.411950086	0	544.7688991	14.21645869	28.62678212	4.549266782	9.542260706	1.705975043	9.542260706	3.411950086	12.72301427	0	0	8	541.88	13.13	980.63	9.66719150543213	31.8075351715088
621	40	2010-12-06	3	1	0	40.3333320617676	18.6666660308838	1	60	3	2	207	71	1	0	0	1	1	9	875.0284267	1084.406933	0.568658348	0	0.087382224	0	1	0	3.411950086	0	544.7688991	14.21645869	28.62678212	4.549266782	9.542260706	1.705975043	9.542260706	3.411950086	12.72301427	0	0	8	541.88	13.13	980.63	9.66719150543213	31.8075351715088
622	40	2010-12-06	4	1	0	39.6666679382324	20.3333339691162	0	60	3	2	207	71	1	0	0	1	1	9	875.0284267	1084.406933	0.568658348	0	0.087382224	0	1	0	3.411950086	0	544.7688991	14.21645869	28.62678212	4.549266782	9.542260706	1.705975043	9.542260706	3.411950086	12.72301427	0	0	8	541.88	13.13	980.63	9.66719150543213	31.8075351715088
623	40	2010-12-07	1	2	0	21	27.75	1.5	50.25	3	2	207	71	1	0	0	1	1	9	875.0284267	1084.406933	0.568658348	0	0.087382224	0	1	0	3.411950086	0	544.7688991	14.21645869	28.62678212	4.549266782	9.542260706	1.705975043	9.542260706	3.411950086	12.72301427	0	0	8	541.88	13.13	980.63	9.66719150543213	31.8075351715088
624	40	2010-12-07	2	2	0	38.8333320617676	21	0.16666667163372	60	3	2	207	71	1	0	0	1	1	9	875.0284267	1084.406933	0.568658348	0	0.087382224	0	1	0	3.411950086	0	544.7688991	14.21645869	28.62678212	4.549266782	9.542260706	1.705975043	9.542260706	3.411950086	12.72301427	0	0	8	541.88	13.13	980.63	9.66719150543213	31.8075351715088
625	40	2010-12-07	3	2	0	23	36.6666679382324	0.333333343267441	60	3	2	207	71	1	0	0	1	1	9	875.0284267	1084.406933	0.568658348	0	0.087382224	0	1	0	3.411950086	0	544.7688991	14.21645869	28.62678212	4.549266782	9.542260706	1.705975043	9.542260706	3.411950086	12.72301427	0	0	8	541.88	13.13	980.63	9.66719150543213	31.8075351715088
626	40	2010-12-07	4	2	0	41	18.3333339691162	0.666666686534882	60	3	2	207	71	1	0	0	1	1	9	875.0284267	1084.406933	0.568658348	0	0.087382224	0	1	0	3.411950086	0	544.7688991	14.21645869	28.62678212	4.549266782	9.542260706	1.705975043	9.542260706	3.411950086	12.72301427	0	0	8	541.88	13.13	980.63	9.66719150543213	31.8075351715088
627	40	2010-12-08	1	3	0	20	27.75	4.25	52	3	2	207	71	1	0	0	1	1	9	875.0284267	1084.406933	0.568658348	0	0.087382224	0	1	0	3.411950086	0	544.7688991	14.21645869	28.62678212	4.549266782	9.542260706	1.705975043	9.542260706	3.411950086	12.72301427	0	0	8	541.88	13.13	980.63	9.66719150543213	31.8075351715088
628	40	2010-12-08	2	3	0	4.66666650772095	37.6666679382324	17.6666660308838	60	3	2	207	71	1	0	0	1	1	9	875.0284267	1084.406933	0.568658348	0	0.087382224	0	1	0	3.411950086	0	544.7688991	14.21645869	28.62678212	4.549266782	9.542260706	1.705975043	9.542260706	3.411950086	12.72301427	0	0	8	541.88	13.13	980.63	9.66719150543213	31.8075351715088
629	40	2010-12-08	3	3	0	37.8333320617676	21.6666660308838	0.5	60	3	2	207	71	1	0	0	1	1	9	875.0284267	1084.406933	0.568658348	0	0.087382224	0	1	0	3.411950086	0	544.7688991	14.21645869	28.62678212	4.549266782	9.542260706	1.705975043	9.542260706	3.411950086	12.72301427	0	0	8	541.88	13.13	980.63	9.66719150543213	31.8075351715088
630	40	2010-12-08	4	3	0	29.8333339691162	29	1.16666662693024	60	3	2	207	71	1	0	0	1	1	9	875.0284267	1084.406933	0.568658348	0	0.087382224	0	1	0	3.411950086	0	544.7688991	14.21645869	28.62678212	4.549266782	9.542260706	1.705975043	9.542260706	3.411950086	12.72301427	0	0	8	541.88	13.13	980.63	9.66719150543213	31.8075351715088
631	43	2010-12-02	0	4	0	59	0	1	60	1	2	207	73	1	1	0	1	1	9	892.7902768	1152.711043	0.735740717	5.098517308	0.087382224	0.087382224	1	1	5.885925733	10.19703462	311.2187622	15.45055505	35.68962116	6.621666449	15.29555192	2.20722215	10.19703462	3.678703583	10.19703462	0	0	8	491.13	14.63	917.75	12.5075922012329	35.6896209716797
632	43	2010-12-02	1	4	0	38.6666679382324	21.3333339691162	0	60	3	2	207	73	1	1	0	1	1	9	892.7902768	1152.711043	0.735740717	5.098517308	0.087382224	0.087382224	1	1	5.885925733	10.19703462	311.2187622	15.45055505	35.68962116	6.621666449	15.29555192	2.20722215	10.19703462	3.678703583	10.19703462	0	0	8	491.13	14.63	917.75	12.5075922012329	35.6896209716797
633	43	2010-12-02	2	4	0	28.6666660308838	25.3333339691162	6	60	3	2	207	73	1	1	0	1	1	9	892.7902768	1152.711043	0.735740717	5.098517308	0.087382224	0.087382224	1	1	5.885925733	10.19703462	311.2187622	15.45055505	35.68962116	6.621666449	15.29555192	2.20722215	10.19703462	3.678703583	10.19703462	0	0	8	491.13	14.63	917.75	12.5075922012329	35.6896209716797
634	43	2010-12-02	3	4	0	1	13	46	60	1	2	207	73	1	1	0	1	1	9	892.7902768	1152.711043	0.735740717	5.098517308	0.087382224	0.087382224	1	1	5.885925733	10.19703462	311.2187622	15.45055505	35.68962116	6.621666449	15.29555192	2.20722215	10.19703462	3.678703583	10.19703462	0	0	8	491.13	14.63	917.75	12.5075922012329	35.6896209716797
635	43	2010-12-03	0	5	0	0	11	1	12	1	2	207	73	1	1	0	1	1	9	892.7902768	1152.711043	0.735740717	5.098517308	0.087382224	0.087382224	1	1	5.885925733	10.19703462	311.2187622	15.45055505	35.68962116	6.621666449	15.29555192	2.20722215	10.19703462	3.678703583	10.19703462	0	0	8	491.13	14.63	917.75	12.5075922012329	35.6896209716797
636	43	2010-12-03	1	5	0	19.3333339691162	39.3333320617676	1.33333337306976	60	3	2	207	73	1	1	0	1	1	9	892.7902768	1152.711043	0.735740717	5.098517308	0.087382224	0.087382224	1	1	5.885925733	10.19703462	311.2187622	15.45055505	35.68962116	6.621666449	15.29555192	2.20722215	10.19703462	3.678703583	10.19703462	0	0	8	491.13	14.63	917.75	12.5075922012329	35.6896209716797
637	43	2010-12-03	2	5	0	47.3333320617676	12.3333330154419	0.333333343267441	60	3	2	207	73	1	1	0	1	1	9	892.7902768	1152.711043	0.735740717	5.098517308	0.087382224	0.087382224	1	1	5.885925733	10.19703462	311.2187622	15.45055505	35.68962116	6.621666449	15.29555192	2.20722215	10.19703462	3.678703583	10.19703462	0	0	8	491.13	14.63	917.75	12.5075922012329	35.6896209716797
638	43	2010-12-03	3	5	0	42	17.7999992370605	0.200000002980232	60	3	2	207	73	1	1	0	1	1	9	892.7902768	1152.711043	0.735740717	5.098517308	0.087382224	0.087382224	1	1	5.885925733	10.19703462	311.2187622	15.45055505	35.68962116	6.621666449	15.29555192	2.20722215	10.19703462	3.678703583	10.19703462	0	0	8	491.13	14.63	917.75	12.5075922012329	35.6896209716797
639	43	2010-12-03	4	5	0	36	22.5	1.5	60	3	2	207	73	1	1	0	1	1	9	892.7902768	1152.711043	0.735740717	5.098517308	0.087382224	0.087382224	1	1	5.885925733	10.19703462	311.2187622	15.45055505	35.68962116	6.621666449	15.29555192	2.20722215	10.19703462	3.678703583	10.19703462	0	0	8	491.13	14.63	917.75	12.5075922012329	35.6896209716797
640	43	2010-12-04	0	6	1	2	9.5	0	11.5	2	2	207	73	1	1	0	1	1	9	892.7902768	1152.711043	0.735740717	5.098517308	0.087382224	0.087382224	1	1	5.885925733	10.19703462	311.2187622	15.45055505	35.68962116	6.621666449	15.29555192	2.20722215	10.19703462	3.678703583	10.19703462	0	0	8	491.13	14.63	917.75	12.5075922012329	35.6896209716797
641	43	2010-12-04	1	6	1	39	20.5	0.5	60	3	2	207	73	1	1	0	1	1	9	892.7902768	1152.711043	0.735740717	5.098517308	0.087382224	0.087382224	1	1	5.885925733	10.19703462	311.2187622	15.45055505	35.68962116	6.621666449	15.29555192	2.20722215	10.19703462	3.678703583	10.19703462	0	0	8	491.13	14.63	917.75	12.5075922012329	35.6896209716797
642	43	2010-12-04	2	6	1	30	29.6666660308838	0.333333343267441	60	3	2	207	73	1	1	0	1	1	9	892.7902768	1152.711043	0.735740717	5.098517308	0.087382224	0.087382224	1	1	5.885925733	10.19703462	311.2187622	15.45055505	35.68962116	6.621666449	15.29555192	2.20722215	10.19703462	3.678703583	10.19703462	0	0	8	491.13	14.63	917.75	12.5075922012329	35.6896209716797
643	43	2010-12-04	3	6	1	40.3333320617676	18.6666660308838	1	60	3	2	207	73	1	1	0	1	1	9	892.7902768	1152.711043	0.735740717	5.098517308	0.087382224	0.087382224	1	1	5.885925733	10.19703462	311.2187622	15.45055505	35.68962116	6.621666449	15.29555192	2.20722215	10.19703462	3.678703583	10.19703462	0	0	8	491.13	14.63	917.75	12.5075922012329	35.6896209716797
644	43	2010-12-04	4	6	1	42.4000015258789	17.6000003814697	0	60	3	2	207	73	1	1	0	1	1	9	892.7902768	1152.711043	0.735740717	5.098517308	0.087382224	0.087382224	1	1	5.885925733	10.19703462	311.2187622	15.45055505	35.68962116	6.621666449	15.29555192	2.20722215	10.19703462	3.678703583	10.19703462	0	0	8	491.13	14.63	917.75	12.5075922012329	35.6896209716797
645	43	2010-12-05	1	0	1	22.6000003814697	28.3999996185303	1.20000004768372	52.2000007629395	3	2	207	73	1	1	0	1	1	9	892.7902768	1152.711043	0.735740717	5.098517308	0.087382224	0.087382224	1	1	5.885925733	10.19703462	311.2187622	15.45055505	35.68962116	6.621666449	15.29555192	2.20722215	10.19703462	3.678703583	10.19703462	0	0	8	491.13	14.63	917.75	12.5075922012329	35.6896209716797
646	43	2010-12-05	2	0	1	38	22	0	60	3	2	207	73	1	1	0	1	1	9	892.7902768	1152.711043	0.735740717	5.098517308	0.087382224	0.087382224	1	1	5.885925733	10.19703462	311.2187622	15.45055505	35.68962116	6.621666449	15.29555192	2.20722215	10.19703462	3.678703583	10.19703462	0	0	8	491.13	14.63	917.75	12.5075922012329	35.6896209716797
647	43	2010-12-05	3	0	1	23	36.6666679382324	0.333333343267441	60	3	2	207	73	1	1	0	1	1	9	892.7902768	1152.711043	0.735740717	5.098517308	0.087382224	0.087382224	1	1	5.885925733	10.19703462	311.2187622	15.45055505	35.68962116	6.621666449	15.29555192	2.20722215	10.19703462	3.678703583	10.19703462	0	0	8	491.13	14.63	917.75	12.5075922012329	35.6896209716797
648	43	2010-12-05	4	0	1	41	18.3333339691162	0.666666686534882	60	3	2	207	73	1	1	0	1	1	9	892.7902768	1152.711043	0.735740717	5.098517308	0.087382224	0.087382224	1	1	5.885925733	10.19703462	311.2187622	15.45055505	35.68962116	6.621666449	15.29555192	2.20722215	10.19703462	3.678703583	10.19703462	0	0	8	491.13	14.63	917.75	12.5075922012329	35.6896209716797
649	43	2010-12-06	1	1	0	6	31.5	8	45.5	2	2	207	73	1	1	0	1	1	9	892.7902768	1152.711043	0.735740717	5.098517308	0.087382224	0.087382224	1	1	5.885925733	10.19703462	311.2187622	15.45055505	35.68962116	6.621666449	15.29555192	2.20722215	10.19703462	3.678703583	10.19703462	0	0	8	491.13	14.63	917.75	12.5075922012329	35.6896209716797
650	43	2010-12-06	2	1	0	14.25	32.25	13.5	60	3	2	207	73	1	1	0	1	1	9	892.7902768	1152.711043	0.735740717	5.098517308	0.087382224	0.087382224	1	1	5.885925733	10.19703462	311.2187622	15.45055505	35.68962116	6.621666449	15.29555192	2.20722215	10.19703462	3.678703583	10.19703462	0	0	8	491.13	14.63	917.75	12.5075922012329	35.6896209716797
651	43	2010-12-06	3	1	0	37.8333320617676	21.6666660308838	0.5	60	3	2	207	73	1	1	0	1	1	9	892.7902768	1152.711043	0.735740717	5.098517308	0.087382224	0.087382224	1	1	5.885925733	10.19703462	311.2187622	15.45055505	35.68962116	6.621666449	15.29555192	2.20722215	10.19703462	3.678703583	10.19703462	0	0	8	491.13	14.63	917.75	12.5075922012329	35.6896209716797
652	43	2010-12-06	4	1	0	34.3333320617676	25.3333339691162	0.333333343267441	60	3	2	207	73	1	1	0	1	1	9	892.7902768	1152.711043	0.735740717	5.098517308	0.087382224	0.087382224	1	1	5.885925733	10.19703462	311.2187622	15.45055505	35.68962116	6.621666449	15.29555192	2.20722215	10.19703462	3.678703583	10.19703462	0	0	8	491.13	14.63	917.75	12.5075922012329	35.6896209716797
653	43	2010-12-07	0	2	0	24	23	2	49	1	2	207	73	1	1	0	1	1	9	892.7902768	1152.711043	0.735740717	5.098517308	0.087382224	0.087382224	1	1	5.885925733	10.19703462	311.2187622	15.45055505	35.68962116	6.621666449	15.29555192	2.20722215	10.19703462	3.678703583	10.19703462	0	0	8	491.13	14.63	917.75	12.5075922012329	35.6896209716797
654	43	2010-12-07	1	2	0	37.3333320617676	21.3333339691162	0.333333343267441	59	3	2	207	73	1	1	0	1	1	9	892.7902768	1152.711043	0.735740717	5.098517308	0.087382224	0.087382224	1	1	5.885925733	10.19703462	311.2187622	15.45055505	35.68962116	6.621666449	15.29555192	2.20722215	10.19703462	3.678703583	10.19703462	0	0	8	491.13	14.63	917.75	12.5075922012329	35.6896209716797
655	43	2010-12-07	2	2	0	40.3333320617676	18.3333339691162	1.33333337306976	60	3	2	207	73	1	1	0	1	1	9	892.7902768	1152.711043	0.735740717	5.098517308	0.087382224	0.087382224	1	1	5.885925733	10.19703462	311.2187622	15.45055505	35.68962116	6.621666449	15.29555192	2.20722215	10.19703462	3.678703583	10.19703462	0	0	8	491.13	14.63	917.75	12.5075922012329	35.6896209716797
656	43	2010-12-07	3	2	0	42	17.6666660308838	0.333333343267441	60	3	2	207	73	1	1	0	1	1	9	892.7902768	1152.711043	0.735740717	5.098517308	0.087382224	0.087382224	1	1	5.885925733	10.19703462	311.2187622	15.45055505	35.68962116	6.621666449	15.29555192	2.20722215	10.19703462	3.678703583	10.19703462	0	0	8	491.13	14.63	917.75	12.5075922012329	35.6896209716797
657	43	2010-12-07	4	2	0	34.5	24.3333339691162	1.16666662693024	60	3	2	207	73	1	1	0	1	1	9	892.7902768	1152.711043	0.735740717	5.098517308	0.087382224	0.087382224	1	1	5.885925733	10.19703462	311.2187622	15.45055505	35.68962116	6.621666449	15.29555192	2.20722215	10.19703462	3.678703583	10.19703462	0	0	8	491.13	14.63	917.75	12.5075922012329	35.6896209716797
658	43	2010-12-08	0	3	0	37	23	0	60	1	2	207	73	1	1	0	1	1	9	892.7902768	1152.711043	0.735740717	5.098517308	0.087382224	0.087382224	1	1	5.885925733	10.19703462	311.2187622	15.45055505	35.68962116	6.621666449	15.29555192	2.20722215	10.19703462	3.678703583	10.19703462	0	0	8	491.13	14.63	917.75	12.5075922012329	35.6896209716797
659	43	2010-12-08	1	3	0	37.3333320617676	20	2.66666674613953	60	3	2	207	73	1	1	0	1	1	9	892.7902768	1152.711043	0.735740717	5.098517308	0.087382224	0.087382224	1	1	5.885925733	10.19703462	311.2187622	15.45055505	35.68962116	6.621666449	15.29555192	2.20722215	10.19703462	3.678703583	10.19703462	0	0	8	491.13	14.63	917.75	12.5075922012329	35.6896209716797
660	43	2010-12-08	2	3	0	31.3333339691162	28	0.666666686534882	60	3	2	207	73	1	1	0	1	1	9	892.7902768	1152.711043	0.735740717	5.098517308	0.087382224	0.087382224	1	1	5.885925733	10.19703462	311.2187622	15.45055505	35.68962116	6.621666449	15.29555192	2.20722215	10.19703462	3.678703583	10.19703462	0	0	8	491.13	14.63	917.75	12.5075922012329	35.6896209716797
661	43	2010-12-08	3	3	0	37.3333320617676	21.3333339691162	1.33333337306976	60	3	2	207	73	1	1	0	1	1	9	892.7902768	1152.711043	0.735740717	5.098517308	0.087382224	0.087382224	1	1	5.885925733	10.19703462	311.2187622	15.45055505	35.68962116	6.621666449	15.29555192	2.20722215	10.19703462	3.678703583	10.19703462	0	0	8	491.13	14.63	917.75	12.5075922012329	35.6896209716797
662	43	2010-12-08	4	3	0	33	26.3333339691162	0.666666686534882	60	3	2	207	73	1	1	0	1	1	9	892.7902768	1152.711043	0.735740717	5.098517308	0.087382224	0.087382224	1	1	5.885925733	10.19703462	311.2187622	15.45055505	35.68962116	6.621666449	15.29555192	2.20722215	10.19703462	3.678703583	10.19703462	0	0	8	491.13	14.63	917.75	12.5075922012329	35.6896209716797
663	45	2010-12-01	0	3	0	0	11	1	12	1	2	207	68	0	1	0	1	1	10	891.2532305	915.9845891	0.861056559	4.430494159	0.087382224	0.087382224	1	1	6.888452469	8.860988317	196.7984776	16.36007461	17.72197663	7.749509027	8.860988317	2.583169676	8.860988317	4.305282793	4.430494159	0.861056559	0	7	311.43	123	866.86	15.4990177154541	22.1524715423584
664	45	2010-12-01	1	3	0	19.3333339691162	39.3333320617676	1.33333337306976	60	3	2	207	68	0	1	0	1	1	10	891.2532305	915.9845891	0.861056559	4.430494159	0.087382224	0.087382224	1	1	6.888452469	8.860988317	196.7984776	16.36007461	17.72197663	7.749509027	8.860988317	2.583169676	8.860988317	4.305282793	4.430494159	0.861056559	0	7	311.43	123	866.86	15.4990177154541	22.1524715423584
665	45	2010-12-01	2	3	0	44.5	12.25	3.25	60	3	2	207	68	0	1	0	1	1	10	891.2532305	915.9845891	0.861056559	4.430494159	0.087382224	0.087382224	1	1	6.888452469	8.860988317	196.7984776	16.36007461	17.72197663	7.749509027	8.860988317	2.583169676	8.860988317	4.305282793	4.430494159	0.861056559	0	7	311.43	123	866.86	15.4990177154541	22.1524715423584
666	45	2010-12-01	3	3	0	32.5999984741211	18	9.39999961853027	60	3	2	207	68	0	1	0	1	1	10	891.2532305	915.9845891	0.861056559	4.430494159	0.087382224	0.087382224	1	1	6.888452469	8.860988317	196.7984776	16.36007461	17.72197663	7.749509027	8.860988317	2.583169676	8.860988317	4.305282793	4.430494159	0.861056559	0	7	311.43	123	866.86	15.4990177154541	22.1524715423584
667	45	2010-12-01	4	3	0	34	24	2	60	3	2	207	68	0	1	0	1	1	10	891.2532305	915.9845891	0.861056559	4.430494159	0.087382224	0.087382224	1	1	6.888452469	8.860988317	196.7984776	16.36007461	17.72197663	7.749509027	8.860988317	2.583169676	8.860988317	4.305282793	4.430494159	0.861056559	0	7	311.43	123	866.86	15.4990177154541	22.1524715423584
668	45	2010-12-02	0	4	0	4	10	0	14	1	2	207	68	0	1	0	1	1	10	891.2532305	915.9845891	0.861056559	4.430494159	0.087382224	0.087382224	1	1	6.888452469	8.860988317	196.7984776	16.36007461	17.72197663	7.749509027	8.860988317	2.583169676	8.860988317	4.305282793	4.430494159	0.861056559	0	7	311.43	123	866.86	15.4990177154541	22.1524715423584
669	45	2010-12-02	1	4	0	41.6666679382324	18	0.333333343267441	60	3	2	207	68	0	1	0	1	1	10	891.2532305	915.9845891	0.861056559	4.430494159	0.087382224	0.087382224	1	1	6.888452469	8.860988317	196.7984776	16.36007461	17.72197663	7.749509027	8.860988317	2.583169676	8.860988317	4.305282793	4.430494159	0.861056559	0	7	311.43	123	866.86	15.4990177154541	22.1524715423584
670	45	2010-12-02	2	4	0	30	29.6666660308838	0.333333343267441	60	3	2	207	68	0	1	0	1	1	10	891.2532305	915.9845891	0.861056559	4.430494159	0.087382224	0.087382224	1	1	6.888452469	8.860988317	196.7984776	16.36007461	17.72197663	7.749509027	8.860988317	2.583169676	8.860988317	4.305282793	4.430494159	0.861056559	0	7	311.43	123	866.86	15.4990177154541	22.1524715423584
671	45	2010-12-02	3	4	0	42.25	17	0.75	60	3	2	207	68	0	1	0	1	1	10	891.2532305	915.9845891	0.861056559	4.430494159	0.087382224	0.087382224	1	1	6.888452469	8.860988317	196.7984776	16.36007461	17.72197663	7.749509027	8.860988317	2.583169676	8.860988317	4.305282793	4.430494159	0.861056559	0	7	311.43	123	866.86	15.4990177154541	22.1524715423584
672	45	2010-12-02	4	4	0	40.7999992370605	19.2000007629395	0	60	3	2	207	68	0	1	0	1	1	10	891.2532305	915.9845891	0.861056559	4.430494159	0.087382224	0.087382224	1	1	6.888452469	8.860988317	196.7984776	16.36007461	17.72197663	7.749509027	8.860988317	2.583169676	8.860988317	4.305282793	4.430494159	0.861056559	0	7	311.43	123	866.86	15.4990177154541	22.1524715423584
673	45	2010-12-03	0	5	0	0	9	0	9	1	2	207	68	0	1	0	1	1	10	891.2532305	915.9845891	0.861056559	4.430494159	0.087382224	0.087382224	1	1	6.888452469	8.860988317	196.7984776	16.36007461	17.72197663	7.749509027	8.860988317	2.583169676	8.860988317	4.305282793	4.430494159	0.861056559	0	7	311.43	123	866.86	15.4990177154541	22.1524715423584
674	45	2010-12-03	1	5	0	22.2000007629395	28.7999992370605	1.20000004768372	52.2000007629395	3	2	207	68	0	1	0	1	1	10	891.2532305	915.9845891	0.861056559	4.430494159	0.087382224	0.087382224	1	1	6.888452469	8.860988317	196.7984776	16.36007461	17.72197663	7.749509027	8.860988317	2.583169676	8.860988317	4.305282793	4.430494159	0.861056559	0	7	311.43	123	866.86	15.4990177154541	22.1524715423584
675	45	2010-12-03	2	5	0	33	27	0	60	3	2	207	68	0	1	0	1	1	10	891.2532305	915.9845891	0.861056559	4.430494159	0.087382224	0.087382224	1	1	6.888452469	8.860988317	196.7984776	16.36007461	17.72197663	7.749509027	8.860988317	2.583169676	8.860988317	4.305282793	4.430494159	0.861056559	0	7	311.43	123	866.86	15.4990177154541	22.1524715423584
676	45	2010-12-03	3	5	0	23	36.6666679382324	0.333333343267441	60	3	2	207	68	0	1	0	1	1	10	891.2532305	915.9845891	0.861056559	4.430494159	0.087382224	0.087382224	1	1	6.888452469	8.860988317	196.7984776	16.36007461	17.72197663	7.749509027	8.860988317	2.583169676	8.860988317	4.305282793	4.430494159	0.861056559	0	7	311.43	123	866.86	15.4990177154541	22.1524715423584
677	45	2010-12-03	4	5	0	43.25	16.25	0.5	60	3	2	207	68	0	1	0	1	1	10	891.2532305	915.9845891	0.861056559	4.430494159	0.087382224	0.087382224	1	1	6.888452469	8.860988317	196.7984776	16.36007461	17.72197663	7.749509027	8.860988317	2.583169676	8.860988317	4.305282793	4.430494159	0.861056559	0	7	311.43	123	866.86	15.4990177154541	22.1524715423584
678	45	2010-12-04	1	6	1	15	29.6666660308838	5.66666650772095	50.3333320617676	3	2	207	68	0	1	0	1	1	10	891.2532305	915.9845891	0.861056559	4.430494159	0.087382224	0.087382224	1	1	6.888452469	8.860988317	196.7984776	16.36007461	17.72197663	7.749509027	8.860988317	2.583169676	8.860988317	4.305282793	4.430494159	0.861056559	0	7	311.43	123	866.86	15.4990177154541	22.1524715423584
679	45	2010-12-04	2	6	1	24.6666660308838	26.3333339691162	9	60	3	2	207	68	0	1	0	1	1	10	891.2532305	915.9845891	0.861056559	4.430494159	0.087382224	0.087382224	1	1	6.888452469	8.860988317	196.7984776	16.36007461	17.72197663	7.749509027	8.860988317	2.583169676	8.860988317	4.305282793	4.430494159	0.861056559	0	7	311.43	123	866.86	15.4990177154541	22.1524715423584
680	45	2010-12-04	3	6	1	39.5999984741211	19.7999992370605	0.600000023841858	60	3	2	207	68	0	1	0	1	1	10	891.2532305	915.9845891	0.861056559	4.430494159	0.087382224	0.087382224	1	1	6.888452469	8.860988317	196.7984776	16.36007461	17.72197663	7.749509027	8.860988317	2.583169676	8.860988317	4.305282793	4.430494159	0.861056559	0	7	311.43	123	866.86	15.4990177154541	22.1524715423584
681	45	2010-12-04	4	6	1	34.3333320617676	25.3333339691162	0.333333343267441	60	3	2	207	68	0	1	0	1	1	10	891.2532305	915.9845891	0.861056559	4.430494159	0.087382224	0.087382224	1	1	6.888452469	8.860988317	196.7984776	16.36007461	17.72197663	7.749509027	8.860988317	2.583169676	8.860988317	4.305282793	4.430494159	0.861056559	0	7	311.43	123	866.86	15.4990177154541	22.1524715423584
682	45	2010-12-05	1	0	1	37.3333320617676	21.3333339691162	0.333333343267441	59	3	2	207	68	0	1	0	1	1	10	891.2532305	915.9845891	0.861056559	4.430494159	0.087382224	0.087382224	1	1	6.888452469	8.860988317	196.7984776	16.36007461	17.72197663	7.749509027	8.860988317	2.583169676	8.860988317	4.305282793	4.430494159	0.861056559	0	7	311.43	123	866.86	15.4990177154541	22.1524715423584
683	45	2010-12-05	2	0	1	40.3333320617676	18.3333339691162	1.33333337306976	60	3	2	207	68	0	1	0	1	1	10	891.2532305	915.9845891	0.861056559	4.430494159	0.087382224	0.087382224	1	1	6.888452469	8.860988317	196.7984776	16.36007461	17.72197663	7.749509027	8.860988317	2.583169676	8.860988317	4.305282793	4.430494159	0.861056559	0	7	311.43	123	866.86	15.4990177154541	22.1524715423584
684	45	2010-12-05	3	0	1	38.75	21	0.25	60	3	2	207	68	0	1	0	1	1	10	891.2532305	915.9845891	0.861056559	4.430494159	0.087382224	0.087382224	1	1	6.888452469	8.860988317	196.7984776	16.36007461	17.72197663	7.749509027	8.860988317	2.583169676	8.860988317	4.305282793	4.430494159	0.861056559	0	7	311.43	123	866.86	15.4990177154541	22.1524715423584
685	45	2010-12-05	4	0	1	34.5	24.3333339691162	1.16666662693024	60	3	2	207	68	0	1	0	1	1	10	891.2532305	915.9845891	0.861056559	4.430494159	0.087382224	0.087382224	1	1	6.888452469	8.860988317	196.7984776	16.36007461	17.72197663	7.749509027	8.860988317	2.583169676	8.860988317	4.305282793	4.430494159	0.861056559	0	7	311.43	123	866.86	15.4990177154541	22.1524715423584
686	45	2010-12-06	0	1	0	30.5	23	1	54.5	2	2	207	68	0	1	0	1	1	10	891.2532305	915.9845891	0.861056559	4.430494159	0.087382224	0.087382224	1	1	6.888452469	8.860988317	196.7984776	16.36007461	17.72197663	7.749509027	8.860988317	2.583169676	8.860988317	4.305282793	4.430494159	0.861056559	0	7	311.43	123	866.86	15.4990177154541	22.1524715423584
687	45	2010-12-06	1	1	0	37.3333320617676	20	2.66666674613953	60	3	2	207	68	0	1	0	1	1	10	891.2532305	915.9845891	0.861056559	4.430494159	0.087382224	0.087382224	1	1	6.888452469	8.860988317	196.7984776	16.36007461	17.72197663	7.749509027	8.860988317	2.583169676	8.860988317	4.305282793	4.430494159	0.861056559	0	7	311.43	123	866.86	15.4990177154541	22.1524715423584
688	45	2010-12-06	2	1	0	31.3333339691162	28	0.666666686534882	60	3	2	207	68	0	1	0	1	1	10	891.2532305	915.9845891	0.861056559	4.430494159	0.087382224	0.087382224	1	1	6.888452469	8.860988317	196.7984776	16.36007461	17.72197663	7.749509027	8.860988317	2.583169676	8.860988317	4.305282793	4.430494159	0.861056559	0	7	311.43	123	866.86	15.4990177154541	22.1524715423584
689	45	2010-12-06	3	1	0	37.3333320617676	21.3333339691162	1.33333337306976	60	3	2	207	68	0	1	0	1	1	10	891.2532305	915.9845891	0.861056559	4.430494159	0.087382224	0.087382224	1	1	6.888452469	8.860988317	196.7984776	16.36007461	17.72197663	7.749509027	8.860988317	2.583169676	8.860988317	4.305282793	4.430494159	0.861056559	0	7	311.43	123	866.86	15.4990177154541	22.1524715423584
690	45	2010-12-06	4	1	0	33	26.3333339691162	0.666666686534882	60	3	2	207	68	0	1	0	1	1	10	891.2532305	915.9845891	0.861056559	4.430494159	0.087382224	0.087382224	1	1	6.888452469	8.860988317	196.7984776	16.36007461	17.72197663	7.749509027	8.860988317	2.583169676	8.860988317	4.305282793	4.430494159	0.861056559	0	7	311.43	123	866.86	15.4990177154541	22.1524715423584
691	45	2010-12-08	0	3	0	59	0	1	60	1	2	207	68	0	1	0	1	1	10	891.2532305	915.9845891	0.861056559	4.430494159	0.087382224	0.087382224	1	1	6.888452469	8.860988317	196.7984776	16.36007461	17.72197663	7.749509027	8.860988317	2.583169676	8.860988317	4.305282793	4.430494159	0.861056559	0	7	311.43	123	866.86	15.4990177154541	22.1524715423584
692	45	2010-12-08	1	3	0	38.6666679382324	21.3333339691162	0	60	3	2	207	68	0	1	0	1	1	10	891.2532305	915.9845891	0.861056559	4.430494159	0.087382224	0.087382224	1	1	6.888452469	8.860988317	196.7984776	16.36007461	17.72197663	7.749509027	8.860988317	2.583169676	8.860988317	4.305282793	4.430494159	0.861056559	0	7	311.43	123	866.86	15.4990177154541	22.1524715423584
693	45	2010-12-08	2	3	0	25	32	3	60	2	2	207	68	0	1	0	1	1	10	891.2532305	915.9845891	0.861056559	4.430494159	0.087382224	0.087382224	1	1	6.888452469	8.860988317	196.7984776	16.36007461	17.72197663	7.749509027	8.860988317	2.583169676	8.860988317	4.305282793	4.430494159	0.861056559	0	7	311.43	123	866.86	15.4990177154541	22.1524715423584
694	59	2010-12-01	0	3	0	6	30	4	40	1	2	207	87	1	1	1	0	1	11	900.7001648	1467.00565	0.972657636	0	0.087382224	0	1	0	5.835945816	0	468.113051	17.50783745	52.11747468	8.753918724	26.05873734	2.917972908	0	4.86328818	6.514684335	0.972657636	0	7	398.57	9	912.86	17.5078372955322	32.5734214782715
695	59	2010-12-01	1	3	0	6.33333349227905	53	0.666666686534882	60	3	2	207	87	1	1	1	0	1	11	900.7001648	1467.00565	0.972657636	0	0.087382224	0	1	0	5.835945816	0	468.113051	17.50783745	52.11747468	8.753918724	26.05873734	2.917972908	0	4.86328818	6.514684335	0.972657636	0	7	398.57	9	912.86	17.5078372955322	32.5734214782715
696	59	2010-12-01	2	3	0	51.3333320617676	8.33333301544189	0.333333343267441	60	3	2	207	87	1	1	1	0	1	11	900.7001648	1467.00565	0.972657636	0	0.087382224	0	1	0	5.835945816	0	468.113051	17.50783745	52.11747468	8.753918724	26.05873734	2.917972908	0	4.86328818	6.514684335	0.972657636	0	7	398.57	9	912.86	17.5078372955322	32.5734214782715
697	59	2010-12-01	3	3	0	26.3333339691162	32.3333320617676	1.33333337306976	60	3	2	207	87	1	1	1	0	1	11	900.7001648	1467.00565	0.972657636	0	0.087382224	0	1	0	5.835945816	0	468.113051	17.50783745	52.11747468	8.753918724	26.05873734	2.917972908	0	4.86328818	6.514684335	0.972657636	0	7	398.57	9	912.86	17.5078372955322	32.5734214782715
698	59	2010-12-01	4	3	0	25.8333339691162	34.1666679382324	0	60	3	2	207	87	1	1	1	0	1	11	900.7001648	1467.00565	0.972657636	0	0.087382224	0	1	0	5.835945816	0	468.113051	17.50783745	52.11747468	8.753918724	26.05873734	2.917972908	0	4.86328818	6.514684335	0.972657636	0	7	398.57	9	912.86	17.5078372955322	32.5734214782715
699	59	2010-12-02	0	4	0	3	20	0	23	3	2	207	87	1	1	1	0	1	11	900.7001648	1467.00565	0.972657636	0	0.087382224	0	1	0	5.835945816	0	468.113051	17.50783745	52.11747468	8.753918724	26.05873734	2.917972908	0	4.86328818	6.514684335	0.972657636	0	7	398.57	9	912.86	17.5078372955322	32.5734214782715
700	59	2010-12-02	1	4	0	22	37.25	0.75	60	3	2	207	87	1	1	1	0	1	11	900.7001648	1467.00565	0.972657636	0	0.087382224	0	1	0	5.835945816	0	468.113051	17.50783745	52.11747468	8.753918724	26.05873734	2.917972908	0	4.86328818	6.514684335	0.972657636	0	7	398.57	9	912.86	17.5078372955322	32.5734214782715
701	59	2010-12-02	2	4	0	10.3333330154419	49	0.666666686534882	60	3	2	207	87	1	1	1	0	1	11	900.7001648	1467.00565	0.972657636	0	0.087382224	0	1	0	5.835945816	0	468.113051	17.50783745	52.11747468	8.753918724	26.05873734	2.917972908	0	4.86328818	6.514684335	0.972657636	0	7	398.57	9	912.86	17.5078372955322	32.5734214782715
702	59	2010-12-02	3	4	0	31.3333339691162	27	1.66666662693024	60	3	2	207	87	1	1	1	0	1	11	900.7001648	1467.00565	0.972657636	0	0.087382224	0	1	0	5.835945816	0	468.113051	17.50783745	52.11747468	8.753918724	26.05873734	2.917972908	0	4.86328818	6.514684335	0.972657636	0	7	398.57	9	912.86	17.5078372955322	32.5734214782715
703	59	2010-12-02	4	4	0	25.6666660308838	33.3333320617676	1	60	3	2	207	87	1	1	1	0	1	11	900.7001648	1467.00565	0.972657636	0	0.087382224	0	1	0	5.835945816	0	468.113051	17.50783745	52.11747468	8.753918724	26.05873734	2.917972908	0	4.86328818	6.514684335	0.972657636	0	7	398.57	9	912.86	17.5078372955322	32.5734214782715
704	59	2010-12-03	0	5	0	13.3333330154419	35.6666679382324	0	49	3	2	207	87	1	1	1	0	1	11	900.7001648	1467.00565	0.972657636	0	0.087382224	0	1	0	5.835945816	0	468.113051	17.50783745	52.11747468	8.753918724	26.05873734	2.917972908	0	4.86328818	6.514684335	0.972657636	0	7	398.57	9	912.86	17.5078372955322	32.5734214782715
705	59	2010-12-03	1	5	0	16.25	43	0.75	60	3	2	207	87	1	1	1	0	1	11	900.7001648	1467.00565	0.972657636	0	0.087382224	0	1	0	5.835945816	0	468.113051	17.50783745	52.11747468	8.753918724	26.05873734	2.917972908	0	4.86328818	6.514684335	0.972657636	0	7	398.57	9	912.86	17.5078372955322	32.5734214782715
706	59	2010-12-03	2	5	0	40	20	0	60	3	2	207	87	1	1	1	0	1	11	900.7001648	1467.00565	0.972657636	0	0.087382224	0	1	0	5.835945816	0	468.113051	17.50783745	52.11747468	8.753918724	26.05873734	2.917972908	0	4.86328818	6.514684335	0.972657636	0	7	398.57	9	912.86	17.5078372955322	32.5734214782715
707	59	2010-12-03	3	5	0	18.6666660308838	41.3333320617676	0	60	3	2	207	87	1	1	1	0	1	11	900.7001648	1467.00565	0.972657636	0	0.087382224	0	1	0	5.835945816	0	468.113051	17.50783745	52.11747468	8.753918724	26.05873734	2.917972908	0	4.86328818	6.514684335	0.972657636	0	7	398.57	9	912.86	17.5078372955322	32.5734214782715
708	59	2010-12-03	4	5	0	41	19	0	60	3	2	207	87	1	1	1	0	1	11	900.7001648	1467.00565	0.972657636	0	0.087382224	0	1	0	5.835945816	0	468.113051	17.50783745	52.11747468	8.753918724	26.05873734	2.917972908	0	4.86328818	6.514684335	0.972657636	0	7	398.57	9	912.86	17.5078372955322	32.5734214782715
709	59	2010-12-04	1	6	1	13	47	0	60	1	2	207	87	1	1	1	0	1	11	900.7001648	1467.00565	0.972657636	0	0.087382224	0	1	0	5.835945816	0	468.113051	17.50783745	52.11747468	8.753918724	26.05873734	2.917972908	0	4.86328818	6.514684335	0.972657636	0	7	398.57	9	912.86	17.5078372955322	32.5734214782715
710	59	2010-12-04	2	6	1	46.6666679382324	13.3333330154419	0	60	3	2	207	87	1	1	1	0	1	11	900.7001648	1467.00565	0.972657636	0	0.087382224	0	1	0	5.835945816	0	468.113051	17.50783745	52.11747468	8.753918724	26.05873734	2.917972908	0	4.86328818	6.514684335	0.972657636	0	7	398.57	9	912.86	17.5078372955322	32.5734214782715
711	59	2010-12-04	3	6	1	25	34.6666679382324	0.333333343267441	60	3	2	207	87	1	1	1	0	1	11	900.7001648	1467.00565	0.972657636	0	0.087382224	0	1	0	5.835945816	0	468.113051	17.50783745	52.11747468	8.753918724	26.05873734	2.917972908	0	4.86328818	6.514684335	0.972657636	0	7	398.57	9	912.86	17.5078372955322	32.5734214782715
712	59	2010-12-04	4	6	1	17.6666660308838	42.3333320617676	0	60	3	2	207	87	1	1	1	0	1	11	900.7001648	1467.00565	0.972657636	0	0.087382224	0	1	0	5.835945816	0	468.113051	17.50783745	52.11747468	8.753918724	26.05873734	2.917972908	0	4.86328818	6.514684335	0.972657636	0	7	398.57	9	912.86	17.5078372955322	32.5734214782715
713	59	2010-12-06	0	1	0	2	58	0	60	1	2	207	87	1	1	1	0	1	11	900.7001648	1467.00565	0.972657636	0	0.087382224	0	1	0	5.835945816	0	468.113051	17.50783745	52.11747468	8.753918724	26.05873734	2.917972908	0	4.86328818	6.514684335	0.972657636	0	7	398.57	9	912.86	17.5078372955322	32.5734214782715
714	59	2010-12-07	0	2	0	0	6	1	7	1	2	207	87	1	1	1	0	1	11	900.7001648	1467.00565	0.972657636	0	0.087382224	0	1	0	5.835945816	0	468.113051	17.50783745	52.11747468	8.753918724	26.05873734	2.917972908	0	4.86328818	6.514684335	0.972657636	0	7	398.57	9	912.86	17.5078372955322	32.5734214782715
715	59	2010-12-07	1	2	0	11.5	47.6666679382324	0.833333313465118	60	3	2	207	87	1	1	1	0	1	11	900.7001648	1467.00565	0.972657636	0	0.087382224	0	1	0	5.835945816	0	468.113051	17.50783745	52.11747468	8.753918724	26.05873734	2.917972908	0	4.86328818	6.514684335	0.972657636	0	7	398.57	9	912.86	17.5078372955322	32.5734214782715
716	59	2010-12-07	2	2	0	11	49	0	60	3	2	207	87	1	1	1	0	1	11	900.7001648	1467.00565	0.972657636	0	0.087382224	0	1	0	5.835945816	0	468.113051	17.50783745	52.11747468	8.753918724	26.05873734	2.917972908	0	4.86328818	6.514684335	0.972657636	0	7	398.57	9	912.86	17.5078372955322	32.5734214782715
717	59	2010-12-07	3	2	0	14.6666669845581	44.3333320617676	1	60	3	2	207	87	1	1	1	0	1	11	900.7001648	1467.00565	0.972657636	0	0.087382224	0	1	0	5.835945816	0	468.113051	17.50783745	52.11747468	8.753918724	26.05873734	2.917972908	0	4.86328818	6.514684335	0.972657636	0	7	398.57	9	912.86	17.5078372955322	32.5734214782715
718	59	2010-12-07	4	2	0	48.6666679382324	11	0.333333343267441	60	3	2	207	87	1	1	1	0	1	11	900.7001648	1467.00565	0.972657636	0	0.087382224	0	1	0	5.835945816	0	468.113051	17.50783745	52.11747468	8.753918724	26.05873734	2.917972908	0	4.86328818	6.514684335	0.972657636	0	7	398.57	9	912.86	17.5078372955322	32.5734214782715
719	59	2010-12-08	0	3	0	5	45	0	50	1	2	207	87	1	1	1	0	1	11	900.7001648	1467.00565	0.972657636	0	0.087382224	0	1	0	5.835945816	0	468.113051	17.50783745	52.11747468	8.753918724	26.05873734	2.917972908	0	4.86328818	6.514684335	0.972657636	0	7	398.57	9	912.86	17.5078372955322	32.5734214782715
720	59	2010-12-08	1	3	0	22.6666660308838	35	2.33333325386047	60	3	2	207	87	1	1	1	0	1	11	900.7001648	1467.00565	0.972657636	0	0.087382224	0	1	0	5.835945816	0	468.113051	17.50783745	52.11747468	8.753918724	26.05873734	2.917972908	0	4.86328818	6.514684335	0.972657636	0	7	398.57	9	912.86	17.5078372955322	32.5734214782715
721	59	2010-12-08	2	3	0	24	35	1	60	3	2	207	87	1	1	1	0	1	11	900.7001648	1467.00565	0.972657636	0	0.087382224	0	1	0	5.835945816	0	468.113051	17.50783745	52.11747468	8.753918724	26.05873734	2.917972908	0	4.86328818	6.514684335	0.972657636	0	7	398.57	9	912.86	17.5078372955322	32.5734214782715
722	59	2010-12-08	3	3	0	13.3333330154419	45.5	1.16666662693024	60	3	2	207	87	1	1	1	0	1	11	900.7001648	1467.00565	0.972657636	0	0.087382224	0	1	0	5.835945816	0	468.113051	17.50783745	52.11747468	8.753918724	26.05873734	2.917972908	0	4.86328818	6.514684335	0.972657636	0	7	398.57	9	912.86	17.5078372955322	32.5734214782715
723	59	2010-12-08	4	3	0	41	19	0	60	3	2	207	87	1	1	1	0	1	11	900.7001648	1467.00565	0.972657636	0	0.087382224	0	1	0	5.835945816	0	468.113051	17.50783745	52.11747468	8.753918724	26.05873734	2.917972908	0	4.86328818	6.514684335	0.972657636	0	7	398.57	9	912.86	17.5078372955322	32.5734214782715
724	66	2010-12-01	0	3	0	3	16	1	20	1	2	207	76	0	1	0	1	1	10	887.3043179	1138.335613	0.792558912	5.034992018	0.087382224	0.087382224	1	1	6.340471293	10.06998404	229.8802174	15.05861932	20.13996807	7.133030205	10.06998404	2.377676735	10.06998404	3.962794558	5.034992018	0	0	7	337.43	45.86	905.14	13.4735012054443	25.1749591827393
725	66	2010-12-01	1	3	0	5.33333349227905	44.6666679382324	10	60	3	2	207	76	0	1	0	1	1	10	887.3043179	1138.335613	0.792558912	5.034992018	0.087382224	0.087382224	1	1	6.340471293	10.06998404	229.8802174	15.05861932	20.13996807	7.133030205	10.06998404	2.377676735	10.06998404	3.962794558	5.034992018	0	0	7	337.43	45.86	905.14	13.4735012054443	25.1749591827393
726	66	2010-12-01	2	3	0	4.66666650772095	44	11.3333330154419	60	3	2	207	76	0	1	0	1	1	10	887.3043179	1138.335613	0.792558912	5.034992018	0.087382224	0.087382224	1	1	6.340471293	10.06998404	229.8802174	15.05861932	20.13996807	7.133030205	10.06998404	2.377676735	10.06998404	3.962794558	5.034992018	0	0	7	337.43	45.86	905.14	13.4735012054443	25.1749591827393
727	66	2010-12-01	3	3	0	25	32.7999992370605	2.20000004768372	60	3	2	207	76	0	1	0	1	1	10	887.3043179	1138.335613	0.792558912	5.034992018	0.087382224	0.087382224	1	1	6.340471293	10.06998404	229.8802174	15.05861932	20.13996807	7.133030205	10.06998404	2.377676735	10.06998404	3.962794558	5.034992018	0	0	7	337.43	45.86	905.14	13.4735012054443	25.1749591827393
728	66	2010-12-01	4	3	0	36.75	20.25	3	60	3	2	207	76	0	1	0	1	1	10	887.3043179	1138.335613	0.792558912	5.034992018	0.087382224	0.087382224	1	1	6.340471293	10.06998404	229.8802174	15.05861932	20.13996807	7.133030205	10.06998404	2.377676735	10.06998404	3.962794558	5.034992018	0	0	7	337.43	45.86	905.14	13.4735012054443	25.1749591827393
729	66	2010-12-02	4	4	0	13.5	46.5	0	60	2	2	207	76	0	1	0	1	1	10	887.3043179	1138.335613	0.792558912	5.034992018	0.087382224	0.087382224	1	1	6.340471293	10.06998404	229.8802174	15.05861932	20.13996807	7.133030205	10.06998404	2.377676735	10.06998404	3.962794558	5.034992018	0	0	7	337.43	45.86	905.14	13.4735012054443	25.1749591827393
730	66	2010-12-04	1	6	1	12.3333330154419	26.6666660308838	1.66666662693024	40.6666679382324	3	2	207	76	0	1	0	1	1	10	887.3043179	1138.335613	0.792558912	5.034992018	0.087382224	0.087382224	1	1	6.340471293	10.06998404	229.8802174	15.05861932	20.13996807	7.133030205	10.06998404	2.377676735	10.06998404	3.962794558	5.034992018	0	0	7	337.43	45.86	905.14	13.4735012054443	25.1749591827393
731	66	2010-12-04	2	6	1	40	19.3333339691162	0.666666686534882	60	3	2	207	76	0	1	0	1	1	10	887.3043179	1138.335613	0.792558912	5.034992018	0.087382224	0.087382224	1	1	6.340471293	10.06998404	229.8802174	15.05861932	20.13996807	7.133030205	10.06998404	2.377676735	10.06998404	3.962794558	5.034992018	0	0	7	337.43	45.86	905.14	13.4735012054443	25.1749591827393
732	66	2010-12-04	3	6	1	5	54	1	60	1	2	207	76	0	1	0	1	1	10	887.3043179	1138.335613	0.792558912	5.034992018	0.087382224	0.087382224	1	1	6.340471293	10.06998404	229.8802174	15.05861932	20.13996807	7.133030205	10.06998404	2.377676735	10.06998404	3.962794558	5.034992018	0	0	7	337.43	45.86	905.14	13.4735012054443	25.1749591827393
733	66	2010-12-05	0	0	1	3.5	28.5	1	33	2	2	207	76	0	1	0	1	1	10	887.3043179	1138.335613	0.792558912	5.034992018	0.087382224	0.087382224	1	1	6.340471293	10.06998404	229.8802174	15.05861932	20.13996807	7.133030205	10.06998404	2.377676735	10.06998404	3.962794558	5.034992018	0	0	7	337.43	45.86	905.14	13.4735012054443	25.1749591827393
734	66	2010-12-05	1	0	1	15.6666669845581	41.6666679382324	2.66666674613953	60	3	2	207	76	0	1	0	1	1	10	887.3043179	1138.335613	0.792558912	5.034992018	0.087382224	0.087382224	1	1	6.340471293	10.06998404	229.8802174	15.05861932	20.13996807	7.133030205	10.06998404	2.377676735	10.06998404	3.962794558	5.034992018	0	0	7	337.43	45.86	905.14	13.4735012054443	25.1749591827393
735	66	2010-12-05	2	0	1	24	36	0	60	3	2	207	76	0	1	0	1	1	10	887.3043179	1138.335613	0.792558912	5.034992018	0.087382224	0.087382224	1	1	6.340471293	10.06998404	229.8802174	15.05861932	20.13996807	7.133030205	10.06998404	2.377676735	10.06998404	3.962794558	5.034992018	0	0	7	337.43	45.86	905.14	13.4735012054443	25.1749591827393
736	66	2010-12-05	3	0	1	27.3999996185303	31	1.60000002384186	60	3	2	207	76	0	1	0	1	1	10	887.3043179	1138.335613	0.792558912	5.034992018	0.087382224	0.087382224	1	1	6.340471293	10.06998404	229.8802174	15.05861932	20.13996807	7.133030205	10.06998404	2.377676735	10.06998404	3.962794558	5.034992018	0	0	7	337.43	45.86	905.14	13.4735012054443	25.1749591827393
737	66	2010-12-05	4	0	1	22	37.3333320617676	0.666666686534882	60	3	2	207	76	0	1	0	1	1	10	887.3043179	1138.335613	0.792558912	5.034992018	0.087382224	0.087382224	1	1	6.340471293	10.06998404	229.8802174	15.05861932	20.13996807	7.133030205	10.06998404	2.377676735	10.06998404	3.962794558	5.034992018	0	0	7	337.43	45.86	905.14	13.4735012054443	25.1749591827393
738	66	2010-12-06	0	1	0	3	20	0	23	1	2	207	76	0	1	0	1	1	10	887.3043179	1138.335613	0.792558912	5.034992018	0.087382224	0.087382224	1	1	6.340471293	10.06998404	229.8802174	15.05861932	20.13996807	7.133030205	10.06998404	2.377676735	10.06998404	3.962794558	5.034992018	0	0	7	337.43	45.86	905.14	13.4735012054443	25.1749591827393
739	66	2010-12-06	1	1	0	13.6666669845581	41.6666679382324	4.66666650772095	60	3	2	207	76	0	1	0	1	1	10	887.3043179	1138.335613	0.792558912	5.034992018	0.087382224	0.087382224	1	1	6.340471293	10.06998404	229.8802174	15.05861932	20.13996807	7.133030205	10.06998404	2.377676735	10.06998404	3.962794558	5.034992018	0	0	7	337.43	45.86	905.14	13.4735012054443	25.1749591827393
740	66	2010-12-06	2	1	0	7	50.3333320617676	2.66666674613953	60	3	2	207	76	0	1	0	1	1	10	887.3043179	1138.335613	0.792558912	5.034992018	0.087382224	0.087382224	1	1	6.340471293	10.06998404	229.8802174	15.05861932	20.13996807	7.133030205	10.06998404	2.377676735	10.06998404	3.962794558	5.034992018	0	0	7	337.43	45.86	905.14	13.4735012054443	25.1749591827393
741	66	2010-12-06	3	1	0	32.3333320617676	27	0.666666686534882	60	3	2	207	76	0	1	0	1	1	10	887.3043179	1138.335613	0.792558912	5.034992018	0.087382224	0.087382224	1	1	6.340471293	10.06998404	229.8802174	15.05861932	20.13996807	7.133030205	10.06998404	2.377676735	10.06998404	3.962794558	5.034992018	0	0	7	337.43	45.86	905.14	13.4735012054443	25.1749591827393
742	66	2010-12-06	4	1	0	30.3999996185303	29.3999996185303	0.200000002980232	60	3	2	207	76	0	1	0	1	1	10	887.3043179	1138.335613	0.792558912	5.034992018	0.087382224	0.087382224	1	1	6.340471293	10.06998404	229.8802174	15.05861932	20.13996807	7.133030205	10.06998404	2.377676735	10.06998404	3.962794558	5.034992018	0	0	7	337.43	45.86	905.14	13.4735012054443	25.1749591827393
743	66	2010-12-07	0	2	0	23.5	19	0	42.5	2	2	207	76	0	1	0	1	1	10	887.3043179	1138.335613	0.792558912	5.034992018	0.087382224	0.087382224	1	1	6.340471293	10.06998404	229.8802174	15.05861932	20.13996807	7.133030205	10.06998404	2.377676735	10.06998404	3.962794558	5.034992018	0	0	7	337.43	45.86	905.14	13.4735012054443	25.1749591827393
744	66	2010-12-07	1	2	0	6	44.25	9.75	60	3	2	207	76	0	1	0	1	1	10	887.3043179	1138.335613	0.792558912	5.034992018	0.087382224	0.087382224	1	1	6.340471293	10.06998404	229.8802174	15.05861932	20.13996807	7.133030205	10.06998404	2.377676735	10.06998404	3.962794558	5.034992018	0	0	7	337.43	45.86	905.14	13.4735012054443	25.1749591827393
745	66	2010-12-07	2	2	0	12.6666669845581	45	2.33333325386047	60	3	2	207	76	0	1	0	1	1	10	887.3043179	1138.335613	0.792558912	5.034992018	0.087382224	0.087382224	1	1	6.340471293	10.06998404	229.8802174	15.05861932	20.13996807	7.133030205	10.06998404	2.377676735	10.06998404	3.962794558	5.034992018	0	0	7	337.43	45.86	905.14	13.4735012054443	25.1749591827393
746	66	2010-12-07	3	2	0	23	37	0	60	3	2	207	76	0	1	0	1	1	10	887.3043179	1138.335613	0.792558912	5.034992018	0.087382224	0.087382224	1	1	6.340471293	10.06998404	229.8802174	15.05861932	20.13996807	7.133030205	10.06998404	2.377676735	10.06998404	3.962794558	5.034992018	0	0	7	337.43	45.86	905.14	13.4735012054443	25.1749591827393
747	66	2010-12-07	4	2	0	26.25	33.25	0.5	60	3	2	207	76	0	1	0	1	1	10	887.3043179	1138.335613	0.792558912	5.034992018	0.087382224	0.087382224	1	1	6.340471293	10.06998404	229.8802174	15.05861932	20.13996807	7.133030205	10.06998404	2.377676735	10.06998404	3.962794558	5.034992018	0	0	7	337.43	45.86	905.14	13.4735012054443	25.1749591827393
748	66	2010-12-08	0	3	0	0	23	0	23	1	2	207	76	0	1	0	1	1	10	887.3043179	1138.335613	0.792558912	5.034992018	0.087382224	0.087382224	1	1	6.340471293	10.06998404	229.8802174	15.05861932	20.13996807	7.133030205	10.06998404	2.377676735	10.06998404	3.962794558	5.034992018	0	0	7	337.43	45.86	905.14	13.4735012054443	25.1749591827393
749	66	2010-12-08	1	3	0	13.6000003814697	36.7999992370605	9.60000038146973	60	3	2	207	76	0	1	0	1	1	10	887.3043179	1138.335613	0.792558912	5.034992018	0.087382224	0.087382224	1	1	6.340471293	10.06998404	229.8802174	15.05861932	20.13996807	7.133030205	10.06998404	2.377676735	10.06998404	3.962794558	5.034992018	0	0	7	337.43	45.86	905.14	13.4735012054443	25.1749591827393
750	66	2010-12-08	2	3	0	8.33333301544189	44.1666679382324	7.5	60	3	2	207	76	0	1	0	1	1	10	887.3043179	1138.335613	0.792558912	5.034992018	0.087382224	0.087382224	1	1	6.340471293	10.06998404	229.8802174	15.05861932	20.13996807	7.133030205	10.06998404	2.377676735	10.06998404	3.962794558	5.034992018	0	0	7	337.43	45.86	905.14	13.4735012054443	25.1749591827393
751	66	2010-12-08	3	3	0	8.5	47.75	3.75	60	3	2	207	76	0	1	0	1	1	10	887.3043179	1138.335613	0.792558912	5.034992018	0.087382224	0.087382224	1	1	6.340471293	10.06998404	229.8802174	15.05861932	20.13996807	7.133030205	10.06998404	2.377676735	10.06998404	3.962794558	5.034992018	0	0	7	337.43	45.86	905.14	13.4735012054443	25.1749591827393
752	66	2010-12-08	4	3	0	33.3333320617676	26.3333339691162	0.333333343267441	60	3	2	207	76	0	1	0	1	1	10	887.3043179	1138.335613	0.792558912	5.034992018	0.087382224	0.087382224	1	1	6.340471293	10.06998404	229.8802174	15.05861932	20.13996807	7.133030205	10.06998404	2.377676735	10.06998404	3.962794558	5.034992018	0	0	7	337.43	45.86	905.14	13.4735012054443	25.1749591827393
753	70	2010-12-02	1	4	0	17.7999992370605	34.7999992370605	1.20000004768372	53.7999992370605	3	2	207	79	1	1	0	1	1	11	1156.426087	924.9865309	1.875889181	3.30519943	0.087382224	0.087382224	1	1	9.379445904	16.52599715	42.28989021	22.51067017	19.83119658	14.06916886	16.52599715	8.441501313	0	10.31739049	3.30519943	0.93794459	0	7	367.43	12	799.29	33.7660064697266	19.8311958312988
754	70	2010-12-02	2	4	0	31.3333339691162	28.3333339691162	0.333333343267441	60	3	2	207	79	1	1	0	1	1	11	1156.426087	924.9865309	1.875889181	3.30519943	0.087382224	0.087382224	1	1	9.379445904	16.52599715	42.28989021	22.51067017	19.83119658	14.06916886	16.52599715	8.441501313	0	10.31739049	3.30519943	0.93794459	0	7	367.43	12	799.29	33.7660064697266	19.8311958312988
755	70	2010-12-02	3	4	0	27	33	0	60	3	2	207	79	1	1	0	1	1	11	1156.426087	924.9865309	1.875889181	3.30519943	0.087382224	0.087382224	1	1	9.379445904	16.52599715	42.28989021	22.51067017	19.83119658	14.06916886	16.52599715	8.441501313	0	10.31739049	3.30519943	0.93794459	0	7	367.43	12	799.29	33.7660064697266	19.8311958312988
756	70	2010-12-02	4	4	0	26.3333339691162	33.3333320617676	0.333333343267441	60	3	2	207	79	1	1	0	1	1	11	1156.426087	924.9865309	1.875889181	3.30519943	0.087382224	0.087382224	1	1	9.379445904	16.52599715	42.28989021	22.51067017	19.83119658	14.06916886	16.52599715	8.441501313	0	10.31739049	3.30519943	0.93794459	0	7	367.43	12	799.29	33.7660064697266	19.8311958312988
757	70	2010-12-03	0	5	0	8.5	22	0.5	31	2	2	207	79	1	1	0	1	1	11	1156.426087	924.9865309	1.875889181	3.30519943	0.087382224	0.087382224	1	1	9.379445904	16.52599715	42.28989021	22.51067017	19.83119658	14.06916886	16.52599715	8.441501313	0	10.31739049	3.30519943	0.93794459	0	7	367.43	12	799.29	33.7660064697266	19.8311958312988
758	70	2010-12-03	1	5	0	21.5	37.25	1.25	60	3	2	207	79	1	1	0	1	1	11	1156.426087	924.9865309	1.875889181	3.30519943	0.087382224	0.087382224	1	1	9.379445904	16.52599715	42.28989021	22.51067017	19.83119658	14.06916886	16.52599715	8.441501313	0	10.31739049	3.30519943	0.93794459	0	7	367.43	12	799.29	33.7660064697266	19.8311958312988
759	70	2010-12-03	2	5	0	26	33.25	0.75	60	3	2	207	79	1	1	0	1	1	11	1156.426087	924.9865309	1.875889181	3.30519943	0.087382224	0.087382224	1	1	9.379445904	16.52599715	42.28989021	22.51067017	19.83119658	14.06916886	16.52599715	8.441501313	0	10.31739049	3.30519943	0.93794459	0	7	367.43	12	799.29	33.7660064697266	19.8311958312988
760	70	2010-12-03	3	5	0	20	38.3333320617676	1.66666662693024	60	3	2	207	79	1	1	0	1	1	11	1156.426087	924.9865309	1.875889181	3.30519943	0.087382224	0.087382224	1	1	9.379445904	16.52599715	42.28989021	22.51067017	19.83119658	14.06916886	16.52599715	8.441501313	0	10.31739049	3.30519943	0.93794459	0	7	367.43	12	799.29	33.7660064697266	19.8311958312988
761	70	2010-12-03	4	5	0	23.6666660308838	36	0.333333343267441	60	3	2	207	79	1	1	0	1	1	11	1156.426087	924.9865309	1.875889181	3.30519943	0.087382224	0.087382224	1	1	9.379445904	16.52599715	42.28989021	22.51067017	19.83119658	14.06916886	16.52599715	8.441501313	0	10.31739049	3.30519943	0.93794459	0	7	367.43	12	799.29	33.7660064697266	19.8311958312988
762	70	2010-12-04	0	6	1	0	1	0	1	1	2	207	79	1	1	0	1	1	11	1156.426087	924.9865309	1.875889181	3.30519943	0.087382224	0.087382224	1	1	9.379445904	16.52599715	42.28989021	22.51067017	19.83119658	14.06916886	16.52599715	8.441501313	0	10.31739049	3.30519943	0.93794459	0	7	367.43	12	799.29	33.7660064697266	19.8311958312988
763	70	2010-12-04	1	6	1	14.6666669845581	26	1.66666662693024	42.3333320617676	3	2	207	79	1	1	0	1	1	11	1156.426087	924.9865309	1.875889181	3.30519943	0.087382224	0.087382224	1	1	9.379445904	16.52599715	42.28989021	22.51067017	19.83119658	14.06916886	16.52599715	8.441501313	0	10.31739049	3.30519943	0.93794459	0	7	367.43	12	799.29	33.7660064697266	19.8311958312988
764	70	2010-12-04	2	6	1	28.2000007629395	31.6000003814697	0.200000002980232	60	3	2	207	79	1	1	0	1	1	11	1156.426087	924.9865309	1.875889181	3.30519943	0.087382224	0.087382224	1	1	9.379445904	16.52599715	42.28989021	22.51067017	19.83119658	14.06916886	16.52599715	8.441501313	0	10.31739049	3.30519943	0.93794459	0	7	367.43	12	799.29	33.7660064697266	19.8311958312988
765	70	2010-12-04	3	6	1	42.4000015258789	17.3999996185303	0.200000002980232	60	3	2	207	79	1	1	0	1	1	11	1156.426087	924.9865309	1.875889181	3.30519943	0.087382224	0.087382224	1	1	9.379445904	16.52599715	42.28989021	22.51067017	19.83119658	14.06916886	16.52599715	8.441501313	0	10.31739049	3.30519943	0.93794459	0	7	367.43	12	799.29	33.7660064697266	19.8311958312988
766	70	2010-12-04	4	6	1	28	21.6666660308838	0.333333343267441	50	3	2	207	79	1	1	0	1	1	11	1156.426087	924.9865309	1.875889181	3.30519943	0.087382224	0.087382224	1	1	9.379445904	16.52599715	42.28989021	22.51067017	19.83119658	14.06916886	16.52599715	8.441501313	0	10.31739049	3.30519943	0.93794459	0	7	367.43	12	799.29	33.7660064697266	19.8311958312988
767	70	2010-12-05	0	0	1	13	40.5	4.5	58	2	2	207	79	1	1	0	1	1	11	1156.426087	924.9865309	1.875889181	3.30519943	0.087382224	0.087382224	1	1	9.379445904	16.52599715	42.28989021	22.51067017	19.83119658	14.06916886	16.52599715	8.441501313	0	10.31739049	3.30519943	0.93794459	0	7	367.43	12	799.29	33.7660064697266	19.8311958312988
768	70	2010-12-05	1	0	1	12.6666669845581	45	2.33333325386047	60	3	2	207	79	1	1	0	1	1	11	1156.426087	924.9865309	1.875889181	3.30519943	0.087382224	0.087382224	1	1	9.379445904	16.52599715	42.28989021	22.51067017	19.83119658	14.06916886	16.52599715	8.441501313	0	10.31739049	3.30519943	0.93794459	0	7	367.43	12	799.29	33.7660064697266	19.8311958312988
769	70	2010-12-05	2	0	1	25.3333339691162	34	0.666666686534882	60	3	2	207	79	1	1	0	1	1	11	1156.426087	924.9865309	1.875889181	3.30519943	0.087382224	0.087382224	1	1	9.379445904	16.52599715	42.28989021	22.51067017	19.83119658	14.06916886	16.52599715	8.441501313	0	10.31739049	3.30519943	0.93794459	0	7	367.43	12	799.29	33.7660064697266	19.8311958312988
770	70	2010-12-05	3	0	1	28	32	0	60	3	2	207	79	1	1	0	1	1	11	1156.426087	924.9865309	1.875889181	3.30519943	0.087382224	0.087382224	1	1	9.379445904	16.52599715	42.28989021	22.51067017	19.83119658	14.06916886	16.52599715	8.441501313	0	10.31739049	3.30519943	0.93794459	0	7	367.43	12	799.29	33.7660064697266	19.8311958312988
771	70	2010-12-05	4	0	1	34.25	25.75	0	60	3	2	207	79	1	1	0	1	1	11	1156.426087	924.9865309	1.875889181	3.30519943	0.087382224	0.087382224	1	1	9.379445904	16.52599715	42.28989021	22.51067017	19.83119658	14.06916886	16.52599715	8.441501313	0	10.31739049	3.30519943	0.93794459	0	7	367.43	12	799.29	33.7660064697266	19.8311958312988
772	70	2010-12-06	0	1	0	0	2	1	3	1	2	207	79	1	1	0	1	1	11	1156.426087	924.9865309	1.875889181	3.30519943	0.087382224	0.087382224	1	1	9.379445904	16.52599715	42.28989021	22.51067017	19.83119658	14.06916886	16.52599715	8.441501313	0	10.31739049	3.30519943	0.93794459	0	7	367.43	12	799.29	33.7660064697266	19.8311958312988
773	70	2010-12-06	1	1	0	25.3333339691162	32	0.333333343267441	57.6666679382324	3	2	207	79	1	1	0	1	1	11	1156.426087	924.9865309	1.875889181	3.30519943	0.087382224	0.087382224	1	1	9.379445904	16.52599715	42.28989021	22.51067017	19.83119658	14.06916886	16.52599715	8.441501313	0	10.31739049	3.30519943	0.93794459	0	7	367.43	12	799.29	33.7660064697266	19.8311958312988
774	70	2010-12-06	2	1	0	31.6666660308838	28	0.333333343267441	60	3	2	207	79	1	1	0	1	1	11	1156.426087	924.9865309	1.875889181	3.30519943	0.087382224	0.087382224	1	1	9.379445904	16.52599715	42.28989021	22.51067017	19.83119658	14.06916886	16.52599715	8.441501313	0	10.31739049	3.30519943	0.93794459	0	7	367.43	12	799.29	33.7660064697266	19.8311958312988
775	70	2010-12-06	3	1	0	16.3333339691162	41.3333320617676	2.33333325386047	60	3	2	207	79	1	1	0	1	1	11	1156.426087	924.9865309	1.875889181	3.30519943	0.087382224	0.087382224	1	1	9.379445904	16.52599715	42.28989021	22.51067017	19.83119658	14.06916886	16.52599715	8.441501313	0	10.31739049	3.30519943	0.93794459	0	7	367.43	12	799.29	33.7660064697266	19.8311958312988
776	70	2010-12-06	4	1	0	43	16.7999992370605	0.200000002980232	60	3	2	207	79	1	1	0	1	1	11	1156.426087	924.9865309	1.875889181	3.30519943	0.087382224	0.087382224	1	1	9.379445904	16.52599715	42.28989021	22.51067017	19.83119658	14.06916886	16.52599715	8.441501313	0	10.31739049	3.30519943	0.93794459	0	7	367.43	12	799.29	33.7660064697266	19.8311958312988
777	70	2010-12-07	1	2	0	16.3333339691162	42	1.66666662693024	60	3	2	207	79	1	1	0	1	1	11	1156.426087	924.9865309	1.875889181	3.30519943	0.087382224	0.087382224	1	1	9.379445904	16.52599715	42.28989021	22.51067017	19.83119658	14.06916886	16.52599715	8.441501313	0	10.31739049	3.30519943	0.93794459	0	7	367.43	12	799.29	33.7660064697266	19.8311958312988
778	70	2010-12-07	2	2	0	33	26.3333339691162	0.666666686534882	60	3	2	207	79	1	1	0	1	1	11	1156.426087	924.9865309	1.875889181	3.30519943	0.087382224	0.087382224	1	1	9.379445904	16.52599715	42.28989021	22.51067017	19.83119658	14.06916886	16.52599715	8.441501313	0	10.31739049	3.30519943	0.93794459	0	7	367.43	12	799.29	33.7660064697266	19.8311958312988
779	70	2010-12-07	3	2	0	16.3333339691162	41.6666679382324	2	60	3	2	207	79	1	1	0	1	1	11	1156.426087	924.9865309	1.875889181	3.30519943	0.087382224	0.087382224	1	1	9.379445904	16.52599715	42.28989021	22.51067017	19.83119658	14.06916886	16.52599715	8.441501313	0	10.31739049	3.30519943	0.93794459	0	7	367.43	12	799.29	33.7660064697266	19.8311958312988
780	70	2010-12-07	4	2	0	29.3333339691162	29.6666660308838	1	60	3	2	207	79	1	1	0	1	1	11	1156.426087	924.9865309	1.875889181	3.30519943	0.087382224	0.087382224	1	1	9.379445904	16.52599715	42.28989021	22.51067017	19.83119658	14.06916886	16.52599715	8.441501313	0	10.31739049	3.30519943	0.93794459	0	7	367.43	12	799.29	33.7660064697266	19.8311958312988
781	74	2010-12-01	1	3	0	7.59999990463257	38.2000007629395	4.40000009536743	50.2000007629395	3	2	207	81	0	1	1	1	1	9	1188.075336	883.5809344	2.886997997	3.379547207	0.087382224	0.087382224	1	1	9.623326657	16.89773604	83.56300311	24.05831664	13.51818883	15.39732265	10.13864162	10.58565932	0	9.623326657	3.379547207	0.962332666	3.379547207	8	478.75	25.5	867.75	36.5686416625977	16.8977355957031
782	74	2010-12-01	2	3	0	29.6666660308838	27.3333339691162	3	60	3	2	207	81	0	1	1	1	1	9	1188.075336	883.5809344	2.886997997	3.379547207	0.087382224	0.087382224	1	1	9.623326657	16.89773604	83.56300311	24.05831664	13.51818883	15.39732265	10.13864162	10.58565932	0	9.623326657	3.379547207	0.962332666	3.379547207	8	478.75	25.5	867.75	36.5686416625977	16.8977355957031
783	74	2010-12-01	3	3	0	26	33.3333320617676	0.666666686534882	60	3	2	207	81	0	1	1	1	1	9	1188.075336	883.5809344	2.886997997	3.379547207	0.087382224	0.087382224	1	1	9.623326657	16.89773604	83.56300311	24.05831664	13.51818883	15.39732265	10.13864162	10.58565932	0	9.623326657	3.379547207	0.962332666	3.379547207	8	478.75	25.5	867.75	36.5686416625977	16.8977355957031
784	74	2010-12-01	4	3	0	44.7999992370605	15	0.200000002980232	60	3	2	207	81	0	1	1	1	1	9	1188.075336	883.5809344	2.886997997	3.379547207	0.087382224	0.087382224	1	1	9.623326657	16.89773604	83.56300311	24.05831664	13.51818883	15.39732265	10.13864162	10.58565932	0	9.623326657	3.379547207	0.962332666	3.379547207	8	478.75	25.5	867.75	36.5686416625977	16.8977355957031
785	74	2010-12-02	0	4	0	60	0	0	60	1	2	207	81	0	1	1	1	1	9	1188.075336	883.5809344	2.886997997	3.379547207	0.087382224	0.087382224	1	1	9.623326657	16.89773604	83.56300311	24.05831664	13.51818883	15.39732265	10.13864162	10.58565932	0	9.623326657	3.379547207	0.962332666	3.379547207	8	478.75	25.5	867.75	36.5686416625977	16.8977355957031
786	74	2010-12-02	1	4	0	19.6666660308838	39	1.33333337306976	60	3	2	207	81	0	1	1	1	1	9	1188.075336	883.5809344	2.886997997	3.379547207	0.087382224	0.087382224	1	1	9.623326657	16.89773604	83.56300311	24.05831664	13.51818883	15.39732265	10.13864162	10.58565932	0	9.623326657	3.379547207	0.962332666	3.379547207	8	478.75	25.5	867.75	36.5686416625977	16.8977355957031
787	74	2010-12-02	2	4	0	32.6666679382324	26.5	0.833333313465118	60	3	2	207	81	0	1	1	1	1	9	1188.075336	883.5809344	2.886997997	3.379547207	0.087382224	0.087382224	1	1	9.623326657	16.89773604	83.56300311	24.05831664	13.51818883	15.39732265	10.13864162	10.58565932	0	9.623326657	3.379547207	0.962332666	3.379547207	8	478.75	25.5	867.75	36.5686416625977	16.8977355957031
788	74	2010-12-02	3	4	0	49	10	1	60	3	2	207	81	0	1	1	1	1	9	1188.075336	883.5809344	2.886997997	3.379547207	0.087382224	0.087382224	1	1	9.623326657	16.89773604	83.56300311	24.05831664	13.51818883	15.39732265	10.13864162	10.58565932	0	9.623326657	3.379547207	0.962332666	3.379547207	8	478.75	25.5	867.75	36.5686416625977	16.8977355957031
789	74	2010-12-02	4	4	0	39	20	1	60	3	2	207	81	0	1	1	1	1	9	1188.075336	883.5809344	2.886997997	3.379547207	0.087382224	0.087382224	1	1	9.623326657	16.89773604	83.56300311	24.05831664	13.51818883	15.39732265	10.13864162	10.58565932	0	9.623326657	3.379547207	0.962332666	3.379547207	8	478.75	25.5	867.75	36.5686416625977	16.8977355957031
790	74	2010-12-03	0	5	0	5	19	1	25	1	2	207	81	0	1	1	1	1	9	1188.075336	883.5809344	2.886997997	3.379547207	0.087382224	0.087382224	1	1	9.623326657	16.89773604	83.56300311	24.05831664	13.51818883	15.39732265	10.13864162	10.58565932	0	9.623326657	3.379547207	0.962332666	3.379547207	8	478.75	25.5	867.75	36.5686416625977	16.8977355957031
791	74	2010-12-03	1	5	0	15.3333330154419	42	2.66666674613953	60	3	2	207	81	0	1	1	1	1	9	1188.075336	883.5809344	2.886997997	3.379547207	0.087382224	0.087382224	1	1	9.623326657	16.89773604	83.56300311	24.05831664	13.51818883	15.39732265	10.13864162	10.58565932	0	9.623326657	3.379547207	0.962332666	3.379547207	8	478.75	25.5	867.75	36.5686416625977	16.8977355957031
792	74	2010-12-03	2	5	0	30.6666660308838	28.6666660308838	0.666666686534882	60	3	2	207	81	0	1	1	1	1	9	1188.075336	883.5809344	2.886997997	3.379547207	0.087382224	0.087382224	1	1	9.623326657	16.89773604	83.56300311	24.05831664	13.51818883	15.39732265	10.13864162	10.58565932	0	9.623326657	3.379547207	0.962332666	3.379547207	8	478.75	25.5	867.75	36.5686416625977	16.8977355957031
793	74	2010-12-03	3	5	0	33.1666679382324	26.5	0.333333343267441	60	3	2	207	81	0	1	1	1	1	9	1188.075336	883.5809344	2.886997997	3.379547207	0.087382224	0.087382224	1	1	9.623326657	16.89773604	83.56300311	24.05831664	13.51818883	15.39732265	10.13864162	10.58565932	0	9.623326657	3.379547207	0.962332666	3.379547207	8	478.75	25.5	867.75	36.5686416625977	16.8977355957031
794	74	2010-12-03	4	5	0	45	15	0	60	3	2	207	81	0	1	1	1	1	9	1188.075336	883.5809344	2.886997997	3.379547207	0.087382224	0.087382224	1	1	9.623326657	16.89773604	83.56300311	24.05831664	13.51818883	15.39732265	10.13864162	10.58565932	0	9.623326657	3.379547207	0.962332666	3.379547207	8	478.75	25.5	867.75	36.5686416625977	16.8977355957031
795	74	2010-12-04	0	6	1	3	38	5	46	1	2	207	81	0	1	1	1	1	9	1188.075336	883.5809344	2.886997997	3.379547207	0.087382224	0.087382224	1	1	9.623326657	16.89773604	83.56300311	24.05831664	13.51818883	15.39732265	10.13864162	10.58565932	0	9.623326657	3.379547207	0.962332666	3.379547207	8	478.75	25.5	867.75	36.5686416625977	16.8977355957031
796	74	2010-12-04	1	6	1	18	28.25	3.25	49.5	3	2	207	81	0	1	1	1	1	9	1188.075336	883.5809344	2.886997997	3.379547207	0.087382224	0.087382224	1	1	9.623326657	16.89773604	83.56300311	24.05831664	13.51818883	15.39732265	10.13864162	10.58565932	0	9.623326657	3.379547207	0.962332666	3.379547207	8	478.75	25.5	867.75	36.5686416625977	16.8977355957031
797	74	2010-12-04	2	6	1	13.6666669845581	44	2.33333325386047	60	3	2	207	81	0	1	1	1	1	9	1188.075336	883.5809344	2.886997997	3.379547207	0.087382224	0.087382224	1	1	9.623326657	16.89773604	83.56300311	24.05831664	13.51818883	15.39732265	10.13864162	10.58565932	0	9.623326657	3.379547207	0.962332666	3.379547207	8	478.75	25.5	867.75	36.5686416625977	16.8977355957031
798	74	2010-12-04	3	6	1	31.3333339691162	28.3333339691162	0.333333343267441	60	3	2	207	81	0	1	1	1	1	9	1188.075336	883.5809344	2.886997997	3.379547207	0.087382224	0.087382224	1	1	9.623326657	16.89773604	83.56300311	24.05831664	13.51818883	15.39732265	10.13864162	10.58565932	0	9.623326657	3.379547207	0.962332666	3.379547207	8	478.75	25.5	867.75	36.5686416625977	16.8977355957031
799	74	2010-12-04	4	6	1	31.3333339691162	26.1666660308838	2.5	60	3	2	207	81	0	1	1	1	1	9	1188.075336	883.5809344	2.886997997	3.379547207	0.087382224	0.087382224	1	1	9.623326657	16.89773604	83.56300311	24.05831664	13.51818883	15.39732265	10.13864162	10.58565932	0	9.623326657	3.379547207	0.962332666	3.379547207	8	478.75	25.5	867.75	36.5686416625977	16.8977355957031
800	74	2010-12-05	1	0	1	4.5	51.5	4	60	2	2	207	81	0	1	1	1	1	9	1188.075336	883.5809344	2.886997997	3.379547207	0.087382224	0.087382224	1	1	9.623326657	16.89773604	83.56300311	24.05831664	13.51818883	15.39732265	10.13864162	10.58565932	0	9.623326657	3.379547207	0.962332666	3.379547207	8	478.75	25.5	867.75	36.5686416625977	16.8977355957031
801	74	2010-12-05	2	0	1	21.6666660308838	37.6666679382324	0.666666686534882	60	3	2	207	81	0	1	1	1	1	9	1188.075336	883.5809344	2.886997997	3.379547207	0.087382224	0.087382224	1	1	9.623326657	16.89773604	83.56300311	24.05831664	13.51818883	15.39732265	10.13864162	10.58565932	0	9.623326657	3.379547207	0.962332666	3.379547207	8	478.75	25.5	867.75	36.5686416625977	16.8977355957031
802	74	2010-12-05	3	0	1	32	27.6666660308838	0.333333343267441	60	3	2	207	81	0	1	1	1	1	9	1188.075336	883.5809344	2.886997997	3.379547207	0.087382224	0.087382224	1	1	9.623326657	16.89773604	83.56300311	24.05831664	13.51818883	15.39732265	10.13864162	10.58565932	0	9.623326657	3.379547207	0.962332666	3.379547207	8	478.75	25.5	867.75	36.5686416625977	16.8977355957031
803	74	2010-12-05	4	0	1	23.6666660308838	36.3333320617676	0	60	3	2	207	81	0	1	1	1	1	9	1188.075336	883.5809344	2.886997997	3.379547207	0.087382224	0.087382224	1	1	9.623326657	16.89773604	83.56300311	24.05831664	13.51818883	15.39732265	10.13864162	10.58565932	0	9.623326657	3.379547207	0.962332666	3.379547207	8	478.75	25.5	867.75	36.5686416625977	16.8977355957031
804	74	2010-12-07	1	2	0	41.3333320617676	5.66666650772095	4.33333349227905	51.3333320617676	3	2	207	81	0	1	1	1	1	9	1188.075336	883.5809344	2.886997997	3.379547207	0.087382224	0.087382224	1	1	9.623326657	16.89773604	83.56300311	24.05831664	13.51818883	15.39732265	10.13864162	10.58565932	0	9.623326657	3.379547207	0.962332666	3.379547207	8	478.75	25.5	867.75	36.5686416625977	16.8977355957031
805	74	2010-12-07	2	2	0	59	1	0	60	1	2	207	81	0	1	1	1	1	9	1188.075336	883.5809344	2.886997997	3.379547207	0.087382224	0.087382224	1	1	9.623326657	16.89773604	83.56300311	24.05831664	13.51818883	15.39732265	10.13864162	10.58565932	0	9.623326657	3.379547207	0.962332666	3.379547207	8	478.75	25.5	867.75	36.5686416625977	16.8977355957031
806	74	2010-12-08	0	3	0	5	23	1	29	1	2	207	81	0	1	1	1	1	9	1188.075336	883.5809344	2.886997997	3.379547207	0.087382224	0.087382224	1	1	9.623326657	16.89773604	83.56300311	24.05831664	13.51818883	15.39732265	10.13864162	10.58565932	0	9.623326657	3.379547207	0.962332666	3.379547207	8	478.75	25.5	867.75	36.5686416625977	16.8977355957031
807	74	2010-12-08	1	3	0	37.6666679382324	19.6666660308838	2.66666674613953	60	3	2	207	81	0	1	1	1	1	9	1188.075336	883.5809344	2.886997997	3.379547207	0.087382224	0.087382224	1	1	9.623326657	16.89773604	83.56300311	24.05831664	13.51818883	15.39732265	10.13864162	10.58565932	0	9.623326657	3.379547207	0.962332666	3.379547207	8	478.75	25.5	867.75	36.5686416625977	16.8977355957031
808	74	2010-12-08	2	3	0	32	20.2000007629395	7.80000019073486	60	3	2	207	81	0	1	1	1	1	9	1188.075336	883.5809344	2.886997997	3.379547207	0.087382224	0.087382224	1	1	9.623326657	16.89773604	83.56300311	24.05831664	13.51818883	15.39732265	10.13864162	10.58565932	0	9.623326657	3.379547207	0.962332666	3.379547207	8	478.75	25.5	867.75	36.5686416625977	16.8977355957031
809	74	2010-12-08	3	3	0	39.5	17.5	3	60	3	2	207	81	0	1	1	1	1	9	1188.075336	883.5809344	2.886997997	3.379547207	0.087382224	0.087382224	1	1	9.623326657	16.89773604	83.56300311	24.05831664	13.51818883	15.39732265	10.13864162	10.58565932	0	9.623326657	3.379547207	0.962332666	3.379547207	8	478.75	25.5	867.75	36.5686416625977	16.8977355957031
810	74	2010-12-08	4	3	0	24.25	20.25	0.75	45.25	3	2	207	81	0	1	1	1	1	9	1188.075336	883.5809344	2.886997997	3.379547207	0.087382224	0.087382224	1	1	9.623326657	16.89773604	83.56300311	24.05831664	13.51818883	15.39732265	10.13864162	10.58565932	0	9.623326657	3.379547207	0.962332666	3.379547207	8	478.75	25.5	867.75	36.5686416625977	16.8977355957031
811	77	2010-12-01	0	3	0	2	32	1	35	1	2	207	85	0	1	0	1	1	12	1142.255269	937.178978	0.91200097	3.938199243	0.087382224	0.087382224	1	1	9.120009698	15.75279697	85.88035757	19.15202037	31.50559394	14.59201552	15.75279697	8.208008728	0	7.296007758	7.876398486	0.91200097	0	7	413.14	49.57	876.14	31.0080337524414	23.6291961669922
812	77	2010-12-01	1	3	0	5.66666650772095	36.3333320617676	18	60	3	2	207	85	0	1	0	1	1	12	1142.255269	937.178978	0.91200097	3.938199243	0.087382224	0.087382224	1	1	9.120009698	15.75279697	85.88035757	19.15202037	31.50559394	14.59201552	15.75279697	8.208008728	0	7.296007758	7.876398486	0.91200097	0	7	413.14	49.57	876.14	31.0080337524414	23.6291961669922
813	77	2010-12-01	2	3	0	28.3333339691162	30.8333339691162	0.833333313465118	60	3	2	207	85	0	1	0	1	1	12	1142.255269	937.178978	0.91200097	3.938199243	0.087382224	0.087382224	1	1	9.120009698	15.75279697	85.88035757	19.15202037	31.50559394	14.59201552	15.75279697	8.208008728	0	7.296007758	7.876398486	0.91200097	0	7	413.14	49.57	876.14	31.0080337524414	23.6291961669922
814	77	2010-12-01	3	3	0	45	15	0	60	3	2	207	85	0	1	0	1	1	12	1142.255269	937.178978	0.91200097	3.938199243	0.087382224	0.087382224	1	1	9.120009698	15.75279697	85.88035757	19.15202037	31.50559394	14.59201552	15.75279697	8.208008728	0	7.296007758	7.876398486	0.91200097	0	7	413.14	49.57	876.14	31.0080337524414	23.6291961669922
815	77	2010-12-01	4	3	0	44	16	0	60	3	2	207	85	0	1	0	1	1	12	1142.255269	937.178978	0.91200097	3.938199243	0.087382224	0.087382224	1	1	9.120009698	15.75279697	85.88035757	19.15202037	31.50559394	14.59201552	15.75279697	8.208008728	0	7.296007758	7.876398486	0.91200097	0	7	413.14	49.57	876.14	31.0080337524414	23.6291961669922
816	77	2010-12-02	0	4	0	5	45	0	50	1	2	207	85	0	1	0	1	1	12	1142.255269	937.178978	0.91200097	3.938199243	0.087382224	0.087382224	1	1	9.120009698	15.75279697	85.88035757	19.15202037	31.50559394	14.59201552	15.75279697	8.208008728	0	7.296007758	7.876398486	0.91200097	0	7	413.14	49.57	876.14	31.0080337524414	23.6291961669922
817	77	2010-12-02	1	4	0	10.6666669845581	40.6666679382324	8.66666698455811	60	3	2	207	85	0	1	0	1	1	12	1142.255269	937.178978	0.91200097	3.938199243	0.087382224	0.087382224	1	1	9.120009698	15.75279697	85.88035757	19.15202037	31.50559394	14.59201552	15.75279697	8.208008728	0	7.296007758	7.876398486	0.91200097	0	7	413.14	49.57	876.14	31.0080337524414	23.6291961669922
818	77	2010-12-02	2	4	0	35	24	1	60	3	2	207	85	0	1	0	1	1	12	1142.255269	937.178978	0.91200097	3.938199243	0.087382224	0.087382224	1	1	9.120009698	15.75279697	85.88035757	19.15202037	31.50559394	14.59201552	15.75279697	8.208008728	0	7.296007758	7.876398486	0.91200097	0	7	413.14	49.57	876.14	31.0080337524414	23.6291961669922
819	77	2010-12-02	3	4	0	13.3333330154419	45.6666679382324	1	60	3	2	207	85	0	1	0	1	1	12	1142.255269	937.178978	0.91200097	3.938199243	0.087382224	0.087382224	1	1	9.120009698	15.75279697	85.88035757	19.15202037	31.50559394	14.59201552	15.75279697	8.208008728	0	7.296007758	7.876398486	0.91200097	0	7	413.14	49.57	876.14	31.0080337524414	23.6291961669922
820	77	2010-12-02	4	4	0	43	16	1	60	3	2	207	85	0	1	0	1	1	12	1142.255269	937.178978	0.91200097	3.938199243	0.087382224	0.087382224	1	1	9.120009698	15.75279697	85.88035757	19.15202037	31.50559394	14.59201552	15.75279697	8.208008728	0	7.296007758	7.876398486	0.91200097	0	7	413.14	49.57	876.14	31.0080337524414	23.6291961669922
821	77	2010-12-03	4	5	0	46.3333320617676	13.6666669845581	0	60	3	2	207	85	0	1	0	1	1	12	1142.255269	937.178978	0.91200097	3.938199243	0.087382224	0.087382224	1	1	9.120009698	15.75279697	85.88035757	19.15202037	31.50559394	14.59201552	15.75279697	8.208008728	0	7.296007758	7.876398486	0.91200097	0	7	413.14	49.57	876.14	31.0080337524414	23.6291961669922
822	77	2010-12-05	0	0	1	34	26	0	60	1	2	207	85	0	1	0	1	1	12	1142.255269	937.178978	0.91200097	3.938199243	0.087382224	0.087382224	1	1	9.120009698	15.75279697	85.88035757	19.15202037	31.50559394	14.59201552	15.75279697	8.208008728	0	7.296007758	7.876398486	0.91200097	0	7	413.14	49.57	876.14	31.0080337524414	23.6291961669922
823	77	2010-12-05	1	0	1	15.3333330154419	42.3333320617676	2.33333325386047	60	3	2	207	85	0	1	0	1	1	12	1142.255269	937.178978	0.91200097	3.938199243	0.087382224	0.087382224	1	1	9.120009698	15.75279697	85.88035757	19.15202037	31.50559394	14.59201552	15.75279697	8.208008728	0	7.296007758	7.876398486	0.91200097	0	7	413.14	49.57	876.14	31.0080337524414	23.6291961669922
824	77	2010-12-05	2	0	1	55	4	1	60	1	2	207	85	0	1	0	1	1	12	1142.255269	937.178978	0.91200097	3.938199243	0.087382224	0.087382224	1	1	9.120009698	15.75279697	85.88035757	19.15202037	31.50559394	14.59201552	15.75279697	8.208008728	0	7.296007758	7.876398486	0.91200097	0	7	413.14	49.57	876.14	31.0080337524414	23.6291961669922
825	77	2010-12-06	0	1	0	8	44	1	53	1	2	207	85	0	1	0	1	1	12	1142.255269	937.178978	0.91200097	3.938199243	0.087382224	0.087382224	1	1	9.120009698	15.75279697	85.88035757	19.15202037	31.50559394	14.59201552	15.75279697	8.208008728	0	7.296007758	7.876398486	0.91200097	0	7	413.14	49.57	876.14	31.0080337524414	23.6291961669922
826	77	2010-12-06	1	1	0	6.33333349227905	41.3333320617676	12.3333330154419	60	3	2	207	85	0	1	0	1	1	12	1142.255269	937.178978	0.91200097	3.938199243	0.087382224	0.087382224	1	1	9.120009698	15.75279697	85.88035757	19.15202037	31.50559394	14.59201552	15.75279697	8.208008728	0	7.296007758	7.876398486	0.91200097	0	7	413.14	49.57	876.14	31.0080337524414	23.6291961669922
827	77	2010-12-06	2	1	0	36.5999984741211	19.2000007629395	4.19999980926514	60	3	2	207	85	0	1	0	1	1	12	1142.255269	937.178978	0.91200097	3.938199243	0.087382224	0.087382224	1	1	9.120009698	15.75279697	85.88035757	19.15202037	31.50559394	14.59201552	15.75279697	8.208008728	0	7.296007758	7.876398486	0.91200097	0	7	413.14	49.57	876.14	31.0080337524414	23.6291961669922
828	77	2010-12-06	3	1	0	10	38.3333320617676	11.6666669845581	60	3	2	207	85	0	1	0	1	1	12	1142.255269	937.178978	0.91200097	3.938199243	0.087382224	0.087382224	1	1	9.120009698	15.75279697	85.88035757	19.15202037	31.50559394	14.59201552	15.75279697	8.208008728	0	7.296007758	7.876398486	0.91200097	0	7	413.14	49.57	876.14	31.0080337524414	23.6291961669922
829	77	2010-12-06	4	1	0	49.3333320617676	10.6666669845581	0	60	3	2	207	85	0	1	0	1	1	12	1142.255269	937.178978	0.91200097	3.938199243	0.087382224	0.087382224	1	1	9.120009698	15.75279697	85.88035757	19.15202037	31.50559394	14.59201552	15.75279697	8.208008728	0	7.296007758	7.876398486	0.91200097	0	7	413.14	49.57	876.14	31.0080337524414	23.6291961669922
830	77	2010-12-07	0	2	0	3.5	31.5	2	37	2	2	207	85	0	1	0	1	1	12	1142.255269	937.178978	0.91200097	3.938199243	0.087382224	0.087382224	1	1	9.120009698	15.75279697	85.88035757	19.15202037	31.50559394	14.59201552	15.75279697	8.208008728	0	7.296007758	7.876398486	0.91200097	0	7	413.14	49.57	876.14	31.0080337524414	23.6291961669922
831	77	2010-12-07	1	2	0	16.6666660308838	38	5.33333349227905	60	3	2	207	85	0	1	0	1	1	12	1142.255269	937.178978	0.91200097	3.938199243	0.087382224	0.087382224	1	1	9.120009698	15.75279697	85.88035757	19.15202037	31.50559394	14.59201552	15.75279697	8.208008728	0	7.296007758	7.876398486	0.91200097	0	7	413.14	49.57	876.14	31.0080337524414	23.6291961669922
832	77	2010-12-07	2	2	0	31.6666660308838	26.6666660308838	1.66666662693024	60	3	2	207	85	0	1	0	1	1	12	1142.255269	937.178978	0.91200097	3.938199243	0.087382224	0.087382224	1	1	9.120009698	15.75279697	85.88035757	19.15202037	31.50559394	14.59201552	15.75279697	8.208008728	0	7.296007758	7.876398486	0.91200097	0	7	413.14	49.57	876.14	31.0080337524414	23.6291961669922
833	77	2010-12-07	3	2	0	16.7999992370605	38.2000007629395	5	60	3	2	207	85	0	1	0	1	1	12	1142.255269	937.178978	0.91200097	3.938199243	0.087382224	0.087382224	1	1	9.120009698	15.75279697	85.88035757	19.15202037	31.50559394	14.59201552	15.75279697	8.208008728	0	7.296007758	7.876398486	0.91200097	0	7	413.14	49.57	876.14	31.0080337524414	23.6291961669922
834	77	2010-12-07	4	2	0	49	9.66666698455811	1.33333337306976	60	3	2	207	85	0	1	0	1	1	12	1142.255269	937.178978	0.91200097	3.938199243	0.087382224	0.087382224	1	1	9.120009698	15.75279697	85.88035757	19.15202037	31.50559394	14.59201552	15.75279697	8.208008728	0	7.296007758	7.876398486	0.91200097	0	7	413.14	49.57	876.14	31.0080337524414	23.6291961669922
835	77	2010-12-08	0	3	0	10	35	0	45	1	2	207	85	0	1	0	1	1	12	1142.255269	937.178978	0.91200097	3.938199243	0.087382224	0.087382224	1	1	9.120009698	15.75279697	85.88035757	19.15202037	31.50559394	14.59201552	15.75279697	8.208008728	0	7.296007758	7.876398486	0.91200097	0	7	413.14	49.57	876.14	31.0080337524414	23.6291961669922
836	77	2010-12-08	1	3	0	23	26.3333339691162	9	58.3333320617676	3	2	207	85	0	1	0	1	1	12	1142.255269	937.178978	0.91200097	3.938199243	0.087382224	0.087382224	1	1	9.120009698	15.75279697	85.88035757	19.15202037	31.50559394	14.59201552	15.75279697	8.208008728	0	7.296007758	7.876398486	0.91200097	0	7	413.14	49.57	876.14	31.0080337524414	23.6291961669922
837	77	2010-12-08	2	3	0	16	20.5	6	42.5	2	2	207	85	0	1	0	1	1	12	1142.255269	937.178978	0.91200097	3.938199243	0.087382224	0.087382224	1	1	9.120009698	15.75279697	85.88035757	19.15202037	31.50559394	14.59201552	15.75279697	8.208008728	0	7.296007758	7.876398486	0.91200097	0	7	413.14	49.57	876.14	31.0080337524414	23.6291961669922
838	77	2010-12-08	3	3	0	19.5	37.5	3	60	3	2	207	85	0	1	0	1	1	12	1142.255269	937.178978	0.91200097	3.938199243	0.087382224	0.087382224	1	1	9.120009698	15.75279697	85.88035757	19.15202037	31.50559394	14.59201552	15.75279697	8.208008728	0	7.296007758	7.876398486	0.91200097	0	7	413.14	49.57	876.14	31.0080337524414	23.6291961669922
839	77	2010-12-08	4	3	0	39.5	20.1666660308838	0.333333343267441	60	3	2	207	85	0	1	0	1	1	12	1142.255269	937.178978	0.91200097	3.938199243	0.087382224	0.087382224	1	1	9.120009698	15.75279697	85.88035757	19.15202037	31.50559394	14.59201552	15.75279697	8.208008728	0	7.296007758	7.876398486	0.91200097	0	7	413.14	49.57	876.14	31.0080337524414	23.6291961669922
840	78	2010-12-03	0	5	0	27	31	2	60	1	2	207	69	1	1	0	1	1	11	948.8338653	855.9636594	0.688372768	0	0.087382224	0	1	0	2.753491072	0	872.107512	15.83257367	20.84816944	5.506982145	10.42408472	2.753491072	3.474694907	4.130236609	10.42408472	0.688372768	0	7	367.86	51.71	961.29	13.0790824890137	24.3228645324707
841	78	2010-12-03	1	5	0	23.6666660308838	35	1.33333337306976	60	3	2	207	69	1	1	0	1	1	11	948.8338653	855.9636594	0.688372768	0	0.087382224	0	1	0	2.753491072	0	872.107512	15.83257367	20.84816944	5.506982145	10.42408472	2.753491072	3.474694907	4.130236609	10.42408472	0.688372768	0	7	367.86	51.71	961.29	13.0790824890137	24.3228645324707
842	78	2010-12-03	2	5	0	15.6666669845581	30.6666660308838	13.6666669845581	60	3	2	207	69	1	1	0	1	1	11	948.8338653	855.9636594	0.688372768	0	0.087382224	0	1	0	2.753491072	0	872.107512	15.83257367	20.84816944	5.506982145	10.42408472	2.753491072	3.474694907	4.130236609	10.42408472	0.688372768	0	7	367.86	51.71	961.29	13.0790824890137	24.3228645324707
843	78	2010-12-03	3	5	0	18.3333339691162	36	5.66666650772095	60	3	2	207	69	1	1	0	1	1	11	948.8338653	855.9636594	0.688372768	0	0.087382224	0	1	0	2.753491072	0	872.107512	15.83257367	20.84816944	5.506982145	10.42408472	2.753491072	3.474694907	4.130236609	10.42408472	0.688372768	0	7	367.86	51.71	961.29	13.0790824890137	24.3228645324707
844	78	2010-12-03	4	5	0	26	34	0	60	3	2	207	69	1	1	0	1	1	11	948.8338653	855.9636594	0.688372768	0	0.087382224	0	1	0	2.753491072	0	872.107512	15.83257367	20.84816944	5.506982145	10.42408472	2.753491072	3.474694907	4.130236609	10.42408472	0.688372768	0	7	367.86	51.71	961.29	13.0790824890137	24.3228645324707
845	78	2010-12-04	0	6	1	19.75	26.5	0.25	46.5	3	2	207	69	1	1	0	1	1	11	948.8338653	855.9636594	0.688372768	0	0.087382224	0	1	0	2.753491072	0	872.107512	15.83257367	20.84816944	5.506982145	10.42408472	2.753491072	3.474694907	4.130236609	10.42408472	0.688372768	0	7	367.86	51.71	961.29	13.0790824890137	24.3228645324707
846	78	2010-12-04	1	6	1	23.75	35.75	0.5	60	3	2	207	69	1	1	0	1	1	11	948.8338653	855.9636594	0.688372768	0	0.087382224	0	1	0	2.753491072	0	872.107512	15.83257367	20.84816944	5.506982145	10.42408472	2.753491072	3.474694907	4.130236609	10.42408472	0.688372768	0	7	367.86	51.71	961.29	13.0790824890137	24.3228645324707
847	78	2010-12-04	2	6	1	23.3333339691162	36	0.666666686534882	60	3	2	207	69	1	1	0	1	1	11	948.8338653	855.9636594	0.688372768	0	0.087382224	0	1	0	2.753491072	0	872.107512	15.83257367	20.84816944	5.506982145	10.42408472	2.753491072	3.474694907	4.130236609	10.42408472	0.688372768	0	7	367.86	51.71	961.29	13.0790824890137	24.3228645324707
848	78	2010-12-04	3	6	1	23	36.3333320617676	0.666666686534882	60	3	2	207	69	1	1	0	1	1	11	948.8338653	855.9636594	0.688372768	0	0.087382224	0	1	0	2.753491072	0	872.107512	15.83257367	20.84816944	5.506982145	10.42408472	2.753491072	3.474694907	4.130236609	10.42408472	0.688372768	0	7	367.86	51.71	961.29	13.0790824890137	24.3228645324707
849	78	2010-12-04	4	6	1	21.3333339691162	38	0.666666686534882	60	3	2	207	69	1	1	0	1	1	11	948.8338653	855.9636594	0.688372768	0	0.087382224	0	1	0	2.753491072	0	872.107512	15.83257367	20.84816944	5.506982145	10.42408472	2.753491072	3.474694907	4.130236609	10.42408472	0.688372768	0	7	367.86	51.71	961.29	13.0790824890137	24.3228645324707
850	78	2010-12-05	0	0	1	17.5	26.5	1.5	45.5	2	2	207	69	1	1	0	1	1	11	948.8338653	855.9636594	0.688372768	0	0.087382224	0	1	0	2.753491072	0	872.107512	15.83257367	20.84816944	5.506982145	10.42408472	2.753491072	3.474694907	4.130236609	10.42408472	0.688372768	0	7	367.86	51.71	961.29	13.0790824890137	24.3228645324707
851	78	2010-12-05	1	0	1	17.6000003814697	39.7999992370605	2.59999990463257	60	3	2	207	69	1	1	0	1	1	11	948.8338653	855.9636594	0.688372768	0	0.087382224	0	1	0	2.753491072	0	872.107512	15.83257367	20.84816944	5.506982145	10.42408472	2.753491072	3.474694907	4.130236609	10.42408472	0.688372768	0	7	367.86	51.71	961.29	13.0790824890137	24.3228645324707
852	78	2010-12-05	2	0	1	26	34	0	60	3	2	207	69	1	1	0	1	1	11	948.8338653	855.9636594	0.688372768	0	0.087382224	0	1	0	2.753491072	0	872.107512	15.83257367	20.84816944	5.506982145	10.42408472	2.753491072	3.474694907	4.130236609	10.42408472	0.688372768	0	7	367.86	51.71	961.29	13.0790824890137	24.3228645324707
853	78	2010-12-05	3	0	1	24	34.3333320617676	1.66666662693024	60	3	2	207	69	1	1	0	1	1	11	948.8338653	855.9636594	0.688372768	0	0.087382224	0	1	0	2.753491072	0	872.107512	15.83257367	20.84816944	5.506982145	10.42408472	2.753491072	3.474694907	4.130236609	10.42408472	0.688372768	0	7	367.86	51.71	961.29	13.0790824890137	24.3228645324707
854	78	2010-12-05	4	0	1	22	37	1	60	3	2	207	69	1	1	0	1	1	11	948.8338653	855.9636594	0.688372768	0	0.087382224	0	1	0	2.753491072	0	872.107512	15.83257367	20.84816944	5.506982145	10.42408472	2.753491072	3.474694907	4.130236609	10.42408472	0.688372768	0	7	367.86	51.71	961.29	13.0790824890137	24.3228645324707
855	78	2010-12-06	0	1	0	27	5.5	0.5	33	2	2	207	69	1	1	0	1	1	11	948.8338653	855.9636594	0.688372768	0	0.087382224	0	1	0	2.753491072	0	872.107512	15.83257367	20.84816944	5.506982145	10.42408472	2.753491072	3.474694907	4.130236609	10.42408472	0.688372768	0	7	367.86	51.71	961.29	13.0790824890137	24.3228645324707
856	78	2010-12-06	1	1	0	24.3333339691162	34.3333320617676	1.33333337306976	60	3	2	207	69	1	1	0	1	1	11	948.8338653	855.9636594	0.688372768	0	0.087382224	0	1	0	2.753491072	0	872.107512	15.83257367	20.84816944	5.506982145	10.42408472	2.753491072	3.474694907	4.130236609	10.42408472	0.688372768	0	7	367.86	51.71	961.29	13.0790824890137	24.3228645324707
857	78	2010-12-06	2	1	0	12.25	33.75	14	60	3	2	207	69	1	1	0	1	1	11	948.8338653	855.9636594	0.688372768	0	0.087382224	0	1	0	2.753491072	0	872.107512	15.83257367	20.84816944	5.506982145	10.42408472	2.753491072	3.474694907	4.130236609	10.42408472	0.688372768	0	7	367.86	51.71	961.29	13.0790824890137	24.3228645324707
858	78	2010-12-06	3	1	0	18.3333339691162	35.3333320617676	6.33333349227905	60	3	2	207	69	1	1	0	1	1	11	948.8338653	855.9636594	0.688372768	0	0.087382224	0	1	0	2.753491072	0	872.107512	15.83257367	20.84816944	5.506982145	10.42408472	2.753491072	3.474694907	4.130236609	10.42408472	0.688372768	0	7	367.86	51.71	961.29	13.0790824890137	24.3228645324707
859	78	2010-12-06	4	1	0	20	35	5	60	3	2	207	69	1	1	0	1	1	11	948.8338653	855.9636594	0.688372768	0	0.087382224	0	1	0	2.753491072	0	872.107512	15.83257367	20.84816944	5.506982145	10.42408472	2.753491072	3.474694907	4.130236609	10.42408472	0.688372768	0	7	367.86	51.71	961.29	13.0790824890137	24.3228645324707
860	78	2010-12-07	1	2	0	9.66666698455811	36	4	49.6666679382324	3	2	207	69	1	1	0	1	1	11	948.8338653	855.9636594	0.688372768	0	0.087382224	0	1	0	2.753491072	0	872.107512	15.83257367	20.84816944	5.506982145	10.42408472	2.753491072	3.474694907	4.130236609	10.42408472	0.688372768	0	7	367.86	51.71	961.29	13.0790824890137	24.3228645324707
861	78	2010-12-07	2	2	0	29.3999996185303	29.6000003814697	1	60	3	2	207	69	1	1	0	1	1	11	948.8338653	855.9636594	0.688372768	0	0.087382224	0	1	0	2.753491072	0	872.107512	15.83257367	20.84816944	5.506982145	10.42408472	2.753491072	3.474694907	4.130236609	10.42408472	0.688372768	0	7	367.86	51.71	961.29	13.0790824890137	24.3228645324707
862	78	2010-12-07	3	2	0	7.59999990463257	40.5999984741211	11.8000001907349	60	3	2	207	69	1	1	0	1	1	11	948.8338653	855.9636594	0.688372768	0	0.087382224	0	1	0	2.753491072	0	872.107512	15.83257367	20.84816944	5.506982145	10.42408472	2.753491072	3.474694907	4.130236609	10.42408472	0.688372768	0	7	367.86	51.71	961.29	13.0790824890137	24.3228645324707
863	78	2010-12-07	4	2	0	21.6666660308838	34.6666679382324	3.66666674613953	60	3	2	207	69	1	1	0	1	1	11	948.8338653	855.9636594	0.688372768	0	0.087382224	0	1	0	2.753491072	0	872.107512	15.83257367	20.84816944	5.506982145	10.42408472	2.753491072	3.474694907	4.130236609	10.42408472	0.688372768	0	7	367.86	51.71	961.29	13.0790824890137	24.3228645324707
864	78	2010-12-08	0	3	0	23.5	29.5	0.5	53.5	2	2	207	69	1	1	0	1	1	11	948.8338653	855.9636594	0.688372768	0	0.087382224	0	1	0	2.753491072	0	872.107512	15.83257367	20.84816944	5.506982145	10.42408472	2.753491072	3.474694907	4.130236609	10.42408472	0.688372768	0	7	367.86	51.71	961.29	13.0790824890137	24.3228645324707
865	78	2010-12-08	1	3	0	12.6666669845581	39.3333320617676	8	60	3	2	207	69	1	1	0	1	1	11	948.8338653	855.9636594	0.688372768	0	0.087382224	0	1	0	2.753491072	0	872.107512	15.83257367	20.84816944	5.506982145	10.42408472	2.753491072	3.474694907	4.130236609	10.42408472	0.688372768	0	7	367.86	51.71	961.29	13.0790824890137	24.3228645324707
866	78	2010-12-08	2	3	0	23.6666660308838	34.6666679382324	1.66666662693024	60	3	2	207	69	1	1	0	1	1	11	948.8338653	855.9636594	0.688372768	0	0.087382224	0	1	0	2.753491072	0	872.107512	15.83257367	20.84816944	5.506982145	10.42408472	2.753491072	3.474694907	4.130236609	10.42408472	0.688372768	0	7	367.86	51.71	961.29	13.0790824890137	24.3228645324707
867	78	2010-12-08	3	3	0	7.75	48.25	4	60	3	2	207	69	1	1	0	1	1	11	948.8338653	855.9636594	0.688372768	0	0.087382224	0	1	0	2.753491072	0	872.107512	15.83257367	20.84816944	5.506982145	10.42408472	2.753491072	3.474694907	4.130236609	10.42408472	0.688372768	0	7	367.86	51.71	961.29	13.0790824890137	24.3228645324707
868	78	2010-12-08	4	3	0	14.6666669845581	42.5	2.83333325386047	60	3	2	207	69	1	1	0	1	1	11	948.8338653	855.9636594	0.688372768	0	0.087382224	0	1	0	2.753491072	0	872.107512	15.83257367	20.84816944	5.506982145	10.42408472	2.753491072	3.474694907	4.130236609	10.42408472	0.688372768	0	7	367.86	51.71	961.29	13.0790824890137	24.3228645324707
869	91	2010-12-08	0	3	0	27	31	2	60	1	2	208	80	1	1	0	1	1	8	1010.290313	1074.18078	6.013852546	0	1.441879636	0	4	0	6.872974338	12.67107482	80.21009103	28.35101914	46.46060766	4.295608961	4.223691605	3.436487169	8.44738321	10.30946151	21.11845803	0	0	7	424.43	38.86	872.71	18.0415573120117	33.7895317077637
870	91	2011-02-02	0	3	0	22.5	27.5	0.5	50.5	2	2	208	80	1	1	0	1	1	8	1010.290313	1074.18078	6.013852546	0	1.441879636	0	4	0	6.872974338	12.67107482	80.21009103	28.35101914	46.46060766	4.295608961	4.223691605	3.436487169	8.44738321	10.30946151	21.11845803	0	0	7	424.43	38.86	872.71	18.0415573120117	33.7895317077637
871	91	2011-02-02	1	3	0	25.6000003814697	33.5999984741211	0.800000011920929	60	3	2	208	80	1	1	0	1	1	8	1010.290313	1074.18078	6.013852546	0	1.441879636	0	4	0	6.872974338	12.67107482	80.21009103	28.35101914	46.46060766	4.295608961	4.223691605	3.436487169	8.44738321	10.30946151	21.11845803	0	0	7	424.43	38.86	872.71	18.0415573120117	33.7895317077637
872	91	2011-02-02	2	3	0	15.6666669845581	30.6666660308838	13.6666669845581	60	3	2	208	80	1	1	0	1	1	8	1010.290313	1074.18078	6.013852546	0	1.441879636	0	4	0	6.872974338	12.67107482	80.21009103	28.35101914	46.46060766	4.295608961	4.223691605	3.436487169	8.44738321	10.30946151	21.11845803	0	0	7	424.43	38.86	872.71	18.0415573120117	33.7895317077637
873	91	2011-02-02	3	3	0	18.3333339691162	36	5.66666650772095	60	3	2	208	80	1	1	0	1	1	8	1010.290313	1074.18078	6.013852546	0	1.441879636	0	4	0	6.872974338	12.67107482	80.21009103	28.35101914	46.46060766	4.295608961	4.223691605	3.436487169	8.44738321	10.30946151	21.11845803	0	0	7	424.43	38.86	872.71	18.0415573120117	33.7895317077637
874	91	2011-02-02	4	3	0	26	34	0	60	3	2	208	80	1	1	0	1	1	8	1010.290313	1074.18078	6.013852546	0	1.441879636	0	4	0	6.872974338	12.67107482	80.21009103	28.35101914	46.46060766	4.295608961	4.223691605	3.436487169	8.44738321	10.30946151	21.11845803	0	0	7	424.43	38.86	872.71	18.0415573120117	33.7895317077637
875	91	2011-02-03	0	4	0	17	25.5	0	42.5	2	2	208	80	1	1	0	1	1	8	1010.290313	1074.18078	6.013852546	0	1.441879636	0	4	0	6.872974338	12.67107482	80.21009103	28.35101914	46.46060766	4.295608961	4.223691605	3.436487169	8.44738321	10.30946151	21.11845803	0	0	7	424.43	38.86	872.71	18.0415573120117	33.7895317077637
876	91	2011-02-03	1	4	0	14.25	45	0.75	60	3	2	208	80	1	1	0	1	1	8	1010.290313	1074.18078	6.013852546	0	1.441879636	0	4	0	6.872974338	12.67107482	80.21009103	28.35101914	46.46060766	4.295608961	4.223691605	3.436487169	8.44738321	10.30946151	21.11845803	0	0	7	424.43	38.86	872.71	18.0415573120117	33.7895317077637
877	91	2011-02-03	2	4	0	23.3333339691162	36	0.666666686534882	60	3	2	208	80	1	1	0	1	1	8	1010.290313	1074.18078	6.013852546	0	1.441879636	0	4	0	6.872974338	12.67107482	80.21009103	28.35101914	46.46060766	4.295608961	4.223691605	3.436487169	8.44738321	10.30946151	21.11845803	0	0	7	424.43	38.86	872.71	18.0415573120117	33.7895317077637
878	91	2011-02-03	3	4	0	23	36.3333320617676	0.666666686534882	60	3	2	208	80	1	1	0	1	1	8	1010.290313	1074.18078	6.013852546	0	1.441879636	0	4	0	6.872974338	12.67107482	80.21009103	28.35101914	46.46060766	4.295608961	4.223691605	3.436487169	8.44738321	10.30946151	21.11845803	0	0	7	424.43	38.86	872.71	18.0415573120117	33.7895317077637
879	91	2011-02-03	4	4	0	21.3333339691162	38	0.666666686534882	60	3	2	208	80	1	1	0	1	1	8	1010.290313	1074.18078	6.013852546	0	1.441879636	0	4	0	6.872974338	12.67107482	80.21009103	28.35101914	46.46060766	4.295608961	4.223691605	3.436487169	8.44738321	10.30946151	21.11845803	0	0	7	424.43	38.86	872.71	18.0415573120117	33.7895317077637
880	91	2011-02-04	0	5	0	17.5	26.5	1.5	45.5	2	2	208	80	1	1	0	1	1	8	1010.290313	1074.18078	6.013852546	0	1.441879636	0	4	0	6.872974338	12.67107482	80.21009103	28.35101914	46.46060766	4.295608961	4.223691605	3.436487169	8.44738321	10.30946151	21.11845803	0	0	7	424.43	38.86	872.71	18.0415573120117	33.7895317077637
881	91	2011-02-04	1	5	0	23	33	4	60	3	2	208	80	1	1	0	1	1	8	1010.290313	1074.18078	6.013852546	0	1.441879636	0	4	0	6.872974338	12.67107482	80.21009103	28.35101914	46.46060766	4.295608961	4.223691605	3.436487169	8.44738321	10.30946151	21.11845803	0	0	7	424.43	38.86	872.71	18.0415573120117	33.7895317077637
882	91	2011-02-04	2	5	0	24.5	35	0.5	60	3	2	208	80	1	1	0	1	1	8	1010.290313	1074.18078	6.013852546	0	1.441879636	0	4	0	6.872974338	12.67107482	80.21009103	28.35101914	46.46060766	4.295608961	4.223691605	3.436487169	8.44738321	10.30946151	21.11845803	0	0	7	424.43	38.86	872.71	18.0415573120117	33.7895317077637
883	91	2011-02-04	3	5	0	24	34.3333320617676	1.66666662693024	60	3	2	208	80	1	1	0	1	1	8	1010.290313	1074.18078	6.013852546	0	1.441879636	0	4	0	6.872974338	12.67107482	80.21009103	28.35101914	46.46060766	4.295608961	4.223691605	3.436487169	8.44738321	10.30946151	21.11845803	0	0	7	424.43	38.86	872.71	18.0415573120117	33.7895317077637
884	91	2011-02-04	4	5	0	22	37	1	60	3	2	208	80	1	1	0	1	1	8	1010.290313	1074.18078	6.013852546	0	1.441879636	0	4	0	6.872974338	12.67107482	80.21009103	28.35101914	46.46060766	4.295608961	4.223691605	3.436487169	8.44738321	10.30946151	21.11845803	0	0	7	424.43	38.86	872.71	18.0415573120117	33.7895317077637
885	91	2011-02-05	0	6	1	27	5.5	0.5	33	2	2	208	80	1	1	0	1	1	8	1010.290313	1074.18078	6.013852546	0	1.441879636	0	4	0	6.872974338	12.67107482	80.21009103	28.35101914	46.46060766	4.295608961	4.223691605	3.436487169	8.44738321	10.30946151	21.11845803	0	0	7	424.43	38.86	872.71	18.0415573120117	33.7895317077637
886	91	2011-02-05	1	6	1	24.3333339691162	34.3333320617676	1.33333337306976	60	3	2	208	80	1	1	0	1	1	8	1010.290313	1074.18078	6.013852546	0	1.441879636	0	4	0	6.872974338	12.67107482	80.21009103	28.35101914	46.46060766	4.295608961	4.223691605	3.436487169	8.44738321	10.30946151	21.11845803	0	0	7	424.43	38.86	872.71	18.0415573120117	33.7895317077637
887	91	2011-02-05	2	6	1	21.3999996185303	27.6000003814697	11	60	3	2	208	80	1	1	0	1	1	8	1010.290313	1074.18078	6.013852546	0	1.441879636	0	4	0	6.872974338	12.67107482	80.21009103	28.35101914	46.46060766	4.295608961	4.223691605	3.436487169	8.44738321	10.30946151	21.11845803	0	0	7	424.43	38.86	872.71	18.0415573120117	33.7895317077637
888	91	2011-02-05	3	6	1	18.3333339691162	35.3333320617676	6.33333349227905	60	3	2	208	80	1	1	0	1	1	8	1010.290313	1074.18078	6.013852546	0	1.441879636	0	4	0	6.872974338	12.67107482	80.21009103	28.35101914	46.46060766	4.295608961	4.223691605	3.436487169	8.44738321	10.30946151	21.11845803	0	0	7	424.43	38.86	872.71	18.0415573120117	33.7895317077637
889	91	2011-02-05	4	6	1	20	35	5	60	3	2	208	80	1	1	0	1	1	8	1010.290313	1074.18078	6.013852546	0	1.441879636	0	4	0	6.872974338	12.67107482	80.21009103	28.35101914	46.46060766	4.295608961	4.223691605	3.436487169	8.44738321	10.30946151	21.11845803	0	0	7	424.43	38.86	872.71	18.0415573120117	33.7895317077637
890	91	2011-02-06	1	0	1	9.66666698455811	36	4	49.6666679382324	3	2	208	80	1	1	0	1	1	8	1010.290313	1074.18078	6.013852546	0	1.441879636	0	4	0	6.872974338	12.67107482	80.21009103	28.35101914	46.46060766	4.295608961	4.223691605	3.436487169	8.44738321	10.30946151	21.11845803	0	0	7	424.43	38.86	872.71	18.0415573120117	33.7895317077637
891	91	2011-02-06	2	0	1	23	35.6666679382324	1.33333337306976	60	3	2	208	80	1	1	0	1	1	8	1010.290313	1074.18078	6.013852546	0	1.441879636	0	4	0	6.872974338	12.67107482	80.21009103	28.35101914	46.46060766	4.295608961	4.223691605	3.436487169	8.44738321	10.30946151	21.11845803	0	0	7	424.43	38.86	872.71	18.0415573120117	33.7895317077637
892	91	2011-02-06	3	0	1	7.83333349227905	41.5	10.6666669845581	60	3	2	208	80	1	1	0	1	1	8	1010.290313	1074.18078	6.013852546	0	1.441879636	0	4	0	6.872974338	12.67107482	80.21009103	28.35101914	46.46060766	4.295608961	4.223691605	3.436487169	8.44738321	10.30946151	21.11845803	0	0	7	424.43	38.86	872.71	18.0415573120117	33.7895317077637
893	91	2011-02-06	4	0	1	18	39.5999984741211	2.40000009536743	60	3	2	208	80	1	1	0	1	1	8	1010.290313	1074.18078	6.013852546	0	1.441879636	0	4	0	6.872974338	12.67107482	80.21009103	28.35101914	46.46060766	4.295608961	4.223691605	3.436487169	8.44738321	10.30946151	21.11845803	0	0	7	424.43	38.86	872.71	18.0415573120117	33.7895317077637
894	91	2011-02-07	0	1	0	23.5	29.5	0.5	53.5	2	2	208	80	1	1	0	1	1	8	1010.290313	1074.18078	6.013852546	0	1.441879636	0	4	0	6.872974338	12.67107482	80.21009103	28.35101914	46.46060766	4.295608961	4.223691605	3.436487169	8.44738321	10.30946151	21.11845803	0	0	7	424.43	38.86	872.71	18.0415573120117	33.7895317077637
895	91	2011-02-07	1	1	0	12.6666669845581	39.3333320617676	8	60	3	2	208	80	1	1	0	1	1	8	1010.290313	1074.18078	6.013852546	0	1.441879636	0	4	0	6.872974338	12.67107482	80.21009103	28.35101914	46.46060766	4.295608961	4.223691605	3.436487169	8.44738321	10.30946151	21.11845803	0	0	7	424.43	38.86	872.71	18.0415573120117	33.7895317077637
896	91	2011-02-07	2	1	0	23.6666660308838	34.6666679382324	1.66666662693024	60	3	2	208	80	1	1	0	1	1	8	1010.290313	1074.18078	6.013852546	0	1.441879636	0	4	0	6.872974338	12.67107482	80.21009103	28.35101914	46.46060766	4.295608961	4.223691605	3.436487169	8.44738321	10.30946151	21.11845803	0	0	7	424.43	38.86	872.71	18.0415573120117	33.7895317077637
897	91	2011-02-07	3	1	0	7.33333349227905	49	3.66666674613953	60	3	2	208	80	1	1	0	1	1	8	1010.290313	1074.18078	6.013852546	0	1.441879636	0	4	0	6.872974338	12.67107482	80.21009103	28.35101914	46.46060766	4.295608961	4.223691605	3.436487169	8.44738321	10.30946151	21.11845803	0	0	7	424.43	38.86	872.71	18.0415573120117	33.7895317077637
898	91	2011-02-07	4	1	0	15.75	40.25	4	60	3	2	208	80	1	1	0	1	1	8	1010.290313	1074.18078	6.013852546	0	1.441879636	0	4	0	6.872974338	12.67107482	80.21009103	28.35101914	46.46060766	4.295608961	4.223691605	3.436487169	8.44738321	10.30946151	21.11845803	0	0	7	424.43	38.86	872.71	18.0415573120117	33.7895317077637
899	95	2010-12-29	2	3	0	28.5	30	1.5	60	2	2	208	67	1	1	0	1	1	11	869.5374285	1006.186545	3.743157906	0	0.912181185	0	2	0	6.550526335	10.05063835	210.3506739	27.13789482	40.2025534	4.678947382	0	3.743157906	10.05063835	8.422105288	25.12659588	0	0	7	419	63	874.14	16.8442096710205	35.1772346496582
900	95	2010-12-29	3	3	0	29	28.6666660308838	2.33333325386047	60	3	2	208	67	1	1	0	1	1	11	869.5374285	1006.186545	3.743157906	0	0.912181185	0	2	0	6.550526335	10.05063835	210.3506739	27.13789482	40.2025534	4.678947382	0	3.743157906	10.05063835	8.422105288	25.12659588	0	0	7	419	63	874.14	16.8442096710205	35.1772346496582
901	95	2010-12-29	4	3	0	36.3333320617676	23.3333339691162	0.333333343267441	60	3	2	208	67	1	1	0	1	1	11	869.5374285	1006.186545	3.743157906	0	0.912181185	0	2	0	6.550526335	10.05063835	210.3506739	27.13789482	40.2025534	4.678947382	0	3.743157906	10.05063835	8.422105288	25.12659588	0	0	7	419	63	874.14	16.8442096710205	35.1772346496582
902	95	2011-01-01	1	6	1	23	28	7.66666650772095	58.6666679382324	3	2	208	67	1	1	0	1	1	11	869.5374285	1006.186545	3.743157906	0	0.912181185	0	2	0	6.550526335	10.05063835	210.3506739	27.13789482	40.2025534	4.678947382	0	3.743157906	10.05063835	8.422105288	25.12659588	0	0	7	419	63	874.14	16.8442096710205	35.1772346496582
903	95	2011-01-01	2	6	1	21	28.3999996185303	10.6000003814697	60	3	2	208	67	1	1	0	1	1	11	869.5374285	1006.186545	3.743157906	0	0.912181185	0	2	0	6.550526335	10.05063835	210.3506739	27.13789482	40.2025534	4.678947382	0	3.743157906	10.05063835	8.422105288	25.12659588	0	0	7	419	63	874.14	16.8442096710205	35.1772346496582
904	95	2011-01-01	3	6	1	16	35.4000015258789	8.60000038146973	60	3	2	208	67	1	1	0	1	1	11	869.5374285	1006.186545	3.743157906	0	0.912181185	0	2	0	6.550526335	10.05063835	210.3506739	27.13789482	40.2025534	4.678947382	0	3.743157906	10.05063835	8.422105288	25.12659588	0	0	7	419	63	874.14	16.8442096710205	35.1772346496582
905	95	2011-01-01	4	6	1	27.6666660308838	29	3.33333325386047	60	3	2	208	67	1	1	0	1	1	11	869.5374285	1006.186545	3.743157906	0	0.912181185	0	2	0	6.550526335	10.05063835	210.3506739	27.13789482	40.2025534	4.678947382	0	3.743157906	10.05063835	8.422105288	25.12659588	0	0	7	419	63	874.14	16.8442096710205	35.1772346496582
906	95	2011-01-02	0	0	1	1	15	2	18	1	2	208	67	1	1	0	1	1	11	869.5374285	1006.186545	3.743157906	0	0.912181185	0	2	0	6.550526335	10.05063835	210.3506739	27.13789482	40.2025534	4.678947382	0	3.743157906	10.05063835	8.422105288	25.12659588	0	0	7	419	63	874.14	16.8442096710205	35.1772346496582
907	95	2011-01-02	1	0	1	39.6666679382324	17	3.33333325386047	60	3	2	208	67	1	1	0	1	1	11	869.5374285	1006.186545	3.743157906	0	0.912181185	0	2	0	6.550526335	10.05063835	210.3506739	27.13789482	40.2025534	4.678947382	0	3.743157906	10.05063835	8.422105288	25.12659588	0	0	7	419	63	874.14	16.8442096710205	35.1772346496582
908	95	2011-01-02	2	0	1	17.3333339691162	38	4.66666650772095	60	3	2	208	67	1	1	0	1	1	11	869.5374285	1006.186545	3.743157906	0	0.912181185	0	2	0	6.550526335	10.05063835	210.3506739	27.13789482	40.2025534	4.678947382	0	3.743157906	10.05063835	8.422105288	25.12659588	0	0	7	419	63	874.14	16.8442096710205	35.1772346496582
909	95	2011-01-02	3	0	1	23.75	28.25	8	60	3	2	208	67	1	1	0	1	1	11	869.5374285	1006.186545	3.743157906	0	0.912181185	0	2	0	6.550526335	10.05063835	210.3506739	27.13789482	40.2025534	4.678947382	0	3.743157906	10.05063835	8.422105288	25.12659588	0	0	7	419	63	874.14	16.8442096710205	35.1772346496582
910	95	2011-01-02	4	0	1	40.8333320617676	18.5	0.666666686534882	60	3	2	208	67	1	1	0	1	1	11	869.5374285	1006.186545	3.743157906	0	0.912181185	0	2	0	6.550526335	10.05063835	210.3506739	27.13789482	40.2025534	4.678947382	0	3.743157906	10.05063835	8.422105288	25.12659588	0	0	7	419	63	874.14	16.8442096710205	35.1772346496582
911	95	2011-01-03	0	1	0	14	16	0.5	30.5	2	2	208	67	1	1	0	1	1	11	869.5374285	1006.186545	3.743157906	0	0.912181185	0	2	0	6.550526335	10.05063835	210.3506739	27.13789482	40.2025534	4.678947382	0	3.743157906	10.05063835	8.422105288	25.12659588	0	0	7	419	63	874.14	16.8442096710205	35.1772346496582
912	95	2011-01-03	1	1	0	34.4000015258789	23.7999992370605	1.79999995231628	60	3	2	208	67	1	1	0	1	1	11	869.5374285	1006.186545	3.743157906	0	0.912181185	0	2	0	6.550526335	10.05063835	210.3506739	27.13789482	40.2025534	4.678947382	0	3.743157906	10.05063835	8.422105288	25.12659588	0	0	7	419	63	874.14	16.8442096710205	35.1772346496582
913	95	2011-01-03	2	1	0	26.3333339691162	31.6666660308838	2	60	3	2	208	67	1	1	0	1	1	11	869.5374285	1006.186545	3.743157906	0	0.912181185	0	2	0	6.550526335	10.05063835	210.3506739	27.13789482	40.2025534	4.678947382	0	3.743157906	10.05063835	8.422105288	25.12659588	0	0	7	419	63	874.14	16.8442096710205	35.1772346496582
914	95	2011-01-03	3	1	0	15	33	12	60	3	2	208	67	1	1	0	1	1	11	869.5374285	1006.186545	3.743157906	0	0.912181185	0	2	0	6.550526335	10.05063835	210.3506739	27.13789482	40.2025534	4.678947382	0	3.743157906	10.05063835	8.422105288	25.12659588	0	0	7	419	63	874.14	16.8442096710205	35.1772346496582
915	95	2011-01-03	4	1	0	32.6666679382324	23	4.33333349227905	60	3	2	208	67	1	1	0	1	1	11	869.5374285	1006.186545	3.743157906	0	0.912181185	0	2	0	6.550526335	10.05063835	210.3506739	27.13789482	40.2025534	4.678947382	0	3.743157906	10.05063835	8.422105288	25.12659588	0	0	7	419	63	874.14	16.8442096710205	35.1772346496582
916	95	2011-01-04	0	2	0	18.5	23.5	0	42	2	2	208	67	1	1	0	1	1	11	869.5374285	1006.186545	3.743157906	0	0.912181185	0	2	0	6.550526335	10.05063835	210.3506739	27.13789482	40.2025534	4.678947382	0	3.743157906	10.05063835	8.422105288	25.12659588	0	0	7	419	63	874.14	16.8442096710205	35.1772346496582
917	95	2011-01-04	1	2	0	27.25	23.75	9	60	3	2	208	67	1	1	0	1	1	11	869.5374285	1006.186545	3.743157906	0	0.912181185	0	2	0	6.550526335	10.05063835	210.3506739	27.13789482	40.2025534	4.678947382	0	3.743157906	10.05063835	8.422105288	25.12659588	0	0	7	419	63	874.14	16.8442096710205	35.1772346496582
918	95	2011-01-04	2	2	0	29	30.5	0.5	60	3	2	208	67	1	1	0	1	1	11	869.5374285	1006.186545	3.743157906	0	0.912181185	0	2	0	6.550526335	10.05063835	210.3506739	27.13789482	40.2025534	4.678947382	0	3.743157906	10.05063835	8.422105288	25.12659588	0	0	7	419	63	874.14	16.8442096710205	35.1772346496582
919	95	2011-01-04	3	2	0	19	33	8	60	3	2	208	67	1	1	0	1	1	11	869.5374285	1006.186545	3.743157906	0	0.912181185	0	2	0	6.550526335	10.05063835	210.3506739	27.13789482	40.2025534	4.678947382	0	3.743157906	10.05063835	8.422105288	25.12659588	0	0	7	419	63	874.14	16.8442096710205	35.1772346496582
920	95	2011-01-04	4	2	0	32.3333320617676	27.3333339691162	0.333333343267441	60	3	2	208	67	1	1	0	1	1	11	869.5374285	1006.186545	3.743157906	0	0.912181185	0	2	0	6.550526335	10.05063835	210.3506739	27.13789482	40.2025534	4.678947382	0	3.743157906	10.05063835	8.422105288	25.12659588	0	0	7	419	63	874.14	16.8442096710205	35.1772346496582
921	95	2011-02-07	0	1	0	53	6	1	60	1	2	208	67	1	1	0	1	1	11	869.5374285	1006.186545	3.743157906	0	0.912181185	0	2	0	6.550526335	10.05063835	210.3506739	27.13789482	40.2025534	4.678947382	0	3.743157906	10.05063835	8.422105288	25.12659588	0	0	7	419	63	874.14	16.8442096710205	35.1772346496582
922	95	2011-02-07	1	1	0	39	18	3	60	1	2	208	67	1	1	0	1	1	11	869.5374285	1006.186545	3.743157906	0	0.912181185	0	2	0	6.550526335	10.05063835	210.3506739	27.13789482	40.2025534	4.678947382	0	3.743157906	10.05063835	8.422105288	25.12659588	0	0	7	419	63	874.14	16.8442096710205	35.1772346496582
923	95	2011-02-08	0	2	0	35	15.6666669845581	1.33333337306976	52	3	2	208	67	1	1	0	1	1	11	869.5374285	1006.186545	3.743157906	0	0.912181185	0	2	0	6.550526335	10.05063835	210.3506739	27.13789482	40.2025534	4.678947382	0	3.743157906	10.05063835	8.422105288	25.12659588	0	0	7	419	63	874.14	16.8442096710205	35.1772346496582
924	95	2011-02-08	1	2	0	22.7999992370605	33	4.19999980926514	60	3	2	208	67	1	1	0	1	1	11	869.5374285	1006.186545	3.743157906	0	0.912181185	0	2	0	6.550526335	10.05063835	210.3506739	27.13789482	40.2025534	4.678947382	0	3.743157906	10.05063835	8.422105288	25.12659588	0	0	7	419	63	874.14	16.8442096710205	35.1772346496582
925	95	2011-02-08	2	2	0	22.25	31	6.75	60	3	2	208	67	1	1	0	1	1	11	869.5374285	1006.186545	3.743157906	0	0.912181185	0	2	0	6.550526335	10.05063835	210.3506739	27.13789482	40.2025534	4.678947382	0	3.743157906	10.05063835	8.422105288	25.12659588	0	0	7	419	63	874.14	16.8442096710205	35.1772346496582
926	95	2011-02-08	3	2	0	18.3333339691162	28.3333339691162	13.3333330154419	60	3	2	208	67	1	1	0	1	1	11	869.5374285	1006.186545	3.743157906	0	0.912181185	0	2	0	6.550526335	10.05063835	210.3506739	27.13789482	40.2025534	4.678947382	0	3.743157906	10.05063835	8.422105288	25.12659588	0	0	7	419	63	874.14	16.8442096710205	35.1772346496582
927	95	2011-02-08	4	2	0	19.6666660308838	39.6666679382324	0.666666686534882	60	3	2	208	67	1	1	0	1	1	11	869.5374285	1006.186545	3.743157906	0	0.912181185	0	2	0	6.550526335	10.05063835	210.3506739	27.13789482	40.2025534	4.678947382	0	3.743157906	10.05063835	8.422105288	25.12659588	0	0	7	419	63	874.14	16.8442096710205	35.1772346496582
928	102	2012-02-19	0	7	1	30	23	7	60	1	2	208	74	0	1	0	1	1	12	953.4619183	941.7441145	4.562881137	3.112407601	1.303188786	0.66596937	3	1	7.604801895	9.337222802	53.60775925	28.13776701	34.23648361	3.802400948	3.112407601	3.041920758	6.224815202	8.365282085	18.6744456	0	0	7	545.2857143	92.14285714	909	15.2096042633057	28.0116691589355
929	102	2012-02-19	1	7	1	47	7.66666650772095	5.33333349227905	60	3	2	208	74	0	1	0	1	1	12	953.4619183	941.7441145	4.562881137	3.112407601	1.303188786	0.66596937	3	1	7.604801895	9.337222802	53.60775925	28.13776701	34.23648361	3.802400948	3.112407601	3.041920758	6.224815202	8.365282085	18.6744456	0	0	7	545.2857143	92.14285714	909	15.2096042633057	28.0116691589355
930	102	2012-02-19	2	7	1	44.6666679382324	9	6.33333349227905	60	3	2	208	74	0	1	0	1	1	12	953.4619183	941.7441145	4.562881137	3.112407601	1.303188786	0.66596937	3	1	7.604801895	9.337222802	53.60775925	28.13776701	34.23648361	3.802400948	3.112407601	3.041920758	6.224815202	8.365282085	18.6744456	0	0	7	545.2857143	92.14285714	909	15.2096042633057	28.0116691589355
931	102	2012-02-19	3	7	1	45	14	1	60	3	2	208	74	0	1	0	1	1	12	953.4619183	941.7441145	4.562881137	3.112407601	1.303188786	0.66596937	3	1	7.604801895	9.337222802	53.60775925	28.13776701	34.23648361	3.802400948	3.112407601	3.041920758	6.224815202	8.365282085	18.6744456	0	0	7	545.2857143	92.14285714	909	15.2096042633057	28.0116691589355
932	102	2012-02-19	4	7	1	53.3333320617676	6.66666650772095	0	60	3	2	208	74	0	1	0	1	1	12	953.4619183	941.7441145	4.562881137	3.112407601	1.303188786	0.66596937	3	1	7.604801895	9.337222802	53.60775925	28.13776701	34.23648361	3.802400948	3.112407601	3.041920758	6.224815202	8.365282085	18.6744456	0	0	7	545.2857143	92.14285714	909	15.2096042633057	28.0116691589355
933	102	2012-02-20	0	1	0	11	8.66666698455811	4.33333349227905	24	3	2	208	74	0	1	0	1	1	12	953.4619183	941.7441145	4.562881137	3.112407601	1.303188786	0.66596937	3	1	7.604801895	9.337222802	53.60775925	28.13776701	34.23648361	3.802400948	3.112407601	3.041920758	6.224815202	8.365282085	18.6744456	0	0	7	545.2857143	92.14285714	909	15.2096042633057	28.0116691589355
934	102	2012-02-20	1	1	0	24.3333339691162	31.3333339691162	4.33333349227905	60	3	2	208	74	0	1	0	1	1	12	953.4619183	941.7441145	4.562881137	3.112407601	1.303188786	0.66596937	3	1	7.604801895	9.337222802	53.60775925	28.13776701	34.23648361	3.802400948	3.112407601	3.041920758	6.224815202	8.365282085	18.6744456	0	0	7	545.2857143	92.14285714	909	15.2096042633057	28.0116691589355
935	102	2012-02-20	2	1	0	43	16.3333339691162	0.666666686534882	60	3	2	208	74	0	1	0	1	1	12	953.4619183	941.7441145	4.562881137	3.112407601	1.303188786	0.66596937	3	1	7.604801895	9.337222802	53.60775925	28.13776701	34.23648361	3.802400948	3.112407601	3.041920758	6.224815202	8.365282085	18.6744456	0	0	7	545.2857143	92.14285714	909	15.2096042633057	28.0116691589355
936	102	2012-02-20	3	1	0	25	29.6666660308838	5.33333349227905	60	3	2	208	74	0	1	0	1	1	12	953.4619183	941.7441145	4.562881137	3.112407601	1.303188786	0.66596937	3	1	7.604801895	9.337222802	53.60775925	28.13776701	34.23648361	3.802400948	3.112407601	3.041920758	6.224815202	8.365282085	18.6744456	0	0	7	545.2857143	92.14285714	909	15.2096042633057	28.0116691589355
937	102	2012-02-20	4	1	0	51.6666679382324	7.33333349227905	1	60	3	2	208	74	0	1	0	1	1	12	953.4619183	941.7441145	4.562881137	3.112407601	1.303188786	0.66596937	3	1	7.604801895	9.337222802	53.60775925	28.13776701	34.23648361	3.802400948	3.112407601	3.041920758	6.224815202	8.365282085	18.6744456	0	0	7	545.2857143	92.14285714	909	15.2096042633057	28.0116691589355
938	102	2012-02-21	0	2	0	9	12	1.33333337306976	22.3333339691162	3	2	208	74	0	1	0	1	1	12	953.4619183	941.7441145	4.562881137	3.112407601	1.303188786	0.66596937	3	1	7.604801895	9.337222802	53.60775925	28.13776701	34.23648361	3.802400948	3.112407601	3.041920758	6.224815202	8.365282085	18.6744456	0	0	7	545.2857143	92.14285714	909	15.2096042633057	28.0116691589355
939	102	2012-02-21	1	2	0	6.66666650772095	35	18.3333339691162	60	3	2	208	74	0	1	0	1	1	12	953.4619183	941.7441145	4.562881137	3.112407601	1.303188786	0.66596937	3	1	7.604801895	9.337222802	53.60775925	28.13776701	34.23648361	3.802400948	3.112407601	3.041920758	6.224815202	8.365282085	18.6744456	0	0	7	545.2857143	92.14285714	909	15.2096042633057	28.0116691589355
940	102	2012-02-21	2	2	0	34.6666679382324	19	6.33333349227905	60	3	2	208	74	0	1	0	1	1	12	953.4619183	941.7441145	4.562881137	3.112407601	1.303188786	0.66596937	3	1	7.604801895	9.337222802	53.60775925	28.13776701	34.23648361	3.802400948	3.112407601	3.041920758	6.224815202	8.365282085	18.6744456	0	0	7	545.2857143	92.14285714	909	15.2096042633057	28.0116691589355
941	102	2012-02-21	3	2	0	0.666666686534882	28	31.3333339691162	60	3	2	208	74	0	1	0	1	1	12	953.4619183	941.7441145	4.562881137	3.112407601	1.303188786	0.66596937	3	1	7.604801895	9.337222802	53.60775925	28.13776701	34.23648361	3.802400948	3.112407601	3.041920758	6.224815202	8.365282085	18.6744456	0	0	7	545.2857143	92.14285714	909	15.2096042633057	28.0116691589355
942	102	2012-02-21	4	2	0	44.3333320617676	12.3333330154419	3.33333325386047	60	3	2	208	74	0	1	0	1	1	12	953.4619183	941.7441145	4.562881137	3.112407601	1.303188786	0.66596937	3	1	7.604801895	9.337222802	53.60775925	28.13776701	34.23648361	3.802400948	3.112407601	3.041920758	6.224815202	8.365282085	18.6744456	0	0	7	545.2857143	92.14285714	909	15.2096042633057	28.0116691589355
943	102	2012-02-22	0	3	0	7.66666650772095	14.6666669845581	4	26.3333339691162	3	2	208	74	0	1	0	1	1	12	953.4619183	941.7441145	4.562881137	3.112407601	1.303188786	0.66596937	3	1	7.604801895	9.337222802	53.60775925	28.13776701	34.23648361	3.802400948	3.112407601	3.041920758	6.224815202	8.365282085	18.6744456	0	0	7	545.2857143	92.14285714	909	15.2096042633057	28.0116691589355
944	102	2012-02-22	1	3	0	35	24.3333339691162	0.666666686534882	60	3	2	208	74	0	1	0	1	1	12	953.4619183	941.7441145	4.562881137	3.112407601	1.303188786	0.66596937	3	1	7.604801895	9.337222802	53.60775925	28.13776701	34.23648361	3.802400948	3.112407601	3.041920758	6.224815202	8.365282085	18.6744456	0	0	7	545.2857143	92.14285714	909	15.2096042633057	28.0116691589355
945	102	2012-02-22	2	3	0	50.3333320617676	8.66666698455811	1	60	3	2	208	74	0	1	0	1	1	12	953.4619183	941.7441145	4.562881137	3.112407601	1.303188786	0.66596937	3	1	7.604801895	9.337222802	53.60775925	28.13776701	34.23648361	3.802400948	3.112407601	3.041920758	6.224815202	8.365282085	18.6744456	0	0	7	545.2857143	92.14285714	909	15.2096042633057	28.0116691589355
946	102	2012-02-22	3	3	0	22	36	2	60	3	2	208	74	0	1	0	1	1	12	953.4619183	941.7441145	4.562881137	3.112407601	1.303188786	0.66596937	3	1	7.604801895	9.337222802	53.60775925	28.13776701	34.23648361	3.802400948	3.112407601	3.041920758	6.224815202	8.365282085	18.6744456	0	0	7	545.2857143	92.14285714	909	15.2096042633057	28.0116691589355
947	102	2012-02-22	4	3	0	51.6666679382324	7.33333349227905	1	60	3	2	208	74	0	1	0	1	1	12	953.4619183	941.7441145	4.562881137	3.112407601	1.303188786	0.66596937	3	1	7.604801895	9.337222802	53.60775925	28.13776701	34.23648361	3.802400948	3.112407601	3.041920758	6.224815202	8.365282085	18.6744456	0	0	7	545.2857143	92.14285714	909	15.2096042633057	28.0116691589355
948	102	2012-02-23	0	4	0	3.33333325386047	22	13	38.3333320617676	3	2	208	74	0	1	0	1	1	12	953.4619183	941.7441145	4.562881137	3.112407601	1.303188786	0.66596937	3	1	7.604801895	9.337222802	53.60775925	28.13776701	34.23648361	3.802400948	3.112407601	3.041920758	6.224815202	8.365282085	18.6744456	0	0	7	545.2857143	92.14285714	909	15.2096042633057	28.0116691589355
949	102	2012-02-23	1	4	0	8	25.6666660308838	26.3333339691162	60	3	2	208	74	0	1	0	1	1	12	953.4619183	941.7441145	4.562881137	3.112407601	1.303188786	0.66596937	3	1	7.604801895	9.337222802	53.60775925	28.13776701	34.23648361	3.802400948	3.112407601	3.041920758	6.224815202	8.365282085	18.6744456	0	0	7	545.2857143	92.14285714	909	15.2096042633057	28.0116691589355
950	102	2012-02-23	2	4	0	33	15	12	60	3	2	208	74	0	1	0	1	1	12	953.4619183	941.7441145	4.562881137	3.112407601	1.303188786	0.66596937	3	1	7.604801895	9.337222802	53.60775925	28.13776701	34.23648361	3.802400948	3.112407601	3.041920758	6.224815202	8.365282085	18.6744456	0	0	7	545.2857143	92.14285714	909	15.2096042633057	28.0116691589355
951	102	2012-02-23	3	4	0	11.3333330154419	31.6666660308838	17	60	3	2	208	74	0	1	0	1	1	12	953.4619183	941.7441145	4.562881137	3.112407601	1.303188786	0.66596937	3	1	7.604801895	9.337222802	53.60775925	28.13776701	34.23648361	3.802400948	3.112407601	3.041920758	6.224815202	8.365282085	18.6744456	0	0	7	545.2857143	92.14285714	909	15.2096042633057	28.0116691589355
952	102	2012-02-23	4	4	0	44.3333320617676	13	2.66666674613953	60	3	2	208	74	0	1	0	1	1	12	953.4619183	941.7441145	4.562881137	3.112407601	1.303188786	0.66596937	3	1	7.604801895	9.337222802	53.60775925	28.13776701	34.23648361	3.802400948	3.112407601	3.041920758	6.224815202	8.365282085	18.6744456	0	0	7	545.2857143	92.14285714	909	15.2096042633057	28.0116691589355
953	102	2012-02-24	0	5	0	4.66666650772095	16	2.33333325386047	23	3	2	208	74	0	1	0	1	1	12	953.4619183	941.7441145	4.562881137	3.112407601	1.303188786	0.66596937	3	1	7.604801895	9.337222802	53.60775925	28.13776701	34.23648361	3.802400948	3.112407601	3.041920758	6.224815202	8.365282085	18.6744456	0	0	7	545.2857143	92.14285714	909	15.2096042633057	28.0116691589355
954	102	2012-02-24	1	5	0	28.6666660308838	28.3333339691162	3	60	3	2	208	74	0	1	0	1	1	12	953.4619183	941.7441145	4.562881137	3.112407601	1.303188786	0.66596937	3	1	7.604801895	9.337222802	53.60775925	28.13776701	34.23648361	3.802400948	3.112407601	3.041920758	6.224815202	8.365282085	18.6744456	0	0	7	545.2857143	92.14285714	909	15.2096042633057	28.0116691589355
955	102	2012-02-24	2	5	0	50.6666679382324	7.66666650772095	1.66666662693024	60	3	2	208	74	0	1	0	1	1	12	953.4619183	941.7441145	4.562881137	3.112407601	1.303188786	0.66596937	3	1	7.604801895	9.337222802	53.60775925	28.13776701	34.23648361	3.802400948	3.112407601	3.041920758	6.224815202	8.365282085	18.6744456	0	0	7	545.2857143	92.14285714	909	15.2096042633057	28.0116691589355
956	102	2012-02-24	3	5	0	50.6666679382324	8.33333301544189	1	60	3	2	208	74	0	1	0	1	1	12	953.4619183	941.7441145	4.562881137	3.112407601	1.303188786	0.66596937	3	1	7.604801895	9.337222802	53.60775925	28.13776701	34.23648361	3.802400948	3.112407601	3.041920758	6.224815202	8.365282085	18.6744456	0	0	7	545.2857143	92.14285714	909	15.2096042633057	28.0116691589355
957	102	2012-02-24	4	5	0	47.6666679382324	10	2.33333325386047	60	3	2	208	74	0	1	0	1	1	12	953.4619183	941.7441145	4.562881137	3.112407601	1.303188786	0.66596937	3	1	7.604801895	9.337222802	53.60775925	28.13776701	34.23648361	3.802400948	3.112407601	3.041920758	6.224815202	8.365282085	18.6744456	0	0	7	545.2857143	92.14285714	909	15.2096042633057	28.0116691589355
958	102	2012-02-25	0	6	1	11	11	2	24	3	2	208	74	0	1	0	1	1	12	953.4619183	941.7441145	4.562881137	3.112407601	1.303188786	0.66596937	3	1	7.604801895	9.337222802	53.60775925	28.13776701	34.23648361	3.802400948	3.112407601	3.041920758	6.224815202	8.365282085	18.6744456	0	0	7	545.2857143	92.14285714	909	15.2096042633057	28.0116691589355
959	102	2012-02-25	1	6	1	14.6666669845581	36	9.33333301544189	60	3	2	208	74	0	1	0	1	1	12	953.4619183	941.7441145	4.562881137	3.112407601	1.303188786	0.66596937	3	1	7.604801895	9.337222802	53.60775925	28.13776701	34.23648361	3.802400948	3.112407601	3.041920758	6.224815202	8.365282085	18.6744456	0	0	7	545.2857143	92.14285714	909	15.2096042633057	28.0116691589355
960	102	2012-02-25	2	6	1	43.3333320617676	13	3.66666674613953	60	3	2	208	74	0	1	0	1	1	12	953.4619183	941.7441145	4.562881137	3.112407601	1.303188786	0.66596937	3	1	7.604801895	9.337222802	53.60775925	28.13776701	34.23648361	3.802400948	3.112407601	3.041920758	6.224815202	8.365282085	18.6744456	0	0	7	545.2857143	92.14285714	909	15.2096042633057	28.0116691589355
961	102	2012-02-25	3	6	1	33.6666679382324	18.6666660308838	7.66666650772095	60	3	2	208	74	0	1	0	1	1	12	953.4619183	941.7441145	4.562881137	3.112407601	1.303188786	0.66596937	3	1	7.604801895	9.337222802	53.60775925	28.13776701	34.23648361	3.802400948	3.112407601	3.041920758	6.224815202	8.365282085	18.6744456	0	0	7	545.2857143	92.14285714	909	15.2096042633057	28.0116691589355
962	102	2012-02-25	4	6	1	51.6666679382324	7.66666650772095	0.666666686534882	60	3	2	208	74	0	1	0	1	1	12	953.4619183	941.7441145	4.562881137	3.112407601	1.303188786	0.66596937	3	1	7.604801895	9.337222802	53.60775925	28.13776701	34.23648361	3.802400948	3.112407601	3.041920758	6.224815202	8.365282085	18.6744456	0	0	7	545.2857143	92.14285714	909	15.2096042633057	28.0116691589355
963	103	2012-02-19	0	7	1	55	2	3	60	1	2	208	70	1	1	1	1	1	12	1110.970266	1082.673038	5.29641283	6.892706758	1.441879636	0	4	0	6.809673638	10.33906014	107.1105298	35.561629	41.35624055	5.29641283	6.892706758	5.29641283	6.892706758	11.34945606	17.23176689	0	0	6	297.5	113.5	820.5	21.9422817230225	31.0171794891357
964	103	2012-02-19	1	7	1	11.3333330154419	41	7.66666650772095	60	3	2	208	70	1	1	1	1	1	12	1110.970266	1082.673038	5.29641283	6.892706758	1.441879636	0	4	0	6.809673638	10.33906014	107.1105298	35.561629	41.35624055	5.29641283	6.892706758	5.29641283	6.892706758	11.34945606	17.23176689	0	0	6	297.5	113.5	820.5	21.9422817230225	31.0171794891357
965	103	2012-02-19	2	7	1	12.6666669845581	32.6666679382324	14.6666669845581	60	3	2	208	70	1	1	1	1	1	12	1110.970266	1082.673038	5.29641283	6.892706758	1.441879636	0	4	0	6.809673638	10.33906014	107.1105298	35.561629	41.35624055	5.29641283	6.892706758	5.29641283	6.892706758	11.34945606	17.23176689	0	0	6	297.5	113.5	820.5	21.9422817230225	31.0171794891357
966	103	2012-02-19	3	7	1	22	28.3333339691162	9.66666698455811	60	3	2	208	70	1	1	1	1	1	12	1110.970266	1082.673038	5.29641283	6.892706758	1.441879636	0	4	0	6.809673638	10.33906014	107.1105298	35.561629	41.35624055	5.29641283	6.892706758	5.29641283	6.892706758	11.34945606	17.23176689	0	0	6	297.5	113.5	820.5	21.9422817230225	31.0171794891357
967	103	2012-02-19	4	7	1	28.6666660308838	26	5.33333349227905	60	3	2	208	70	1	1	1	1	1	12	1110.970266	1082.673038	5.29641283	6.892706758	1.441879636	0	4	0	6.809673638	10.33906014	107.1105298	35.561629	41.35624055	5.29641283	6.892706758	5.29641283	6.892706758	11.34945606	17.23176689	0	0	6	297.5	113.5	820.5	21.9422817230225	31.0171794891357
968	103	2012-02-20	0	1	0	8.33333301544189	12	4	24.3333339691162	3	2	208	70	1	1	1	1	1	12	1110.970266	1082.673038	5.29641283	6.892706758	1.441879636	0	4	0	6.809673638	10.33906014	107.1105298	35.561629	41.35624055	5.29641283	6.892706758	5.29641283	6.892706758	11.34945606	17.23176689	0	0	6	297.5	113.5	820.5	21.9422817230225	31.0171794891357
969	103	2012-02-20	1	1	0	28	31	1	60	3	2	208	70	1	1	1	1	1	12	1110.970266	1082.673038	5.29641283	6.892706758	1.441879636	0	4	0	6.809673638	10.33906014	107.1105298	35.561629	41.35624055	5.29641283	6.892706758	5.29641283	6.892706758	11.34945606	17.23176689	0	0	6	297.5	113.5	820.5	21.9422817230225	31.0171794891357
970	103	2012-02-20	2	1	0	21	35.6666679382324	3.33333325386047	60	3	2	208	70	1	1	1	1	1	12	1110.970266	1082.673038	5.29641283	6.892706758	1.441879636	0	4	0	6.809673638	10.33906014	107.1105298	35.561629	41.35624055	5.29641283	6.892706758	5.29641283	6.892706758	11.34945606	17.23176689	0	0	6	297.5	113.5	820.5	21.9422817230225	31.0171794891357
971	103	2012-02-20	3	1	0	17.6666660308838	40	2.33333325386047	60	3	2	208	70	1	1	1	1	1	12	1110.970266	1082.673038	5.29641283	6.892706758	1.441879636	0	4	0	6.809673638	10.33906014	107.1105298	35.561629	41.35624055	5.29641283	6.892706758	5.29641283	6.892706758	11.34945606	17.23176689	0	0	6	297.5	113.5	820.5	21.9422817230225	31.0171794891357
972	103	2012-02-20	4	1	0	24.3333339691162	24.6666660308838	11	60	3	2	208	70	1	1	1	1	1	12	1110.970266	1082.673038	5.29641283	6.892706758	1.441879636	0	4	0	6.809673638	10.33906014	107.1105298	35.561629	41.35624055	5.29641283	6.892706758	5.29641283	6.892706758	11.34945606	17.23176689	0	0	6	297.5	113.5	820.5	21.9422817230225	31.0171794891357
973	103	2012-02-21	0	2	0	1.33333337306976	9.66666698455811	5.66666650772095	16.6666660308838	3	2	208	70	1	1	1	1	1	12	1110.970266	1082.673038	5.29641283	6.892706758	1.441879636	0	4	0	6.809673638	10.33906014	107.1105298	35.561629	41.35624055	5.29641283	6.892706758	5.29641283	6.892706758	11.34945606	17.23176689	0	0	6	297.5	113.5	820.5	21.9422817230225	31.0171794891357
974	103	2012-02-21	1	2	0	33	25.3333339691162	1.66666662693024	60	3	2	208	70	1	1	1	1	1	12	1110.970266	1082.673038	5.29641283	6.892706758	1.441879636	0	4	0	6.809673638	10.33906014	107.1105298	35.561629	41.35624055	5.29641283	6.892706758	5.29641283	6.892706758	11.34945606	17.23176689	0	0	6	297.5	113.5	820.5	21.9422817230225	31.0171794891357
975	103	2012-02-21	2	2	0	16.3333339691162	38.3333320617676	5.33333349227905	60	3	2	208	70	1	1	1	1	1	12	1110.970266	1082.673038	5.29641283	6.892706758	1.441879636	0	4	0	6.809673638	10.33906014	107.1105298	35.561629	41.35624055	5.29641283	6.892706758	5.29641283	6.892706758	11.34945606	17.23176689	0	0	6	297.5	113.5	820.5	21.9422817230225	31.0171794891357
976	103	2012-02-21	3	2	0	14.6666669845581	35.6666679382324	9.66666698455811	60	3	2	208	70	1	1	1	1	1	12	1110.970266	1082.673038	5.29641283	6.892706758	1.441879636	0	4	0	6.809673638	10.33906014	107.1105298	35.561629	41.35624055	5.29641283	6.892706758	5.29641283	6.892706758	11.34945606	17.23176689	0	0	6	297.5	113.5	820.5	21.9422817230225	31.0171794891357
977	103	2012-02-21	4	2	0	28	27.6666660308838	4.33333349227905	60	3	2	208	70	1	1	1	1	1	12	1110.970266	1082.673038	5.29641283	6.892706758	1.441879636	0	4	0	6.809673638	10.33906014	107.1105298	35.561629	41.35624055	5.29641283	6.892706758	5.29641283	6.892706758	11.34945606	17.23176689	0	0	6	297.5	113.5	820.5	21.9422817230225	31.0171794891357
978	103	2012-02-22	0	3	0	0	6.66666650772095	3.33333325386047	10	3	2	208	70	1	1	1	1	1	12	1110.970266	1082.673038	5.29641283	6.892706758	1.441879636	0	4	0	6.809673638	10.33906014	107.1105298	35.561629	41.35624055	5.29641283	6.892706758	5.29641283	6.892706758	11.34945606	17.23176689	0	0	6	297.5	113.5	820.5	21.9422817230225	31.0171794891357
979	103	2012-02-22	1	3	0	29	28.6666660308838	2.33333325386047	60	3	2	208	70	1	1	1	1	1	12	1110.970266	1082.673038	5.29641283	6.892706758	1.441879636	0	4	0	6.809673638	10.33906014	107.1105298	35.561629	41.35624055	5.29641283	6.892706758	5.29641283	6.892706758	11.34945606	17.23176689	0	0	6	297.5	113.5	820.5	21.9422817230225	31.0171794891357
980	103	2012-02-22	2	3	0	25.3333339691162	26	8.66666698455811	60	3	2	208	70	1	1	1	1	1	12	1110.970266	1082.673038	5.29641283	6.892706758	1.441879636	0	4	0	6.809673638	10.33906014	107.1105298	35.561629	41.35624055	5.29641283	6.892706758	5.29641283	6.892706758	11.34945606	17.23176689	0	0	6	297.5	113.5	820.5	21.9422817230225	31.0171794891357
981	103	2012-02-22	3	3	0	12	30	18	60	3	2	208	70	1	1	1	1	1	12	1110.970266	1082.673038	5.29641283	6.892706758	1.441879636	0	4	0	6.809673638	10.33906014	107.1105298	35.561629	41.35624055	5.29641283	6.892706758	5.29641283	6.892706758	11.34945606	17.23176689	0	0	6	297.5	113.5	820.5	21.9422817230225	31.0171794891357
982	103	2012-02-22	4	3	0	13.3333330154419	27.6666660308838	19	60	3	2	208	70	1	1	1	1	1	12	1110.970266	1082.673038	5.29641283	6.892706758	1.441879636	0	4	0	6.809673638	10.33906014	107.1105298	35.561629	41.35624055	5.29641283	6.892706758	5.29641283	6.892706758	11.34945606	17.23176689	0	0	6	297.5	113.5	820.5	21.9422817230225	31.0171794891357
983	103	2012-02-23	0	4	0	2.66666674613953	10.3333330154419	3.33333325386047	16.3333339691162	3	2	208	70	1	1	1	1	1	12	1110.970266	1082.673038	5.29641283	6.892706758	1.441879636	0	4	0	6.809673638	10.33906014	107.1105298	35.561629	41.35624055	5.29641283	6.892706758	5.29641283	6.892706758	11.34945606	17.23176689	0	0	6	297.5	113.5	820.5	21.9422817230225	31.0171794891357
984	103	2012-02-23	1	4	0	31.3333339691162	27	1.66666662693024	60	3	2	208	70	1	1	1	1	1	12	1110.970266	1082.673038	5.29641283	6.892706758	1.441879636	0	4	0	6.809673638	10.33906014	107.1105298	35.561629	41.35624055	5.29641283	6.892706758	5.29641283	6.892706758	11.34945606	17.23176689	0	0	6	297.5	113.5	820.5	21.9422817230225	31.0171794891357
985	103	2012-02-23	2	4	0	38	17.6666660308838	4.33333349227905	60	3	2	208	70	1	1	1	1	1	12	1110.970266	1082.673038	5.29641283	6.892706758	1.441879636	0	4	0	6.809673638	10.33906014	107.1105298	35.561629	41.35624055	5.29641283	6.892706758	5.29641283	6.892706758	11.34945606	17.23176689	0	0	6	297.5	113.5	820.5	21.9422817230225	31.0171794891357
986	103	2012-02-23	3	4	0	25.6666660308838	31	3.33333325386047	60	3	2	208	70	1	1	1	1	1	12	1110.970266	1082.673038	5.29641283	6.892706758	1.441879636	0	4	0	6.809673638	10.33906014	107.1105298	35.561629	41.35624055	5.29641283	6.892706758	5.29641283	6.892706758	11.34945606	17.23176689	0	0	6	297.5	113.5	820.5	21.9422817230225	31.0171794891357
987	103	2012-02-23	4	4	0	3	21.3333339691162	24.3333339691162	48.6666679382324	3	2	208	70	1	1	1	1	1	12	1110.970266	1082.673038	5.29641283	6.892706758	1.441879636	0	4	0	6.809673638	10.33906014	107.1105298	35.561629	41.35624055	5.29641283	6.892706758	5.29641283	6.892706758	11.34945606	17.23176689	0	0	6	297.5	113.5	820.5	21.9422817230225	31.0171794891357
988	103	2012-02-24	0	5	0	8	11.3333330154419	11.6666669845581	31	3	2	208	70	1	1	1	1	1	12	1110.970266	1082.673038	5.29641283	6.892706758	1.441879636	0	4	0	6.809673638	10.33906014	107.1105298	35.561629	41.35624055	5.29641283	6.892706758	5.29641283	6.892706758	11.34945606	17.23176689	0	0	6	297.5	113.5	820.5	21.9422817230225	31.0171794891357
989	103	2012-02-24	1	5	0	30.6666660308838	25.3333339691162	4	60	3	2	208	70	1	1	1	1	1	12	1110.970266	1082.673038	5.29641283	6.892706758	1.441879636	0	4	0	6.809673638	10.33906014	107.1105298	35.561629	41.35624055	5.29641283	6.892706758	5.29641283	6.892706758	11.34945606	17.23176689	0	0	6	297.5	113.5	820.5	21.9422817230225	31.0171794891357
990	103	2012-02-24	2	5	0	22.3333339691162	33.3333320617676	4.33333349227905	60	3	2	208	70	1	1	1	1	1	12	1110.970266	1082.673038	5.29641283	6.892706758	1.441879636	0	4	0	6.809673638	10.33906014	107.1105298	35.561629	41.35624055	5.29641283	6.892706758	5.29641283	6.892706758	11.34945606	17.23176689	0	0	6	297.5	113.5	820.5	21.9422817230225	31.0171794891357
991	103	2012-02-24	3	5	0	11.6666669845581	35	13.3333330154419	60	3	2	208	70	1	1	1	1	1	12	1110.970266	1082.673038	5.29641283	6.892706758	1.441879636	0	4	0	6.809673638	10.33906014	107.1105298	35.561629	41.35624055	5.29641283	6.892706758	5.29641283	6.892706758	11.34945606	17.23176689	0	0	6	297.5	113.5	820.5	21.9422817230225	31.0171794891357
992	103	2012-02-24	4	5	0	1.33333337306976	10	10	21.3333339691162	3	2	208	70	1	1	1	1	1	12	1110.970266	1082.673038	5.29641283	6.892706758	1.441879636	0	4	0	6.809673638	10.33906014	107.1105298	35.561629	41.35624055	5.29641283	6.892706758	5.29641283	6.892706758	11.34945606	17.23176689	0	0	6	297.5	113.5	820.5	21.9422817230225	31.0171794891357
993	105	2010-12-22	0	3	0	20.5	11	0	31.5	3	2	208	82	1	1	1	0	1	8	842.6951192	873.9591819	3.445969737	4.309060355	0.912181185	0.66596937	2	1	5.168954606	8.61812071	330.056779	26.70626546	34.47248284	3.445969737	0	2.584477303	8.61812071	6.891939474	8.61812071	0	0	10	564.6	3.5	787.2	12.9223861694336	17.2362422943115
994	105	2010-12-22	1	3	0	7	52	1	60	2	2	208	82	1	1	1	0	1	8	842.6951192	873.9591819	3.445969737	4.309060355	0.912181185	0.66596937	2	1	5.168954606	8.61812071	330.056779	26.70626546	34.47248284	3.445969737	0	2.584477303	8.61812071	6.891939474	8.61812071	0	0	10	564.6	3.5	787.2	12.9223861694336	17.2362422943115
995	105	2010-12-22	4	3	0	35.3333320617676	24.6666660308838	0	60	3	2	208	82	1	1	1	0	1	8	842.6951192	873.9591819	3.445969737	4.309060355	0.912181185	0.66596937	2	1	5.168954606	8.61812071	330.056779	26.70626546	34.47248284	3.445969737	0	2.584477303	8.61812071	6.891939474	8.61812071	0	0	10	564.6	3.5	787.2	12.9223861694336	17.2362422943115
996	105	2010-12-23	1	4	0	14.6000003814697	45.2000007629395	0.200000002980232	60	3	2	208	82	1	1	1	0	1	8	842.6951192	873.9591819	3.445969737	4.309060355	0.912181185	0.66596937	2	1	5.168954606	8.61812071	330.056779	26.70626546	34.47248284	3.445969737	0	2.584477303	8.61812071	6.891939474	8.61812071	0	0	10	564.6	3.5	787.2	12.9223861694336	17.2362422943115
997	105	2010-12-23	2	4	0	29.3999996185303	30.3999996185303	0.200000002980232	60	3	2	208	82	1	1	1	0	1	8	842.6951192	873.9591819	3.445969737	4.309060355	0.912181185	0.66596937	2	1	5.168954606	8.61812071	330.056779	26.70626546	34.47248284	3.445969737	0	2.584477303	8.61812071	6.891939474	8.61812071	0	0	10	564.6	3.5	787.2	12.9223861694336	17.2362422943115
998	105	2010-12-24	2	5	0	17.2857151031494	42.2857131958008	0.428571432828903	60	3	2	208	82	1	1	1	0	1	8	842.6951192	873.9591819	3.445969737	4.309060355	0.912181185	0.66596937	2	1	5.168954606	8.61812071	330.056779	26.70626546	34.47248284	3.445969737	0	2.584477303	8.61812071	6.891939474	8.61812071	0	0	10	564.6	3.5	787.2	12.9223861694336	17.2362422943115
999	105	2010-12-24	3	5	0	45	15	0	60	3	2	208	82	1	1	1	0	1	8	842.6951192	873.9591819	3.445969737	4.309060355	0.912181185	0.66596937	2	1	5.168954606	8.61812071	330.056779	26.70626546	34.47248284	3.445969737	0	2.584477303	8.61812071	6.891939474	8.61812071	0	0	10	564.6	3.5	787.2	12.9223861694336	17.2362422943115
1000	105	2010-12-25	0	6	1	1	59	0	60	2	2	208	82	1	1	1	0	1	8	842.6951192	873.9591819	3.445969737	4.309060355	0.912181185	0.66596937	2	1	5.168954606	8.61812071	330.056779	26.70626546	34.47248284	3.445969737	0	2.584477303	8.61812071	6.891939474	8.61812071	0	0	10	564.6	3.5	787.2	12.9223861694336	17.2362422943115
1001	105	2010-12-25	3	6	1	49	11	0	60	2	2	208	82	1	1	1	0	1	8	842.6951192	873.9591819	3.445969737	4.309060355	0.912181185	0.66596937	2	1	5.168954606	8.61812071	330.056779	26.70626546	34.47248284	3.445969737	0	2.584477303	8.61812071	6.891939474	8.61812071	0	0	10	564.6	3.5	787.2	12.9223861694336	17.2362422943115
1002	105	2010-12-25	4	6	1	15.6666669845581	29.3333339691162	0	45	3	2	208	82	1	1	1	0	1	8	842.6951192	873.9591819	3.445969737	4.309060355	0.912181185	0.66596937	2	1	5.168954606	8.61812071	330.056779	26.70626546	34.47248284	3.445969737	0	2.584477303	8.61812071	6.891939474	8.61812071	0	0	10	564.6	3.5	787.2	12.9223861694336	17.2362422943115
1003	105	2010-12-26	0	0	1	1.39999997615814	58.5999984741211	0	60	3	2	208	82	1	1	1	0	1	8	842.6951192	873.9591819	3.445969737	4.309060355	0.912181185	0.66596937	2	1	5.168954606	8.61812071	330.056779	26.70626546	34.47248284	3.445969737	0	2.584477303	8.61812071	6.891939474	8.61812071	0	0	10	564.6	3.5	787.2	12.9223861694336	17.2362422943115
1004	105	2010-12-26	1	0	1	0.800000011920929	59.2000007629395	0	60	3	2	208	82	1	1	1	0	1	8	842.6951192	873.9591819	3.445969737	4.309060355	0.912181185	0.66596937	2	1	5.168954606	8.61812071	330.056779	26.70626546	34.47248284	3.445969737	0	2.584477303	8.61812071	6.891939474	8.61812071	0	0	10	564.6	3.5	787.2	12.9223861694336	17.2362422943115
1005	105	2010-12-27	1	1	0	5.7142858505249	54.2857131958008	0	60	3	2	208	82	1	1	1	0	1	8	842.6951192	873.9591819	3.445969737	4.309060355	0.912181185	0.66596937	2	1	5.168954606	8.61812071	330.056779	26.70626546	34.47248284	3.445969737	0	2.584477303	8.61812071	6.891939474	8.61812071	0	0	10	564.6	3.5	787.2	12.9223861694336	17.2362422943115
1006	105	2010-12-27	2	1	0	35.7142868041992	24.2857151031494	0	60	3	2	208	82	1	1	1	0	1	8	842.6951192	873.9591819	3.445969737	4.309060355	0.912181185	0.66596937	2	1	5.168954606	8.61812071	330.056779	26.70626546	34.47248284	3.445969737	0	2.584477303	8.61812071	6.891939474	8.61812071	0	0	10	564.6	3.5	787.2	12.9223861694336	17.2362422943115
1007	105	2010-12-28	0	2	0	5	4	0	9	2	2	208	82	1	1	1	0	1	8	842.6951192	873.9591819	3.445969737	4.309060355	0.912181185	0.66596937	2	1	5.168954606	8.61812071	330.056779	26.70626546	34.47248284	3.445969737	0	2.584477303	8.61812071	6.891939474	8.61812071	0	0	10	564.6	3.5	787.2	12.9223861694336	17.2362422943115
1008	105	2010-12-28	2	2	0	45.2000007629395	14.8000001907349	0	60	3	2	208	82	1	1	1	0	1	8	842.6951192	873.9591819	3.445969737	4.309060355	0.912181185	0.66596937	2	1	5.168954606	8.61812071	330.056779	26.70626546	34.47248284	3.445969737	0	2.584477303	8.61812071	6.891939474	8.61812071	0	0	10	564.6	3.5	787.2	12.9223861694336	17.2362422943115
1009	105	2010-12-28	3	2	0	35.2000007629395	12.6400003433228	12.1599998474121	60	3	2	208	82	1	1	1	0	1	8	842.6951192	873.9591819	3.445969737	4.309060355	0.912181185	0.66596937	2	1	5.168954606	8.61812071	330.056779	26.70626546	34.47248284	3.445969737	0	2.584477303	8.61812071	6.891939474	8.61812071	0	0	10	564.6	3.5	787.2	12.9223861694336	17.2362422943115
1010	105	2010-12-28	4	2	0	42.533332824707	10.5333337783813	0.266666680574417	53.3333320617676	3	2	208	82	1	1	1	0	1	8	842.6951192	873.9591819	3.445969737	4.309060355	0.912181185	0.66596937	2	1	5.168954606	8.61812071	330.056779	26.70626546	34.47248284	3.445969737	0	2.584477303	8.61812071	6.891939474	8.61812071	0	0	10	564.6	3.5	787.2	12.9223861694336	17.2362422943115
1011	105	2010-12-29	0	3	0	27.8888893127441	14.222222328186	1.11111116409302	43.2222213745117	3	2	208	82	1	1	1	0	1	8	842.6951192	873.9591819	3.445969737	4.309060355	0.912181185	0.66596937	2	1	5.168954606	8.61812071	330.056779	26.70626546	34.47248284	3.445969737	0	2.584477303	8.61812071	6.891939474	8.61812071	0	0	10	564.6	3.5	787.2	12.9223861694336	17.2362422943115
1012	105	2010-12-29	1	3	0	32.2222213745117	24	3.77777767181396	60	3	2	208	82	1	1	1	0	1	8	842.6951192	873.9591819	3.445969737	4.309060355	0.912181185	0.66596937	2	1	5.168954606	8.61812071	330.056779	26.70626546	34.47248284	3.445969737	0	2.584477303	8.61812071	6.891939474	8.61812071	0	0	10	564.6	3.5	787.2	12.9223861694336	17.2362422943115
1013	105	2010-12-29	4	3	0	21.2000007629395	8.39999961853027	0	29.6000003814697	3	2	208	82	1	1	1	0	1	8	842.6951192	873.9591819	3.445969737	4.309060355	0.912181185	0.66596937	2	1	5.168954606	8.61812071	330.056779	26.70626546	34.47248284	3.445969737	0	2.584477303	8.61812071	6.891939474	8.61812071	0	0	10	564.6	3.5	787.2	12.9223861694336	17.2362422943115
1014	105	2010-12-30	1	4	0	32.2222213745117	27.7777786254883	0	60	3	2	208	82	1	1	1	0	1	8	842.6951192	873.9591819	3.445969737	4.309060355	0.912181185	0.66596937	2	1	5.168954606	8.61812071	330.056779	26.70626546	34.47248284	3.445969737	0	2.584477303	8.61812071	6.891939474	8.61812071	0	0	10	564.6	3.5	787.2	12.9223861694336	17.2362422943115
1015	105	2010-12-30	2	4	0	35.461540222168	23.1538467407227	1.38461542129517	60	3	2	208	82	1	1	1	0	1	8	842.6951192	873.9591819	3.445969737	4.309060355	0.912181185	0.66596937	2	1	5.168954606	8.61812071	330.056779	26.70626546	34.47248284	3.445969737	0	2.584477303	8.61812071	6.891939474	8.61812071	0	0	10	564.6	3.5	787.2	12.9223861694336	17.2362422943115
1016	105	2010-12-30	3	4	0	27	30	3	60	2	2	208	82	1	1	1	0	1	8	842.6951192	873.9591819	3.445969737	4.309060355	0.912181185	0.66596937	2	1	5.168954606	8.61812071	330.056779	26.70626546	34.47248284	3.445969737	0	2.584477303	8.61812071	6.891939474	8.61812071	0	0	10	564.6	3.5	787.2	12.9223861694336	17.2362422943115
1017	105	2010-12-31	2	5	0	20.6000003814697	30.6000003814697	8.80000019073486	60	3	2	208	82	1	1	1	0	1	8	842.6951192	873.9591819	3.445969737	4.309060355	0.912181185	0.66596937	2	1	5.168954606	8.61812071	330.056779	26.70626546	34.47248284	3.445969737	0	2.584477303	8.61812071	6.891939474	8.61812071	0	0	10	564.6	3.5	787.2	12.9223861694336	17.2362422943115
1018	105	2010-12-31	3	5	0	30.25	20.0625	9.6875	60	3	2	208	82	1	1	1	0	1	8	842.6951192	873.9591819	3.445969737	4.309060355	0.912181185	0.66596937	2	1	5.168954606	8.61812071	330.056779	26.70626546	34.47248284	3.445969737	0	2.584477303	8.61812071	6.891939474	8.61812071	0	0	10	564.6	3.5	787.2	12.9223861694336	17.2362422943115
1019	105	2010-12-31	4	5	0	35.3333320617676	24	0.666666686534882	60	3	2	208	82	1	1	1	0	1	8	842.6951192	873.9591819	3.445969737	4.309060355	0.912181185	0.66596937	2	1	5.168954606	8.61812071	330.056779	26.70626546	34.47248284	3.445969737	0	2.584477303	8.61812071	6.891939474	8.61812071	0	0	10	564.6	3.5	787.2	12.9223861694336	17.2362422943115
1020	105	2011-01-01	0	6	1	23.529411315918	12.4117650985718	0.0588235296308994	36	3	2	208	82	1	1	1	0	1	8	842.6951192	873.9591819	3.445969737	4.309060355	0.912181185	0.66596937	2	1	5.168954606	8.61812071	330.056779	26.70626546	34.47248284	3.445969737	0	2.584477303	8.61812071	6.891939474	8.61812071	0	0	10	564.6	3.5	787.2	12.9223861694336	17.2362422943115
1021	105	2011-01-01	1	6	1	46	14	0	60	3	2	208	82	1	1	1	0	1	8	842.6951192	873.9591819	3.445969737	4.309060355	0.912181185	0.66596937	2	1	5.168954606	8.61812071	330.056779	26.70626546	34.47248284	3.445969737	0	2.584477303	8.61812071	6.891939474	8.61812071	0	0	10	564.6	3.5	787.2	12.9223861694336	17.2362422943115
1022	105	2011-01-01	4	6	1	23.3999996185303	10	1.39999997615814	34.7999992370605	3	2	208	82	1	1	1	0	1	8	842.6951192	873.9591819	3.445969737	4.309060355	0.912181185	0.66596937	2	1	5.168954606	8.61812071	330.056779	26.70626546	34.47248284	3.445969737	0	2.584477303	8.61812071	6.891939474	8.61812071	0	0	10	564.6	3.5	787.2	12.9223861694336	17.2362422943115
1023	105	2011-01-02	0	0	1	36	23	1	60	3	2	208	82	1	1	1	0	1	8	842.6951192	873.9591819	3.445969737	4.309060355	0.912181185	0.66596937	2	1	5.168954606	8.61812071	330.056779	26.70626546	34.47248284	3.445969737	0	2.584477303	8.61812071	6.891939474	8.61812071	0	0	10	564.6	3.5	787.2	12.9223861694336	17.2362422943115
1024	105	2011-01-02	1	0	1	41.4736824035645	18.5263156890869	0	60	3	2	208	82	1	1	1	0	1	8	842.6951192	873.9591819	3.445969737	4.309060355	0.912181185	0.66596937	2	1	5.168954606	8.61812071	330.056779	26.70626546	34.47248284	3.445969737	0	2.584477303	8.61812071	6.891939474	8.61812071	0	0	10	564.6	3.5	787.2	12.9223861694336	17.2362422943115
1025	105	2011-01-02	2	0	1	29	17.3333339691162	13.6666669845581	60	3	2	208	82	1	1	1	0	1	8	842.6951192	873.9591819	3.445969737	4.309060355	0.912181185	0.66596937	2	1	5.168954606	8.61812071	330.056779	26.70626546	34.47248284	3.445969737	0	2.584477303	8.61812071	6.891939474	8.61812071	0	0	10	564.6	3.5	787.2	12.9223861694336	17.2362422943115
1026	105	2011-01-03	1	1	0	33	27	0	60	2	2	208	82	1	1	1	0	1	8	842.6951192	873.9591819	3.445969737	4.309060355	0.912181185	0.66596937	2	1	5.168954606	8.61812071	330.056779	26.70626546	34.47248284	3.445969737	0	2.584477303	8.61812071	6.891939474	8.61812071	0	0	10	564.6	3.5	787.2	12.9223861694336	17.2362422943115
1027	105	2011-01-03	2	1	0	34.1111106872559	17.5555553436279	8.33333301544189	60	3	2	208	82	1	1	1	0	1	8	842.6951192	873.9591819	3.445969737	4.309060355	0.912181185	0.66596937	2	1	5.168954606	8.61812071	330.056779	26.70626546	34.47248284	3.445969737	0	2.584477303	8.61812071	6.891939474	8.61812071	0	0	10	564.6	3.5	787.2	12.9223861694336	17.2362422943115
1028	105	2011-01-03	3	1	0	54.4000015258789	5.59999990463257	0	60	3	2	208	82	1	1	1	0	1	8	842.6951192	873.9591819	3.445969737	4.309060355	0.912181185	0.66596937	2	1	5.168954606	8.61812071	330.056779	26.70626546	34.47248284	3.445969737	0	2.584477303	8.61812071	6.891939474	8.61812071	0	0	10	564.6	3.5	787.2	12.9223861694336	17.2362422943115
1029	105	2011-02-01	3	2	0	39	21	0	60	2	2	208	82	1	1	1	0	1	8	842.6951192	873.9591819	3.445969737	4.309060355	0.912181185	0.66596937	2	1	5.168954606	8.61812071	330.056779	26.70626546	34.47248284	3.445969737	0	2.584477303	8.61812071	6.891939474	8.61812071	0	0	10	564.6	3.5	787.2	12.9223861694336	17.2362422943115
1030	105	2011-02-01	4	2	0	43.4000015258789	14.8000001907349	0.200000002980232	58.4000015258789	3	2	208	82	1	1	1	0	1	8	842.6951192	873.9591819	3.445969737	4.309060355	0.912181185	0.66596937	2	1	5.168954606	8.61812071	330.056779	26.70626546	34.47248284	3.445969737	0	2.584477303	8.61812071	6.891939474	8.61812071	0	0	10	564.6	3.5	787.2	12.9223861694336	17.2362422943115
1031	105	2011-03-16	0	3	0	28.6666660308838	7.33333349227905	0.666666686534882	36.6666679382324	3	2	208	82	1	1	1	0	1	8	842.6951192	873.9591819	3.445969737	4.309060355	0.912181185	0.66596937	2	1	5.168954606	8.61812071	330.056779	26.70626546	34.47248284	3.445969737	0	2.584477303	8.61812071	6.891939474	8.61812071	0	0	10	564.6	3.5	787.2	12.9223861694336	17.2362422943115
1032	105	2011-03-16	3	3	0	36	24	0	60	1	2	208	82	1	1	1	0	1	8	842.6951192	873.9591819	3.445969737	4.309060355	0.912181185	0.66596937	2	1	5.168954606	8.61812071	330.056779	26.70626546	34.47248284	3.445969737	0	2.584477303	8.61812071	6.891939474	8.61812071	0	0	10	564.6	3.5	787.2	12.9223861694336	17.2362422943115
1033	105	2011-03-16	4	3	0	30	14.5	0.5	45	3	2	208	82	1	1	1	0	1	8	842.6951192	873.9591819	3.445969737	4.309060355	0.912181185	0.66596937	2	1	5.168954606	8.61812071	330.056779	26.70626546	34.47248284	3.445969737	0	2.584477303	8.61812071	6.891939474	8.61812071	0	0	10	564.6	3.5	787.2	12.9223861694336	17.2362422943115
1034	105	2011-03-17	0	4	0	58	2	0	60	2	2	208	82	1	1	1	0	1	8	842.6951192	873.9591819	3.445969737	4.309060355	0.912181185	0.66596937	2	1	5.168954606	8.61812071	330.056779	26.70626546	34.47248284	3.445969737	0	2.584477303	8.61812071	6.891939474	8.61812071	0	0	10	564.6	3.5	787.2	12.9223861694336	17.2362422943115
1035	105	2011-03-17	1	4	0	48	12	0	60	3	2	208	82	1	1	1	0	1	8	842.6951192	873.9591819	3.445969737	4.309060355	0.912181185	0.66596937	2	1	5.168954606	8.61812071	330.056779	26.70626546	34.47248284	3.445969737	0	2.584477303	8.61812071	6.891939474	8.61812071	0	0	10	564.6	3.5	787.2	12.9223861694336	17.2362422943115
1036	105	2011-03-17	2	4	0	53	7	0	60	3	2	208	82	1	1	1	0	1	8	842.6951192	873.9591819	3.445969737	4.309060355	0.912181185	0.66596937	2	1	5.168954606	8.61812071	330.056779	26.70626546	34.47248284	3.445969737	0	2.584477303	8.61812071	6.891939474	8.61812071	0	0	10	564.6	3.5	787.2	12.9223861694336	17.2362422943115
1037	105	2011-03-18	2	5	0	9.44444465637207	19	31.5555553436279	60	3	2	208	82	1	1	1	0	1	8	842.6951192	873.9591819	3.445969737	4.309060355	0.912181185	0.66596937	2	1	5.168954606	8.61812071	330.056779	26.70626546	34.47248284	3.445969737	0	2.584477303	8.61812071	6.891939474	8.61812071	0	0	10	564.6	3.5	787.2	12.9223861694336	17.2362422943115
1038	105	2011-03-18	3	5	0	33.4000015258789	11	15.6000003814697	60	3	2	208	82	1	1	1	0	1	8	842.6951192	873.9591819	3.445969737	4.309060355	0.912181185	0.66596937	2	1	5.168954606	8.61812071	330.056779	26.70626546	34.47248284	3.445969737	0	2.584477303	8.61812071	6.891939474	8.61812071	0	0	10	564.6	3.5	787.2	12.9223861694336	17.2362422943115
1039	105	2011-03-19	3	6	1	49	11	0	60	2	2	208	82	1	1	1	0	1	8	842.6951192	873.9591819	3.445969737	4.309060355	0.912181185	0.66596937	2	1	5.168954606	8.61812071	330.056779	26.70626546	34.47248284	3.445969737	0	2.584477303	8.61812071	6.891939474	8.61812071	0	0	10	564.6	3.5	787.2	12.9223861694336	17.2362422943115
1040	105	2011-03-19	4	6	1	35.6666679382324	23.3333339691162	1	60	3	2	208	82	1	1	1	0	1	8	842.6951192	873.9591819	3.445969737	4.309060355	0.912181185	0.66596937	2	1	5.168954606	8.61812071	330.056779	26.70626546	34.47248284	3.445969737	0	2.584477303	8.61812071	6.891939474	8.61812071	0	0	10	564.6	3.5	787.2	12.9223861694336	17.2362422943115
1041	107	2012-02-18	0	6	1	16	39	5	60	1	2	208	78	1	0	1	0	1	8	871.9416786	959.2939377	1.461841445	3.394503284	0.66596937	0.66596937	1	1	5.847365782	3.394503284	78.64506909	21.92762168	13.57801314	2.192762168	0	2.192762168	0	5.116445059	3.394503284	0	0	6	535	36.5	986.5	9.50196933746338	3.39450335502625
1042	107	2012-02-18	1	6	1	21	35.3333320617676	3.66666674613953	60	3	2	208	78	1	0	1	0	1	8	871.9416786	959.2939377	1.461841445	3.394503284	0.66596937	0.66596937	1	1	5.847365782	3.394503284	78.64506909	21.92762168	13.57801314	2.192762168	0	2.192762168	0	5.116445059	3.394503284	0	0	6	535	36.5	986.5	9.50196933746338	3.39450335502625
1043	107	2012-02-18	2	6	1	40.3333320617676	19.6666660308838	0	60	3	2	208	78	1	0	1	0	1	8	871.9416786	959.2939377	1.461841445	3.394503284	0.66596937	0.66596937	1	1	5.847365782	3.394503284	78.64506909	21.92762168	13.57801314	2.192762168	0	2.192762168	0	5.116445059	3.394503284	0	0	6	535	36.5	986.5	9.50196933746338	3.39450335502625
1044	107	2012-02-18	3	6	1	23.6666660308838	34	2.33333325386047	60	3	2	208	78	1	0	1	0	1	8	871.9416786	959.2939377	1.461841445	3.394503284	0.66596937	0.66596937	1	1	5.847365782	3.394503284	78.64506909	21.92762168	13.57801314	2.192762168	0	2.192762168	0	5.116445059	3.394503284	0	0	6	535	36.5	986.5	9.50196933746338	3.39450335502625
1045	107	2012-02-18	4	6	1	40	20	0	60	3	2	208	78	1	0	1	0	1	8	871.9416786	959.2939377	1.461841445	3.394503284	0.66596937	0.66596937	1	1	5.847365782	3.394503284	78.64506909	21.92762168	13.57801314	2.192762168	0	2.192762168	0	5.116445059	3.394503284	0	0	6	535	36.5	986.5	9.50196933746338	3.39450335502625
1046	107	2012-02-19	0	7	1	2.33333325386047	23.6666660308838	1.33333337306976	27.3333339691162	3	2	208	78	1	0	1	0	1	8	871.9416786	959.2939377	1.461841445	3.394503284	0.66596937	0.66596937	1	1	5.847365782	3.394503284	78.64506909	21.92762168	13.57801314	2.192762168	0	2.192762168	0	5.116445059	3.394503284	0	0	6	535	36.5	986.5	9.50196933746338	3.39450335502625
1047	107	2012-02-19	1	7	1	20	37.3333320617676	2.66666674613953	60	3	2	208	78	1	0	1	0	1	8	871.9416786	959.2939377	1.461841445	3.394503284	0.66596937	0.66596937	1	1	5.847365782	3.394503284	78.64506909	21.92762168	13.57801314	2.192762168	0	2.192762168	0	5.116445059	3.394503284	0	0	6	535	36.5	986.5	9.50196933746338	3.39450335502625
1048	107	2012-02-19	2	7	1	38.6666679382324	21.3333339691162	0	60	3	2	208	78	1	0	1	0	1	8	871.9416786	959.2939377	1.461841445	3.394503284	0.66596937	0.66596937	1	1	5.847365782	3.394503284	78.64506909	21.92762168	13.57801314	2.192762168	0	2.192762168	0	5.116445059	3.394503284	0	0	6	535	36.5	986.5	9.50196933746338	3.39450335502625
1049	107	2012-02-19	3	7	1	7.33333349227905	42.6666679382324	10	60	3	2	208	78	1	0	1	0	1	8	871.9416786	959.2939377	1.461841445	3.394503284	0.66596937	0.66596937	1	1	5.847365782	3.394503284	78.64506909	21.92762168	13.57801314	2.192762168	0	2.192762168	0	5.116445059	3.394503284	0	0	6	535	36.5	986.5	9.50196933746338	3.39450335502625
1050	107	2012-02-19	4	7	1	38.6666679382324	19.3333339691162	2	60	3	2	208	78	1	0	1	0	1	8	871.9416786	959.2939377	1.461841445	3.394503284	0.66596937	0.66596937	1	1	5.847365782	3.394503284	78.64506909	21.92762168	13.57801314	2.192762168	0	2.192762168	0	5.116445059	3.394503284	0	0	6	535	36.5	986.5	9.50196933746338	3.39450335502625
1051	107	2012-02-20	0	1	0	19	27.3333339691162	0.333333343267441	46.6666679382324	3	2	208	78	1	0	1	0	1	8	871.9416786	959.2939377	1.461841445	3.394503284	0.66596937	0.66596937	1	1	5.847365782	3.394503284	78.64506909	21.92762168	13.57801314	2.192762168	0	2.192762168	0	5.116445059	3.394503284	0	0	6	535	36.5	986.5	9.50196933746338	3.39450335502625
1052	107	2012-02-20	1	1	0	27.6666660308838	31.6666660308838	0.666666686534882	60	3	2	208	78	1	0	1	0	1	8	871.9416786	959.2939377	1.461841445	3.394503284	0.66596937	0.66596937	1	1	5.847365782	3.394503284	78.64506909	21.92762168	13.57801314	2.192762168	0	2.192762168	0	5.116445059	3.394503284	0	0	6	535	36.5	986.5	9.50196933746338	3.39450335502625
1053	107	2012-02-20	2	1	0	39.6666679382324	13	7.33333349227905	60	3	2	208	78	1	0	1	0	1	8	871.9416786	959.2939377	1.461841445	3.394503284	0.66596937	0.66596937	1	1	5.847365782	3.394503284	78.64506909	21.92762168	13.57801314	2.192762168	0	2.192762168	0	5.116445059	3.394503284	0	0	6	535	36.5	986.5	9.50196933746338	3.39450335502625
1054	107	2012-02-20	3	1	0	31.6666660308838	28.3333339691162	0	60	3	2	208	78	1	0	1	0	1	8	871.9416786	959.2939377	1.461841445	3.394503284	0.66596937	0.66596937	1	1	5.847365782	3.394503284	78.64506909	21.92762168	13.57801314	2.192762168	0	2.192762168	0	5.116445059	3.394503284	0	0	6	535	36.5	986.5	9.50196933746338	3.39450335502625
1055	107	2012-02-20	4	1	0	40.3333320617676	19.3333339691162	0.333333343267441	60	3	2	208	78	1	0	1	0	1	8	871.9416786	959.2939377	1.461841445	3.394503284	0.66596937	0.66596937	1	1	5.847365782	3.394503284	78.64506909	21.92762168	13.57801314	2.192762168	0	2.192762168	0	5.116445059	3.394503284	0	0	6	535	36.5	986.5	9.50196933746338	3.39450335502625
1056	107	2012-02-21	0	2	0	23.3333339691162	25.6666660308838	2.66666674613953	51.6666679382324	3	2	208	78	1	0	1	0	1	8	871.9416786	959.2939377	1.461841445	3.394503284	0.66596937	0.66596937	1	1	5.847365782	3.394503284	78.64506909	21.92762168	13.57801314	2.192762168	0	2.192762168	0	5.116445059	3.394503284	0	0	6	535	36.5	986.5	9.50196933746338	3.39450335502625
1057	107	2012-02-21	1	2	0	25.3333339691162	33.6666679382324	1	60	3	2	208	78	1	0	1	0	1	8	871.9416786	959.2939377	1.461841445	3.394503284	0.66596937	0.66596937	1	1	5.847365782	3.394503284	78.64506909	21.92762168	13.57801314	2.192762168	0	2.192762168	0	5.116445059	3.394503284	0	0	6	535	36.5	986.5	9.50196933746338	3.39450335502625
1058	107	2012-02-21	2	2	0	34.3333320617676	19	6.66666650772095	60	3	2	208	78	1	0	1	0	1	8	871.9416786	959.2939377	1.461841445	3.394503284	0.66596937	0.66596937	1	1	5.847365782	3.394503284	78.64506909	21.92762168	13.57801314	2.192762168	0	2.192762168	0	5.116445059	3.394503284	0	0	6	535	36.5	986.5	9.50196933746338	3.39450335502625
1059	107	2012-02-21	3	2	0	32.6666679382324	27	0.333333343267441	60	3	2	208	78	1	0	1	0	1	8	871.9416786	959.2939377	1.461841445	3.394503284	0.66596937	0.66596937	1	1	5.847365782	3.394503284	78.64506909	21.92762168	13.57801314	2.192762168	0	2.192762168	0	5.116445059	3.394503284	0	0	6	535	36.5	986.5	9.50196933746338	3.39450335502625
1060	107	2012-02-21	4	2	0	44.6666679382324	15	0.333333343267441	60	3	2	208	78	1	0	1	0	1	8	871.9416786	959.2939377	1.461841445	3.394503284	0.66596937	0.66596937	1	1	5.847365782	3.394503284	78.64506909	21.92762168	13.57801314	2.192762168	0	2.192762168	0	5.116445059	3.394503284	0	0	6	535	36.5	986.5	9.50196933746338	3.39450335502625
1061	107	2012-02-22	0	3	0	4.33333349227905	39.3333320617676	4.66666650772095	48.3333320617676	3	2	208	78	1	0	1	0	1	8	871.9416786	959.2939377	1.461841445	3.394503284	0.66596937	0.66596937	1	1	5.847365782	3.394503284	78.64506909	21.92762168	13.57801314	2.192762168	0	2.192762168	0	5.116445059	3.394503284	0	0	6	535	36.5	986.5	9.50196933746338	3.39450335502625
1062	107	2012-02-22	1	3	0	8.33333301544189	44.6666679382324	7	60	3	2	208	78	1	0	1	0	1	8	871.9416786	959.2939377	1.461841445	3.394503284	0.66596937	0.66596937	1	1	5.847365782	3.394503284	78.64506909	21.92762168	13.57801314	2.192762168	0	2.192762168	0	5.116445059	3.394503284	0	0	6	535	36.5	986.5	9.50196933746338	3.39450335502625
1063	107	2012-02-22	2	3	0	32	25.3333339691162	2.66666674613953	60	3	2	208	78	1	0	1	0	1	8	871.9416786	959.2939377	1.461841445	3.394503284	0.66596937	0.66596937	1	1	5.847365782	3.394503284	78.64506909	21.92762168	13.57801314	2.192762168	0	2.192762168	0	5.116445059	3.394503284	0	0	6	535	36.5	986.5	9.50196933746338	3.39450335502625
1064	107	2012-02-22	3	3	0	29.3333339691162	29	1.66666662693024	60	3	2	208	78	1	0	1	0	1	8	871.9416786	959.2939377	1.461841445	3.394503284	0.66596937	0.66596937	1	1	5.847365782	3.394503284	78.64506909	21.92762168	13.57801314	2.192762168	0	2.192762168	0	5.116445059	3.394503284	0	0	6	535	36.5	986.5	9.50196933746338	3.39450335502625
1065	107	2012-02-22	4	3	0	40.6666679382324	19	0.333333343267441	60	3	2	208	78	1	0	1	0	1	8	871.9416786	959.2939377	1.461841445	3.394503284	0.66596937	0.66596937	1	1	5.847365782	3.394503284	78.64506909	21.92762168	13.57801314	2.192762168	0	2.192762168	0	5.116445059	3.394503284	0	0	6	535	36.5	986.5	9.50196933746338	3.39450335502625
1066	107	2012-02-23	0	4	0	20.3333339691162	26	1.66666662693024	48	3	2	208	78	1	0	1	0	1	8	871.9416786	959.2939377	1.461841445	3.394503284	0.66596937	0.66596937	1	1	5.847365782	3.394503284	78.64506909	21.92762168	13.57801314	2.192762168	0	2.192762168	0	5.116445059	3.394503284	0	0	6	535	36.5	986.5	9.50196933746338	3.39450335502625
1067	107	2012-02-23	1	4	0	23.3333339691162	34	2.66666674613953	60	3	2	208	78	1	0	1	0	1	8	871.9416786	959.2939377	1.461841445	3.394503284	0.66596937	0.66596937	1	1	5.847365782	3.394503284	78.64506909	21.92762168	13.57801314	2.192762168	0	2.192762168	0	5.116445059	3.394503284	0	0	6	535	36.5	986.5	9.50196933746338	3.39450335502625
1068	107	2012-02-23	2	4	0	34.6666679382324	24.6666660308838	0.666666686534882	60	3	2	208	78	1	0	1	0	1	8	871.9416786	959.2939377	1.461841445	3.394503284	0.66596937	0.66596937	1	1	5.847365782	3.394503284	78.64506909	21.92762168	13.57801314	2.192762168	0	2.192762168	0	5.116445059	3.394503284	0	0	6	535	36.5	986.5	9.50196933746338	3.39450335502625
1069	107	2012-02-23	3	4	0	33	26.3333339691162	0.666666686534882	60	3	2	208	78	1	0	1	0	1	8	871.9416786	959.2939377	1.461841445	3.394503284	0.66596937	0.66596937	1	1	5.847365782	3.394503284	78.64506909	21.92762168	13.57801314	2.192762168	0	2.192762168	0	5.116445059	3.394503284	0	0	6	535	36.5	986.5	9.50196933746338	3.39450335502625
1070	107	2012-02-23	4	4	0	47	12.6666669845581	0.333333343267441	60	3	2	208	78	1	0	1	0	1	8	871.9416786	959.2939377	1.461841445	3.394503284	0.66596937	0.66596937	1	1	5.847365782	3.394503284	78.64506909	21.92762168	13.57801314	2.192762168	0	2.192762168	0	5.116445059	3.394503284	0	0	6	535	36.5	986.5	9.50196933746338	3.39450335502625
1071	113	2011-03-16	0	3	0	7	14	0	21	1	2	208	74	0	1	0	1	1	9	368.6355938	331.6605803	4.629627362	11.64124681	2.169722626	2.169722626	2	2	0	0	1754.141195	6.172836482	3.880415602	1.543209121	3.880415602	1.543209121	3.880415602	0	0	0	0	8	462.88	37.5	844.13	3.08641815185547	7.76083135604858
1072	113	2011-03-16	1	3	0	49	11	0	60	3	2	208	74	0	1	0	1	1	9	368.6355938	331.6605803	4.629627362	11.64124681	2.169722626	2.169722626	2	2	0	0	1754.141195	6.172836482	3.880415602	1.543209121	3.880415602	1.543209121	3.880415602	0	0	0	0	8	462.88	37.5	844.13	3.08641815185547	7.76083135604858
1073	113	2011-03-16	2	3	0	46.25	13.25	0.5	60	3	2	208	74	0	1	0	1	1	9	368.6355938	331.6605803	4.629627362	11.64124681	2.169722626	2.169722626	2	2	0	0	1754.141195	6.172836482	3.880415602	1.543209121	3.880415602	1.543209121	3.880415602	0	0	0	0	8	462.88	37.5	844.13	3.08641815185547	7.76083135604858
1074	113	2011-03-16	3	3	0	43	9.33333301544189	7.66666650772095	60	3	2	208	74	0	1	0	1	1	9	368.6355938	331.6605803	4.629627362	11.64124681	2.169722626	2.169722626	2	2	0	0	1754.141195	6.172836482	3.880415602	1.543209121	3.880415602	1.543209121	3.880415602	0	0	0	0	8	462.88	37.5	844.13	3.08641815185547	7.76083135604858
1075	113	2011-03-16	4	3	0	29.6666660308838	15.6666669845581	14.6666669845581	60	3	2	208	74	0	1	0	1	1	9	368.6355938	331.6605803	4.629627362	11.64124681	2.169722626	2.169722626	2	2	0	0	1754.141195	6.172836482	3.880415602	1.543209121	3.880415602	1.543209121	3.880415602	0	0	0	0	8	462.88	37.5	844.13	3.08641815185547	7.76083135604858
1076	113	2011-03-17	0	4	0	25	11	0	36	2	2	208	74	0	1	0	1	1	9	368.6355938	331.6605803	4.629627362	11.64124681	2.169722626	2.169722626	2	2	0	0	1754.141195	6.172836482	3.880415602	1.543209121	3.880415602	1.543209121	3.880415602	0	0	0	0	8	462.88	37.5	844.13	3.08641815185547	7.76083135604858
1077	113	2011-03-17	1	4	0	40.3333320617676	17	2.66666674613953	60	3	2	208	74	0	1	0	1	1	9	368.6355938	331.6605803	4.629627362	11.64124681	2.169722626	2.169722626	2	2	0	0	1754.141195	6.172836482	3.880415602	1.543209121	3.880415602	1.543209121	3.880415602	0	0	0	0	8	462.88	37.5	844.13	3.08641815185547	7.76083135604858
1078	113	2011-03-17	2	4	0	28.3999996185303	30	1.60000002384186	60	3	2	208	74	0	1	0	1	1	9	368.6355938	331.6605803	4.629627362	11.64124681	2.169722626	2.169722626	2	2	0	0	1754.141195	6.172836482	3.880415602	1.543209121	3.880415602	1.543209121	3.880415602	0	0	0	0	8	462.88	37.5	844.13	3.08641815185547	7.76083135604858
1079	113	2011-03-17	3	4	0	11.25	27.75	21	60	3	2	208	74	0	1	0	1	1	9	368.6355938	331.6605803	4.629627362	11.64124681	2.169722626	2.169722626	2	2	0	0	1754.141195	6.172836482	3.880415602	1.543209121	3.880415602	1.543209121	3.880415602	0	0	0	0	8	462.88	37.5	844.13	3.08641815185547	7.76083135604858
1080	113	2011-03-17	4	4	0	39.6666679382324	20.3333339691162	0	60	3	2	208	74	0	1	0	1	1	9	368.6355938	331.6605803	4.629627362	11.64124681	2.169722626	2.169722626	2	2	0	0	1754.141195	6.172836482	3.880415602	1.543209121	3.880415602	1.543209121	3.880415602	0	0	0	0	8	462.88	37.5	844.13	3.08641815185547	7.76083135604858
1081	113	2011-03-18	0	5	0	2	14	0	16	1	2	208	74	0	1	0	1	1	9	368.6355938	331.6605803	4.629627362	11.64124681	2.169722626	2.169722626	2	2	0	0	1754.141195	6.172836482	3.880415602	1.543209121	3.880415602	1.543209121	3.880415602	0	0	0	0	8	462.88	37.5	844.13	3.08641815185547	7.76083135604858
1082	113	2011-03-18	1	5	0	23.6666660308838	35.3333320617676	1	60	3	2	208	74	0	1	0	1	1	9	368.6355938	331.6605803	4.629627362	11.64124681	2.169722626	2.169722626	2	2	0	0	1754.141195	6.172836482	3.880415602	1.543209121	3.880415602	1.543209121	3.880415602	0	0	0	0	8	462.88	37.5	844.13	3.08641815185547	7.76083135604858
1083	113	2011-03-18	2	5	0	28	28	4	60	3	2	208	74	0	1	0	1	1	9	368.6355938	331.6605803	4.629627362	11.64124681	2.169722626	2.169722626	2	2	0	0	1754.141195	6.172836482	3.880415602	1.543209121	3.880415602	1.543209121	3.880415602	0	0	0	0	8	462.88	37.5	844.13	3.08641815185547	7.76083135604858
1084	113	2011-03-18	3	5	0	12.1999998092651	44.2000007629395	3.59999990463257	60	3	2	208	74	0	1	0	1	1	9	368.6355938	331.6605803	4.629627362	11.64124681	2.169722626	2.169722626	2	2	0	0	1754.141195	6.172836482	3.880415602	1.543209121	3.880415602	1.543209121	3.880415602	0	0	0	0	8	462.88	37.5	844.13	3.08641815185547	7.76083135604858
1085	113	2011-03-18	4	5	0	38.1666679382324	21.8333339691162	0	60	3	2	208	74	0	1	0	1	1	9	368.6355938	331.6605803	4.629627362	11.64124681	2.169722626	2.169722626	2	2	0	0	1754.141195	6.172836482	3.880415602	1.543209121	3.880415602	1.543209121	3.880415602	0	0	0	0	8	462.88	37.5	844.13	3.08641815185547	7.76083135604858
1086	113	2011-03-19	0	6	1	47	13	0	60	1	2	208	74	0	1	0	1	1	9	368.6355938	331.6605803	4.629627362	11.64124681	2.169722626	2.169722626	2	2	0	0	1754.141195	6.172836482	3.880415602	1.543209121	3.880415602	1.543209121	3.880415602	0	0	0	0	8	462.88	37.5	844.13	3.08641815185547	7.76083135604858
1087	113	2011-03-19	1	6	1	37	23	0	60	1	2	208	74	0	1	0	1	1	9	368.6355938	331.6605803	4.629627362	11.64124681	2.169722626	2.169722626	2	2	0	0	1754.141195	6.172836482	3.880415602	1.543209121	3.880415602	1.543209121	3.880415602	0	0	0	0	8	462.88	37.5	844.13	3.08641815185547	7.76083135604858
1088	113	2011-03-20	0	0	1	11	31	11	53	1	2	208	74	0	1	0	1	1	9	368.6355938	331.6605803	4.629627362	11.64124681	2.169722626	2.169722626	2	2	0	0	1754.141195	6.172836482	3.880415602	1.543209121	3.880415602	1.543209121	3.880415602	0	0	0	0	8	462.88	37.5	844.13	3.08641815185547	7.76083135604858
1089	113	2011-03-20	1	0	1	34	25.3999996185303	0.600000023841858	60	3	2	208	74	0	1	0	1	1	9	368.6355938	331.6605803	4.629627362	11.64124681	2.169722626	2.169722626	2	2	0	0	1754.141195	6.172836482	3.880415602	1.543209121	3.880415602	1.543209121	3.880415602	0	0	0	0	8	462.88	37.5	844.13	3.08641815185547	7.76083135604858
1090	113	2011-03-20	2	0	1	34.25	25	0.75	60	3	2	208	74	0	1	0	1	1	9	368.6355938	331.6605803	4.629627362	11.64124681	2.169722626	2.169722626	2	2	0	0	1754.141195	6.172836482	3.880415602	1.543209121	3.880415602	1.543209121	3.880415602	0	0	0	0	8	462.88	37.5	844.13	3.08641815185547	7.76083135604858
1091	113	2011-03-20	3	0	1	42	17.3333339691162	0.666666686534882	60	3	2	208	74	0	1	0	1	1	9	368.6355938	331.6605803	4.629627362	11.64124681	2.169722626	2.169722626	2	2	0	0	1754.141195	6.172836482	3.880415602	1.543209121	3.880415602	1.543209121	3.880415602	0	0	0	0	8	462.88	37.5	844.13	3.08641815185547	7.76083135604858
1092	113	2011-03-20	4	0	1	43.6666679382324	15.6666669845581	0.666666686534882	60	3	2	208	74	0	1	0	1	1	9	368.6355938	331.6605803	4.629627362	11.64124681	2.169722626	2.169722626	2	2	0	0	1754.141195	6.172836482	3.880415602	1.543209121	3.880415602	1.543209121	3.880415602	0	0	0	0	8	462.88	37.5	844.13	3.08641815185547	7.76083135604858
1093	113	2011-03-21	0	1	0	14	32	0	46	1	2	208	74	0	1	0	1	1	9	368.6355938	331.6605803	4.629627362	11.64124681	2.169722626	2.169722626	2	2	0	0	1754.141195	6.172836482	3.880415602	1.543209121	3.880415602	1.543209121	3.880415602	0	0	0	0	8	462.88	37.5	844.13	3.08641815185547	7.76083135604858
1094	113	2011-03-21	1	1	0	26.3333339691162	33.6666679382324	0	60	3	2	208	74	0	1	0	1	1	9	368.6355938	331.6605803	4.629627362	11.64124681	2.169722626	2.169722626	2	2	0	0	1754.141195	6.172836482	3.880415602	1.543209121	3.880415602	1.543209121	3.880415602	0	0	0	0	8	462.88	37.5	844.13	3.08641815185547	7.76083135604858
1095	113	2011-03-21	2	1	0	23	35.7999992370605	1.20000004768372	60	3	2	208	74	0	1	0	1	1	9	368.6355938	331.6605803	4.629627362	11.64124681	2.169722626	2.169722626	2	2	0	0	1754.141195	6.172836482	3.880415602	1.543209121	3.880415602	1.543209121	3.880415602	0	0	0	0	8	462.88	37.5	844.13	3.08641815185547	7.76083135604858
1096	113	2011-03-21	3	1	0	25.6666660308838	32	2.33333325386047	60	3	2	208	74	0	1	0	1	1	9	368.6355938	331.6605803	4.629627362	11.64124681	2.169722626	2.169722626	2	2	0	0	1754.141195	6.172836482	3.880415602	1.543209121	3.880415602	1.543209121	3.880415602	0	0	0	0	8	462.88	37.5	844.13	3.08641815185547	7.76083135604858
1097	113	2011-03-21	4	1	0	38.6666679382324	21.3333339691162	0	60	3	2	208	74	0	1	0	1	1	9	368.6355938	331.6605803	4.629627362	11.64124681	2.169722626	2.169722626	2	2	0	0	1754.141195	6.172836482	3.880415602	1.543209121	3.880415602	1.543209121	3.880415602	0	0	0	0	8	462.88	37.5	844.13	3.08641815185547	7.76083135604858
1098	113	2011-03-22	0	2	0	12	23	0.5	35.5	2	2	208	74	0	1	0	1	1	9	368.6355938	331.6605803	4.629627362	11.64124681	2.169722626	2.169722626	2	2	0	0	1754.141195	6.172836482	3.880415602	1.543209121	3.880415602	1.543209121	3.880415602	0	0	0	0	8	462.88	37.5	844.13	3.08641815185547	7.76083135604858
1099	113	2011-03-22	1	2	0	25	31.2000007629395	3.79999995231628	60	3	2	208	74	0	1	0	1	1	9	368.6355938	331.6605803	4.629627362	11.64124681	2.169722626	2.169722626	2	2	0	0	1754.141195	6.172836482	3.880415602	1.543209121	3.880415602	1.543209121	3.880415602	0	0	0	0	8	462.88	37.5	844.13	3.08641815185547	7.76083135604858
1100	113	2011-03-22	2	2	0	26.3333339691162	31.3333339691162	2.33333325386047	60	3	2	208	74	0	1	0	1	1	9	368.6355938	331.6605803	4.629627362	11.64124681	2.169722626	2.169722626	2	2	0	0	1754.141195	6.172836482	3.880415602	1.543209121	3.880415602	1.543209121	3.880415602	0	0	0	0	8	462.88	37.5	844.13	3.08641815185547	7.76083135604858
1101	113	2011-03-22	3	2	0	27.3333339691162	27.6666660308838	5	60	3	2	208	74	0	1	0	1	1	9	368.6355938	331.6605803	4.629627362	11.64124681	2.169722626	2.169722626	2	2	0	0	1754.141195	6.172836482	3.880415602	1.543209121	3.880415602	1.543209121	3.880415602	0	0	0	0	8	462.88	37.5	844.13	3.08641815185547	7.76083135604858
1102	113	2011-03-22	4	2	0	40.5	19.3333339691162	0.16666667163372	60	3	2	208	74	0	1	0	1	1	9	368.6355938	331.6605803	4.629627362	11.64124681	2.169722626	2.169722626	2	2	0	0	1754.141195	6.172836482	3.880415602	1.543209121	3.880415602	1.543209121	3.880415602	0	0	0	0	8	462.88	37.5	844.13	3.08641815185547	7.76083135604858
1103	116	2012-03-21	0	3	0	18	38	4	60	1	2	208	68	0	1	0	1	1	10	351.0141299	378.9749549	1.696210425	0	0	0	0	0	0	0	1442.331006	5.088631274	5.483716388	1.696210425	5.483716388	1.696210425	0	0	0	0	0	5	332.4	89.4	817.6	3.39242076873779	5.48371648788452
1104	116	2012-03-21	1	3	0	20	33.6666679382324	6.33333349227905	60	3	2	208	68	0	1	0	1	1	10	351.0141299	378.9749549	1.696210425	0	0	0	0	0	0	0	1442.331006	5.088631274	5.483716388	1.696210425	5.483716388	1.696210425	0	0	0	0	0	5	332.4	89.4	817.6	3.39242076873779	5.48371648788452
1105	116	2012-03-21	2	3	0	25	29	6	60	3	2	208	68	0	1	0	1	1	10	351.0141299	378.9749549	1.696210425	0	0	0	0	0	0	0	1442.331006	5.088631274	5.483716388	1.696210425	5.483716388	1.696210425	0	0	0	0	0	5	332.4	89.4	817.6	3.39242076873779	5.48371648788452
1106	116	2012-03-21	3	3	0	8	44	8	60	3	2	208	68	0	1	0	1	1	10	351.0141299	378.9749549	1.696210425	0	0	0	0	0	0	0	1442.331006	5.088631274	5.483716388	1.696210425	5.483716388	1.696210425	0	0	0	0	0	5	332.4	89.4	817.6	3.39242076873779	5.48371648788452
1107	116	2012-03-21	4	3	0	33	24.3333339691162	2.66666674613953	60	3	2	208	68	0	1	0	1	1	10	351.0141299	378.9749549	1.696210425	0	0	0	0	0	0	0	1442.331006	5.088631274	5.483716388	1.696210425	5.483716388	1.696210425	0	0	0	0	0	5	332.4	89.4	817.6	3.39242076873779	5.48371648788452
1108	116	2012-03-22	0	4	0	4.66666650772095	0.333333343267441	0	5	3	2	208	68	0	1	0	1	1	10	351.0141299	378.9749549	1.696210425	0	0	0	0	0	0	0	1442.331006	5.088631274	5.483716388	1.696210425	5.483716388	1.696210425	0	0	0	0	0	5	332.4	89.4	817.6	3.39242076873779	5.48371648788452
1109	116	2012-03-22	1	4	0	44	15	1	60	3	2	208	68	0	1	0	1	1	10	351.0141299	378.9749549	1.696210425	0	0	0	0	0	0	0	1442.331006	5.088631274	5.483716388	1.696210425	5.483716388	1.696210425	0	0	0	0	0	5	332.4	89.4	817.6	3.39242076873779	5.48371648788452
1110	116	2012-03-22	2	4	0	21.3333339691162	37	1.66666662693024	60	3	2	208	68	0	1	0	1	1	10	351.0141299	378.9749549	1.696210425	0	0	0	0	0	0	0	1442.331006	5.088631274	5.483716388	1.696210425	5.483716388	1.696210425	0	0	0	0	0	5	332.4	89.4	817.6	3.39242076873779	5.48371648788452
1111	116	2012-03-22	3	4	0	18.6666660308838	41.3333320617676	0	60	3	2	208	68	0	1	0	1	1	10	351.0141299	378.9749549	1.696210425	0	0	0	0	0	0	0	1442.331006	5.088631274	5.483716388	1.696210425	5.483716388	1.696210425	0	0	0	0	0	5	332.4	89.4	817.6	3.39242076873779	5.48371648788452
1112	116	2012-03-22	4	4	0	26.3333339691162	31	2.66666674613953	60	3	2	208	68	0	1	0	1	1	10	351.0141299	378.9749549	1.696210425	0	0	0	0	0	0	0	1442.331006	5.088631274	5.483716388	1.696210425	5.483716388	1.696210425	0	0	0	0	0	5	332.4	89.4	817.6	3.39242076873779	5.48371648788452
1113	116	2012-03-23	0	5	0	9	1	1	11	3	2	208	68	0	1	0	1	1	10	351.0141299	378.9749549	1.696210425	0	0	0	0	0	0	0	1442.331006	5.088631274	5.483716388	1.696210425	5.483716388	1.696210425	0	0	0	0	0	5	332.4	89.4	817.6	3.39242076873779	5.48371648788452
1114	116	2012-03-23	1	5	0	1.66666662693024	41.3333320617676	17	60	3	2	208	68	0	1	0	1	1	10	351.0141299	378.9749549	1.696210425	0	0	0	0	0	0	0	1442.331006	5.088631274	5.483716388	1.696210425	5.483716388	1.696210425	0	0	0	0	0	5	332.4	89.4	817.6	3.39242076873779	5.48371648788452
1115	116	2012-03-23	2	5	0	8.33333301544189	15.3333330154419	36.3333320617676	60	3	2	208	68	0	1	0	1	1	10	351.0141299	378.9749549	1.696210425	0	0	0	0	0	0	0	1442.331006	5.088631274	5.483716388	1.696210425	5.483716388	1.696210425	0	0	0	0	0	5	332.4	89.4	817.6	3.39242076873779	5.48371648788452
1116	116	2012-03-23	3	5	0	8.66666698455811	24.3333339691162	27	60	3	2	208	68	0	1	0	1	1	10	351.0141299	378.9749549	1.696210425	0	0	0	0	0	0	0	1442.331006	5.088631274	5.483716388	1.696210425	5.483716388	1.696210425	0	0	0	0	0	5	332.4	89.4	817.6	3.39242076873779	5.48371648788452
1117	116	2012-03-23	4	5	0	40.6666679382324	18.6666660308838	0.666666686534882	60	3	2	208	68	0	1	0	1	1	10	351.0141299	378.9749549	1.696210425	0	0	0	0	0	0	0	1442.331006	5.088631274	5.483716388	1.696210425	5.483716388	1.696210425	0	0	0	0	0	5	332.4	89.4	817.6	3.39242076873779	5.48371648788452
1118	116	2012-03-24	0	6	1	13.3333330154419	0.666666686534882	0	14	3	2	208	68	0	1	0	1	1	10	351.0141299	378.9749549	1.696210425	0	0	0	0	0	0	0	1442.331006	5.088631274	5.483716388	1.696210425	5.483716388	1.696210425	0	0	0	0	0	5	332.4	89.4	817.6	3.39242076873779	5.48371648788452
1119	116	2012-03-24	1	6	1	35.3333320617676	19.6666660308838	5	60	3	2	208	68	0	1	0	1	1	10	351.0141299	378.9749549	1.696210425	0	0	0	0	0	0	0	1442.331006	5.088631274	5.483716388	1.696210425	5.483716388	1.696210425	0	0	0	0	0	5	332.4	89.4	817.6	3.39242076873779	5.48371648788452
1120	116	2012-03-24	2	6	1	19	31.6666660308838	9.33333301544189	60	3	2	208	68	0	1	0	1	1	10	351.0141299	378.9749549	1.696210425	0	0	0	0	0	0	0	1442.331006	5.088631274	5.483716388	1.696210425	5.483716388	1.696210425	0	0	0	0	0	5	332.4	89.4	817.6	3.39242076873779	5.48371648788452
1121	116	2012-03-24	3	6	1	8.33333301544189	42	9.66666698455811	60	3	2	208	68	0	1	0	1	1	10	351.0141299	378.9749549	1.696210425	0	0	0	0	0	0	0	1442.331006	5.088631274	5.483716388	1.696210425	5.483716388	1.696210425	0	0	0	0	0	5	332.4	89.4	817.6	3.39242076873779	5.48371648788452
1122	116	2012-03-24	4	6	1	39.6666679382324	19.3333339691162	1	60	3	2	208	68	0	1	0	1	1	10	351.0141299	378.9749549	1.696210425	0	0	0	0	0	0	0	1442.331006	5.088631274	5.483716388	1.696210425	5.483716388	1.696210425	0	0	0	0	0	5	332.4	89.4	817.6	3.39242076873779	5.48371648788452
1123	116	2012-03-25	0	7	1	19.6666660308838	28	2	49.6666679382324	3	2	208	68	0	1	0	1	1	10	351.0141299	378.9749549	1.696210425	0	0	0	0	0	0	0	1442.331006	5.088631274	5.483716388	1.696210425	5.483716388	1.696210425	0	0	0	0	0	5	332.4	89.4	817.6	3.39242076873779	5.48371648788452
1124	116	2012-03-25	1	7	1	6.66666650772095	50	3.33333325386047	60	3	2	208	68	0	1	0	1	1	10	351.0141299	378.9749549	1.696210425	0	0	0	0	0	0	0	1442.331006	5.088631274	5.483716388	1.696210425	5.483716388	1.696210425	0	0	0	0	0	5	332.4	89.4	817.6	3.39242076873779	5.48371648788452
1125	116	2012-03-25	2	7	1	12.3333330154419	45	2.66666674613953	60	3	2	208	68	0	1	0	1	1	10	351.0141299	378.9749549	1.696210425	0	0	0	0	0	0	0	1442.331006	5.088631274	5.483716388	1.696210425	5.483716388	1.696210425	0	0	0	0	0	5	332.4	89.4	817.6	3.39242076873779	5.48371648788452
1126	116	2012-03-25	3	7	1	11.5	40	2	53.5	2	2	208	68	0	1	0	1	1	10	351.0141299	378.9749549	1.696210425	0	0	0	0	0	0	0	1442.331006	5.088631274	5.483716388	1.696210425	5.483716388	1.696210425	0	0	0	0	0	5	332.4	89.4	817.6	3.39242076873779	5.48371648788452
1127	118	2011-03-18	0	5	0	43	16	1	60	1	2	208	76	1	1	0	1	1	8	1927.648785	1974.724251	8.270349009	25.47967795	9.480286879	3.856306804	7	3	7.08887058	7.279907986	284.4315777	61.43687836	76.43903385	14.76848037	18.19976996	15.35921959	25.47967795	10.63330587	14.55981597	0.590739215	0	8	405.38	65.75	853.5	41.3517456054688	58.2392654418945
1128	118	2011-03-19	0	6	1	4	11	2	17	1	2	208	76	1	1	0	1	1	8	1927.648785	1974.724251	8.270349009	25.47967795	9.480286879	3.856306804	7	3	7.08887058	7.279907986	284.4315777	61.43687836	76.43903385	14.76848037	18.19976996	15.35921959	25.47967795	10.63330587	14.55981597	0.590739215	0	8	405.38	65.75	853.5	41.3517456054688	58.2392654418945
1129	118	2011-03-19	1	6	1	17	29	14	60	3	2	208	76	1	1	0	1	1	8	1927.648785	1974.724251	8.270349009	25.47967795	9.480286879	3.856306804	7	3	7.08887058	7.279907986	284.4315777	61.43687836	76.43903385	14.76848037	18.19976996	15.35921959	25.47967795	10.63330587	14.55981597	0.590739215	0	8	405.38	65.75	853.5	41.3517456054688	58.2392654418945
1130	118	2011-03-19	2	6	1	29.6666660308838	27	3.33333325386047	60	3	2	208	76	1	1	0	1	1	8	1927.648785	1974.724251	8.270349009	25.47967795	9.480286879	3.856306804	7	3	7.08887058	7.279907986	284.4315777	61.43687836	76.43903385	14.76848037	18.19976996	15.35921959	25.47967795	10.63330587	14.55981597	0.590739215	0	8	405.38	65.75	853.5	41.3517456054688	58.2392654418945
1131	118	2011-03-19	3	6	1	18.3333339691162	36.6666679382324	5	60	3	2	208	76	1	1	0	1	1	8	1927.648785	1974.724251	8.270349009	25.47967795	9.480286879	3.856306804	7	3	7.08887058	7.279907986	284.4315777	61.43687836	76.43903385	14.76848037	18.19976996	15.35921959	25.47967795	10.63330587	14.55981597	0.590739215	0	8	405.38	65.75	853.5	41.3517456054688	58.2392654418945
1132	118	2011-03-19	4	6	1	31.6666660308838	28.3333339691162	0	60	3	2	208	76	1	1	0	1	1	8	1927.648785	1974.724251	8.270349009	25.47967795	9.480286879	3.856306804	7	3	7.08887058	7.279907986	284.4315777	61.43687836	76.43903385	14.76848037	18.19976996	15.35921959	25.47967795	10.63330587	14.55981597	0.590739215	0	8	405.38	65.75	853.5	41.3517456054688	58.2392654418945
1133	118	2011-03-20	0	0	1	21	36	2	59	1	2	208	76	1	1	0	1	1	8	1927.648785	1974.724251	8.270349009	25.47967795	9.480286879	3.856306804	7	3	7.08887058	7.279907986	284.4315777	61.43687836	76.43903385	14.76848037	18.19976996	15.35921959	25.47967795	10.63330587	14.55981597	0.590739215	0	8	405.38	65.75	853.5	41.3517456054688	58.2392654418945
1134	118	2011-03-20	1	0	1	33.3333320617676	25.3333339691162	1.33333337306976	60	3	2	208	76	1	1	0	1	1	8	1927.648785	1974.724251	8.270349009	25.47967795	9.480286879	3.856306804	7	3	7.08887058	7.279907986	284.4315777	61.43687836	76.43903385	14.76848037	18.19976996	15.35921959	25.47967795	10.63330587	14.55981597	0.590739215	0	8	405.38	65.75	853.5	41.3517456054688	58.2392654418945
1135	118	2011-03-20	2	0	1	23	34.3333320617676	2.66666674613953	60	3	2	208	76	1	1	0	1	1	8	1927.648785	1974.724251	8.270349009	25.47967795	9.480286879	3.856306804	7	3	7.08887058	7.279907986	284.4315777	61.43687836	76.43903385	14.76848037	18.19976996	15.35921959	25.47967795	10.63330587	14.55981597	0.590739215	0	8	405.38	65.75	853.5	41.3517456054688	58.2392654418945
1136	118	2011-03-20	3	0	1	25.6666660308838	28.3333339691162	6	60	3	2	208	76	1	1	0	1	1	8	1927.648785	1974.724251	8.270349009	25.47967795	9.480286879	3.856306804	7	3	7.08887058	7.279907986	284.4315777	61.43687836	76.43903385	14.76848037	18.19976996	15.35921959	25.47967795	10.63330587	14.55981597	0.590739215	0	8	405.38	65.75	853.5	41.3517456054688	58.2392654418945
1137	118	2011-03-20	4	0	1	39.6666679382324	20	0.333333343267441	60	3	2	208	76	1	1	0	1	1	8	1927.648785	1974.724251	8.270349009	25.47967795	9.480286879	3.856306804	7	3	7.08887058	7.279907986	284.4315777	61.43687836	76.43903385	14.76848037	18.19976996	15.35921959	25.47967795	10.63330587	14.55981597	0.590739215	0	8	405.38	65.75	853.5	41.3517456054688	58.2392654418945
1138	118	2011-03-21	1	1	0	9	27.6666660308838	16.6666660308838	53.3333320617676	3	2	208	76	1	1	0	1	1	8	1927.648785	1974.724251	8.270349009	25.47967795	9.480286879	3.856306804	7	3	7.08887058	7.279907986	284.4315777	61.43687836	76.43903385	14.76848037	18.19976996	15.35921959	25.47967795	10.63330587	14.55981597	0.590739215	0	8	405.38	65.75	853.5	41.3517456054688	58.2392654418945
1139	118	2011-03-21	2	1	0	33.6666679382324	24.3333339691162	2	60	3	2	208	76	1	1	0	1	1	8	1927.648785	1974.724251	8.270349009	25.47967795	9.480286879	3.856306804	7	3	7.08887058	7.279907986	284.4315777	61.43687836	76.43903385	14.76848037	18.19976996	15.35921959	25.47967795	10.63330587	14.55981597	0.590739215	0	8	405.38	65.75	853.5	41.3517456054688	58.2392654418945
1140	118	2011-03-21	3	1	0	17.8333339691162	36.1666679382324	6	60	3	2	208	76	1	1	0	1	1	8	1927.648785	1974.724251	8.270349009	25.47967795	9.480286879	3.856306804	7	3	7.08887058	7.279907986	284.4315777	61.43687836	76.43903385	14.76848037	18.19976996	15.35921959	25.47967795	10.63330587	14.55981597	0.590739215	0	8	405.38	65.75	853.5	41.3517456054688	58.2392654418945
1141	118	2011-03-21	4	1	0	33	26.6666660308838	0.333333343267441	60	3	2	208	76	1	1	0	1	1	8	1927.648785	1974.724251	8.270349009	25.47967795	9.480286879	3.856306804	7	3	7.08887058	7.279907986	284.4315777	61.43687836	76.43903385	14.76848037	18.19976996	15.35921959	25.47967795	10.63330587	14.55981597	0.590739215	0	8	405.38	65.75	853.5	41.3517456054688	58.2392654418945
1142	118	2011-03-22	0	2	0	4	23.6666660308838	2.66666674613953	30.3333339691162	3	2	208	76	1	1	0	1	1	8	1927.648785	1974.724251	8.270349009	25.47967795	9.480286879	3.856306804	7	3	7.08887058	7.279907986	284.4315777	61.43687836	76.43903385	14.76848037	18.19976996	15.35921959	25.47967795	10.63330587	14.55981597	0.590739215	0	8	405.38	65.75	853.5	41.3517456054688	58.2392654418945
1143	118	2011-03-22	1	2	0	28.1666660308838	22.6666660308838	9.16666698455811	60	3	2	208	76	1	1	0	1	1	8	1927.648785	1974.724251	8.270349009	25.47967795	9.480286879	3.856306804	7	3	7.08887058	7.279907986	284.4315777	61.43687836	76.43903385	14.76848037	18.19976996	15.35921959	25.47967795	10.63330587	14.55981597	0.590739215	0	8	405.38	65.75	853.5	41.3517456054688	58.2392654418945
1144	118	2011-03-22	2	2	0	30.25	25	4.75	60	3	2	208	76	1	1	0	1	1	8	1927.648785	1974.724251	8.270349009	25.47967795	9.480286879	3.856306804	7	3	7.08887058	7.279907986	284.4315777	61.43687836	76.43903385	14.76848037	18.19976996	15.35921959	25.47967795	10.63330587	14.55981597	0.590739215	0	8	405.38	65.75	853.5	41.3517456054688	58.2392654418945
1145	118	2011-03-22	3	2	0	22.6666660308838	30	7.33333349227905	60	3	2	208	76	1	1	0	1	1	8	1927.648785	1974.724251	8.270349009	25.47967795	9.480286879	3.856306804	7	3	7.08887058	7.279907986	284.4315777	61.43687836	76.43903385	14.76848037	18.19976996	15.35921959	25.47967795	10.63330587	14.55981597	0.590739215	0	8	405.38	65.75	853.5	41.3517456054688	58.2392654418945
1146	118	2011-03-22	4	2	0	33.6666679382324	26	0.333333343267441	60	3	2	208	76	1	1	0	1	1	8	1927.648785	1974.724251	8.270349009	25.47967795	9.480286879	3.856306804	7	3	7.08887058	7.279907986	284.4315777	61.43687836	76.43903385	14.76848037	18.19976996	15.35921959	25.47967795	10.63330587	14.55981597	0.590739215	0	8	405.38	65.75	853.5	41.3517456054688	58.2392654418945
1147	118	2012-03-01	0	4	0	34	24	2	60	1	2	208	76	1	1	0	1	1	8	1927.648785	1974.724251	8.270349009	25.47967795	9.480286879	3.856306804	7	3	7.08887058	7.279907986	284.4315777	61.43687836	76.43903385	14.76848037	18.19976996	15.35921959	25.47967795	10.63330587	14.55981597	0.590739215	0	8	405.38	65.75	853.5	41.3517456054688	58.2392654418945
1148	118	2012-03-01	1	4	0	33	25.6666660308838	1.33333337306976	60	3	2	208	76	1	1	0	1	1	8	1927.648785	1974.724251	8.270349009	25.47967795	9.480286879	3.856306804	7	3	7.08887058	7.279907986	284.4315777	61.43687836	76.43903385	14.76848037	18.19976996	15.35921959	25.47967795	10.63330587	14.55981597	0.590739215	0	8	405.38	65.75	853.5	41.3517456054688	58.2392654418945
1149	118	2012-03-01	2	4	0	23.7999992370605	32.2000007629395	4	60	3	2	208	76	1	1	0	1	1	8	1927.648785	1974.724251	8.270349009	25.47967795	9.480286879	3.856306804	7	3	7.08887058	7.279907986	284.4315777	61.43687836	76.43903385	14.76848037	18.19976996	15.35921959	25.47967795	10.63330587	14.55981597	0.590739215	0	8	405.38	65.75	853.5	41.3517456054688	58.2392654418945
1150	118	2012-03-01	3	4	0	23	29.6666660308838	7.33333349227905	60	3	2	208	76	1	1	0	1	1	8	1927.648785	1974.724251	8.270349009	25.47967795	9.480286879	3.856306804	7	3	7.08887058	7.279907986	284.4315777	61.43687836	76.43903385	14.76848037	18.19976996	15.35921959	25.47967795	10.63330587	14.55981597	0.590739215	0	8	405.38	65.75	853.5	41.3517456054688	58.2392654418945
1151	118	2012-03-01	4	4	0	34.6666679382324	23.6666660308838	1.66666662693024	60	3	2	208	76	1	1	0	1	1	8	1927.648785	1974.724251	8.270349009	25.47967795	9.480286879	3.856306804	7	3	7.08887058	7.279907986	284.4315777	61.43687836	76.43903385	14.76848037	18.19976996	15.35921959	25.47967795	10.63330587	14.55981597	0.590739215	0	8	405.38	65.75	853.5	41.3517456054688	58.2392654418945
1152	118	2012-03-02	0	5	0	10	24	2	36	1	2	208	76	1	1	0	1	1	8	1927.648785	1974.724251	8.270349009	25.47967795	9.480286879	3.856306804	7	3	7.08887058	7.279907986	284.4315777	61.43687836	76.43903385	14.76848037	18.19976996	15.35921959	25.47967795	10.63330587	14.55981597	0.590739215	0	8	405.38	65.75	853.5	41.3517456054688	58.2392654418945
1153	118	2012-03-02	1	5	0	13.6666669845581	23.3333339691162	23	60	3	2	208	76	1	1	0	1	1	8	1927.648785	1974.724251	8.270349009	25.47967795	9.480286879	3.856306804	7	3	7.08887058	7.279907986	284.4315777	61.43687836	76.43903385	14.76848037	18.19976996	15.35921959	25.47967795	10.63330587	14.55981597	0.590739215	0	8	405.38	65.75	853.5	41.3517456054688	58.2392654418945
1154	118	2012-03-02	2	5	0	30.6666660308838	28.3333339691162	1	60	3	2	208	76	1	1	0	1	1	8	1927.648785	1974.724251	8.270349009	25.47967795	9.480286879	3.856306804	7	3	7.08887058	7.279907986	284.4315777	61.43687836	76.43903385	14.76848037	18.19976996	15.35921959	25.47967795	10.63330587	14.55981597	0.590739215	0	8	405.38	65.75	853.5	41.3517456054688	58.2392654418945
1155	118	2012-03-02	3	5	0	27.3333339691162	29.3333339691162	3.33333325386047	60	3	2	208	76	1	1	0	1	1	8	1927.648785	1974.724251	8.270349009	25.47967795	9.480286879	3.856306804	7	3	7.08887058	7.279907986	284.4315777	61.43687836	76.43903385	14.76848037	18.19976996	15.35921959	25.47967795	10.63330587	14.55981597	0.590739215	0	8	405.38	65.75	853.5	41.3517456054688	58.2392654418945
1156	118	2012-03-02	4	5	0	35.75	23.25	1	60	3	2	208	76	1	1	0	1	1	8	1927.648785	1974.724251	8.270349009	25.47967795	9.480286879	3.856306804	7	3	7.08887058	7.279907986	284.4315777	61.43687836	76.43903385	14.76848037	18.19976996	15.35921959	25.47967795	10.63330587	14.55981597	0.590739215	0	8	405.38	65.75	853.5	41.3517456054688	58.2392654418945
1157	118	2012-03-03	4	6	1	50.5	9.5	0	60	2	2	208	76	1	1	0	1	1	8	1927.648785	1974.724251	8.270349009	25.47967795	9.480286879	3.856306804	7	3	7.08887058	7.279907986	284.4315777	61.43687836	76.43903385	14.76848037	18.19976996	15.35921959	25.47967795	10.63330587	14.55981597	0.590739215	0	8	405.38	65.75	853.5	41.3517456054688	58.2392654418945
1158	122	2012-03-06	0	2	0	40	16	4	60	1	2	208	74	0	1	0	1	1	12	1671.466853	1124.491448	6.769487363	7.384249633	9.238650271	8.14418704	5	2	7.521652625	0	657.6776245	57.16455995	40.61337298	9.778148413	3.692124816	14.29113999	0	7.521652625	11.07637445	0.752165263	0	7	331.1428571	145.8571429	878.1428571	32.3431053161621	14.7684993743896
1159	122	2012-03-06	1	2	0	14.3333330154419	29	16.6666660308838	60	3	2	208	74	0	1	0	1	1	12	1671.466853	1124.491448	6.769487363	7.384249633	9.238650271	8.14418704	5	2	7.521652625	0	657.6776245	57.16455995	40.61337298	9.778148413	3.692124816	14.29113999	0	7.521652625	11.07637445	0.752165263	0	7	331.1428571	145.8571429	878.1428571	32.3431053161621	14.7684993743896
1160	122	2012-03-06	2	2	0	15.6666669845581	29	15.3333330154419	60	3	2	208	74	0	1	0	1	1	12	1671.466853	1124.491448	6.769487363	7.384249633	9.238650271	8.14418704	5	2	7.521652625	0	657.6776245	57.16455995	40.61337298	9.778148413	3.692124816	14.29113999	0	7.521652625	11.07637445	0.752165263	0	7	331.1428571	145.8571429	878.1428571	32.3431053161621	14.7684993743896
1161	122	2012-03-06	3	2	0	23.3333339691162	30.6666660308838	6	60	3	2	208	74	0	1	0	1	1	12	1671.466853	1124.491448	6.769487363	7.384249633	9.238650271	8.14418704	5	2	7.521652625	0	657.6776245	57.16455995	40.61337298	9.778148413	3.692124816	14.29113999	0	7.521652625	11.07637445	0.752165263	0	7	331.1428571	145.8571429	878.1428571	32.3431053161621	14.7684993743896
1162	122	2012-03-06	4	2	0	34.6666679382324	20	5.33333349227905	60	3	2	208	74	0	1	0	1	1	12	1671.466853	1124.491448	6.769487363	7.384249633	9.238650271	8.14418704	5	2	7.521652625	0	657.6776245	57.16455995	40.61337298	9.778148413	3.692124816	14.29113999	0	7.521652625	11.07637445	0.752165263	0	7	331.1428571	145.8571429	878.1428571	32.3431053161621	14.7684993743896
1163	122	2012-03-07	0	3	0	6.66666650772095	8	2.66666674613953	17.3333339691162	3	2	208	74	0	1	0	1	1	12	1671.466853	1124.491448	6.769487363	7.384249633	9.238650271	8.14418704	5	2	7.521652625	0	657.6776245	57.16455995	40.61337298	9.778148413	3.692124816	14.29113999	0	7.521652625	11.07637445	0.752165263	0	7	331.1428571	145.8571429	878.1428571	32.3431053161621	14.7684993743896
1164	122	2012-03-07	1	3	0	24.6666660308838	25.3333339691162	10	60	3	2	208	74	0	1	0	1	1	12	1671.466853	1124.491448	6.769487363	7.384249633	9.238650271	8.14418704	5	2	7.521652625	0	657.6776245	57.16455995	40.61337298	9.778148413	3.692124816	14.29113999	0	7.521652625	11.07637445	0.752165263	0	7	331.1428571	145.8571429	878.1428571	32.3431053161621	14.7684993743896
1165	122	2012-03-07	2	3	0	38.3333320617676	16.3333339691162	5.33333349227905	60	3	2	208	74	0	1	0	1	1	12	1671.466853	1124.491448	6.769487363	7.384249633	9.238650271	8.14418704	5	2	7.521652625	0	657.6776245	57.16455995	40.61337298	9.778148413	3.692124816	14.29113999	0	7.521652625	11.07637445	0.752165263	0	7	331.1428571	145.8571429	878.1428571	32.3431053161621	14.7684993743896
1166	122	2012-03-07	3	3	0	22.6666660308838	27	10.3333330154419	60	3	2	208	74	0	1	0	1	1	12	1671.466853	1124.491448	6.769487363	7.384249633	9.238650271	8.14418704	5	2	7.521652625	0	657.6776245	57.16455995	40.61337298	9.778148413	3.692124816	14.29113999	0	7.521652625	11.07637445	0.752165263	0	7	331.1428571	145.8571429	878.1428571	32.3431053161621	14.7684993743896
1167	122	2012-03-07	4	3	0	21.3333339691162	25.3333339691162	13.3333330154419	60	3	2	208	74	0	1	0	1	1	12	1671.466853	1124.491448	6.769487363	7.384249633	9.238650271	8.14418704	5	2	7.521652625	0	657.6776245	57.16455995	40.61337298	9.778148413	3.692124816	14.29113999	0	7.521652625	11.07637445	0.752165263	0	7	331.1428571	145.8571429	878.1428571	32.3431053161621	14.7684993743896
1168	122	2012-03-08	0	4	0	3.33333325386047	10.3333330154419	1	14.6666669845581	3	2	208	74	0	1	0	1	1	12	1671.466853	1124.491448	6.769487363	7.384249633	9.238650271	8.14418704	5	2	7.521652625	0	657.6776245	57.16455995	40.61337298	9.778148413	3.692124816	14.29113999	0	7.521652625	11.07637445	0.752165263	0	7	331.1428571	145.8571429	878.1428571	32.3431053161621	14.7684993743896
1169	122	2012-03-08	1	4	0	23.6666660308838	30.6666660308838	5.66666650772095	60	3	2	208	74	0	1	0	1	1	12	1671.466853	1124.491448	6.769487363	7.384249633	9.238650271	8.14418704	5	2	7.521652625	0	657.6776245	57.16455995	40.61337298	9.778148413	3.692124816	14.29113999	0	7.521652625	11.07637445	0.752165263	0	7	331.1428571	145.8571429	878.1428571	32.3431053161621	14.7684993743896
1170	122	2012-03-08	2	4	0	33	25.6666660308838	1.33333337306976	60	3	2	208	74	0	1	0	1	1	12	1671.466853	1124.491448	6.769487363	7.384249633	9.238650271	8.14418704	5	2	7.521652625	0	657.6776245	57.16455995	40.61337298	9.778148413	3.692124816	14.29113999	0	7.521652625	11.07637445	0.752165263	0	7	331.1428571	145.8571429	878.1428571	32.3431053161621	14.7684993743896
1171	122	2012-03-08	3	4	0	26.6666660308838	26.3333339691162	7	60	3	2	208	74	0	1	0	1	1	12	1671.466853	1124.491448	6.769487363	7.384249633	9.238650271	8.14418704	5	2	7.521652625	0	657.6776245	57.16455995	40.61337298	9.778148413	3.692124816	14.29113999	0	7.521652625	11.07637445	0.752165263	0	7	331.1428571	145.8571429	878.1428571	32.3431053161621	14.7684993743896
1172	122	2012-03-08	4	4	0	41	10.3333330154419	8.66666698455811	60	3	2	208	74	0	1	0	1	1	12	1671.466853	1124.491448	6.769487363	7.384249633	9.238650271	8.14418704	5	2	7.521652625	0	657.6776245	57.16455995	40.61337298	9.778148413	3.692124816	14.29113999	0	7.521652625	11.07637445	0.752165263	0	7	331.1428571	145.8571429	878.1428571	32.3431053161621	14.7684993743896
1173	122	2012-03-09	0	5	0	4	5	3.66666674613953	12.6666669845581	3	2	208	74	0	1	0	1	1	12	1671.466853	1124.491448	6.769487363	7.384249633	9.238650271	8.14418704	5	2	7.521652625	0	657.6776245	57.16455995	40.61337298	9.778148413	3.692124816	14.29113999	0	7.521652625	11.07637445	0.752165263	0	7	331.1428571	145.8571429	878.1428571	32.3431053161621	14.7684993743896
1174	122	2012-03-09	1	5	0	10	32.6666679382324	17.3333339691162	60	3	2	208	74	0	1	0	1	1	12	1671.466853	1124.491448	6.769487363	7.384249633	9.238650271	8.14418704	5	2	7.521652625	0	657.6776245	57.16455995	40.61337298	9.778148413	3.692124816	14.29113999	0	7.521652625	11.07637445	0.752165263	0	7	331.1428571	145.8571429	878.1428571	32.3431053161621	14.7684993743896
1175	122	2012-03-09	2	5	0	24.6666660308838	24.3333339691162	11	60	3	2	208	74	0	1	0	1	1	12	1671.466853	1124.491448	6.769487363	7.384249633	9.238650271	8.14418704	5	2	7.521652625	0	657.6776245	57.16455995	40.61337298	9.778148413	3.692124816	14.29113999	0	7.521652625	11.07637445	0.752165263	0	7	331.1428571	145.8571429	878.1428571	32.3431053161621	14.7684993743896
1176	122	2012-03-09	3	5	0	24.3333339691162	18.6666660308838	17	60	3	2	208	74	0	1	0	1	1	12	1671.466853	1124.491448	6.769487363	7.384249633	9.238650271	8.14418704	5	2	7.521652625	0	657.6776245	57.16455995	40.61337298	9.778148413	3.692124816	14.29113999	0	7.521652625	11.07637445	0.752165263	0	7	331.1428571	145.8571429	878.1428571	32.3431053161621	14.7684993743896
1177	122	2012-03-09	4	5	0	4.66666650772095	42.6666679382324	12.6666669845581	60	3	2	208	74	0	1	0	1	1	12	1671.466853	1124.491448	6.769487363	7.384249633	9.238650271	8.14418704	5	2	7.521652625	0	657.6776245	57.16455995	40.61337298	9.778148413	3.692124816	14.29113999	0	7.521652625	11.07637445	0.752165263	0	7	331.1428571	145.8571429	878.1428571	32.3431053161621	14.7684993743896
1178	122	2012-03-10	0	6	1	1.33333337306976	4.66666650772095	3.66666674613953	9.66666698455811	3	2	208	74	0	1	0	1	1	12	1671.466853	1124.491448	6.769487363	7.384249633	9.238650271	8.14418704	5	2	7.521652625	0	657.6776245	57.16455995	40.61337298	9.778148413	3.692124816	14.29113999	0	7.521652625	11.07637445	0.752165263	0	7	331.1428571	145.8571429	878.1428571	32.3431053161621	14.7684993743896
1179	122	2012-03-10	1	6	1	35.6666679382324	20	4.33333349227905	60	3	2	208	74	0	1	0	1	1	12	1671.466853	1124.491448	6.769487363	7.384249633	9.238650271	8.14418704	5	2	7.521652625	0	657.6776245	57.16455995	40.61337298	9.778148413	3.692124816	14.29113999	0	7.521652625	11.07637445	0.752165263	0	7	331.1428571	145.8571429	878.1428571	32.3431053161621	14.7684993743896
1180	122	2012-03-10	2	6	1	42.6666679382324	8.66666698455811	8.66666698455811	60	3	2	208	74	0	1	0	1	1	12	1671.466853	1124.491448	6.769487363	7.384249633	9.238650271	8.14418704	5	2	7.521652625	0	657.6776245	57.16455995	40.61337298	9.778148413	3.692124816	14.29113999	0	7.521652625	11.07637445	0.752165263	0	7	331.1428571	145.8571429	878.1428571	32.3431053161621	14.7684993743896
1181	122	2012-03-10	3	6	1	41.6666679382324	10.6666669845581	7.66666650772095	60	3	2	208	74	0	1	0	1	1	12	1671.466853	1124.491448	6.769487363	7.384249633	9.238650271	8.14418704	5	2	7.521652625	0	657.6776245	57.16455995	40.61337298	9.778148413	3.692124816	14.29113999	0	7.521652625	11.07637445	0.752165263	0	7	331.1428571	145.8571429	878.1428571	32.3431053161621	14.7684993743896
[truncated: 11,878 more rows]
